# Supplementary material for: Achromobacter spp. Adaptation in Cystic Fibrosis Infection and Candidate Biomarkers of Antimicrobial Resistance
Source: MDPI journal article supplement (doi:10.3390/ijms23169265), 2022-08-17
Supplement: s1 [file s1]

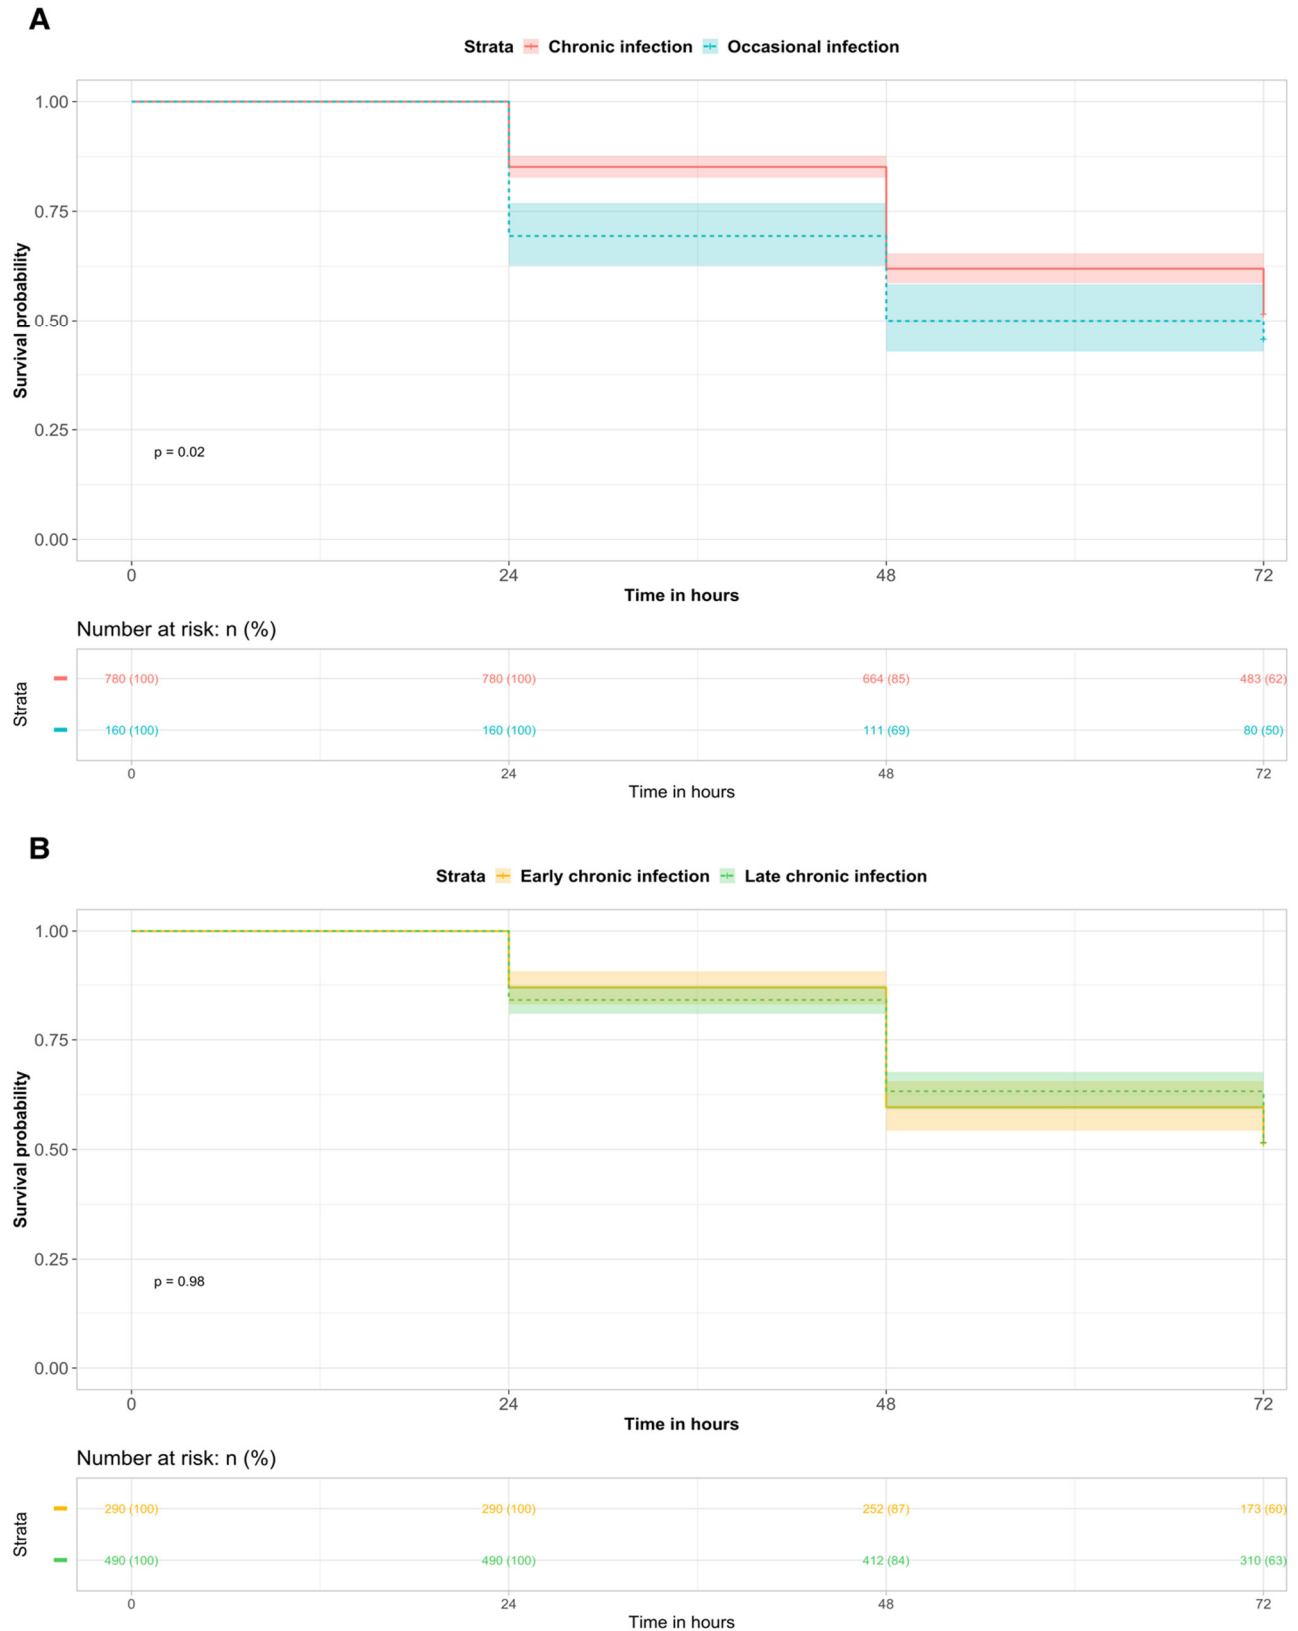

**Figure S1. *Galleria mellonella* survival curve for virulence testing.** The survival probabilities of *G. mellonella* larvae infected with chronic or occasional infection isolates (**A**) and with early or late chronic infection isolates (**B**) are reported at each time point. The p-values of the survival curves comparisons are indicated with p. Risk tables indicating the absolute number and the percentage (between parenthesis) of *G. mellonella* larvae at risk by time for each group (strata) are also reported.

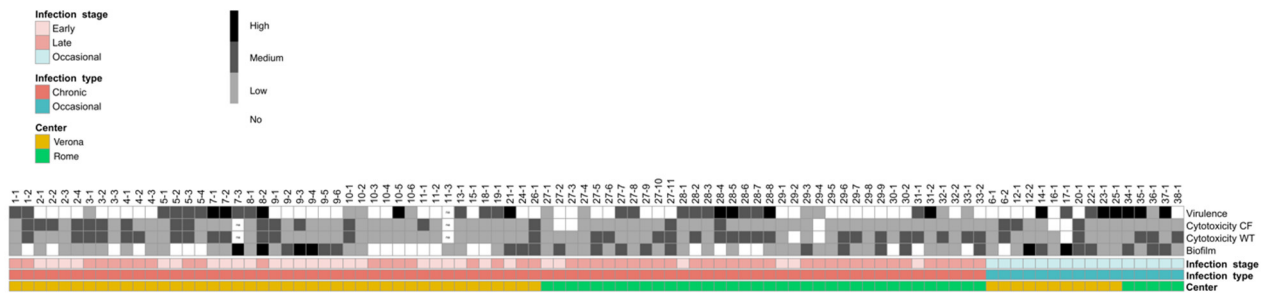

**Figure S2. Virulence, cytotoxicity in WT and CF cells, and biofilm formation results per isolate.** Each feature was defined as high, medium, low or none as follows. Biofilm was classified as proposed by Stepanovic and colleagues (2007, doi:10.1111/j.1600-0463.2007.apm\_630.x). Cytotoxicity's lower cut-off was calculated as SD above the mean OD of the blank; 2- and 4-folds values were used to discriminate between the other levels. Virulence was defined from high to low with at least 50% larvae mortality within 24, 48 and 72 hours respectively and none with less than 50% mortality at 72 hours. na=not available.

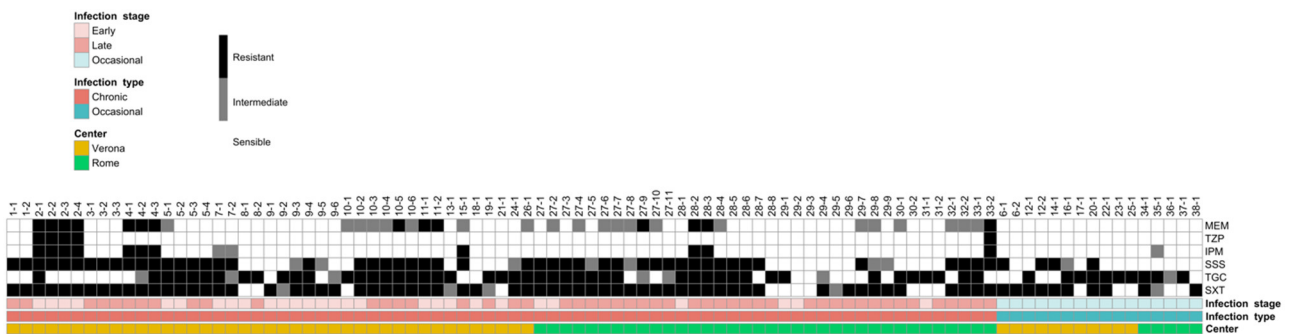

**Figure S3. Antimicrobial susceptibility results per isolate.** Susceptibility to antibiotics was tested by Kirby-Bauer disk diffusion test (SXT=trimethoprim-sulfamethoxazole, TGC=tigecycline, SSS=sulfonamide, IPM=imipenem; TZP=piperacillin-tazobactam, MEM=meropenem).
