# Supplementary material for: Achromobacter spp. Adaptation in Cystic Fibrosis Infection and Candidate Biomarkers of Antimicrobial Resistance
Source: Int J Mol Sci. 2022 Aug 17;23(16):9265. doi: 10.3390/ijms23169265 (PMC9409262; doi:10.3390/ijms23169265)
Supplement: Supplementary file 1 [file ijms-23-09265-s001.zip › 07-TS1_supplementary_rev.xlsx]

## Sheet: Biofilm
CompId	NodeId	AlleleFreq	Pheno0Count	Pheno0TotalCount	Pheno1Count	Pheno1TotalCount	NACount	NATotalCount	p-value	q-Value	EstEffect	WaldStat	Sequence	SequenceLength	Annotations(sep=~~~)
0	n121580	1	0	39	1	15	0	0	3.78127e-08	0.00047463	0.706187	6.25023	CCGCACGCGGCGCGACGGCGTGGAACTGGGCTGGTCCGGCGAATTCGCCCGTCACGGCCGT	61	tr|A0A6S7F235|A0A6S7F235_9BURK_Metal-pseudopaline_receptor_CntO_OS=Achromobacter_insolitus_OX=217204_GN=cntO_1_PE=3_SV=1~~~tr|A0A6S7A4S5|A0A6S7A4S5_9BURK_Metal-pseudopaline_receptor_CntO_OS=Achromobacter_kerstersii_OX=1353890_GN=cntO_6_PE=3_SV=1~~~tr|A0A424W3X7|A0A424W3X7_ALCXX_TonB-dependent_receptor_OS=Alcaligenes_xylosoxydans_xylosoxydans_OX=85698_GN=DY367_30150_PE=3_SV=1~~~tr|A0A6S7BYQ5|A0A6S…
0	n150638	1	0	39	1	15	0	0	3.78127e-08	0.00047463	0.706187	6.25023	TATGGTGTTGAATATATAACGAAATGCCTCTGCAATCCTTGCCTGGCCGCAAGGCTGGCCC	61	tr|A0A514CUN6|A0A514CUN6_9CAUD_Uncharacterized_protein_OS=Achromobacter_phage_vB_AxyP_19-32_Axy13_OX=2591044_GN=Axy13_013_PE=4_SV=1
0	n229854	1	0	39	1	15	0	0	3.78127e-08	0.00047463	0.706187	6.25023	CGAGGCGAAGGCGGCCTGGGCTGCGATGCCTGGGATCTTGTTGCCGGCGCGGACGTCGCCGGGTCCGTCATCGGCGTAACGCGC	84	tr|A0A6S7F235|A0A6S7F235_9BURK_Metal-pseudopaline_receptor_CntO_OS=Achromobacter_insolitus_OX=217204_GN=cntO_1_PE=3_SV=1~~~tr|A0A6S7A4S5|A0A6S7A4S5_9BURK_Metal-pseudopaline_receptor_CntO_OS=Achromobacter_kerstersii_OX=1353890_GN=cntO_6_PE=3_SV=1~~~tr|A0A424W3X7|A0A424W3X7_ALCXX_TonB-dependent_receptor_OS=Alcaligenes_xylosoxydans_xylosoxydans_OX=85698_GN=DY367_30150_PE=3_SV=1~~~tr|A0A6S7BYQ5|A0A6S…
0	n420438	1	0	39	1	15	0	0	3.78127e-08	0.00047463	0.706187	6.25023	CGACCTGAAGCGCCAGTACGGCGGCGCGGATCTGCGCTGGACCTCCGAGCTGGCGGTGGCAGGCCGGCCGCTGACCCTGATCGGCGG	87	tr|A0A6S7F235|A0A6S7F235_9BURK_Metal-pseudopaline_receptor_CntO_OS=Achromobacter_insolitus_OX=217204_GN=cntO_1_PE=3_SV=1~~~tr|A0A6S7A4S5|A0A6S7A4S5_9BURK_Metal-pseudopaline_receptor_CntO_OS=Achromobacter_kerstersii_OX=1353890_GN=cntO_6_PE=3_SV=1~~~tr|A0A424W3X7|A0A424W3X7_ALCXX_TonB-dependent_receptor_OS=Alcaligenes_xylosoxydans_xylosoxydans_OX=85698_GN=DY367_30150_PE=3_SV=1~~~tr|A0A6S7BYQ5|A0A6S…
0	n503085	1	0	39	1	15	0	0	3.78127e-08	0.00047463	0.706187	6.25023	AGGGCGCAGCCTGGGAGCGGGCCTGGGCGCCACGTACCGGTTCTGAAGCCGGGCTTCAGTCCGGCATTTCCGGATAGCAGAAGCCATGGTCCTCGCAGGCCGGACAGCCCGG	112	tr|A0A6S7F235|A0A6S7F235_9BURK_Metal-pseudopaline_receptor_CntO_OS=Achromobacter_insolitus_OX=217204_GN=cntO_1_PE=3_SV=1~~~tr|A0A424W3X7|A0A424W3X7_ALCXX_TonB-dependent_receptor_OS=Alcaligenes_xylosoxydans_xylosoxydans_OX=85698_GN=DY367_30150_PE=3_SV=1~~~tr|A0A6S7BYQ5|A0A6S7BYQ5_9BURK_Metal-pseudopaline_receptor_CntO_OS=Achromobacter_piechaudii_OX=72556_GN=cntO_2_PE=3_SV=1~~~tr|D4XI85|D4XI85_9BUR…
0	n555762	1	0	39	1	15	0	0	3.78127e-08	0.00047463	0.706187	6.25023	GGCCCAGGTGTCCAGCAGCGCGCGCAGCAGACGCGTGAATTCGGTTTGAGCCGCATCCATG	61	tr|A0A6S7EZ12|A0A6S7EZ12_9BURK_Uncharacterized_protein_OS=Achromobacter_insolitus_OX=217204_GN=LMG6000_01562_PE=3_SV=1~~~tr|F7SWB5|F7SWB5_9BURK_NifQ_family_protein_OS=Achromobacter_insuavis_AXX-A_OX=1003200_GN=AXXA_04813_PE=3_SV=1~~~tr|A0A109XYS7|A0A109XYS7_ALCXX_Nitrogen_fixation_protein_NifQ_OS=Alcaligenes_xylosoxydans_xylosoxydans_OX=85698_GN=AL504_24765_PE=3_SV=1~~~tr|A0A5N8A060|A0A5N8A060_9B…
0	n572292	1	0	39	1	15	0	0	3.78127e-08	0.00047463	0.706187	6.25023	AGCCCCCCCGGCCGACAGCGCCGGTCCCACCTTGCGGTTCGCCGGCGCGCTGCTGCGCCAT	61	tr|A0A6S7EZ12|A0A6S7EZ12_9BURK_Uncharacterized_protein_OS=Achromobacter_insolitus_OX=217204_GN=LMG6000_01562_PE=3_SV=1~~~tr|A0A424W432|A0A424W432_ALCXX_Nitrogen_fixation_protein_NifQ_OS=Alcaligenes_xylosoxydans_xylosoxydans_OX=85698_GN=DY367_30155_PE=3_SV=1~~~tr|E3HU19|E3HU19_ACHXA_NifQ_family_protein_OS=Achromobacter_xylosoxidans_(strain_A8)_OX=762376_GN=AXYL_05292_PE=3_SV=1~~~tr|A0A658AD04|A0A6…
0	n588700	1	0	39	1	15	0	0	3.78127e-08	0.00047463	0.706187	6.25023	CCCCGGCCATATGAAGCGTAGAAGCTCAGGCCGGCGTTCGGCGCATAGCGGATGGCCGCCA	61	tr|A0A6S7F235|A0A6S7F235_9BURK_Metal-pseudopaline_receptor_CntO_OS=Achromobacter_insolitus_OX=217204_GN=cntO_1_PE=3_SV=1~~~tr|A0A6S7A4S5|A0A6S7A4S5_9BURK_Metal-pseudopaline_receptor_CntO_OS=Achromobacter_kerstersii_OX=1353890_GN=cntO_6_PE=3_SV=1~~~tr|A0A424W3X7|A0A424W3X7_ALCXX_TonB-dependent_receptor_OS=Alcaligenes_xylosoxydans_xylosoxydans_OX=85698_GN=DY367_30150_PE=3_SV=1~~~tr|A0A6S7BYQ5|A0A6S…
0	n842865	1	0	39	1	15	0	0	3.78127e-08	0.00047463	0.706187	6.25023	GGCCCAACCATGCACGTCGTTTCCATCGCCTCCGCAGCCCCCCCGGCCGACAGCGCCGGTC	61
0	n946115	1	0	39	1	15	0	0	3.78127e-08	0.00047463	0.706187	6.25023	CCAGGACGACCCGCGCGCGGCGCCGCTGGCTGAGCAGTACGACACCCGCAAGACGGTCAGG	61	tr|A0A6S7F235|A0A6S7F235_9BURK_Metal-pseudopaline_receptor_CntO_OS=Achromobacter_insolitus_OX=217204_GN=cntO_1_PE=3_SV=1~~~tr|A0A6S7A4S5|A0A6S7A4S5_9BURK_Metal-pseudopaline_receptor_CntO_OS=Achromobacter_kerstersii_OX=1353890_GN=cntO_6_PE=3_SV=1~~~tr|A0A424W3X7|A0A424W3X7_ALCXX_TonB-dependent_receptor_OS=Alcaligenes_xylosoxydans_xylosoxydans_OX=85698_GN=DY367_30150_PE=3_SV=1~~~tr|A0A6S7BYQ5|A0A6S…
0	n984442	1	0	39	1	15	0	0	3.78127e-08	0.00047463	0.706187	6.25023	TTCGCTGCTTCTCACCTTCGGCTCCTTCGGC	31
0	n989787	1	0	39	1	15	0	0	3.78127e-08	0.00047463	0.706187	6.25023	CGCGTGAATTCGGTTTGAGCCGCATCCATGCCGCAGGCCGGGTAGATGGCGGCTTGCTCGCGCAA	65	tr|A0A6S7EZ12|A0A6S7EZ12_9BURK_Uncharacterized_protein_OS=Achromobacter_insolitus_OX=217204_GN=LMG6000_01562_PE=3_SV=1~~~tr|A0A446CYM4|A0A446CYM4_9BURK_Uncharacterized_protein_OS=Achromobacter_veterisilvae_OX=2069367_GN=AVE30378_05431_PE=3_SV=1~~~tr|A0A424W432|A0A424W432_ALCXX_Nitrogen_fixation_protein_NifQ_OS=Alcaligenes_xylosoxydans_xylosoxydans_OX=85698_GN=DY367_30155_PE=3_SV=1~~~tr|A0A6S7EX68…
0	n1022468	1	0	39	1	15	0	0	3.78127e-08	0.00047463	0.706187	6.25023	GGCCAGGAACTGCTTCCAGCGCAGGTTGCGCACATTGCGCACCACCAGTCCCGGATAGTGG	61	tr|A0A6S7EZ12|A0A6S7EZ12_9BURK_Uncharacterized_protein_OS=Achromobacter_insolitus_OX=217204_GN=LMG6000_01562_PE=3_SV=1~~~tr|A0A6S6Z8U3|A0A6S6Z8U3_9BURK_Uncharacterized_protein_OS=Achromobacter_deleyi_OX=1353891_GN=LMG3458_00948_PE=3_SV=1~~~tr|F7SWB5|F7SWB5_9BURK_NifQ_family_protein_OS=Achromobacter_insuavis_AXX-A_OX=1003200_GN=AXXA_04813_PE=3_SV=1~~~tr|A0A7T4B863|A0A7T4B863_9BURK_Nitrogen_fixatio…
0	n1383350	1	0	39	1	15	0	0	3.78127e-08	0.00047463	0.706187	6.25023	GGCCTGGTGATGAACGGCGGACTGTCCCACGCC	33	tr|A0A7D4IJB0|A0A7D4IJB0_9BURK_Cytochrome_bo(3)_ubiquinol_oxidase_subunit_4_OS=Achromobacter_pestifer_OX=1353889_GN=cyoD_PE=3_SV=1~~~tr|A0A2T5CRW3|A0A2T5CRW3_ALCXX_Cytochrome_bo(3)_ubiquinol_oxidase_subunit_4_OS=Alcaligenes_xylosoxydans_xylosoxydans_OX=85698_GN=cyoD_PE=3_SV=1~~~tr|A0A6S7F315|A0A6S7F315_9BURK_Cytochrome_bo(3)_ubiquinol_oxidase_subunit_4_OS=Achromobacter_anxifer_OX=1287737_GN=cyoD_…
1	n963	1	0	39	1	15	0	0	3.78127e-08	0.00047463	0.706187	6.25023	TGAAGCAAACGCTGTGCCAGAAAGAAAAAACCATGGCCGGAAAGGCCGCCAGCCCGCGCCCCCGCTGACGCTGCCTCGCCAATCGGCGCGC	91	tr|A0A446C8R4|A0A446C8R4_9BURK_NMT1_domain-containing_protein_OS=Achromobacter_veterisilvae_OX=2069367_GN=AVE30378_00909_PE=4_SV=1~~~tr|A0A7D4DVF2|A0A7D4DVF2_9BURK_ABC_transporter_substrate-binding_protein_OS=Achromobacter_pestifer_OX=1353889_GN=FOC84_06140_PE=4_SV=1~~~tr|A0A095V4R6|A0A095V4R6_9BURK_ABC_transporter_substrate-binding_protein_OS=Achromobacter_sp._RTa_OX=1532557_GN=JL37_09450_PE=4_S…
1	n72458	1	0	39	1	15	0	0	3.78127e-08	0.00047463	0.706187	6.25023	CGCAACCGGAGGTGCACCAAGTTGGTTCGCGCCCTGTTTTCCGTCAACACGGAGTGCGCGCCGATTGGCGAGGCAGCGT	79	tr|A0A0M7IBV2|A0A0M7IBV2_9BURK_Uncharacterized_protein_OS=Achromobacter_aegrifaciens_OX=1287736_GN=ERS370000_03120_PE=4_SV=1~~~tr|A0A658A268|A0A658A268_ALCXX_Uncharacterized_protein_OS=Alcaligenes_xylosoxydans_xylosoxydans_OX=85698_GN=DAI43_34955_PE=4_SV=1~~~tr|A0A2S5GNU4|A0A2S5GNU4_9BURK_Response_regulator_OS=Achromobacter_spanius_OX=217203_GN=C4E15_18850_PE=4_SV=1
1	n157706	1	0	39	1	15	0	0	3.78127e-08	0.00047463	0.706187	6.25023	GAATCCGGGGCGCGCGGGACGTTTTTTTTTGCCAGGA	37
1	n342199	1	0	39	1	15	0	0	3.78127e-08	0.00047463	0.706187	6.25023	CTTCTCCATGGCGAAGCGCTCGATCGCCACCGTCAGCAGCGGCTCGATGCGTCCGGCAGGC	61	tr|A0A7D4E224|A0A7D4E224_9BURK_ANTAR_domain-containing_protein_OS=Achromobacter_pestifer_OX=1353889_GN=FOC84_20305_PE=4_SV=1~~~tr|E3HRG4|E3HRG4_ACHXA_Response_regulator_13_OS=Achromobacter_xylosoxidans_(strain_A8)_OX=762376_GN=AXYL_05136_PE=4_SV=1~~~tr|A0A424W790|A0A424W790_ALCXX_ANTAR_domain-containing_protein_OS=Alcaligenes_xylosoxydans_xylosoxydans_OX=85698_GN=DY367_24540_PE=4_SV=1~~~tr|A0A6S7…
1	n410469	1	0	39	1	15	0	0	3.78127e-08	0.00047463	0.706187	6.25023	GGAAGCCTCCGCCGACGTGCTGGTGGGAGCGCCGGAACTGACGCCCGCCCTGGCCGCGCTG	61	tr|A0A0M9I6B5|A0A0M9I6B5_9BURK_Siroheme_synthase_OS=Achromobacter_aegrifaciens_OX=1287736_GN=cysG_3_PE=3_SV=1~~~tr|A0A658AM18|A0A658AM18_ALCXX_Precorrin-2_dehydrogenase_(Fragment)_OS=Alcaligenes_xylosoxydans_xylosoxydans_OX=85698_GN=DAI43_00315_PE=4_SV=1~~~tr|A0A6S6ZTF5|A0A6S6ZTF5_9BURK_Siroheme_synthase_OS=Achromobacter_pestifer_OX=1353889_GN=cysG_PE=3_SV=1~~~tr|A0A446CY85|A0A446CY85_9BURK_Siroh…
1	n576880	1	0	39	1	15	0	0	3.78127e-08	0.00047463	0.706187	6.25023	GATCACGCCGTCCAAGGAAGCGTCCTGGGCTGCCGTGCGCGACAAGCTCATGAACGGCGAG	61	tr|H0F7G1|H0F7G1_9BURK_Nitrate_transporter_NrtA_OS=Achromobacter_arsenitoxydans_SY8_OX=477184_GN=KYC_13537_PE=4_SV=1~~~tr|E3HRG3|E3HRG3_ACHXA_Nitrate_transport_protein_NrtA_OS=Achromobacter_xylosoxidans_(strain_A8)_OX=762376_GN=AXYL_05135_PE=3_SV=1~~~tr|A0A6S7EYY3|A0A6S7EYY3_9BURK_Nitrate/nitrite_binding_protein_NrtA_OS=Achromobacter_insolitus_OX=217204_GN=nrtA_PE=3_SV=1~~~tr|A0A424W720|A0A424W72…
1	n712366	1	0	39	1	15	0	0	3.78127e-08	0.00047463	0.706187	6.25023	TAACGCCACCCAGGCCCGCATCCACAGGCTAATGGTCGAGCACGCGCGCGCCGGCCGCCGC	61	tr|A0A6S7F7C1|A0A6S7F7C1_9BURK_Siroheme_synthase_OS=Achromobacter_insolitus_OX=217204_GN=cysG_PE=3_SV=1~~~tr|A0A0M9I6B5|A0A0M9I6B5_9BURK_Siroheme_synthase_OS=Achromobacter_aegrifaciens_OX=1287736_GN=cysG_3_PE=3_SV=1~~~tr|A0A6S6ZTF5|A0A6S6ZTF5_9BURK_Siroheme_synthase_OS=Achromobacter_pestifer_OX=1353889_GN=cysG_PE=3_SV=1~~~tr|A0A446CY85|A0A446CY85_9BURK_Siroheme_synthase_OS=Achromobacter_agilis_OX…
1	n757387	1	0	39	1	15	0	0	3.78127e-08	0.00047463	0.706187	6.25023	GAACGGCGAGCTGGACATGGCCCACGTGCTATACGGCCTGGTCTACGGCGTGCACCTGGGC	61	tr|H0F7G1|H0F7G1_9BURK_Nitrate_transporter_NrtA_OS=Achromobacter_arsenitoxydans_SY8_OX=477184_GN=KYC_13537_PE=4_SV=1~~~tr|E3HRG3|E3HRG3_ACHXA_Nitrate_transport_protein_NrtA_OS=Achromobacter_xylosoxidans_(strain_A8)_OX=762376_GN=AXYL_05135_PE=3_SV=1~~~tr|A0A6S7EYY3|A0A6S7EYY3_9BURK_Nitrate/nitrite_binding_protein_NrtA_OS=Achromobacter_insolitus_OX=217204_GN=nrtA_PE=3_SV=1~~~tr|A0A424W720|A0A424W72…
1	n818681	1	0	39	1	15	0	0	3.78127e-08	0.00047463	0.706187	6.25023	TACCCTGGGCCAGTTGGCCGGACTGGCCGCCAGCTACCGCAAGCGCATCCGCGCCAGCCATCC	63	tr|A0A6S7F7C1|A0A6S7F7C1_9BURK_Siroheme_synthase_OS=Achromobacter_insolitus_OX=217204_GN=cysG_PE=3_SV=1~~~tr|A0A0M9I6B5|A0A0M9I6B5_9BURK_Siroheme_synthase_OS=Achromobacter_aegrifaciens_OX=1287736_GN=cysG_3_PE=3_SV=1~~~tr|A0A658AM18|A0A658AM18_ALCXX_Precorrin-2_dehydrogenase_(Fragment)_OS=Alcaligenes_xylosoxydans_xylosoxydans_OX=85698_GN=DAI43_00315_PE=4_SV=1~~~tr|A0A6S6ZTF5|A0A6S6ZTF5_9BURK_Siroh…
1	n940204	1	0	39	1	15	0	0	3.78127e-08	0.00047463	0.706187	6.25023	GGACGGCCCGGTGGCCGGCTTCCTGCGCCAGCAGCAGCCGGCCCAGGCCGAAGCCGCGTTG	61	tr|A0A6S7F7C1|A0A6S7F7C1_9BURK_Siroheme_synthase_OS=Achromobacter_insolitus_OX=217204_GN=cysG_PE=3_SV=1~~~tr|A0A0M9I6B5|A0A0M9I6B5_9BURK_Siroheme_synthase_OS=Achromobacter_aegrifaciens_OX=1287736_GN=cysG_3_PE=3_SV=1~~~tr|A0A658AM18|A0A658AM18_ALCXX_Precorrin-2_dehydrogenase_(Fragment)_OS=Alcaligenes_xylosoxydans_xylosoxydans_OX=85698_GN=DAI43_00315_PE=4_SV=1~~~tr|A0A6S6ZTF5|A0A6S6ZTF5_9BURK_Siroh…
1	n1173620	1	0	39	1	15	0	0	3.78127e-08	0.00047463	0.706187	6.25023	CAGCTTGGCCAGCGATTCGCCGTCGCGCACGCCCGCCGCCAGCAGCTTGTTCGACAGCGTG	61	tr|H0F7G1|H0F7G1_9BURK_Nitrate_transporter_NrtA_OS=Achromobacter_arsenitoxydans_SY8_OX=477184_GN=KYC_13537_PE=4_SV=1~~~tr|E3HRG3|E3HRG3_ACHXA_Nitrate_transport_protein_NrtA_OS=Achromobacter_xylosoxidans_(strain_A8)_OX=762376_GN=AXYL_05135_PE=3_SV=1~~~tr|A0A6S7EYY3|A0A6S7EYY3_9BURK_Nitrate/nitrite_binding_protein_NrtA_OS=Achromobacter_insolitus_OX=217204_GN=nrtA_PE=3_SV=1~~~tr|A0A424W720|A0A424W72…
2	n420255	1	0	39	1	15	0	0	3.78127e-08	0.00047463	0.706187	6.25023	CTGTCACGCCACGCTCAGATCATGCGGGCGACGCGCCCCGCCACGGCGGCGCAGTGAATGGAAACATCCGCCCCGGCAAAC	81
2	n463180	1	0	39	1	15	0	0	3.78127e-08	0.00047463	0.706187	6.25023	GGCCGATGTCACGCGCCTGCGCGCAGCGGGATTCCAGGCGCCGATGCGCGATGTGCGGACC	61	tr|A0A424W9H2|A0A424W9H2_ALCXX_ADP-L-glycero-D-manno-heptose-6-epimerase_OS=Alcaligenes_xylosoxydans_xylosoxydans_OX=85698_GN=rfaD_PE=3_SV=1~~~tr|A0A6S7F8Y5|A0A6S7F8Y5_9BURK_ADP-L-glycero-D-manno-heptose-6-epimerase_OS=Achromobacter_insolitus_OX=217204_GN=hldD_PE=3_SV=1~~~tr|A0A7D4I5Z0|A0A7D4I5Z0_9BURK_ADP-L-glycero-D-manno-heptose-6-epimerase_OS=Achromobacter_pestifer_OX=1353889_GN=rfaD_PE=3_SV=…
2	n487274	1	0	39	1	15	0	0	3.78127e-08	0.00047463	0.706187	6.25023	AAGGAATGGATTCATGGAGGGTCTCCCAGGAGTCTGGCGCAACGGCTGTCACGCCACG	58	tr|A0A6S7FDQ4|A0A6S7FDQ4_9BURK_Cbb3-type_cytochrome_c_oxidase_subunit_OS=Achromobacter_insolitus_OX=217204_GN=ccoP_PE=3_SV=1~~~tr|A0A7D4IKS9|A0A7D4IKS9_9BURK_Cbb3-type_cytochrome_c_oxidase_subunit_OS=Achromobacter_pestifer_OX=1353889_GN=ccoP_PE=3_SV=1~~~tr|A0A424WEP4|A0A424WEP4_ALCXX_Cbb3-type_cytochrome_c_oxidase_subunit_OS=Alcaligenes_xylosoxydans_xylosoxydans_OX=85698_GN=ccoP_PE=3_SV=1~~~tr|E3…
2	n565785	1	0	39	1	15	0	0	3.78127e-08	0.00047463	0.706187	6.25023	CCCCGCCAACGAAGGCCCGCTGAACGTCTACGGC	34	tr|A0A424W9H2|A0A424W9H2_ALCXX_ADP-L-glycero-D-manno-heptose-6-epimerase_OS=Alcaligenes_xylosoxydans_xylosoxydans_OX=85698_GN=rfaD_PE=3_SV=1~~~tr|A0A6S7F8Y5|A0A6S7F8Y5_9BURK_ADP-L-glycero-D-manno-heptose-6-epimerase_OS=Achromobacter_insolitus_OX=217204_GN=hldD_PE=3_SV=1~~~tr|A0A7D4I5Z0|A0A7D4I5Z0_9BURK_ADP-L-glycero-D-manno-heptose-6-epimerase_OS=Achromobacter_pestifer_OX=1353889_GN=rfaD_PE=3_SV=…
2	n615222	1	0	39	1	15	0	0	3.78127e-08	0.00047463	0.706187	6.25023	CGGCTATTCCAAGCTGCTGTTCGATCAGGTC	31	tr|A0A424W9H2|A0A424W9H2_ALCXX_ADP-L-glycero-D-manno-heptose-6-epimerase_OS=Alcaligenes_xylosoxydans_xylosoxydans_OX=85698_GN=rfaD_PE=3_SV=1~~~tr|A0A6S7F8Y5|A0A6S7F8Y5_9BURK_ADP-L-glycero-D-manno-heptose-6-epimerase_OS=Achromobacter_insolitus_OX=217204_GN=hldD_PE=3_SV=1~~~tr|A0A7D4I5Z0|A0A7D4I5Z0_9BURK_ADP-L-glycero-D-manno-heptose-6-epimerase_OS=Achromobacter_pestifer_OX=1353889_GN=rfaD_PE=3_SV=…
2	n1325612	1	0	39	1	15	0	0	3.78127e-08	0.00047463	0.706187	6.25023	GCCGAAGCCAAATCCGAAGCGAAACCGGCGACGTCCCAGCCCGCGGCCCGCGCCCGGCCCT	61	tr|A0A0M7D2T8|A0A0M7D2T8_9BURK_ComE_operon_protein_1_OS=Achromobacter_aegrifaciens_OX=1287736_GN=comEA_PE=4_SV=1~~~tr|E3HVQ7|E3HVQ7_ACHXA_Helix-hairpin-helix_DNA-binding,_class_1_OS=Achromobacter_xylosoxidans_(strain_A8)_OX=762376_GN=AXYL_01723_PE=4_SV=1~~~tr|A0A424W9S5|A0A424W9S5_ALCXX_Helix-hairpin-helix_domain-containing_protein_OS=Alcaligenes_xylosoxydans_xylosoxydans_OX=85698_GN=DY367_20120_…
2	n1497286	1	0	39	1	15	0	0	3.78127e-08	0.00047463	0.706187	6.25023	GAGCGTGGCGTGACAGCCGTTGCGCCAGACTC	32
3	n80	1	0	39	1	15	0	0	3.78127e-08	0.00047463	0.706187	6.25023	TCGGAAATCCTCCAGGCCGGCAGCGCGTTTAGCGTCCGTCCAGGCCTTGTCGAACAGGTAGGGGCGGCGGATTCCGTCCTTGCCAGGCTCGCCAAAAAAAACCAACTCAGTTTCGGACGGGCGTAAGGGATTGGCAATCGCTTCGTTGAAGACGCGCGTTGCCTCGGCGGTCAGCGGTACCGTGCGAGGCGAAGAGTTCTTGGTGTGATCCAGCCGGACTACACGTCTGGCGATGTCTACTTGCCGCAGG	250	tr|A0A848NDT5|A0A848NDT5_9BURK_Site-specific_integrase_OS=Achromobacter_ruhlandii_OX=72557_GN=HGQ98_02375_PE=4_SV=1~~~tr|A0A4Q1HK13|A0A4Q1HK13_9BURK_Integrase_OS=Achromobacter_aloeverae_OX=1750518_GN=C7R54_13165_PE=4_SV=1~~~tr|A0A7Y4K4U5|A0A7Y4K4U5_9BURK_Site-specific_integrase_OS=Achromobacter_deleyi_OX=1353891_GN=HLG70_07015_PE=4_SV=1~~~tr|D4X3J6|D4X3J6_9BURK_Site-specific_recombinase,_phage_in…
3	n139	1	0	39	1	15	0	0	3.78127e-08	0.00047463	0.706187	6.25023	TTTCGATGGAGCTATCTACTTATAGATAGATATCGAGGGAAAAAAAACTCAGCCTTGCACGGGCGGGTAAG	71
3	n155	1	0	39	1	15	0	0	3.78127e-08	0.00047463	0.706187	6.25023	AGGTCATGAACCACAATGATCAAGAAGCAAAAAAAACGCCGCTAGAAATAGCGGCGTTTTT	61
3	n192	1	0	39	1	15	0	0	3.78127e-08	0.00047463	0.706187	6.25023	TCTCTTCACGGCATGGCTCCTATTCCATATAGTGAAATCATGCCGGAATTCTCTAATTTAGATCGGTACTAAAGACTGCGTTAGGGTCAGGGGCCCAACCATACCAAGCAAAAATCGCCTATTTCATTTTTATAAGGACTATCTCCCAAAGCGCATTTTTTGAGAAAAAAAAGAAAAACAGTGCAAACACCAAGGCATAAAAAGGAAAAACGGATTTTGAAAACGCCAGACAAATTTCTGATCTGACTTTATTTTCTACCGGAGTCGTATTCATTGTGAAGATATCGCTTTCGATTCGTCCAGTGGACACTTCCAAATACAGGGCCCTGTAGAGGTGCTCTTGCCGAAGATAATATACGTCTAGAAACCAGAACACGAAAATAGCAATCCCAGCAACGA…	3172	tr|A0A658AEE8|A0A658AEE8_ALCXX_Uncharacterized_protein_OS=Alcaligenes_xylosoxydans_xylosoxydans_OX=85698_GN=DAI43_18300_PE=4_SV=1~~~tr|A0A658ACC0|A0A658ACC0_ALCXX_Uncharacterized_protein_OS=Alcaligenes_xylosoxydans_xylosoxydans_OX=85698_GN=DAI43_18295_PE=4_SV=1~~~tr|A0A658A8V6|A0A658A8V6_ALCXX_Transcription_initiation_protein_OS=Alcaligenes_xylosoxydans_xylosoxydans_OX=85698_GN=DAI43_18305_PE=3_S…
3	n284	1	0	39	1	15	0	0	3.78127e-08	0.00047463	0.706187	6.25023	ACTAGTTCCTGATCCTGCAAGAAGGAGACAACATGGCTGCCATCAAAAAAACACTGGCGTTCGGGCTGGCTGGCGTCATGGCGCTGGCCAGCGTCGCCGCCATGGCGCAAACCGATTATCCGAACCGGCCCATCCGCTGGATCGT	145	tr|A0A658AHJ8|A0A658AHJ8_ALCXX_Tripartite_tricarboxylate_transporter_substrate_binding_protein_OS=Alcaligenes_xylosoxydans_xylosoxydans_OX=85698_GN=DAI43_11315_PE=3_SV=1~~~tr|A0A0M7FNI9|A0A0M7FNI9_9BURK_Argininosuccinate_lyase_OS=Achromobacter_aegrifaciens_OX=1287736_GN=ERS370000_01852_PE=3_SV=1~~~tr|A0A424WJS4|A0A424WJS4_ALCXX_Tripartite_tricarboxylate_transporter_substrate_binding_protein_OS=Al…
3	n295	1	0	39	1	15	0	0	3.78127e-08	0.00047463	0.706187	6.25023	TCCGCTGCCCGGAAAAAAACACGGAGATTTGAGATGTTCGACAGCAAGATCGGAGGCGGCG	61
3	n336	1	0	39	1	15	0	0	3.78127e-08	0.00047463	0.706187	6.25023	TTCCGGTCCAAGACGCCGCCCGGCAAATTACGCCGGGCGGCGTTTTTTTTATGCCGCGAAAATGAAAAAAACCCGCAAGGCTTGAGCGCTTGCGG	95	tr|A0A446CST1|A0A446CST1_9BURK_Fructose-1,6-bisphosphatase_class_1_OS=Achromobacter_veterisilvae_OX=2069367_GN=fbp_1_PE=3_SV=1~~~tr|A0A446CFK5|A0A446CFK5_9BURK_Uncharacterized_protein_OS=Achromobacter_veterisilvae_OX=2069367_GN=AVE30378_02144_PE=4_SV=1~~~tr|A0A3S4MY69|A0A3S4MY69_9BURK_Predicted_integral_membrane_protein_OS=Achromobacter_spanius_OX=217203_GN=NCTC13519_01029_PE=4_SV=1~~~tr|A0A6S6ZS…
3	n557	1	0	39	1	15	0	0	3.78127e-08	0.00047463	0.706187	6.25023	GCGACGATCGTACCGGCCGATTGAGGCCCGGAAAAAAATTTTTCGAATCGACTGCCCGATTGGCATGT	68	tr|A0A2N8KBX2|A0A2N8KBX2_9BURK_DUF3987_domain-containing_protein_OS=Achromobacter_pulmonis_OX=1389932_GN=C1I89_28035_PE=4_SV=1
3	n604	1	0	39	1	15	0	0	3.78127e-08	0.00047463	0.706187	6.25023	CCTCGCAAAACCCCGGGGCGGATGAAAAAAATGGGTGCATTGTCCGGACAAAAAGGGTCCG	61	tr|A0A0D6IB65|A0A0D6IB65_ALCXX_FAD:protein_FMN_transferase_OS=Alcaligenes_xylosoxydans_xylosoxydans_OX=85698_GN=apbE_PE=3_SV=1~~~tr|A0A7U0I3F7|A0A7U0I3F7_ALCXX_FAD:protein_FMN_transferase_OS=Alcaligenes_xylosoxydans_xylosoxydans_OX=85698_GN=I6I48_27840_PE=3_SV=1~~~tr|A0A0M7LK05|A0A0M7LK05_ALCXX_FAD:protein_FMN_transferase_OS=Alcaligenes_xylosoxydans_xylosoxydans_OX=85698_GN=apbE_PE=3_SV=1
3	n633	1	0	39	1	15	0	0	3.78127e-08	0.00047463	0.706187	6.25023	TTCAATGAAAAAAAGCATTCCGCTGGTATTACTGTCGTCCATGCTGCTGACGGCTTGCGGT	61	tr|A0A7Y4K616|A0A7Y4K616_9BURK_Efflux_RND_transporter_periplasmic_adaptor_subunit_OS=Achromobacter_deleyi_OX=1353891_GN=HLG70_10440_PE=3_SV=1~~~tr|E3HPW2|E3HPW2_ACHXA_Uncharacterized_protein_OS=Achromobacter_xylosoxidans_(strain_A8)_OX=762376_GN=AXYL_03800_PE=4_SV=1~~~tr|A0A658ACN9|A0A658ACN9_ALCXX_Uncharacterized_protein_OS=Alcaligenes_xylosoxydans_xylosoxydans_OX=85698_GN=DAI43_22210_PE=4_SV=1~…
3	n647	1	0	39	1	15	0	0	3.78127e-08	0.00047463	0.706187	6.25023	CAAAAAAAGCAGCCGCAAGGCTGCTTTTTTACTTGATCGTCCCGCGCACGATGC	54
3	n738	1	0	39	1	15	0	0	3.78127e-08	0.00047463	0.706187	6.25023	CGCCTCGGCACGAACCAAAAAAAGTAAGGCTGCGCATCGCTGGCCGTCAAAGATATTGAGG	61
3	n851	1	0	39	1	15	0	0	3.78127e-08	0.00047463	0.706187	6.25023	GAAGCCGTAGCGGTGCTCGAACTCGGTCGCGTCAGTTTCCCCCGGTAGCCTTCAGGCTGCCGGTGTGATCGGTCTCACATAAAACAATACGATCACGACACCCGAAATGCACAAACCGCCAATCCACTCGCTCGGCCGAAAAAACAACCACAATTATCGCGTCCTGCGCAGGCATGTGTTCCACGAGCCCCCATGCGTCCATGGAGCGCGCGGACCTCTTGGCAAAAATTCGCGGAAAACCACATCGTTACAGCCTTAATGAACAACAGAATGAACATGGCTTTCGCCAAACGGAACCGTAAAGACAACGACCGCTACGCCACGTTTCACCGATAAAAAATCAAGTACCCCGCAGGCGTACAAACTGCAAACGATCTATCAATCTTCCGAATGAGAAGG…	1841	tr|A0A7U0E568|A0A7U0E568_ALCXX_RES_domain-containing_protein_OS=Alcaligenes_xylosoxydans_xylosoxydans_OX=85698_GN=I6I48_23435_PE=3_SV=1~~~tr|A0A246Q947|A0A246Q947_9BURK_Alcohol_dehydrogenase_OS=Achromobacter_sp._HZ28_OX=2015171_GN=CEY04_09060_PE=4_SV=1~~~tr|A0A7Y4NK72|A0A7Y4NK72_9BURK_Trypsin-like_peptidase_domain-containing_protein_OS=Achromobacter_deleyi_OX=1353891_GN=HLG70_10790_PE=4_SV=1
3	n854	1	0	39	1	15	0	0	3.78127e-08	0.00047463	0.706187	6.25023	GCCGGAAAAAACAATAGCATTTGGGTCAGGGCGTCTGCCAGCAATCTTCGTTCCTGATACA	61	tr|A0A7Y4NJ24|A0A7Y4NJ24_9BURK_Histidine_kinase_OS=Achromobacter_deleyi_OX=1353891_GN=HLG70_01540_PE=4_SV=1
3	n859	1	0	39	1	15	0	0	3.78127e-08	0.00047463	0.706187	6.25023	CTTGGTGTCCAGCACCGCGTCGCGGCGCACAATCAGCACGCCAGACGCGCCCGGACCGCCGATGAATTTGTGCGGCGAAAAAACAATCGCGTCGATCGCCGCGTCGGCGGCGGGCGTCATCCGGATCGGCAGATAGGGCGCGCCGCCTGCGTAGTCCCACAGCATCTTGGCGCCCGCGGCCTTGACGCGCCGGGTCACT	199	tr|A0A658A876|A0A658A876_ALCXX_Aminotransferase_(Fragment)_OS=Alcaligenes_xylosoxydans_xylosoxydans_OX=85698_GN=DAI43_24315_PE=4_SV=1~~~tr|A0A7D4IKX2|A0A7D4IKX2_9BURK_Aminotransferase_class_V-fold_PLP-dependent_enzyme_OS=Achromobacter_pestifer_OX=1353889_GN=FOC84_24605_PE=4_SV=1~~~tr|A0A0M9ID17|A0A0M9ID17_9BURK_Probable_cysteine_desulfurase_OS=Achromobacter_aegrifaciens_OX=1287736_GN=csd_PE=4_SV=…
3	n881	1	0	39	1	15	0	0	3.78127e-08	0.00047463	0.706187	6.25023	CCTTAAAAAACACCGCTGGTCGGGCGCCCACCGCGTTTCTATGATGCCCGCAACCTCAGGC	61
3	n959	1	0	39	1	15	0	0	3.78127e-08	0.00047463	0.706187	6.25023	CGAGCCGCCACGCCGCCCGCGCCGACGGGCGGCCTACGAAAAAACCACCGCCCGCGAAAAAACCACAAAAGCAATCAACGCTTAAGCGA	89	tr|A0A0M7LTG5|A0A0M7LTG5_ALCXX_Lipopolysaccharide_core_biosynthesis_protein_OS=Alcaligenes_xylosoxydans_xylosoxydans_OX=85698_GN=ERS369984_05557_PE=4_SV=1
3	n1096	1	0	39	1	15	0	0	3.78127e-08	0.00047463	0.706187	6.25023	CCAGAGGGCAATGATGGCGCGCTGGCTCAATCGCCACGGCTGGCGCTATGTCGTCGACAAAAATGGCGTCCCGCGTGTTCTGCGGGCGTATCGAGATAAGAAACTGGGAGCAGTAGATGGCCAGCAAAAAACCGGTCTCACGTCAGCCCCGAACCGCGAAGCCTTCGCCCGCGTGGGAGAAGACCAGGATCGCAAGGCTGTACAAGCGCGTCGGCA	216	tr|A0A0M7IMM7|A0A0M7IMM7_9BURK_3\'-phosphoesterase_OS=Achromobacter_aegrifaciens_OX=1287736_GN=ERS370000_03224_PE=4_SV=1~~~tr|E3HUH3|E3HUH3_ACHXA_3\'-phosphoesterase_OS=Achromobacter_xylosoxidans_(strain_A8)_OX=762376_GN=ligD1_PE=4_SV=1~~~tr|A0A424W981|A0A424W981_ALCXX_3\'-phosphoesterase_OS=Alcaligenes_xylosoxydans_xylosoxydans_OX=85698_GN=ligD_PE=4_SV=1~~~tr|A0A6S7FC04|A0A6S7FC04_9BURK_3\'-phos…
3	n1129	1	0	39	1	15	0	0	3.78127e-08	0.00047463	0.706187	6.25023	GACAAGGACAGTTCTCGGCCAAGAGCTGCCTTTCGCAGTCGGTTCGCTTAAGATGGGTTCGAATCTAAGCGAACTCAGGCTGGTGTGTTTGTCTGAGACGAGAAATAATTGAATTAACCAAGAATCCAAAAATTGAGCTTAGTGGTTGAAGAGAATCAATAAAACTGAGCTCAAACCAGTGATAGCTATATCTCGCCAAGGGCAGAATCCCCCAGCGGCGTGCTTTTTGCCGTTGACTGACCAAACCTGCATTAGGCCCATTTTGCAATGAACATCACACAAATAGAAGAAAAAGTTAAGGCGCTCGTAGGAGGCATCAAACAGGCTGATTTCCTGTATGACTTGCTGGAGTGCTACGGAAAGCCCAAAGCCTCAATCACCCGCCTCAAGATGGCTGGC…	6679	tr|A0A0L8EN09|A0A0L8EN09_9BURK_DEAD/DEAH_box_helicase_OS=Achromobacter_sp._DMS1_OX=1688405_GN=AD428_18040_PE=4_SV=1~~~tr|A0A3Q9KDZ5|A0A3Q9KDZ5_9BURK_Site-specific_DNA-methyltransferase_(adenine-specific)_OS=Achromobacter_spanius_OX=217203_GN=ELS24_03635_PE=4_SV=1~~~tr|A0A0L8ESW3|A0A0L8ESW3_9BURK_Uncharacterized_protein_OS=Achromobacter_sp._DMS1_OX=1688405_GN=AD428_06775_PE=4_SV=1~~~tr|A0A0L8EV69|…
3	n1148	1	0	39	1	15	0	0	3.78127e-08	0.00047463	0.706187	6.25023	AGTGTCAATTAAATTTAAAAAACTGACAGTGGCGTCAAAAATTGGGGACTCACTCACGGGAAAACGCCGGCCGGCGCGGCTTGGAG	86	tr|A0A6S7A282|A0A6S7A282_9BURK_Histidine_kinase_OS=Achromobacter_kerstersii_OX=1353890_GN=rcsC_9_PE=4_SV=1
3	n1153	1	0	39	1	15	0	0	3.78127e-08	0.00047463	0.706187	6.25023	TCTGCGGACCTCCAAAAAACTGCCGTGCAAGCGAGGTTGCCCATGTCGGAAGTCGTCGTCT	61	tr|A0A0M9J303|A0A0M9J303_9BURK_p-hydroxybenzoate_hydroxylase_transcriptional_activator_OS=Achromobacter_aegrifaciens_OX=1287736_GN=pobR_4_PE=4_SV=1~~~tr|A0A6S7AJ39|A0A6S7AJ39_9BURK_Pca_regulon_regulatory_protein_OS=Achromobacter_deleyi_OX=1353891_GN=pcaR_2_PE=4_SV=1~~~tr|A0A7D4HTU8|A0A7D4HTU8_9BURK_IclR_family_transcriptional_regulator_OS=Achromobacter_pestifer_OX=1353889_GN=FOC84_15690_PE=4_SV=1…
3	n1175	1	0	39	1	15	0	0	3.78127e-08	0.00047463	0.706187	6.25023	CAAGCGGCTACAAGAGCGCGCGCCAAAAAACGATTTGTGCGTCGAAATGGATTGCACAATCCAAAACGATTGCCG	75	tr|A0A6S7F9P4|A0A6S7F9P4_9BURK_Uncharacterized_protein_OS=Achromobacter_insolitus_OX=217204_GN=LMG6000_04372_PE=4_SV=1~~~tr|A0A4Q1HHN3|A0A4Q1HHN3_9BURK_FAD/NAD(P)-binding_oxidoreductase_OS=Achromobacter_aloeverae_OX=1750518_GN=C7R54_18475_PE=4_SV=1
3	n1192	1	0	39	1	15	0	0	3.78127e-08	0.00047463	0.706187	6.25023	GATCTTCTCGGCAAAGATGCGCGTGCAGCCTGCGGCGTGCAGCTCGGCGCGTTGGTTGGTCAAGTCCTGGTCGTCGGTGCTGACGCGGGCATATCCCAGCAGCAGGCCAGCGGCGGCGCTCTTGTCTTTCATGGCGTAATGTCTCCGGTTCTAGTCGCAAGTATTCTATTTCATGCAACTAAAACACGCGACAAAAAACGCCAGGGAAAGGGCAGGGTGGCATGTCGTTTTCAGAAGACGGCTGCACTGAAC	252	tr|T2K1B9|T2K1B9_ACHDE_Putative_resolvase_OS=Achromobacter_denitrificans_OX=32002_GN=pinE_PE=3_SV=1~~~tr|A0A0D4ZZY9|A0A0D4ZZY9_9BURK_Resolvase_OS=Achromobacter_sp._LM16_OX=1449778_GN=pLM16A1_p5_PE=3_SV=1~~~tr|A0A193PMV3|A0A193PMV3_ALCXX_Resolvase,_N-terminal_domain_OS=Alcaligenes_xylosoxydans_xylosoxydans_OX=85698_PE=3_SV=1~~~tr|A0A2N8K8I1|A0A2N8K8I1_9BURK_Recombinase_family_protein_OS=Achromobac…
3	n1306	1	0	39	1	15	0	0	3.78127e-08	0.00047463	0.706187	6.25023	CGCCTGCAGGGGAGCGTTCGGCCTAAAAAATACAGACCCCAAGGTGAAAATATGGACCAGT	61
3	n1331	1	0	39	1	15	0	0	3.78127e-08	0.00047463	0.706187	6.25023	TCAAGCTCACGGATATGCTCCTTTTGTCTCCGCTGGCGATGCCCGTCACCCTTGGCGTGTCGGGCATCTTTAAATTCTTTATAGAGAATAATATTCTCGTTAAAAAATATAATAGCCAGCGTTCATTGATGCGTCAATCATCGGATCAGGCGGTTTTGTCCTTGACAAGCCGGAGGGTCAATCCTAGACTTTATTCGCTATAAAGATAAAT	211	tr|A0A0M7LUV8|A0A0M7LUV8_9BURK_Acyl-CoA_dehydrogenase,_short-chain_specific_OS=Achromobacter_aegrifaciens_OX=1287736_GN=ERS370000_05253_PE=3_SV=1~~~tr|A0A6S7CF58|A0A6S7CF58_9BURK_Acyl-CoA_dehydrogenase_OS=Achromobacter_anxifer_OX=1287737_GN=acdA_2_PE=3_SV=1~~~tr|A0A6S7E5N0|A0A6S7E5N0_9BURK_HTH_tetR-type_domain-containing_protein_OS=Achromobacter_pulmonis_OX=1389932_GN=LMG26788_04093_PE=4_SV=1
3	n1334	1	0	39	1	15	0	0	3.78127e-08	0.00047463	0.706187	6.25023	TTGACCAGCTTGAAGATCGCGTGCGTCTCGGCCCTGTCCAGGCGATCGATGTCGTCGATGAGAATGACGAGCCTTTTGCCGCTTTTGAGTAGCAATTCATCGATCTCGTCCTTCAGTTCATCAAGGCCGTCCTTCGATAAGGCCTCTCCGAGATTCTTAGCAGCCTCTCCAGGGTTGATCTCCACGCCTGGCACCGCTACCGATACCACCGACAGAAGTCCGCCGTACTTTCCCAATAGCGCGGCCGCCCGCTTTCTAAGTGCAGGCTCCTTGCCCAGCCCTTTGGCCAGGGTCGCAAAGAAACCACGTAGGAGCGCATCCTCGGACGGAAAGTGCCACGGGTTGAATCGTATTGCTATTGAGTTCTGATGAAGACCAAGCGATTCCTCCATCATTTTG…	1998	tr|A0A6N0JWQ1|A0A6N0JWQ1_ACHDE_NTPase_KAP_OS=Achromobacter_denitrificans_OX=32002_GN=FOC81_31610_PE=4_SV=1~~~tr|A0A848NAX3|A0A848NAX3_9BURK_NTPase_KAP_OS=Achromobacter_ruhlandii_OX=72557_GN=HGQ98_02395_PE=4_SV=1~~~tr|A0A0L8EVP7|A0A0L8EVP7_9BURK_NTPase_KAP_OS=Achromobacter_sp._DMS1_OX=1688405_GN=AD428_00305_PE=4_SV=1~~~tr|A0A0M7M4X5|A0A0M7M4X5_ALCXX_Predicted_P-loop_ATPase_OS=Alcaligenes_xylosoxyd…
3	n1346	1	0	39	1	15	0	0	3.78127e-08	0.00047463	0.706187	6.25023	ACTGGCGCTGCTGTCCATCCTCGGCGGCGCTTTCCGCAAAAAATAGAAATCGGACCCAAGACACCACACAATCCTCGCG	79	tr|A0A7Y4K709|A0A7Y4K709_9BURK_UPF0391_membrane_protein_HLG70_13040_OS=Achromobacter_deleyi_OX=1353891_GN=HLG70_13040_PE=3_SV=1~~~tr|A0A1D8I5R2|A0A1D8I5R2_9BURK_UPF0391_membrane_protein_CV751_03135_OS=Achromobacter_ruhlandii_OX=72557_GN=HGQ98_12130_PE=3_SV=1~~~tr|A0A5N8A0R4|A0A5N8A0R4_9BURK_UPF0391_membrane_protein_DCR74_04980_OS=Achromobacter_sp._OX=134375_GN=DCR74_04980_PE=3_SV=1~~~tr|H0F5R9|H0…
3	n1395	1	0	39	1	15	0	0	3.78127e-08	0.00047463	0.706187	6.25023	ATTCTAGGCATTTTCCCTAGGTAAAAAATCCGTTCTTTGGTTTTTATTGATCAGATACTCA	61
3	n1416	1	0	39	1	15	0	0	3.78127e-08	0.00047463	0.706187	6.25023	GGAGTCGGGCGAAAAAATCGAAGGCGCGGCGCTCATCGGCGCCGACGGCGTGCACTCGCGC	61	tr|A0A0M7MHD1|A0A0M7MHD1_9BURK_3-hydroxybenzoate_6-hydroxylase_1_OS=Achromobacter_aegrifaciens_OX=1287736_GN=xlnD_3_PE=4_SV=1~~~tr|A0A6S7FB33|A0A6S7FB33_9BURK_3-hydroxybenzoate_6-hydroxylase_1_OS=Achromobacter_insolitus_OX=217204_GN=xlnD_PE=4_SV=1~~~tr|A0A6S7DU40|A0A6S7DU40_9BURK_3-hydroxybenzoate_6-hydroxylase_1_OS=Achromobacter_anxifer_OX=1287737_GN=xlnD_PE=4_SV=1~~~tr|A0A6J5HV63|A0A6J5HV63_ACH…
3	n1459	1	0	39	1	15	0	0	3.78127e-08	0.00047463	0.706187	6.25023	CGACATCCGCACCGGTGAAAAAATTCCCATCGACGTGCCCGACACATGCAGCAGCGCGGCC	61	tr|A0A0Q8BUY9|A0A0Q8BUY9_9BURK_Uncharacterized_protein_OS=Achromobacter_sp._Root565_OX=1736564_GN=ASD71_06865_PE=4_SV=1~~~tr|A0A1N7R6R9|A0A1N7R6R9_9BURK_Lactate_permease_OS=Achromobacter_sp._MFA1_R4_OX=1881016_GN=SAMN05428937_4729_PE=4_SV=1~~~tr|A0A7D4IMK3|A0A7D4IMK3_9BURK_Uncharacterized_protein_OS=Achromobacter_pestifer_OX=1353889_GN=FOC84_30120_PE=4_SV=1~~~tr|A0A6S6Z4S4|A0A6S6Z4S4_9BURK_Unchar…
3	n1536	1	0	39	1	15	0	0	3.78127e-08	0.00047463	0.706187	6.25023	GGGCTCGCCGATCAGCACCGGGTTGTTCTTGCGTCGGCGGGCCAGAACCTCGATGGTCGTTTCGATTTCCTTGTCGCGGCCGATAACGGGATCGAGCTTGCCGCGCCGAGCCAGATCACTGAGATCGCGCGCGTACTTGTCGAGTGTTGGCGTGGTGGAACGCCCTTCGACGGTGCCCTCCTCGGCGCCCTTGCCGACCACTTTGACCGTCTTTTGCCGAAGCGCATGCGACGATAGCCCGTACTTCCGCAGCAACTCGCCCGCGAATCCGTCTTCCTCTTCAACGAGCCCGATCAGGATGTGCTCTGGCCCGACATAACTGTGGCCGAGCTCCCGCGACGCGGTGAGCGCATTCTCCAGCGCGCTCTTTGCGCGCGGCGATACGCCGATGCGTCCCTC…	12022	tr|A0A109Q4S0|A0A109Q4S0_9PSED_Histidine_kinase_OS=Pseudomonas_monteilii_OX=76759_GN=APT63_14210_PE=4_SV=1~~~tr|A0A2S8VHJ9|A0A2S8VHJ9_9BURK_LysR_family_transcriptional_regulator_OS=Achromobacter_sp._MYb9_OX=1827284_GN=CQ050_07235_PE=3_SV=1~~~tr|A0A2I8DRS1|A0A2I8DRS1_9BURK_LysR_family_transcriptional_regulator_OS=Achromobacter_sp._AONIH1_OX=1758194_GN=C2U31_29990_PE=3_SV=1~~~tr|A0A5N7ZNX6|A0A5N7ZN…
3	n1583	1	0	39	1	15	0	0	3.78127e-08	0.00047463	0.706187	6.25023	CCCTTTTTAGCGGCTAAAACGCCAAGGGAAAAAATGGCGATCTACCACTTGAACACGCACACGATAGGACGGGCGGCCG	79	tr|A0A0D5A100|A0A0D5A100_9BURK_Conjugal_transfer_protein_TraA_OS=Achromobacter_sp._LM16_OX=1449778_GN=pLM16A1_p14_PE=3_SV=1~~~tr|T2K1B0|T2K1B0_ACHDE_Conjugal_transfer_protein_TraA_OS=Achromobacter_denitrificans_OX=32002_GN=traA_PE=3_SV=1~~~tr|A0A193PMW1|A0A193PMW1_ALCXX_Conjugal_transfer_protein_TraA_OS=Alcaligenes_xylosoxydans_xylosoxydans_OX=85698_GN=traA_PE=3_SV=1
3	n1752	1	0	39	1	15	0	0	3.78127e-08	0.00047463	0.706187	6.25023	CAATAAAACCTTAGGATGCCCCGGTCATCCGGATTTCCCAGAGTGTGCCGATATGCCCACCGCAAAAAAGCCCGCCACCGATGCCGCACCGCGCAAGCGTGGCCGTCCACCCCGGGTCGAGTCGCCGATCAACGGTGAAGCCACGCTCAGCCGGGCTGCCATCATCGAACGCGCGATCGCGCTGGCACGCGAAACCTCGCTGGATCAGATCTCCATGGTGCAACTGGCGCGCGACTTCGGCGTCGCGCCCGGCCTGATCCATTACTACTTGGGCGGGCGCGACAAATTGATATCGGGCGTGCTCAACAACTACTACCGGGAGCGGCTGGCACGGATGCCGGCGCTGACCGGCGACTGGCGCGCCGACATCGAAACCATCGCGCGAGTCAGCCTGGCCTT…	429	tr|A0A658AG55|A0A658AG55_ALCXX_TetR_family_transcriptional_regulator_OS=Alcaligenes_xylosoxydans_xylosoxydans_OX=85698_GN=DAI43_05620_PE=4_SV=1~~~tr|A0A6S6YT02|A0A6S6YT02_9BURK_HTH_tetR-type_domain-containing_protein_OS=Achromobacter_pestifer_OX=1353889_GN=LMG3431_02210_PE=4_SV=1~~~tr|A0A6S7DVB0|A0A6S7DVB0_9BURK_HTH_tetR-type_domain-containing_protein_OS=Achromobacter_anxifer_OX=1287737_GN=LMG268…
3	n1823	1	0	39	1	15	0	0	3.78127e-08	0.00047463	0.706187	6.25023	TCGGCGCGAATGCGGCCTGCTGCCGGTCCAGCGGCTGCAGCGAACCCGCCTTGACCTTGCCGCGGGCATCCTGCTTGGCGGCGAGCAAGGCGCGCGCTTGCTGGTCGATGCGCCGCACACGCTCGACCTGCGCGGCACGATACTTATCGAGAAACGCCTGGTCGTACCGCGCCTGCCCCGTCCGCGCGTCATAGCCGTTCTCGGCGCTGAACGGATCCAGCGCCGGATCGGTACGCATCGGATCGGCTTCGTCAACGACCGAGGGATCCAGACCAGACATGAGCAGCCTGCCTTGCCCCGGATGCGGCGACAGCAACACCAGTCCGTCCACCACCGGCATGGCGAGTTCGTTCAGCTTGGTGGGGCGGCCGGCAGGCGTTTTGCCGATACGGGAATCCG…	1028	tr|A0A6S7DVA4|A0A6S7DVA4_9BURK_Uncharacterized_protein_OS=Achromobacter_anxifer_OX=1287737_GN=LMG26858_01575_PE=4_SV=1~~~tr|A0A658AEW0|A0A658AEW0_ALCXX_Alpha/beta_hydrolase_OS=Alcaligenes_xylosoxydans_xylosoxydans_OX=85698_GN=DAI43_05645_PE=4_SV=1~~~tr|A0A6S7F4I8|A0A6S7F4I8_9BURK_Uncharacterized_protein_OS=Achromobacter_insolitus_OX=217204_GN=LMG6000_00403_PE=4_SV=1~~~tr|A0A6S6YUC3|A0A6S6YUC3_9BU…
3	n1833	1	0	39	1	15	0	0	3.78127e-08	0.00047463	0.706187	6.25023	ACCTGATGCGCTGCGAAGTGCACGACGGCCGGCGCTACTACTACTTCTGCGGGCGGATCAAGGACGTGGTGGACCGCGGCGGCGAAAAGATCAACGCCGAGGAGGTCGAGAACGTGCTTAACGGGCATCCGGCCATCCTGGCCTCGGCCGTGGTGGCCATGCCGGATCCGGTCTACGGGGAACGCGTCTGTGCCTTCGTGATAGCTCGCCTCCCTGGCGCGGCGCTCACGCTACCCATGGTCTGCGGCTATCTGCAAGAGGTCGGGCTAGCGAAGTTCAAGTGGCCTGAACGCCTGGAAGTCGTGGACGAATTTCCCCTTTCCGCATCTGGAAAGCTGAGCAAAAAAGCGTTGCGCGGCCAGATCGCCGCCACGCTCGAGGCCGAACGCGGCCAGCAAA…	625	tr|A0A6S7F757|A0A6S7F757_9BURK_Long-chain-fatty-acid--CoA_ligase_OS=Achromobacter_insolitus_OX=217204_GN=LMG6000_01634_PE=4_SV=1~~~tr|A0A658AK22|A0A658AK22_ALCXX_AMP-dependent_synthetase_OS=Alcaligenes_xylosoxydans_xylosoxydans_OX=85698_GN=DAI43_05640_PE=4_SV=1~~~tr|A0A6S7DGL2|A0A6S7DGL2_9BURK_2,3-dihydroxybenzoate-AMP_ligase_OS=Achromobacter_anxifer_OX=1287737_GN=dhbE_1_PE=4_SV=1~~~tr|A0A6S7EVJ9…
3	n1838	1	0	39	1	15	0	0	3.78127e-08	0.00047463	0.706187	6.25023	GCGCGGATCAAAAAAGCGGAAAAAGCACGGGCCCTGTCCCGCGATGTCGACGATCATCCGC	61	tr|A0A0M7FC49|A0A0M7FC49_9BURK_DUF4123_domain-containing_protein_OS=Achromobacter_aegrifaciens_OX=1287736_GN=ERS370000_01689_PE=4_SV=1~~~tr|A0A658ABG5|A0A658ABG5_ALCXX_DUF4123_domain-containing_protein_OS=Alcaligenes_xylosoxydans_xylosoxydans_OX=85698_GN=DAI43_16105_PE=4_SV=1~~~tr|A0A7D4E1D6|A0A7D4E1D6_9BURK_DUF4123_domain-containing_protein_OS=Achromobacter_pestifer_OX=1353889_GN=FOC84_17370_PE=…
3	n2095	1	0	39	1	15	0	0	3.78127e-08	0.00047463	0.706187	6.25023	AACCGTCGGTAAGCACCCTTGTCAATTCGGACATCGACGGAGTGCCTGCCCCATCCGCGCCCGCACGCGGACGGACAGCTTAAGTTGCATGACTCTCCCCTGCGCGGCGCTACTGAGCCTTACCGCCGGCCGGAACTTCAGCCAGATCGTGTTTGGCCGCCGCCAGCACCGCCGGATCCAGCTTCTCGGAATACTTGCGTACGACCGGCAGCGTCTTCTGTCTGATCAACGCCAATTCGGAGGCTGGAATCTCGTTGATCACCATGCCGTCCTGTTTCAGCTGGTCCAGCACTTTGGCAGCCTCCTCGCGGACCAGCCGCCGCTGGAACGTGGCAACCTCGCGCGCCGCGCCGCGTACGATGCCGCGGTCGGCTTCGGAAAGCCCATCCCACCATTTCT…	7024	tr|A0A658AC32|A0A658AC32_ALCXX_Gluconate_5-dehydrogenase_OS=Alcaligenes_xylosoxydans_xylosoxydans_OX=85698_GN=DAI43_11380_PE=4_SV=1~~~tr|A0A658AC75|A0A658AC75_ALCXX_L-dehydroascorbate_transporter_large_permease_subunit_OS=Alcaligenes_xylosoxydans_xylosoxydans_OX=85698_GN=DAI43_11395_PE=4_SV=1~~~tr|A0A658AEH4|A0A658AEH4_ALCXX_LacI_family_transcriptional_regulator_OS=Alcaligenes_xylosoxydans_xyloso…
3	n2191	1	0	39	1	15	0	0	3.78127e-08	0.00047463	0.706187	6.25023	CCTAGTAGTCCGCAGAAAAACACCGCAACGTCCCGAAAAATCGAGCCATCGGCCCGAGGGTCAGT	65	tr|A0A7X9W6J2|A0A7X9W6J2_9BURK_O-antigen_ligase_family_protein_OS=Achromobacter_sp._Bel_OX=2727415_GN=HG262_25695_PE=4_SV=1
3	n2340	1	0	39	1	15	0	0	3.78127e-08	0.00047463	0.706187	6.25023	TGAAAAACAGGCAACGGCAAGATCGATGCATGCCGCCGCCCCATGCCCCATCATCGGCGGC	61	tr|A0A1R1K181|A0A1R1K181_ALCXX_Uncharacterized_protein_OS=Alcaligenes_xylosoxydans_xylosoxydans_OX=85698_GN=BIZ92_02130_PE=4_SV=1~~~tr|A0A0D6IWF1|A0A0D6IWF1_ALCXX_Response_regulator_transcription_factor_OS=Alcaligenes_xylosoxydans_xylosoxydans_OX=85698_GN=ompR_6_PE=4_SV=1~~~tr|A0A173DTD2|A0A173DTD2_9BURK_Two-component_system_response_regulator_OS=Achromobacter_ruhlandii_OX=72557_PE=4_SV=1~~~tr|A0…
3	n2559	1	0	39	1	15	0	0	3.78127e-08	0.00047463	0.706187	6.25023	AGGGATTGCGCACATCGCGGCTGACCGCCGACAGGAACCGGGTCTTCATGTCGTTGATGCGCTCGGCGCGGCGGCGCGCGCTTACCGAATCGTCCAGCGACTGGCTATGGCCCAGAAAGTACATGCCCATGGAGAGCAGTCCTATGACCTGATCTTCAGCGCCTCGCAACGGAAAAACCCGTGCCTGGATTGGCACCTTGACGCCGGCGACCCCCATCAACTCATGGCCGAAGTCATAAGTGCGCGGTTCGCCGCTGGCCACCGCAGCCTGGAATTCCCGCAAGATTAGGGCAAGTTCGGGCGACACAGGGATCTGATCCTTCTCCGCGCCGGACAGAAATCCCAAATCGAGGTACTCGGGCCTGATCCATCCATTCCTGATGAGGATGTCGGCAATGC…	1004	tr|A0A6S7A766|A0A6S7A766_9BURK_Histidine_kinase_OS=Achromobacter_pestifer_OX=1353889_GN=bvgS_2_PE=4_SV=1~~~tr|A0A7Y4K4R0|A0A7Y4K4R0_9BURK_Histidine_kinase_OS=Achromobacter_deleyi_OX=1353891_GN=HLG70_07555_PE=4_SV=1~~~tr|A0A2N8KM32|A0A2N8KM32_9BURK_Histidine_kinase_OS=Achromobacter_pulmonis_OX=1389932_GN=C1I89_09960_PE=4_SV=1~~~tr|A0A6S7D409|A0A6S7D409_9BURK_Histidine_kinase_OS=Achromobacter_anxif…
3	n2614	1	0	39	1	15	0	0	3.78127e-08	0.00047463	0.706187	6.25023	TTCCGAAAAACCTGAGCGTCAGTTCGATCCAGGCGAATTGTTCGGCGCTTCCCGAAGTTCTAGACTGGATTCGTACATG	79
3	n2706	1	0	39	1	15	0	0	3.78127e-08	0.00047463	0.706187	6.25023	ATTGATGCGACGGGCGGGCAGCGGCTGTAGGATTGGCTGGCCGCATCATCGTTGATCGGCAGCGCATGTTCCGCTCGAAGCCAGCCCAAGCATTCCCAAGTCAAATACCGACCCAAAAACGGTCGTAGACATGCTCAGGGATATCCCTGAAAATCGCCAATTCTCCGGGAGTCAGAGTAAGGGAATGAGGTGGAAATTCCAGAGCTTGAGCAAATCGACGCCGTATTATCGGGCCGCGTGTGGAACTTGGTCCATCGCTACTGTGGTGGCGCCTGGAGCCGTCTGCCACCGAGTTGGACTGTTTCGTTTTCGGAAATTTCTGCGGAAGCTCGGCGGCGCGGCTTGGGCTGCTTTATCACTACGAAGCCAAACGATGATGGCAATTGGCTAGTGGAAACT…	2579	tr|A0A0Q8XAA2|A0A0Q8XAA2_9BURK_Gluconate_5-dehydrogenase_OS=Achromobacter_sp._Root83_OX=1736602_GN=ASE30_05810_PE=4_SV=1~~~tr|A0A0M7CFT4|A0A0M7CFT4_9BURK_Gluconate_5-dehydrogenase_OS=Achromobacter_aegrifaciens_OX=1287736_GN=gno_1_PE=4_SV=1~~~tr|A0A7D4E2F0|A0A7D4E2F0_9BURK_SDR_family_oxidoreductase_OS=Achromobacter_pestifer_OX=1353889_GN=FOC84_05685_PE=4_SV=1~~~tr|A0A424WJ47|A0A424WJ47_ALCXX_SDR_f…
3	n2784	2	0	39	2	15	0	0	8.96014e-06	0.0205978	0.414161	4.78716	CCTAATCATCGACCGCACCAGGAACGGCCGGGAAGCGGCCAAGGCCCGAGGCGTGAAGTTCGGCCCGCGCCCTACCCTCACCCCGGCGCAGATCGAGCACGCCCGCGAGCTGATCGACCGTGACGGCCGGACGGTGAAGGAAGCGGCCGAGCTGCTGGCCGTGCATCGTTCGACCCTTTACCGGGCGCTGGCGCGTGGCGAGGAAGTGACAAAGACCGAGGCCCGCCGACGTGGTGCGTTCGCCGAGGACGCATTGAGCGAAGCCGACGCCCTGGCGGCCGTCGATGATGAACGCCAGGAAGAAGGCCCCGCGTTCCTCGATGGCGACGGCCCGGCCGCCGACCTGCCGCCGCCGCCGTATCGAACGCAGAGCCTGCCGCAAATCCTGGCGGCCCTCCC…	2899	tr|T2K1B9|T2K1B9_ACHDE_Putative_resolvase_OS=Achromobacter_denitrificans_OX=32002_GN=pinE_PE=3_SV=1~~~tr|A0A0D4ZZY9|A0A0D4ZZY9_9BURK_Resolvase_OS=Achromobacter_sp._LM16_OX=1449778_GN=pLM16A1_p5_PE=3_SV=1~~~tr|A0A193PMV3|A0A193PMV3_ALCXX_Resolvase,_N-terminal_domain_OS=Alcaligenes_xylosoxydans_xylosoxydans_OX=85698_PE=3_SV=1~~~tr|A0A2N8K8I1|A0A2N8K8I1_9BURK_Recombinase_family_protein_OS=Achromobac…
3	n2838	1	0	39	1	15	0	0	3.78127e-08	0.00047463	0.706187	6.25023	ACGAGCTTCTGTTCATAGAAGCCGTCGCCCGAACCGGCGCCGTGAAGAAACGTGTCAGACTAAATTCTCAGCTATGGAAAATTTAGTCCAGTAAAAATTTTACGGAAAATTCAGATTGAAGTTTTTTTGTCTATTTACATAAAAATCACTCTACAAACTGGAACTGCGGAACTCTGTAGGCATGATTCGTCGATTTTTTTGGATCAAAAAAAACATTGTCGTCCAAATGACTCTTGACGCGCTTTCGCACCACATCCACCTCATAAAACCGCTCATGCAAGTCAAATATAGATTCTGACAACTGTATGTAAACCGACTCGTCTCCCCAAGCTTCAACCTTGTACGCTGGCGCCGAAAGCAGTCTTTCTCGTCCAATAAGTTTCACATAGGCAGGTCCAA…	3983	tr|A0A0M9IIT3|A0A0M9IIT3_ALCXX_Filamentous_hemagglutinin_OS=Alcaligenes_xylosoxydans_xylosoxydans_OX=85698_GN=fhaB_1_PE=4_SV=1~~~tr|A0A854PTL5|A0A854PTL5_9BURK_Filamentous_hemagglutinin_OS=Achromobacter_sp._KAs_3-5_OX=1915388_GN=BMR85_028550_PE=4_SV=1~~~tr|A0A6S6YJZ9|A0A6S6YJZ9_9BURK_Haemagg_act_domain-containing_protein_OS=Achromobacter_pestifer_OX=1353889_GN=LMG3431_00536_PE=4_SV=1~~~tr|A0A3Q9K…
3	n3074	1	0	39	1	15	0	0	3.78127e-08	0.00047463	0.706187	6.25023	CCCATCGCGCGCTGGACGCGGTATCTGGAAAAACGCCATGAGCATTATTGAATTCGAGGCGC	62	tr|A0A0M7I4N1|A0A0M7I4N1_9BURK_Histidine_transport_system_permease_protein_hisQ_OS=Achromobacter_aegrifaciens_OX=1287736_GN=hisQ_PE=3_SV=1~~~tr|A0A7X9VXU5|A0A7X9VXU5_9BURK_Amino_acid_ABC_transporter_permease_OS=Achromobacter_sp._Bel_OX=2727415_GN=HG262_03845_PE=3_SV=1~~~tr|E3HWZ0|E3HWZ0_ACHXA_Amino_ABC_transporter,_permease_protein,_3-TM_region,_His/Glu/Gln/Arg/opine_family_domain_protein_8_OS=Ac…
3	n3180	1	0	39	1	15	0	0	3.78127e-08	0.00047463	0.706187	6.25023	TCACCCTTTGACTCATGACCGATGGGCTACACCGGATGATCCGGAGTTCGTCACCGTACGGTTTGCTGCGCTTCGGAAAATGGAACGGGGCTGCTCCGCGATTTGGGCTATTGCTCGGATCGTGGGGAATAGTGCGAATGAGTCTGAGGCTAGCGGCTCGCAACCGCCCGACATGTGGGTCATGTCCAATTTGATTGGAGGGATTGAGAGCCTTTGCGACCATTTGGCGGATCTTGTCGCGTCGACTATCGACGAGTCCAATCTTGAGGAAAATGTGTCAGGCGAAGATTGACTGCATGCGGTAGACGAAATTGTAGTCTGACGCCTTTTTCATTGATGGGCACCACAGTTACTTGATCGCACAGTGGCGAGCCGATTACCTTCCATCAAAATTCAAGA…	8853	tr|A0A2S5GUZ6|A0A2S5GUZ6_9BURK_ABC_transporter_ATP-binding_protein_OS=Achromobacter_spanius_OX=217203_GN=C4E15_09135_PE=4_SV=1~~~tr|A0A6S7DB27|A0A6S7DB27_9BURK_High-affinity_branched-chain_amino_acid_transport_ATP-binding_protein_LivF_OS=Achromobacter_anxifer_OX=1287737_GN=livF_21_PE=4_SV=1~~~tr|A0A5N7ZS48|A0A5N7ZS48_9BURK_ABC_transporter_ATP-binding_protein_OS=Achromobacter_sp._OX=134375_GN=E260…
3	n3233	1	0	39	1	15	0	0	3.78127e-08	0.00047463	0.706187	6.25023	CTATCCCGAGGGTACCGCAGGCTTGCTGCAGGTCGTGGCGGCCGGTACGTCGTTTGTGTACCAGCGCTATGTCACCACAGCACGCAGGAGCTACTGGCGGACGCGCGTCGGCAGTGTGTGGACTGAGTGGGTGCGAATGCTGGACGCGTCGATGCTGGGGGCTGCAAATGGCCTTGCTTCGCTCGGCACCGACAGCAAGATCCCGCGCGAACAGCTGCCGGTCATGACGGCGCAGGTTATCGTAGCCGGCACCGACGCCAACGCGGTCACCGACCCAGGCTCCTACTACATCAACAGCGACGCCGACGCGACGCTGGATCTCAACTGGCCCGAGTTGCGGGCGGGCACGCTGGTGGTGGAGCGCGCTGGCGCGGGGAACGCGCAGGTCACCCAGACCTA…	2253	tr|A0A2N8KDN2|A0A2N8KDN2_9BURK_Uncharacterized_protein_OS=Achromobacter_pulmonis_OX=1389932_GN=C1I89_22175_PE=4_SV=1~~~tr|A0A514CUT2|A0A514CUT2_9CAUD_Uncharacterized_protein_OS=Achromobacter_phage_vB_AxyS_19-32_Axy14_OX=2591050_GN=Axy14_024_PE=4_SV=1~~~tr|A0A514CTK8|A0A514CTK8_9CAUD_Putative_tail_fiber_protein_OS=Achromobacter_phage_vB_AxyS_19-32_Axy06_OX=2591049_GN=Axy06_023_PE=4_SV=1~~~tr|J4QKB…
3	n3401	1	0	39	1	15	0	0	3.78127e-08	0.00047463	0.706187	6.25023	GCCGGCGCCGATCTGGTTGACCGCGCCGCTACCGGAGATCAGGCCAGGAAATGCCACGGTATCGGAGCGATTGAAGGCCAGCGCCCCGTTGTTGGTCACGTTGCCCAGGATGGCGCCGGAGCCGCCGCCGTTGCCCAGTTGCAGCGTGCCAGCAGAAATTGTGGTGCCGCCGGTGTAGGTATTGTCGCCCGTCAGCACGGTGGTGCCGGTGCCGATCTGGCTGACCGAGCCGCTGCCGGAAATCTGGCCGGCGAGGGCCAGAGTGTTGGAACGATTGAACACCAGCGCTCCATCGTTCGCCACATTGCCGACGATGGCGCCGGTGGTGCCGCCATTGCCCAGTTGCAAGGTGCCAGCCGTGATGGCGGTGCCGCCGGTATAGGTGTTGTTGGCCGTCAG…	6415	tr|A0A2I8DBV6|A0A2I8DBV6_9BURK_Autotransporter_domain-containing_protein_OS=Achromobacter_sp._AONIH1_OX=1758194_GN=C2U31_00035_PE=4_SV=1~~~tr|J4YF05|J4YF05_9BURK_Uncharacterized_protein_OS=Achromobacter_marplatensis_OX=470868_GN=QWC_23485_PE=4_SV=1~~~tr|A0A2S8VHM6|A0A2S8VHM6_9BURK_Uncharacterized_protein_OS=Achromobacter_sp._MYb9_OX=1827284_GN=CQ050_07410_PE=4_SV=1~~~tr|A0A7X9ZC95|A0A7X9ZC95_9BUR…
3	n3471	1	0	39	1	15	0	0	3.78127e-08	0.00047463	0.706187	6.25023	TAGTGCAGGATAGGCTGTCGCCGGTTTTTGCATCACAAAAACGTGAAGCCGCATAAGACCAATAGCGAGGCCTAAACAAGGAGACCATCGTGGAAATAGCTAAATTTTCGTCTTTTGAAGAAGAACCGCTTCAATCCGATTGCTTTCCGCCTAGAACGAATAGCGGACCATCTGTGGTAAATGGTCGCTTCAAGCCCGCTATACATTCGTTCTGTGCACGATTTTGAGGCAAGCACAGATGTCACCAAATAGCAGCGCTACTTCTGACATTCGGCATCAAGAACTGGCACTGTCACAAGACAGGGAACATATCGGAAAGCGTGACACAGCCCCTATGGAGCGTGTCGAGATACTTGCGTTCCCCATCGACGTACCTACTGTGCTAAAGCACCTGCATAG…	3760	tr|A0A5H2Q6N4|A0A5H2Q6N4_9CAUD_Bifunctional_3\'-5\'_exonuclease/DNA_polymerase_OS=Achromobacter_phage_vB_Ade_ART_OX=2292880_GN=ART_00059_PE=4_SV=1~~~tr|A0A7T4B1K3|A0A7T4B1K3_9BURK_RNA-directed_DNA_polymerase_OS=Achromobacter_deleyi_OX=1353891_GN=I6I07_25860_PE=4_SV=1~~~tr|A0A176XX22|A0A176XX22_ALCXX_DNA_polymerase_I_OS=Alcaligenes_xylosoxydans_xylosoxydans_OX=85698_GN=polA_PE=3_SV=1~~~tr|A0A811GY…
3	n3503	1	0	39	1	15	0	0	3.78127e-08	0.00047463	0.706187	6.25023	GCGCCTGCTGCCCGGCAGCTTCATGACCATTCGCCAGGCCATCGGCTTGCCGCGCGGGCGCGGCGAAGCGGCGCAGAAGCTCCTGGCCACCTTCGTAGAGGACATGAAACGCAGCGGATTCGTTGAGCAATCCTTGGCTCGCCATGGTATCGAGGGCGCGGCCGTCGCGCCAACAAGTCGATAAAGGAGGGGATGTCTGATAAACCCCGATGAGAGGGACCAAACGTCGAAGTTCATGTAACTTCGAACCCCAAGCGCTATCTAAATCGAAGGCTGAGTGAAAGTCGATTCATGCACTTGGGCCAGCACGGTTCGTTGACCATGGAGCTCTTGGACGACATGTTCATTGAACTTAGGCATGCAATGTGTCGACCAGATTGCGTGGGCGTCGGAGCAGCG…	7594	tr|A0A6S7DSX0|A0A6S7DSX0_9BURK_AAA_12_domain-containing_protein_OS=Achromobacter_dolens_OX=1287738_GN=LMG26841_03729_PE=4_SV=1~~~tr|A0A0D6IRG5|A0A0D6IRG5_ALCXX_DNA_helicase_OS=Alcaligenes_xylosoxydans_xylosoxydans_OX=85698_GN=DY367_02760_PE=4_SV=1~~~tr|A0A3S9Z2N5|A0A3S9Z2N5_9BURK_DNA_helicase_OS=Achromobacter_spanius_OX=217203_GN=ELS24_28425_PE=4_SV=1~~~tr|A0A6S7FDG3|A0A6S7FDG3_9BURK_DNA_helicase…
3	n3507	1	0	39	1	15	0	0	3.78127e-08	0.00047463	0.706187	6.25023	CTATAAAAATATAGCATTTCAGTTATCACCGGGATCTGGTTAGGATGGCGCCGTCGCCCTC	61	tr|A0A0X8P4T8|A0A0X8P4T8_ALCXX_Intracellular_growth_attenuator_igaA_OS=Alcaligenes_xylosoxydans_xylosoxydans_OX=85698_GN=AL504_30165_PE=3_SV=1
3	n3607	1	0	39	1	15	0	0	3.78127e-08	0.00047463	0.706187	6.25023	TTGGTCCATGTCGGTTCCGGAAAAATAGGGATCGGCCAACACATAGTCCTCCCCGCTTTTT	61	tr|A0A424WAK1|A0A424WAK1_ALCXX_Uncharacterized_protein_OS=Alcaligenes_xylosoxydans_xylosoxydans_OX=85698_GN=DY367_17875_PE=4_SV=1~~~tr|A0A658A1W8|A0A658A1W8_ALCXX_Uncharacterized_protein_OS=Alcaligenes_xylosoxydans_xylosoxydans_OX=85698_GN=DAI43_37520_PE=4_SV=1~~~tr|A0A0M7GW25|A0A0M7GW25_9BURK_Uncharacterized_protein_OS=Achromobacter_aegrifaciens_OX=1287736_GN=ERS370000_02362_PE=4_SV=1~~~tr|E3HI8…
3	n3756	1	0	39	1	15	0	0	3.78127e-08	0.00047463	0.706187	6.25023	GGATCATGGCCAGTACATCATGGGTCCCGAAGTCAAGGAGTTGGAGACCGCTCTCTGCGACTACACGGGCGCCAAGCACTGCATTACTGTTTCTTCCGGCACCGAAGCGCTACTGATTTCGCTCATGGCGCTGGGCGTTTCCGCCGGCGATGAAGTCATTACCACCTCGTTTACCTTTGTAGCAACCGCGGAAGTCATCGCCCTGCTGGGCGCCGTTCCCGTTTTTGTCGACGTCGAACTGGATACCTGCAACATTTTGGCCTCAGAGATCGAAGCCAAGATCACTCCGCGCACCAAGGCCATTATCCCCGTCTCGCTTTATGGACAGTGCGGAGACATGGACGAAGTCAATGCTGTCGCGGACAAGCACGGCATTACGGTCATCGAAGATGCAGCGCA…	22658	tr|A0A6S7BZH9|A0A6S7BZH9_9BURK_High-affinity_branched-chain_amino_acid_transport_ATP-binding_protein_LivF_OS=Achromobacter_animicus_OX=1389935_GN=livF_17_PE=4_SV=1~~~tr|A0A176XTL8|A0A176XTL8_ALCXX_ABC_transporter_ATP-binding_protein_OS=Alcaligenes_xylosoxydans_xylosoxydans_OX=85698_GN=A7J67_05685_PE=4_SV=1~~~tr|A0A446CF42|A0A446CF42_9BURK_Bicarbonate_transport_ATP-binding_protein_CmpD_OS=Achromob…
3	n3868	1	0	39	1	15	0	0	3.78127e-08	0.00047463	0.706187	6.25023	CCGGGCCGCCCCAAGGCAAAAATCGCCCCCACGGGGGGCAGCAAGCGCCTAAGGCGCGCAG	61	tr|A0A5N7ZQ30|A0A5N7ZQ30_9BURK_Uncharacterized_protein_OS=Achromobacter_sp._OX=134375_GN=E2603_18475_PE=4_SV=1~~~tr|A0A6S7AP99|A0A6S7AP99_9BURK_Uncharacterized_protein_OS=Achromobacter_animicus_OX=1389935_GN=LMG26690_05379_PE=4_SV=1~~~tr|A0A6S7EZA5|A0A6S7EZA5_9BURK_MPT_synthase_subunit_2_OS=Achromobacter_insolitus_OX=217204_GN=LMG6000_01662_PE=3_SV=1~~~tr|A0A446D0F9|A0A446D0F9_9BURK_MPT_synthase_…
3	n3989	1	0	39	1	15	0	0	3.78127e-08	0.00047463	0.706187	6.25023	TCTTTTTTGTTCAGGAAAAATTCAGCCTGCGAAATCCCTGTCGATTGTCGAATTCATTG	59
3	n4012	1	0	39	1	15	0	0	3.78127e-08	0.00047463	0.706187	6.25023	CGATAGAAAAATTCTGATTCTTCAATCAAGAAGGTGAACCTACACTGGCGCGGTTGACGAGCCGG	65
3	n4030	1	0	39	1	15	0	0	3.78127e-08	0.00047463	0.706187	6.25023	CAAAAATTCGCGCAGCACGCAAGCCGTGGCGGCATGCGGCGCCGCGGCTTGCGGGCCCAGG	61
3	n4093	1	0	39	1	15	0	0	3.78127e-08	0.00047463	0.706187	6.25023	AGGTCGCGTGCCGCCCGGGGAAAAATTGCCCACGGAAAGCGCGCTGGCGGAGCAGTTCGGC	61	tr|A0A446CVI7|A0A446CVI7_9BURK_HTH-type_transcriptional_regulator_LutR_OS=Achromobacter_agilis_OX=1353888_GN=lutR_6_PE=4_SV=1~~~tr|A0A7Y4KCI6|A0A7Y4KCI6_9BURK_FadR_family_transcriptional_regulator_OS=Achromobacter_deleyi_OX=1353891_GN=HLG70_28140_PE=4_SV=1~~~tr|A0A0Q8X422|A0A0Q8X422_9BURK_GntR_family_transcriptional_regulator_OS=Achromobacter_sp._Root83_OX=1736602_GN=ASE30_10605_PE=4_SV=1~~~tr|A0…
3	n4245	1	0	39	1	15	0	0	3.78127e-08	0.00047463	0.706187	6.25023	CGATGATAAAAATGCCGCAACCTGCGGGGGCGGGTTCAGAAGTCCAGCGTGGCGTGGGGCC	61	tr|A0A0C5BMB9|A0A0C5BMB9_ALCXX_TrbG_protein_OS=Alcaligenes_xylosoxydans_xylosoxydans_OX=85698_GN=trbG_PE=3_SV=1~~~tr|A0A2N8K992|A0A2N8K992_9BURK_P-type_conjugative_transfer_protein_TrbG_OS=Achromobacter_pulmonis_OX=1389932_GN=trbG_PE=3_SV=1~~~tr|A0A6S7EBG1|A0A6S7EBG1_9BURK_Uncharacterized_protein_OS=Achromobacter_anxifer_OX=1287737_GN=LMG26858_04333_PE=3_SV=1~~~tr|A0A7D4ID84|A0A7D4ID84_9BURK_P-ty…
3	n4261	1	0	39	1	15	0	0	3.78127e-08	0.00047463	0.706187	6.25023	CACGCTGAGCCAGCCCCTGCTGAAAAATGCTGGCATCGATGCGAACACGGCCTCAGTCCGC	61	tr|A0A424WG57|A0A424WG57_ALCXX_TolC_family_protein_OS=Alcaligenes_xylosoxydans_xylosoxydans_OX=85698_GN=DY367_08520_PE=3_SV=1~~~tr|A0A0M7DKK3|A0A0M7DKK3_9BURK_Type_I_secretion_outer_membrane_protein,_TolC_family_OS=Achromobacter_aegrifaciens_OX=1287736_GN=ERS370000_00855_PE=3_SV=1~~~tr|A0A658AA39|A0A658AA39_ALCXX_Uncharacterized_protein_OS=Alcaligenes_xylosoxydans_xylosoxydans_OX=85698_GN=DAI43_2…
3	n4262	1	0	39	1	15	0	0	3.78127e-08	0.00047463	0.706187	6.25023	CCGGTAATGGCAGTCTTCGGTGAAAAATGCTGGCCAGTCCTCCAGCCGGTCTTCGTCCAGG	61	tr|A0A658AHL6|A0A658AHL6_ALCXX_Ring-hydroxylating_dioxygenase_subunit_beta_OS=Alcaligenes_xylosoxydans_xylosoxydans_OX=85698_GN=DAI43_11230_PE=3_SV=1~~~tr|A0A0M7JMX4|A0A0M7JMX4_9BURK_Anthranilate_1,2-dioxygenase_small_subunit_OS=Achromobacter_aegrifaciens_OX=1287736_GN=andAd_1_PE=3_SV=1~~~tr|A0A6S7CA11|A0A6S7CA11_9BURK_Anthranilate_1,2-dioxygenase_small_subunit_OS=Achromobacter_anxifer_OX=1287737…
3	n4452	1	0	39	1	15	0	0	3.78127e-08	0.00047463	0.706187	6.25023	TGGGACGGCCCGGCGGAAAAAGAAAAGCCCTCGACCGAGGGCTTTCTTGTTTGCGGAACGG	61
3	n4658	1	0	39	1	15	0	0	3.78127e-08	0.00047463	0.706187	6.25023	GCACCTGCCCGGCAAAAAGATTGTCAGCGTTACTGCATCACATGACGAGCT	51	tr|A0A2I8DBV2|A0A2I8DBV2_9BURK_Uncharacterized_protein_OS=Achromobacter_sp._AONIH1_OX=1758194_GN=C2U31_00850_PE=4_SV=1~~~tr|A0A2M9H3J2|A0A2M9H3J2_9BURK_Uncharacterized_protein_OS=Achromobacter_ruhlandii_OX=72557_GN=LMG3328_04295_PE=4_SV=1
3	n4717	1	0	39	1	15	0	0	3.78127e-08	0.00047463	0.706187	6.25023	GTCCGAGCTGAGGTGGAATGGCAATCCGTGCCGGGGGAAAAAGAGGCTTACACCGGTCTTTTGAAGCA	68	tr|A0A0M7H528|A0A0M7H528_9BURK_Filamentous_hemagglutinin_OS=Achromobacter_sp._OX=134375_GN=fhaB_3_PE=4_SV=1~~~tr|A0A6J5ACG0|A0A6J5ACG0_9BURK_Haemagg_act_domain-containing_protein_OS=Achromobacter_insuavis_OX=1287735_GN=LMG26845_02883_PE=4_SV=1~~~tr|A0A2I8DBV2|A0A2I8DBV2_9BURK_Uncharacterized_protein_OS=Achromobacter_sp._AONIH1_OX=1758194_GN=C2U31_00850_PE=4_SV=1~~~tr|A0A2M9H3J2|A0A2M9H3J2_9BURK_U…
3	n4851	1	0	39	1	15	0	0	3.78127e-08	0.00047463	0.706187	6.25023	CTCCGGCCCGAAAAAGCCCCACACCAGCAGCGTGGAGATCGCCACCAGCACCACGGCAATG	61	tr|A0A6S7F653|A0A6S7F653_9BURK_Copper-exporting_P-type_ATPase_OS=Achromobacter_insolitus_OX=217204_GN=copA_5_PE=3_SV=1~~~tr|E3HKH7|E3HKH7_ACHXA_Copper-translocating_P-type_ATPase_4_OS=Achromobacter_xylosoxidans_(strain_A8)_OX=762376_GN=AXYL_05971_PE=3_SV=1~~~tr|A0A0M7LIQ4|A0A0M7LIQ4_9BURK_Copper-transporting_P-type_ATPase_OS=Achromobacter_aegrifaciens_OX=1287736_GN=actP_4_PE=3_SV=1~~~tr|A0A7D4DXE…
3	n4886	1	0	39	1	15	0	0	3.78127e-08	0.00047463	0.706187	6.25023	GAAGGATACGTTCGATGGGTATCCGTGGGACGGGGCGAGGCTCAAGCAGGGTGGGCGCGACTAGAGATCCGCATAGCGCGGCAGCAGGTCCTGGTCCACCAGGCGCATCTCGATGCGGTTCGCCAATTCGACGTGGCTGGCGTTGTCCAGCGAAAACACTTCGTTCGCGACGCTGACGATGATGGTGCCGGTTTGTTTCTTTCCGGCAGCGGGAACGGGAATCAGAGCCTGGGCTTCCGGGACTTGCTCGGGAGTGATCACTTGGGGAAGGTAAAGCATCCAGCCGACGCCGGGTTTGTCGTCGAAAACCTGCTTTTCGTCGTAATAGCGTGGCGAGACGGCTATGTACTGCGCGACGAAGAGCTGGGCGATCGCGGCGACGATGTCCTTCACCGAGGC…	2787	tr|E3HVZ6|E3HVZ6_ACHXA_Bacterial_regulatory_helix-turn-helix_protein,_LysR_family_protein_86_OS=Achromobacter_xylosoxidans_(strain_A8)_OX=762376_GN=AXYL_02989_PE=3_SV=1~~~tr|A0A0M7I807|A0A0M7I807_9BURK_Nodulation_protein_D_2_OS=Achromobacter_aegrifaciens_OX=1287736_GN=nodD2_4_PE=3_SV=1~~~tr|A0A6S7D824|A0A6S7D824_9BURK_PCP_degradation_transcriptional_activation_protein_OS=Achromobacter_anxifer_OX=…
3	n5025	1	0	39	1	15	0	0	3.78127e-08	0.00047463	0.706187	6.25023	ATTGACGTCCGCCGTCAGCGCGAAAAAGCCGTCGACGGGGTCCCGGCCGAACGAGATGGTG	61	tr|A0A6J5CR24|A0A6J5CR24_ACHDE_GNAT_family_N-acetyltransferase_OS=Achromobacter_denitrificans_OX=32002_GN=FOC81_07730_PE=4_SV=1~~~tr|A0A6S7CXU6|A0A6S7CXU6_9BURK_Organic_hydroperoxide_resistance_protein_OhrB_OS=Achromobacter_anxifer_OX=1287737_GN=ohrB_1_PE=3_SV=1~~~tr|A0A0M7IL61|A0A0M7IL61_9BURK_General_stress_protein_17o_OS=Achromobacter_aegrifaciens_OX=1287736_GN=ohrB_2_PE=3_SV=1~~~tr|A0A658ACP6…
3	n5175	1	0	39	1	15	0	0	3.78127e-08	0.00047463	0.706187	6.25023	TCTGGATCCGGATCAAGGAAAAAGCGCCAACACGGTATCGGCCCGCTTGCGCTACGACGCG	61	tr|A0A3S4NK27|A0A3S4NK27_9BURK_Proline_porter_II_OS=Achromobacter_spanius_OX=217203_GN=proP_6_PE=4_SV=1~~~tr|A0A3S9Z4J0|A0A3S9Z4J0_9BURK_MFS_transporter_OS=Achromobacter_spanius_OX=217203_GN=ELS24_19660_PE=4_SV=1~~~tr|A0A6S7F5H7|A0A6S7F5H7_9BURK_Uncharacterized_protein_OS=Achromobacter_insolitus_OX=217204_GN=LMG6000_01450_PE=4_SV=1~~~tr|A0A7D4IDR2|A0A7D4IDR2_9BURK_Uncharacterized_protein_OS=Achro…
3	n5178	1	0	39	1	15	0	0	3.78127e-08	0.00047463	0.706187	6.25023	GTATGAAATAAAAAGCGCCATAAATATAATTGAGGCATAGACAATGGAGATGTCATGCTAT	61
3	n5281	1	0	39	1	15	0	0	3.78127e-08	0.00047463	0.706187	6.25023	GTCGCCGATGATCGCGGCGCTGGCGATGAGTTTGAGTTCGGCTTCGGTGATATTCAATGCGTTGAGGTTGCGGGGTGCAGGATTGGCGCGCAAGTAGCGCTATTCCGTCAATTTGGTAGCAACGCGTCGCCGCGCCGATAGGCGTCCATGAAGCGATCCAGGCCGTGCACGCCGCCATTTACCAACCGGCGCGCGGCCTGGAAATTGCCATGCAACAATGCATCCTTGATAGGCAGCTCCCTGTCGCCGATGAAGAGCGCAAGCAGCTTCGCCGCGACCTTGGCGTCGTTCGCGCGTTCTGGATTGTCTATCAGATTTTCCTTGGGCGACAGGCGCGGGCCGTAAGCGTTGTAGTTCGCCCGCCCGGTCAACTGCACGAAGCCCCGACCGCAGAATGAT…	4964	tr|A0A3S5E688|A0A3S5E688_9BURK_Patatin-like_phospholipase_OS=Achromobacter_spanius_OX=217203_GN=NCTC13519_05015_PE=4_SV=1~~~tr|A0A7D4E2E2|A0A7D4E2E2_9BURK_Patatin-like_phospholipase_family_protein_OS=Achromobacter_pestifer_OX=1353889_GN=FOC84_25975_PE=4_SV=1~~~tr|A0A0B5A729|A0A0B5A729_9CAUD_Putative_chitinase_OS=Achromobacter_phage_JWF_OX=1589748_GN=PJWF_00032_PE=4_SV=1~~~tr|A0A514CT26|A0A514CT26…
3	n5286	1	0	39	1	15	0	0	3.78127e-08	0.00047463	0.706187	6.25023	GCCCAGCGGCACCCAGAAGAAATCCTGCTTCGGCTGGTGGCGCAATTCGCGCACCTCATGCGGCGTGATGCGGTCCAGTTCGGCGTAGACCTGCCGTAGCGACGTCTGGTCTTGCGCCTGGAAAAAGCGGCCGCCGGTCTTGGCGGCGATCGCGCGCAAGGCGTCGAAATCGACC	175	tr|D4XDC6|D4XDC6_9BURK_Enoyl-CoA_hydratase_OS=Achromobacter_piechaudii_ATCC_43553_OX=742159_GN=HMPREF0004_3473_PE=3_SV=1~~~tr|A0A6S7D784|A0A6S7D784_9BURK_Putative_enoyl-CoA_hydratase_echA8_OS=Achromobacter_piechaudii_OX=72556_GN=echA8_3_PE=3_SV=1~~~tr|A0A6S7AQY9|A0A6S7AQY9_9BURK_Enoyl-CoA-hydratase_OS=Achromobacter_deleyi_OX=1353891_GN=dpgD_PE=3_SV=1~~~tr|J4J6Z9|J4J6Z9_9BURK_VWFA_domain-containin…
3	n5296	1	0	39	1	15	0	0	3.78127e-08	0.00047463	0.706187	6.25023	TCCGCCCGGCATGCTGGGCATAGGCGTGGGCGGCACCGCCGAAAAAGCGGTGCTGCTGGCCAAGGAAAGCCTGATGCAGCCGCTG	85	tr|A0A446CE31|A0A446CE31_9BURK_Fumarate_hydratase_class_I_OS=Achromobacter_agilis_OX=1353888_GN=fumB_2_PE=3_SV=1~~~tr|A0A424W4X6|A0A424W4X6_ALCXX_Fumarate_hydratase_class_I_OS=Alcaligenes_xylosoxydans_xylosoxydans_OX=85698_GN=DY367_28785_PE=3_SV=1~~~tr|A0A658AD16|A0A658AD16_ALCXX_Fumarate_hydratase_class_I_OS=Alcaligenes_xylosoxydans_xylosoxydans_OX=85698_GN=DAI43_14135_PE=3_SV=1~~~tr|A0A6S7F0X5|…
3	n5299	1	0	39	1	15	0	0	3.78127e-08	0.00047463	0.706187	6.25023	TGAAGCCTACGCCTTTACTTTCGGCTGATGGCGATCTGGGGTTGCTTCGGAACGCCCTGCAGCAACCCCTTGAACGTGTCCAGGAACGCCTGGGCGCGCGCGGAGACCACGCGCGTCTGAGAGAGCGCATACAGGGTCGTGGGAGGTAGTTCCCACTCCGGCAACACACGCTCCAGCGTGCGCCGCGCCCCCCTGTGGTCCAGCAGCAGATCACACGGCATCCATGCGATGCCCGCGCCTGCCATCGCCAGCTGCACATTGAGCAAGGCGCTCTCGGTCACCACCGTCGATGAAACCGGAATGCGGCAACTCTCGCCGTTTCGGCGCAGTTCCCAGTCCGTCTCGGTCGCGACCACAAGCAACTCATGGTTGTGCAAATCCGCCGGGTCCCTAGGGCGC…	7954	tr|A0A6S7ESW6|A0A6S7ESW6_9BURK_Outer_membrane_protein_OprM_OS=Achromobacter_piechaudii_OX=72556_GN=oprM_6_PE=3_SV=1~~~tr|D4XBT2|D4XBT2_9BURK_Efflux_transporter,_outer_membrane_factor_lipoprotein,_NodT_family_OS=Achromobacter_piechaudii_ATCC_43553_OX=742159_GN=oprM_PE=3_SV=1~~~tr|A0A2I8DSJ5|A0A2I8DSJ5_9BURK_Multidrug_transporter_OS=Achromobacter_sp._AONIH1_OX=1758194_GN=C2U31_17845_PE=3_SV=1~~~tr|…
3	n5412	1	0	39	1	15	0	0	3.78127e-08	0.00047463	0.706187	6.25023	TCAAGAGGTGTCAGCGATTAGCGGCCACAAATCTATGCAAATGCTCAAGCGCTACACCCACCTTCGCGCGGAAGACCTTGTGCAGAAGCTGGATCGCATTGCTGCCATTGTAGAGTCCCCGTAAGGCCACGTAGTAAACCTAAGCCTCCCTGTGGAGCATCAGCTAGGCAAGCGCACCAAAGCCCTGTGCTTCTGCCACGGGGCATTTGAACATTCTCATAGTGAAAGAAATAAGCCGTTGCTAATCTACGAGCAATGAACGGAAGGTGTTCAGCACATTGACGGCCGCATCCTGAACATCACACTGCCACGCACCAGATAGGAAATTGAGTGCCTCAGAGCATTCTGCCGGTTTTAACGGTTGTCCATCCACACATGCAAAGGGGCCGTCCGTCTCCG…	5205	tr|A0A848NDT5|A0A848NDT5_9BURK_Site-specific_integrase_OS=Achromobacter_ruhlandii_OX=72557_GN=HGQ98_02375_PE=4_SV=1~~~tr|A0A4Q1HK13|A0A4Q1HK13_9BURK_Integrase_OS=Achromobacter_aloeverae_OX=1750518_GN=C7R54_13165_PE=4_SV=1~~~tr|A0A7Y4K4U5|A0A7Y4K4U5_9BURK_Site-specific_integrase_OS=Achromobacter_deleyi_OX=1353891_GN=HLG70_07015_PE=4_SV=1~~~tr|D4X3J6|D4X3J6_9BURK_Site-specific_recombinase,_phage_in…
3	n5451	1	0	39	1	15	0	0	3.78127e-08	0.00047463	0.706187	6.25023	GCCCGCGCTGGTGAACGCGATCAAGCCCGCTGTCGAGATCGCGAGCAAGTCGGGCGCAAGGGATCTGATGTCGGCTGCCGTGCAGGCCAATGTGCGCCTTGCGGTTGAACGCCTGAAGACTGCGCAGCCGCTGTTGCAAGAGATGGTGCAGCAGAAAAAGTTGGGAGTGGTGGGCGGCGTGTACAGCCTGGCAACGGGCAAGGTGACGTTGGTCTGACGCCAGCGCCGGGGTCGGCTGAATTCCAGCGCCGGCCGGCCTCGAACTGGTGAGAATTGCTGAGCTTTAATCGTTTTTCCCTTCGTAATATCCGATGAAAG	318	tr|A0A658A8Y7|A0A658A8Y7_ALCXX_Carbonic_anhydrase_OS=Alcaligenes_xylosoxydans_xylosoxydans_OX=85698_GN=DAI43_26600_PE=3_SV=1~~~tr|A0A0M7JVE6|A0A0M7JVE6_9BURK_Carbonic_anhydrase_OS=Achromobacter_aegrifaciens_OX=1287736_GN=cynT_2_PE=3_SV=1~~~tr|A0A6S7F455|A0A6S7F455_9BURK_Carbonic_anhydrase_OS=Achromobacter_insolitus_OX=217204_GN=cynT_2_PE=4_SV=1~~~tr|A0A7D4IBR2|A0A7D4IBR2_9BURK_Carbonic_anhydrase_…
3	n5690	1	0	39	1	15	0	0	3.78127e-08	0.00047463	0.706187	6.25023	CTTGCTCCAGATGTAGCCGACGACCCCGAAAAAGGCCGTCATGTACAGATCGAAGGTGTTG	61	tr|A0A095UJD7|A0A095UJD7_9BURK_Uncharacterized_protein_OS=Achromobacter_sp._RTa_OX=1532557_GN=JL37_23240_PE=4_SV=1~~~tr|E3HJ97|E3HJ97_ACHXA_Uncharacterized_protein_OS=Achromobacter_xylosoxidans_(strain_A8)_OX=762376_GN=AXYL_04683_PE=4_SV=1~~~tr|A0A446CB84|A0A446CB84_9BURK_Uncharacterized_protein_OS=Achromobacter_agilis_OX=1353888_GN=AGI3411_01936_PE=4_SV=1~~~tr|A0A0M7H1D5|A0A0M7H1D5_9BURK_Tripart…
3	n5771	1	0	39	1	15	0	0	3.78127e-08	0.00047463	0.706187	6.25023	GCTACGTCGACATGATGGGCGGCGTGGACGCCGTGGTGAAAAAGGCGCGCGAATACTATGCCAAGGGCGACTATCGCTGGGTGGCCGAGGTGGTCAACTACGCGGTGTTCGCCGATCCGAAGAACCAGGAGGCGCGCAACCTGCAGGCCGATGCGCTGGAG	161	tr|A0A0M7JUP7|A0A0M7JUP7_9BURK_Putative_sterol_carrier_protein_OS=Achromobacter_aegrifaciens_OX=1287736_GN=ERS370000_03903_PE=4_SV=1~~~tr|E3HPY1|E3HPY1_ACHXA_Metallo-beta-lactamase_superfamily_protein_7_OS=Achromobacter_xylosoxidans_(strain_A8)_OX=762376_GN=AXYL_03819_PE=4_SV=1~~~tr|A0A7D4I624|A0A7D4I624_9BURK_MBL_fold_metallo-hydrolase_OS=Achromobacter_pestifer_OX=1353889_GN=FOC84_26365_PE=4_SV=…
3	n5815	1	0	39	1	15	0	0	3.78127e-08	0.00047463	0.706187	6.25023	GCAGCCAGCGGAAGACGCCAAAAAGGCGGGGCCGGCCTTTCTGGGGAAAATCCAGACCCAG	61	tr|A0A6S7AM69|A0A6S7AM69_9BURK_PPDK_N_domain-containing_protein_OS=Achromobacter_deleyi_OX=1353891_GN=LMG3458_05509_PE=4_SV=1~~~tr|A0A0D6HAQ0|A0A0D6HAQ0_ALCXX_Phosphoenolpyruvate_synthase_OS=Alcaligenes_xylosoxydans_xylosoxydans_OX=85698_GN=ppsA_1_PE=4_SV=1~~~tr|A0A2M9GXD0|A0A2M9GXD0_9BURK_Uncharacterized_protein_OS=Achromobacter_ruhlandii_OX=72557_GN=LMG3328_03481_PE=4_SV=1~~~tr|A0A7T2RAZ1|A0A7T…
3	n5902	1	0	39	1	15	0	0	3.78127e-08	0.00047463	0.706187	6.25023	CTTCGCTGAAATGATCGCGCGCATGACCAAAAAGGGCTACGTGCGCCGTAAGCGCTCAGCCCAGGACGGGCGCGCCTATGCGCTGGAGATCACGGAA	97	tr|A0A246Q627|A0A246Q627_9BURK_MarR_family_transcriptional_regulator_OS=Achromobacter_sp._HZ28_OX=2015171_GN=CEY04_13380_PE=4_SV=1~~~tr|D4XEI6|D4XEI6_9BURK_Transcriptional_regulator,_MarR_family_OS=Achromobacter_piechaudii_ATCC_43553_OX=742159_GN=HMPREF0004_3883_PE=4_SV=1~~~tr|A0A6S7DDB3|A0A6S7DDB3_9BURK_Transcriptional_regulator_SlyA_OS=Achromobacter_piechaudii_OX=72556_GN=slyA_3_PE=4_SV=1~~~tr|…
3	n6036	1	0	39	1	15	0	0	3.78127e-08	0.00047463	0.706187	6.25023	GCGCACAAGGCCAGCAGGGAAAACAACACGACGCGGCGCGGCCGCAGACGCAGGTCTGACA	61	tr|A0A2N8KQ21|A0A2N8KQ21_9BURK_MFS_transporter_OS=Achromobacter_pulmonis_OX=1389932_GN=C1I89_04055_PE=3_SV=1~~~tr|A0A446CWD3|A0A446CWD3_9BURK_Uncharacterized_protein_OS=Achromobacter_veterisilvae_OX=2069367_GN=AVE30378_04979_PE=3_SV=1~~~tr|A0A446CQE1|A0A446CQE1_9BURK_Uncharacterized_protein_OS=Achromobacter_agilis_OX=1353888_GN=AGI3411_04435_PE=3_SV=1~~~tr|A0A095UTL6|A0A095UTL6_9BURK_MFS_transpor…
3	n6074	1	0	39	1	15	0	0	3.78127e-08	0.00047463	0.706187	6.25023	GGAAAACAACTACGCGTTCCGCGACTTCGTACGCGAACCGCTGGGCCGTCCCGCCGACGGC	61	tr|A0A7D4E931|A0A7D4E931_9BURK_Alkaline_phosphatase_family_protein_OS=Achromobacter_pestifer_OX=1353889_GN=FOC84_24850_PE=4_SV=1~~~tr|A0A3R9FZ16|A0A3R9FZ16_ACHDE_Alkaline_phosphatase_family_protein_OS=Achromobacter_denitrificans_OX=32002_GN=FOC81_08135_PE=4_SV=1~~~tr|E3HW47|E3HW47_ACHXA_Sulfatase_family_protein_9_OS=Achromobacter_xylosoxidans_(strain_A8)_OX=762376_GN=AXYL_04208_PE=4_SV=1~~~tr|A0A…
3	n6146	1	0	39	1	15	0	0	3.78127e-08	0.00047463	0.706187	6.25023	GTCCGTGGCCTGTTGCGTTGCGTCCAACAAAACAATGGACTCGGGCAGCAAGCTGCGAATT	61	tr|A0A6S7CW61|A0A6S7CW61_9BURK_Uncharacterized_protein_OS=Achromobacter_anxifer_OX=1287737_GN=LMG26858_01906_PE=4_SV=1~~~tr|A0A658A6F9|A0A658A6F9_ALCXX_Glycosyl_transferase_OS=Alcaligenes_xylosoxydans_xylosoxydans_OX=85698_GN=DAI43_24305_PE=4_SV=1~~~tr|A0A424W5D2|A0A424W5D2_ALCXX_Glycosyl_transferase_OS=Alcaligenes_xylosoxydans_xylosoxydans_OX=85698_GN=DY367_27565_PE=4_SV=1~~~tr|E3HEM5|E3HEM5_ACH…
3	n6149	1	0	39	1	15	0	0	3.78127e-08	0.00047463	0.706187	6.25023	CCGTGTTCACGCAAAACAATGGCTTTCATGAGTCTCTTGATGGATGGGTAGGGAAAGAATCACCACGCGGCCAGGCCGGCGATGGCCTGGCGCGTGATCTGCAGGCCGTGGGCC	114	tr|E3HW25|E3HW25_ACHXA_Uncharacterized_protein_OS=Achromobacter_xylosoxidans_(strain_A8)_OX=762376_GN=AXYL_03018_PE=4_SV=1~~~tr|A0A7D4HYJ6|A0A7D4HYJ6_9BURK_DUF2817_domain-containing_protein_OS=Achromobacter_pestifer_OX=1353889_GN=FOC84_30625_PE=4_SV=1~~~tr|A0A0M7I7C0|A0A0M7I7C0_9BURK_Protein_of_uncharacterized_function_(DUF2817)_OS=Achromobacter_aegrifaciens_OX=1287736_GN=ERS370000_03043_PE=4_SV=…
3	n6166	1	0	39	1	15	0	0	3.78127e-08	0.00047463	0.706187	6.25023	TTCCTGAGGCGTCATCGTACGAAGCAGCGCAACAAACTCCGGCGTCGAATTCAAACGCTCGCTGAATTTCTCCAAGGAAATTTTGAACTGCGGATCGAGCTGAGCGGGCATCGCCGCGGCTATATCCGAAGGCTGCTGAGAGGCTACAGAGCGAGCAACCTGTGTGATCAGGAGCCCGCCAAGAACAATGAGTGCAACGCAGAACATTGCACCGCTGACGGCGCGGAGGAGGCCTGACGCTGTCGGGGCGGTATTGGAATGGTCGCGACCAGATGGGCCGGCATAGCTTGAAAACCGTTTCAAGAGCTCGGATCCTGATTGATTCAAGATGGTCACCTGAATCGCGGTCACGAGCAGCCTTATGCCGACAAACAGCGAGATGGAAGTAAGCCAACTCCA…	925	tr|A0A0M7LTQ6|A0A0M7LTQ6_9BURK_Uncharacterized_protein_OS=Achromobacter_aegrifaciens_OX=1287736_GN=ERS370000_05273_PE=4_SV=1~~~tr|A0A7Y4K666|A0A7Y4K666_9BURK_Uncharacterized_protein_OS=Achromobacter_deleyi_OX=1353891_GN=HLG70_11270_PE=4_SV=1~~~tr|A0A7U0I2S0|A0A7U0I2S0_ALCXX_Uncharacterized_protein_OS=Alcaligenes_xylosoxydans_xylosoxydans_OX=85698_GN=I6I48_23535_PE=4_SV=1~~~tr|A0A0Q8WLJ4|A0A0Q8WLJ…
3	n6177	1	0	39	1	15	0	0	3.78127e-08	0.00047463	0.706187	6.25023	GAACTCATGTCCGCGCGGCTCGGCGCGCCCGTCGTGATAGAAAACAAGCCCGGCGCCGGCAGCACCATCGGCGCCACC	78	tr|A0A658AHJ8|A0A658AHJ8_ALCXX_Tripartite_tricarboxylate_transporter_substrate_binding_protein_OS=Alcaligenes_xylosoxydans_xylosoxydans_OX=85698_GN=DAI43_11315_PE=3_SV=1~~~tr|A0A0M7FNI9|A0A0M7FNI9_9BURK_Argininosuccinate_lyase_OS=Achromobacter_aegrifaciens_OX=1287736_GN=ERS370000_01852_PE=3_SV=1~~~tr|A0A424WJS4|A0A424WJS4_ALCXX_Tripartite_tricarboxylate_transporter_substrate_binding_protein_OS=Al…
3	n6225	1	0	39	1	15	0	0	3.78127e-08	0.00047463	0.706187	6.25023	TTCGGAAAACAAGGCGCGGCTGGCCATGCTCAACCCGGCCGACAGCGTCGTCGACTGGGTGCTGGCGCAGATTCCCG	77	tr|A0A446CE31|A0A446CE31_9BURK_Fumarate_hydratase_class_I_OS=Achromobacter_agilis_OX=1353888_GN=fumB_2_PE=3_SV=1~~~tr|A0A424W4X6|A0A424W4X6_ALCXX_Fumarate_hydratase_class_I_OS=Alcaligenes_xylosoxydans_xylosoxydans_OX=85698_GN=DY367_28785_PE=3_SV=1~~~tr|A0A658AD16|A0A658AD16_ALCXX_Fumarate_hydratase_class_I_OS=Alcaligenes_xylosoxydans_xylosoxydans_OX=85698_GN=DAI43_14135_PE=3_SV=1~~~tr|A0A6S7F0X5|…
3	n6257	1	0	39	1	15	0	0	3.78127e-08	0.00047463	0.706187	6.25023	GCCGATGCGCTTGAAGCGCTTGGCCAGGTATTCGCCCATGGCCACGGCCTCGATGTCGTTCTGCAGCGCGAACGAAAACACATTGGGCCGCGGCTTTTCTCCGGTCTTCTCGCCCGCATAGGTCACAACCGGCGTCTGCGCGATGGGGTTCATATAGGGGCGGCCGTCGGCCTGGGCCATGTCGATCACAGCCAGGGTCGGTCCGCTGCCCGCCGGACCGATGATGCCGACAATATCCTTGTTGTCCAGAATGGCGCGCATGTTCTGCACCGCGCGGTCCGGATTCAGCTGGTCATCCAGCAGCATCGCAATCTCGATCTTCTTGCCGTTGATGCCGCCCTTGGCGTTCCATTGTTCGACGGCGAGCTCGACGGCGCGCCGGTTACCTTCGCCAAACTC…	525	tr|A0A246Q7I5|A0A246Q7I5_9BURK_ABC_transporter_permease_OS=Achromobacter_sp._HZ28_OX=2015171_GN=CEY04_16445_PE=4_SV=1~~~tr|A0A2I8DI29|A0A2I8DI29_9BURK_ABC_transporter_permease_OS=Achromobacter_sp._AONIH1_OX=1758194_GN=C2U31_12620_PE=4_SV=1~~~tr|A0A6S6ZG66|A0A6S6ZG66_9BURK_Peripla_BP_6_domain-containing_protein_OS=Achromobacter_pestifer_OX=1353889_GN=LMG3431_04130_PE=4_SV=1~~~tr|A0A7X9ZEZ2|A0A7X9Z…
3	n6337	1	0	39	1	15	0	0	3.78127e-08	0.00047463	0.706187	6.25023	CGAAAACACCGCCCGCCGCCAGCGCCACAGTGCCGGCTTCTTCGCCGCCACCACCGTCTGC	61	tr|F7T4J5|F7T4J5_9BURK_Probable_potassium_transport_system_protein_kup_OS=Achromobacter_insuavis_AXX-A_OX=1003200_GN=kup_PE=3_SV=1~~~tr|A0A446D0M9|A0A446D0M9_9BURK_Probable_potassium_transport_system_protein_kup_OS=Achromobacter_veterisilvae_OX=2069367_GN=kup_PE=3_SV=1~~~tr|A0A2S5GVT8|A0A2S5GVT8_9BURK_Probable_potassium_transport_system_protein_kup_OS=Achromobacter_spanius_OX=217203_GN=trkD_PE=3_…
3	n6383	1	0	39	1	15	0	0	3.78127e-08	0.00047463	0.706187	6.25023	CTGGCCCAGCGAATCCACCCGCAGCGCGCCATGCTGACGCAGGCAGGCGTCATACAGGGCATCGTCGCCGGCCAGCGCTCCCGTATGCGAAGCAGCCGCCGCCGCGCCCGCCTGCGAGCGGCCGGCCTTGATCGCGATGACCGGCTTCCCGGCTGCCGCCGCGCGCAGCAGCGCCCGTCGGAACGCCAGGGAATCGCGGATATCCTCGACGTAAAGTCCGATGACGCGCGTCTGCGGATCGTCGGCAAGATAGGCAATGGCCGACGCCGCATCCATGTCGCACTCATTGCCGGTGGTGATCCATTTGCTGAATCCCAGGCCAGAACGCAGGCAGATGTCCATCCAGTACGCGCCCAACGCGCCACTCTGGCTGACGAAGGCGAAGCCGCCCTGCTTGAT…	841	tr|A0A7Y4KC64|A0A7Y4KC64_9BURK_Acetate--CoA_ligase_family_protein_OS=Achromobacter_deleyi_OX=1353891_GN=HLG70_27085_PE=4_SV=1~~~tr|A0A6S7F6Z1|A0A6S7F6Z1_9BURK_Trans-feruloyl-CoA_synthase_FCS1_OS=Achromobacter_insolitus_OX=217204_GN=FCS1_2_PE=4_SV=1~~~tr|A0A6N0JVC2|A0A6N0JVC2_ACHDE_Acetate--CoA_ligase_family_protein_OS=Achromobacter_denitrificans_OX=32002_GN=FOC81_01970_PE=4_SV=1~~~tr|A0A095UN02|A…
3	n6411	1	0	39	1	15	0	0	3.78127e-08	0.00047463	0.706187	6.25023	GGCCGGCCTGGGGCGGGCCCCGCAAAACACGCCACCACCCCCACCGACCGTGGCCAGAACG	61	tr|A0A7D4I0Z3|A0A7D4I0Z3_9BURK_Polysaccharide_biosynthesis_C-terminal_domain-containing_protein_OS=Achromobacter_pestifer_OX=1353889_GN=FOC84_17720_PE=4_SV=1~~~tr|A0A6S7CF70|A0A6S7CF70_9BURK_Lipid_II_flippase_MurJ_OS=Achromobacter_dolens_OX=1287738_GN=murJ_2_PE=4_SV=1~~~tr|A0A424WKI1|A0A424WKI1_ALCXX_Uncharacterized_protein_OS=Alcaligenes_xylosoxydans_xylosoxydans_OX=85698_GN=DY367_00905_PE=4_SV=…
3	n6443	1	0	39	1	15	0	0	3.78127e-08	0.00047463	0.706187	6.25023	GGGGCGCTGGAACGAAAACACGCCGGTCTGGGCGGGCTGCGTGCGG	46	tr|A0A2S5GTH3|A0A2S5GTH3_9BURK_Outer-membrane_lipoprotein_carrier_protein_OS=Achromobacter_spanius_OX=217203_GN=lolA_PE=3_SV=1~~~tr|A0A6S7EFA9|A0A6S7EFA9_9BURK_Outer-membrane_lipoprotein_carrier_protein_OS=Achromobacter_piechaudii_OX=72556_GN=lolA_PE=3_SV=1~~~tr|D4X8I3|D4X8I3_9BURK_Outer-membrane_lipoprotein_carrier_protein_OS=Achromobacter_piechaudii_ATCC_43553_OX=742159_GN=lolA_PE=3_SV=1~~~tr|A…
3	n6452	1	0	39	1	15	0	0	3.78127e-08	0.00047463	0.706187	6.25023	GCCGCCCAATATCAGCATCCAGGAAAACACGCGCTCGCCCAGCCACAAGGCCACGGCCACG	61	tr|A0A6S7ARS5|A0A6S7ARS5_9BURK_Uncharacterized_protein_OS=Achromobacter_animicus_OX=1389935_GN=LMG26690_04991_PE=4_SV=1~~~tr|A0A0Q8C1A9|A0A0Q8C1A9_9BURK_Uncharacterized_protein_OS=Achromobacter_sp._Root565_OX=1736564_GN=ASD71_16055_PE=4_SV=1~~~tr|A0A2S0I0Z5|A0A2S0I0Z5_9BURK_Uncharacterized_protein_OS=Achromobacter_spanius_OX=217203_GN=CLM73_00310_PE=4_SV=1~~~tr|A0A6S7F1K0|A0A6S7F1K0_9BURK_Unchara…
3	n6485	1	0	39	1	15	0	0	3.78127e-08	0.00047463	0.706187	6.25023	TGAAAACACGGCCTTCATGCTGGACGAGAACAACCGTGTTGCTTTCTACATGGGCGACGAC	61	tr|A0A7Y4KBJ0|A0A7Y4KBJ0_9BURK_PhoX_family_phosphatase_OS=Achromobacter_deleyi_OX=1353891_GN=HLG70_25485_PE=4_SV=1~~~tr|A0A6S7DW74|A0A6S7DW74_9BURK_Uncharacterized_protein_OS=Achromobacter_anxifer_OX=1287737_GN=LMG26858_02966_PE=4_SV=1~~~tr|A0A6S7FBL6|A0A6S7FBL6_9BURK_Uncharacterized_protein_OS=Achromobacter_insolitus_OX=217204_GN=LMG6000_04539_PE=4_SV=1~~~tr|A0A2N8KAN8|A0A2N8KAN8_9BURK_dTDP-gluc…
3	n6487	1	0	39	1	15	0	0	3.78127e-08	0.00047463	0.706187	6.25023	ATCCTGCCAGACGTTGAAGTTCCCCGGCGCGCGCTGTTCGCAAAACACGGCCTTCCAATCGCCCCAACGCATGCCTACCAGCAGGCCGTCGTCGTTGAAGTAGAAGAACTCGTC	114	tr|A0A448CCZ6|A0A448CCZ6_9BURK_N-methyl-L-tryptophan_oxidase_OS=Achromobacter_spanius_OX=217203_GN=solA_PE=4_SV=1~~~tr|J4QPG5|J4QPG5_9BURK_Arylsulfatase_OS=Achromobacter_marplatensis_OX=470868_GN=QWC_19345_PE=4_SV=1~~~tr|A0A2S8V629|A0A2S8V629_9BURK_Arylsulfatase_OS=Achromobacter_sp._MYb9_OX=1827284_GN=CQ050_23245_PE=4_SV=1~~~tr|A0A6S6ZK50|A0A6S6ZK50_9BURK_N-acetylgalactosamine-6-O-sulfatase_OS=Ac…
3	n6600	1	0	39	1	15	0	0	3.78127e-08	0.00047463	0.706187	6.25023	TTATCCCCGCCGCTCTGCAGCTGGAAAACATTGCCCCAGGCGCCGCTCCCTATGCGCCGGATCAAGGTGAAGTC	74	tr|A0A366FSG2|A0A366FSG2_9BURK_Uncharacterized_protein_OS=Achromobacter_marplatensis_OX=470868_GN=DFP87_11093_PE=4_SV=1~~~tr|J4Y963|J4Y963_9BURK_Tetratricopeptide_repeat_family_protein_13_OS=Achromobacter_marplatensis_OX=470868_GN=QWC_21309_PE=4_SV=1~~~tr|A0A7X9W5V3|A0A7X9W5V3_9BURK_Uncharacterized_protein_OS=Achromobacter_sp._Bel_OX=2727415_GN=HG262_25520_PE=4_SV=1~~~tr|A0A6S6YWI5|A0A6S6YWI5_9BU…
3	n6614	1	0	39	1	15	0	0	3.78127e-08	0.00047463	0.706187	6.25023	ACCATCAAATTTCTGAAAGCGCTTTCAAAACATGAAGCGAAAGTCGGCTCCCCTATCCGGG	61
3	n6639	1	0	39	1	15	0	0	3.78127e-08	0.00047463	0.706187	6.25023	ATAGCGGCGAAAGCGCGAAAACATGTATTGAGCCACCGACCCGGGCTCCAGGTACGGCGAC	61	tr|A0A424WK61|A0A424WK61_ALCXX_Uncharacterized_protein_OS=Alcaligenes_xylosoxydans_xylosoxydans_OX=85698_GN=DY367_00225_PE=4_SV=1~~~tr|A0A658ACM1|A0A658ACM1_ALCXX_Uncharacterized_protein_OS=Alcaligenes_xylosoxydans_xylosoxydans_OX=85698_GN=DAI43_10040_PE=4_SV=1~~~tr|A0A7D4E2V7|A0A7D4E2V7_9BURK_Uncharacterized_protein_OS=Achromobacter_pestifer_OX=1353889_GN=FOC84_18540_PE=4_SV=1~~~tr|A0A0M7EZA1|A0…
3	n6716	1	0	39	1	15	0	0	3.78127e-08	0.00047463	0.706187	6.25023	ATGCGCTCGGACTCGCCAGCGCCTCCTTGTGCCGAGACCACCGAGTCCTTCGCAGGCACCGCCGCCGGAACGACGGATACTGGGGGTACGGTGATAGACTGAGACTCCGGCACCACTGGCGTCGGCCTGGCGGGCGGTTGCGTCTTGGCAGCGGAGAAAGGACCTGTCGCCGCCCCCTTCTCCGCCGGTGGGAAAACAGCACCGACTTCCGCGCCCGACCGAAGCGCCTCGATGTCAAATGCCGGCGTTCCCAGCGGCTGCGGCGATCTGAGTGCCGGCCGTCGTGTCTCAGCTTGCAGACCGCCAGGCCCACTTAGGGCAGCCTGCACGGCGGCATCCAGC	342	tr|A0A6S7C553|A0A6S7C553_9BURK_Acyl_transf_3_domain-containing_protein_OS=Achromobacter_piechaudii_OX=72556_GN=LMG1861_00801_PE=4_SV=1~~~tr|D4XHF5|D4XHF5_9BURK_Uncharacterized_protein_OS=Achromobacter_piechaudii_ATCC_43553_OX=742159_GN=HMPREF0004_4902_PE=4_SV=1~~~tr|A0A1N7P177|A0A1N7P177_9BURK_Uncharacterized_protein_OS=Achromobacter_sp._MFA1_R4_OX=1881016_GN=SAMN05428937_0361_PE=4_SV=1
3	n6754	1	0	39	1	15	0	0	3.78127e-08	0.00047463	0.706187	6.25023	GGAAAACAGCCCCTCATCGATGGCGAACGTGGCCTGGCTGGCGCGCACCTTGCAGTTCCAG	61	tr|A0A7D4HSJ7|A0A7D4HSJ7_9BURK_Carbohydrate_kinase_OS=Achromobacter_pestifer_OX=1353889_GN=FOC84_10400_PE=3_SV=1~~~tr|A0A424W977|A0A424W977_ALCXX_Carbohydrate_kinase_OS=Alcaligenes_xylosoxydans_xylosoxydans_OX=85698_GN=DY367_20365_PE=3_SV=1~~~tr|A0A0M7IM55|A0A0M7IM55_9BURK_L-xylulose/3-keto-L-gulonate_kinase_OS=Achromobacter_aegrifaciens_OX=1287736_GN=lyx_PE=3_SV=1~~~tr|A0A7Y4K644|A0A7Y4K644_9BUR…
3	n6804	1	0	39	1	15	0	0	3.78127e-08	0.00047463	0.706187	6.25023	TGCCGGACAATCAGACAAAACAGTGGGCGTGGATCCCCTGCAAAGCCCGTCACCCCATCACAAAGAGGAACTCATG	76	tr|A0A366FZ11|A0A366FZ11_9BURK_Uncharacterized_protein_OS=Achromobacter_marplatensis_OX=470868_GN=DFP87_104258_PE=4_SV=1
3	n7062	1	0	39	1	15	0	0	3.78127e-08	0.00047463	0.706187	6.25023	TATCAAAACCATGGCCCAGCCCAACGACCGCAAACCCGACGTCCTGATCAGCGAGGTCGGTCCGCGCGA	69	tr|A0A0M7ICD1|A0A0M7ICD1_9BURK_Hydroxymethylglutaryl-CoA_lyase_yngG_OS=Achromobacter_aegrifaciens_OX=1287736_GN=yngG_3_PE=3_SV=1~~~tr|A0A424WH80|A0A424WH80_ALCXX_Hydroxymethylglutaryl-CoA_lyase_OS=Alcaligenes_xylosoxydans_xylosoxydans_OX=85698_GN=DY367_05790_PE=3_SV=1~~~tr|E3HUY9|E3HUY9_ACHXA_3-hydroxy-3-methylglutaryl-CoA_lyase_2_OS=Achromobacter_xylosoxidans_(strain_A8)_OX=762376_GN=AXYL_02934_…
3	n7066	1	0	39	1	15	0	0	3.78127e-08	0.00047463	0.706187	6.25023	GCTGCAACAGGCCCTGGCCGCCATCGACAAAACCATGGCCGAGCTGATGGTGCCCTCGTAC	61	tr|A0A6S7AS09|A0A6S7AS09_9BURK_Multidrug_resistance_protein_MdtC_OS=Achromobacter_deleyi_OX=1353891_GN=mdtC_2_PE=4_SV=1~~~tr|A0A1N7R585|A0A1N7R585_9BURK_Multidrug_efflux_pump_OS=Achromobacter_sp._MFA1_R4_OX=1881016_GN=SAMN05428937_4549_PE=4_SV=1~~~tr|A0A0Q8WN86|A0A0Q8WN86_9BURK_Acriflavine_resistance_protein_B_OS=Achromobacter_sp._Root83_OX=1736602_GN=ASE30_20635_PE=4_SV=1~~~tr|A0A658AAB0|A0A658A…
3	n7355	1	0	39	1	15	0	0	3.78127e-08	0.00047463	0.706187	6.25023	CCCCCTCACCCAAAACCCCTGGTCCGTCGAATCCGATCCCGAACTAGGCGCAGTCTCGCTCTCCCATTTCCACCACATAGACCGAGCCCGCCACGCCATCGAGGCCATCGCCCGCATGGTTGGCAACAGCGCATCCGAACCCGACGCAACAGGCGGGCAGCCGTTGGAC	169	tr|A0A424WGM5|A0A424WGM5_ALCXX_Uncharacterized_protein_OS=Alcaligenes_xylosoxydans_xylosoxydans_OX=85698_GN=DY367_07765_PE=4_SV=1~~~tr|A0A446CHY1|A0A446CHY1_9BURK_Uncharacterized_protein_OS=Achromobacter_agilis_OX=1353888_GN=AGI3411_03190_PE=4_SV=1~~~tr|A0A366G3G8|A0A366G3G8_9BURK_Uncharacterized_protein_OS=Achromobacter_marplatensis_OX=470868_GN=DFP87_103703_PE=4_SV=1~~~tr|A0A095VJX3|A0A095VJX3_…
3	n7404	1	0	39	1	15	0	0	3.78127e-08	0.00047463	0.706187	6.25023	GCTTACGAACCGAACAGGCTTATGTCCACTTGTGGGGTGCAAATAAAGTTTCATCCTAACGGGAACGATTTGCTGGGCTGGCTGGGAAGCTCACTGCCCGACCTGTACCTAAAGTCTCATCCTAATGCCTCGCAGCGGCCTTCAAATGGTCGGAAAACCCCGGAGCCATGCGAATAAAGTGTCATCCTTACCTGAAATCGTAAGTCGTTGATTTCTATTGCGACCTTGCTAATTTCCTCCCTGATTGCGGCCTTGCAGGCCGCAATCATTGGGGGTTCCAGGGGGCGGACAAGGCCAGAACCCGATTGCTCGGGATGACACTTTATTTCTAAGGATGAAACTTTATTTGCATCCCACACCACTGGGTTCGTGCCTTCATCCGTTTCCA	388	tr|A0A3Q9KJ09|A0A3Q9KJ09_9BURK_23S_rRNA_(uracil(1939)-C(5))-methyltransferase_RlmD_OS=Achromobacter_spanius_OX=217203_GN=rlmD_PE=3_SV=1~~~tr|A0A3S4NZG8|A0A3S4NZG8_9BURK_23S_rRNA_(uracil(1939)-C(5))-methyltransferase_RlmD_OS=Achromobacter_spanius_OX=217203_GN=rlmD_PE=3_SV=1~~~tr|A0A7Y4K7I5|A0A7Y4K7I5_9BURK_23S_rRNA_(uracil(1939)-C(5))-methyltransferase_RlmD_OS=Achromobacter_deleyi_OX=1353891_GN=rl…
3	n7562	1	0	39	1	15	0	0	3.78127e-08	0.00047463	0.706187	6.25023	AAAACCCGCCCCCCTGGCCGTTTGCTCCGCGCCACCATGGCCGGCCTGTTGGCGTCCGCCCTGGCCGCCATGTCCGGCCCCGCCGCAACCGCCGCCGAATCCACCAGCGCGGCGGCGCTGCCGCCCACCGCCCAGGCCGCC	141
3	n7680	1	0	39	1	15	0	0	3.78127e-08	0.00047463	0.706187	6.25023	CAGCAGCAGCAGCAGCAGCAGCAGCAGCAAAAGCAACCAGAAAACCTACGGCCGCCCCCGCAGCCACTCCTC	72
3	n7698	1	0	39	1	15	0	0	3.78127e-08	0.00047463	0.706187	6.25023	ATCAAAACCTAGCTACGCCTACGAGTGGTACGTC	34	tr|A0A095XL88|A0A095XL88_9BURK_MFS_transporter_OS=Achromobacter_sp._RTa_OX=1532557_GN=JL37_03055_PE=4_SV=1~~~tr|A0A0M7G9F6|A0A0M7G9F6_9BURK_L-galactonate_transporter_OS=Achromobacter_aegrifaciens_OX=1287736_GN=yjjL_PE=4_SV=1~~~tr|A0A424W4E6|A0A424W4E6_ALCXX_MFS_transporter_OS=Alcaligenes_xylosoxydans_xylosoxydans_OX=85698_GN=DY367_29285_PE=4_SV=1~~~tr|E3HX96|E3HX96_ACHXA_Sugar_transporter_family_…
3	n7924	1	0	39	1	15	0	0	3.78127e-08	0.00047463	0.706187	6.25023	ACTCTAGCAAAACCTGCTTGAGCCGCCCAGCCCCCGCGAAATATCGTGGCGTCTAACGCA	60	tr|A0A427WM75|A0A427WM75_ACHDE_5-oxoprolinase_subunit_PxpB_OS=Achromobacter_denitrificans_OX=32002_GN=pxpB_PE=4_SV=1~~~tr|A0A5N7ZHF4|A0A5N7ZHF4_9BURK_5-oxoprolinase_subunit_PxpB_OS=Achromobacter_sp._OX=134375_GN=pxpB_PE=4_SV=1~~~tr|A0A446CJ28|A0A446CJ28_9BURK_Kinase_A_inhibitor_OS=Achromobacter_veterisilvae_OX=2069367_GN=kipI_2_PE=4_SV=1~~~tr|A0A658AJC0|A0A658AJC0_ALCXX_Allophanate_hydrolase_(Fra…
3	n7970	1	0	39	1	15	0	0	3.78127e-08	0.00047463	0.706187	6.25023	GCAGGATTTGGCGATGGCGACGAACGCCGGGAATTGGCAAGCCTACCGGGACAAGTGGGCCGAATTGCTGCCGGTGTTGAAGGAACTGGAAGCCGCTGCGGTGGCGAACCGGAACGCGCCAGGCGCGGCAAACATCCTTAGTCTGTATCGCAACGATTTGGGCCTGTTCTTGCAGAATGCGGGCCTTGCCTCGGCGGGCAGCCTGGACGATTTCAGCGCCCGGATTCTGGCGGGCCTGGACGGCGAACGGCCAGCGGCGGCGGCAACGGCTGGCGTCAATGTCGTGCAGCAATCCGTGACGCGAGGCGTTGAGTTCGGCAAGGGCATCGGGACGGCACAAGCGGAAACGATTCTTGCGGAGTATCGCGCCCAAGTTCAGCAGCGCGGCGCGGAACGCAT…	1000	tr|A0A193PMK4|A0A193PMK4_ALCXX_Conjugal_transfer_coupling_protein_TraG_OS=Alcaligenes_xylosoxydans_xylosoxydans_OX=85698_GN=traG_PE=3_SV=1~~~tr|A0A0D5A0C3|A0A0D5A0C3_9BURK_Conjugal_transfer_protein_TraG_OS=Achromobacter_sp._LM16_OX=1449778_GN=pLM16A1_p17_PE=3_SV=1~~~tr|T2K1A4|T2K1A4_ACHDE_Conjugal_transfer_protein_TraG_OS=Achromobacter_denitrificans_OX=32002_GN=traG_PE=3_SV=1~~~tr|A0A7T2RD72|A0A7…
3	n8004	1	0	39	1	15	0	0	3.78127e-08	0.00047463	0.706187	6.25023	CCGATCAGCGCCCTTGAAAACCTGGAACGGCTGGACATTCAGTACTGCAAACGGATTGCGG	61	tr|A0A6S7F3X4|A0A6S7F3X4_9BURK_Uncharacterized_protein_OS=Achromobacter_insolitus_OX=217204_GN=LMG6000_03827_PE=4_SV=1~~~tr|A0A658A9I6|A0A658A9I6_ALCXX_Uncharacterized_protein_OS=Alcaligenes_xylosoxydans_xylosoxydans_OX=85698_GN=DAI43_25245_PE=4_SV=1~~~tr|A0A0M9HYB5|A0A0M9HYB5_9BURK_Leucine_Rich_repeats_(2_copies)_OS=Achromobacter_aegrifaciens_OX=1287736_GN=ERS370000_00234_PE=4_SV=1~~~tr|A0A7D4E2…
3	n8037	1	0	39	1	15	0	0	3.78127e-08	0.00047463	0.706187	6.25023	CGCCGAACTTTGCCAACGGGTACAGGACGCTCTGGCCCTGCGCTCCAGGAAAACCTGGCTGGAACAGCTGGAAGCCGTGGG	81	tr|A0A246QAW3|A0A246QAW3_9BURK_5-oxoprolinase_OS=Achromobacter_sp._HZ28_OX=2015171_GN=CEY04_08320_PE=4_SV=1~~~tr|A0A4Q1HJQ5|A0A4Q1HJQ5_9BURK_5-oxoprolinase_OS=Achromobacter_aloeverae_OX=1750518_GN=C7R54_12440_PE=4_SV=1~~~tr|E3HW04|E3HW04_ACHXA_CoA-transferase_family_III_family_protein_22_OS=Achromobacter_xylosoxidans_(strain_A8)_OX=762376_GN=AXYL_02997_PE=4_SV=1~~~tr|A0A0M7I7B2|A0A0M7I7B2_9BURK_F…
3	n8082	1	0	39	1	15	0	0	3.78127e-08	0.00047463	0.706187	6.25023	TGAAAACCTGGTGTCCGCCATGAACGACGGCGTGCGCATGGGCCCGGGATTCAACCCGCCG	61	tr|A0A6S6ZZ25|A0A6S6ZZ25_9BURK_Outer_membrane_protein_OprM_OS=Achromobacter_pestifer_OX=1353889_GN=oprM_5_PE=3_SV=1~~~tr|E3HEM6|E3HEM6_ACHXA_Amidohydrolase_family_protein_14_OS=Achromobacter_xylosoxidans_(strain_A8)_OX=762376_GN=AXYL_03115_PE=4_SV=1~~~tr|A0A7D4E106|A0A7D4E106_9BURK_Amidohydrolase_OS=Achromobacter_pestifer_OX=1353889_GN=FOC84_30080_PE=4_SV=1~~~tr|A0A6S7EVI0|A0A6S7EVI0_9BURK_N-subs…
3	n8091	1	0	39	1	15	0	0	3.78127e-08	0.00047463	0.706187	6.25023	TCCCGCAGTCCGGACGCCGGCGGCTCAAGAGCTCAGCCTCATAAAACCGAAATGGCAGGGCTTCGAGCTTGCGGATGTCAGGG	83	tr|A0A2S0I7A5|A0A2S0I7A5_9BURK_DNA_repair_exonuclease_OS=Achromobacter_spanius_OX=217203_GN=CLM73_12655_PE=4_SV=1~~~tr|A0A6S6Z8Y8|A0A6S6Z8Y8_9BURK_Metallophos_domain-containing_protein_OS=Achromobacter_animicus_OX=1389935_GN=LMG26690_00719_PE=4_SV=1~~~tr|A0A854PRD4|A0A854PRD4_9BURK_DNA_repair_exonuclease_OS=Achromobacter_sp._KAs_3-5_OX=1915388_GN=BMR85_020495_PE=4_SV=1~~~tr|A0A176XTC4|A0A176XTC4_…
3	n8098	1	0	39	1	15	0	0	3.78127e-08	0.00047463	0.706187	6.25023	TACAAAACCGAACGTCAGCAATTCAGCCAAGAACGTCCTAAGCCGGCGCGCGTTCACGGTCCA	63	tr|A0A6S7CUE4|A0A6S7CUE4_9BURK_p-hydroxybenzoic_acid_efflux_pump_subunit_AaeB_OS=Achromobacter_dolens_OX=1287738_GN=aaeB_2_PE=4_SV=1
3	n8159	1	0	39	1	15	0	0	3.78127e-08	0.00047463	0.706187	6.25023	GAGCGCCACCGGAAAACCGATGGCGCACGCGGCTGCCGCCGCCTCTTGCGCCGTGGCCGCC	61
3	n8191	1	0	39	1	15	0	0	3.78127e-08	0.00047463	0.706187	6.25023	CCGCTTCACCTGGTGGGAAAACCGCACGCAAAACCGCAACGCGTACTTCAACCAGTTCACCAACACCAGCGAC	73	tr|A0A0Q8XME3|A0A0Q8XME3_9BURK_TonB-dependent_receptor_OS=Achromobacter_sp._Root83_OX=1736602_GN=ASE30_23180_PE=3_SV=1~~~tr|A0A6S7A4P9|A0A6S7A4P9_9BURK_Fe(3+)-pyochelin_receptor_OS=Achromobacter_kerstersii_OX=1353890_GN=fptA_2_PE=3_SV=1~~~tr|A0A7Y4NLK6|A0A7Y4NLK6_9BURK_TonB-dependent_siderophore_receptor_OS=Achromobacter_deleyi_OX=1353891_GN=HLG70_17255_PE=3_SV=1~~~tr|H0F8Q6|H0F8Q6_9BURK_TonB-dep…
3	n8194	1	0	39	1	15	0	0	3.78127e-08	0.00047463	0.706187	6.25023	AAAGAGATACCAGTAGTATCCCTAATAGGCCTGACCGGATACAGCCAGGCAATCAGAGTGGCGAGAAAAGGGAAGGCAGAGGGAAAGCGGAGGAAAAACGGAAAGGAAGGTGCGGGGGGAGAAAACCGCAAGGAGAGAAAAAACAAGTCCCACGCCAGCGCGCCAGCGCACACCGCCC	178	tr|A0A5K4Z368|A0A5K4Z368_ALCXX_Amino_acid_ABC_transporter_ATP-binding_protein_OS=Alcaligenes_xylosoxydans_xylosoxydans_OX=85698_GN=AL520_15685_PE=4_SV=1~~~tr|A0A6S7BS29|A0A6S7BS29_9BURK_Glutamine_transport_ATP-binding_protein_GlnQ_OS=Achromobacter_dolens_OX=1287738_GN=glnQ_1_PE=3_SV=1~~~tr|A0A848NFF5|A0A848NFF5_9BURK_Amino_acid_ABC_transporter_ATP-binding_protein_OS=Achromobacter_ruhlandii_OX=725…
3	n8316	1	0	39	1	15	0	0	3.78127e-08	0.00047463	0.706187	6.25023	CGACCATGTGATCGCGCTGGGCCTGACGCACCAGGAGCGCCTGCTGGTGGTGGGCCCGCTTTATCACGTCGGCGCCTTCGACCTGCCAGGTATCGCGGTGCTGTGGGTGGGCGGCACGCTGTGCGTGCACCGAGAGTTCGACCCGGAAGCGGTGCTTGCTTCCATCGAGCGCCATGGCCTCACCTGCGGCTGGATGGCCCCTGTCATGTTGAGCCGCGTGCTGGCCGTGCAGCACCCCGAACGGTACTCCCTCGATACCTTCGGCTGGTGCATTGCCGGAGGCGAAAAGACGCCGGAATCCCGCATCCGAGACTTCACCCGCGTGTTTACCCGGGGACGCTTTATTGATGGCTTCGGCATGACGGAAACCTGCAGCGGCGACACGCTCATGGAACCCGG…	865	tr|A0A1R1JS54|A0A1R1JS54_ALCXX_Long-chain_fatty_acid--CoA_ligase_OS=Alcaligenes_xylosoxydans_xylosoxydans_OX=85698_GN=BIZ92_29560_PE=4_SV=1~~~tr|A0A0Q8XUA7|A0A0Q8XUA7_9BURK_Long-chain_fatty_acid--CoA_ligase_OS=Achromobacter_sp._Root83_OX=1736602_GN=ASE30_00480_PE=4_SV=1~~~tr|A0A6S7F757|A0A6S7F757_9BURK_Long-chain-fatty-acid--CoA_ligase_OS=Achromobacter_insolitus_OX=217204_GN=LMG6000_01634_PE=4_SV…
3	n8437	1	0	39	1	15	0	0	3.78127e-08	0.00047463	0.706187	6.25023	GCCACACGCACAAATGAAAACCGTCAAATTCGCGGAAAGCCTCTCCATCTTCGTCGACGTC	61	tr|E3HTY0|E3HTY0_ACHXA_Bacterial_regulatory_helix-turn-helix_protein,_LysR_family_protein_134_OS=Achromobacter_xylosoxidans_(strain_A8)_OX=762376_GN=AXYL_04101_PE=3_SV=1~~~tr|A0A6S7FJX6|A0A6S7FJX6_9BURK_HTH-type_transcriptional_regulator_DmlR_OS=Achromobacter_insolitus_OX=217204_GN=dmlR_27_PE=3_SV=1~~~tr|A0A424WCY9|A0A424WCY9_ALCXX_LysR_family_transcriptional_regulator_OS=Alcaligenes_xylosoxydans…
3	n8494	1	0	39	1	15	0	0	3.78127e-08	0.00047463	0.706187	6.25023	AAGACGTTGGCCTCCGTATCCGTGTTGAAAAGGAACTCCGCGAGGCGTTCCAAGGGGCTTGCTTGGCTGAAAACCGGAAGGCATCGGAAGTGCTGCGCGAGTTTATGCAGGCATTCGCCGACCGACACCAAGGCGGCTTGCAGCCGGATATGTTCACGACACCAGCAGCCAGGAAGCCACGTCAATCAACCAAGAGAAAAGCG	203	tr|A0A811GWC0|A0A811GWC0_9BURK_FMN-dependent_NADH-azoreductase_OS=Achromobacter_mucicolens_OX=1389922_GN=azoR_1_PE=4_SV=1~~~tr|F7T6V4|F7T6V4_9BURK_Uncharacterized_protein_OS=Achromobacter_insuavis_AXX-A_OX=1003200_GN=AXXA_23440_PE=4_SV=1~~~tr|A0A120LIE8|A0A120LIE8_ALCXX_Uncharacterized_protein_OS=Alcaligenes_xylosoxydans_xylosoxydans_OX=85698_GN=AL504_05365_PE=4_SV=2~~~tr|A0A0D5A0X6|A0A0D5A0X6_9B…
3	n8499	1	0	39	1	15	0	0	3.78127e-08	0.00047463	0.706187	6.25023	GCGGGTGTAGAACTGGACGCCGGCCACGGTATCCAGTTGAAAACCGGACTCCGGAAATATCTTGGTGTAGGCCACCTG	78	tr|A0A2S8VD39|A0A2S8VD39_9BURK_Autotransporter_domain-containing_protein_OS=Achromobacter_sp._MYb9_OX=1827284_GN=CQ050_12600_PE=4_SV=1~~~tr|H0F5F4|H0F5F4_9BURK_Fe2+-dicitrate_sensor_membrane_protein_OS=Achromobacter_arsenitoxydans_SY8_OX=477184_GN=KYC_09986_PE=4_SV=1~~~tr|A0A366GBK6|A0A366GBK6_9BURK_Uncharacterized_protein_OS=Achromobacter_marplatensis_OX=470868_GN=DFP87_101812_PE=4_SV=1~~~tr|A0A…
3	n8636	1	0	39	1	15	0	0	3.78127e-08	0.00047463	0.706187	6.25023	AAAGCCGGAAAACCGGTGCAGCGCGTCGCCCGGCTTGTCCACGGATAGCGGCATGACATTG	61	tr|A0A109Q4N7|A0A109Q4N7_9PSED_Choline_dehydrogenase_OS=Pseudomonas_monteilii_OX=76759_GN=APT63_19985_PE=3_SV=1~~~tr|A0A4Q1HIF5|A0A4Q1HIF5_9BURK_Choline_dehydrogenase_OS=Achromobacter_aloeverae_OX=1750518_GN=C7R54_17705_PE=3_SV=1~~~tr|A0A246Q398|A0A246Q398_9BURK_Choline_dehydrogenase_OS=Achromobacter_sp._HZ28_OX=2015171_GN=CEY04_20685_PE=3_SV=1~~~tr|A0A6S7F1J9|A0A6S7F1J9_9BURK_Oxygen-dependent_ch…
3	n8693	1	0	39	1	15	0	0	3.78127e-08	0.00047463	0.706187	6.25023	GGAATCCGGGAATGTAGGCGGTGGTCATCGATACCCTTCAGCGAAGGGCGACAGACTAGCCTTTGAGATCAGATTAGGAAAACTAATTATCCTAATCCTTATTTAGTAATCCTAACTCAGCCATACACGTCTCGGTGGCCAGGGAGGGCCGGCGATGGCGGCACGGAGCCGGCTTGGCCCGATGCCGCCCGAAGCGAAGCGATGCTTTCAGCTGCCGCCCTGGTCGGCAGCGCG	234	tr|A0A3Q9KHB3|A0A3Q9KHB3_9BURK_AMP-binding_domain-containing_protein_OS=Achromobacter_spanius_OX=217203_GN=ELS24_01600_PE=4_SV=1~~~tr|A0A6N0JLH3|A0A6N0JLH3_ACHDE_Methyltransferase_regulatory_domain-containing_protein_OS=Achromobacter_denitrificans_OX=32002_GN=FOC81_15250_PE=4_SV=1~~~tr|A0A2S5GQX4|A0A2S5GQX4_9BURK_Uncharacterized_protein_OS=Achromobacter_spanius_OX=217203_GN=C4E15_15575_PE=4_SV=1
3	n8828	1	0	39	1	15	0	0	3.78127e-08	0.00047463	0.706187	6.25023	CATTCCTTCATGTAGGTACGGTAACGGGCGTTATTGCGCTTCTCCAGTGACATAGCCCATCGATGCTCCCATCTCCTTGATCTCTATGGCCTTATCCAACAACGTGGCTATCAAAACTCCATTCGAGTTGAGGTTTGGTTCACTTGTCGAAATTCATCTAACTTGGGATTTACG	174	tr|A0A2N8KK34|A0A2N8KK34_9BURK_Integrase_OS=Achromobacter_pulmonis_OX=1389932_GN=C1I89_14560_PE=4_SV=1
3	n8981	1	0	39	1	15	0	0	3.78127e-08	0.00047463	0.706187	6.25023	TCTCTCCATGTCATAGCTTTGAACTATTTAGGTAACCATTAAAACTTAATTTGACGGGTTACTAAAAAGGCGTAAGAATGGCCCGC	86
3	n9069	1	0	39	1	15	0	0	3.78127e-08	0.00047463	0.706187	6.25023	AGTCCGTTACGCGCCGGCCTGGCTCTCCGCTTCACCGATCCGGAAAACTTGAGATAGATCCCAATCTCCCATGCCG	76	tr|A0A7X9VZE8|A0A7X9VZE8_9BURK_Magnesium-transporting_ATPase,_P-type_1_OS=Achromobacter_sp._Bel_OX=2727415_GN=mgtA_PE=3_SV=1~~~tr|A0A5N7ZRH5|A0A5N7ZRH5_9BURK_NAD(P)-dependent_oxidoreductase_OS=Achromobacter_sp._OX=134375_GN=E2603_18690_PE=4_SV=1~~~tr|A0A6N0JJS6|A0A6N0JJS6_ACHDE_NAD(P)-dependent_oxidoreductase_OS=Achromobacter_denitrificans_OX=32002_GN=FOC81_10075_PE=4_SV=1~~~tr|A0A658ADF1|A0A658A…
3	n9106	1	0	39	1	15	0	0	3.78127e-08	0.00047463	0.706187	6.25023	GTTCGTCGGCTCGCAGCTGGACCTGTGGGGAAAACTGATCCGCGACGCGGGAATCGAGCAG	61	tr|A0A2S8VHF0|A0A2S8VHF0_9BURK_ABC_transporter_substrate-binding_protein_OS=Achromobacter_sp._MYb9_OX=1827284_GN=CQ050_07010_PE=3_SV=1~~~tr|A0A0M7HGL8|A0A0M7HGL8_ALCXX_Argininosuccinate_lyase_OS=Alcaligenes_xylosoxydans_xylosoxydans_OX=85698_GN=ERS369984_03269_PE=3_SV=1~~~tr|A0A1R1K0S3|A0A1R1K0S3_ALCXX_ABC_transporter_substrate-binding_protein_OS=Alcaligenes_xylosoxydans_xylosoxydans_OX=85698_GN=…
3	n9257	1	0	39	1	15	0	0	3.78127e-08	0.00047463	0.706187	6.25023	CGTCGAAGCCGCGATAGGCTTGGCTGAAAACTGGGCCCGCGCGCATCACGCGGACGCTGAT	61	tr|A0A0M7M4Z1|A0A0M7M4Z1_9BURK_Uncharacterized_protein_OS=Achromobacter_aegrifaciens_OX=1287736_GN=ERS370000_05636_PE=4_SV=1~~~tr|E3HJZ4|E3HJZ4_ACHXA_Putative_membrane_protein_27_OS=Achromobacter_xylosoxidans_(strain_A8)_OX=762376_GN=AXYL_02295_PE=4_SV=1~~~tr|A0A6S7CV90|A0A6S7CV90_9BURK_Uncharacterized_protein_OS=Achromobacter_anxifer_OX=1287737_GN=LMG26858_02370_PE=4_SV=1~~~tr|A0A7D4E0T0|A0A7D4E…
3	n9337	1	0	39	1	15	0	0	3.78127e-08	0.00047463	0.706187	6.25023	GCGCCCTACGAGAACAAGCCGGAGAACCGGGCCAGCTACTTTGCCACTCTGGAAAACGACAACGGCGAACGGCACACCATTTGGGGCGTCGATCTTGAACGCGCCATTGCGGCCAGCGGCGCGAAGCGAGGCGACCGTATCGGCCTGGAACATGGCGGCTCTGAAACCGTGCGCCTGCCAGACGGCACCACGGCCGAGCGCAACACCTGGCACGTTCGCGGCGCGGCCGAGCTGGCC	237	tr|A0A0Q8BKN7|A0A0Q8BKN7_9BURK_ABC_transporter_OS=Achromobacter_sp._Root565_OX=1736564_GN=ASD71_10220_PE=4_SV=1~~~tr|A0A6S6ZXK7|A0A6S6ZXK7_9BURK_Putative_ABC_transporter_ATP-binding_protein_YheS_OS=Achromobacter_animicus_OX=1389935_GN=yheS_3_PE=4_SV=1~~~tr|A0A446C4X7|A0A446C4X7_9BURK_Spermidine_N(1)-acetyltransferase_OS=Achromobacter_agilis_OX=1353888_GN=speG_1_PE=4_SV=1~~~tr|A0A7T4AZ68|A0A7T4AZ6…
3	n9412	1	0	39	1	15	0	0	3.78127e-08	0.00047463	0.706187	6.25023	GGCCGCGGACGCGGCGGTCGCCGGCATCGACGCCGCAGTGCGCGCGATCGCAGTCGGCGCCACCGAAAACGATCTCGCCGCCGCCATGCTGCACGGCGCCACC	103	tr|A0A811GVE8|A0A811GVE8_9BURK_Sensor_protein_RstB_OS=Achromobacter_mucicolens_OX=1389922_GN=rstB_PE=4_SV=1~~~tr|A0A176XY95|A0A176XY95_ALCXX_Histidine_kinase_OS=Alcaligenes_xylosoxydans_xylosoxydans_OX=85698_GN=A7J67_26505_PE=4_SV=1~~~tr|A0A8B5V658|A0A8B5V658_9BURK_Two-component_system_sensor_kinase_ParS_OS=Achromobacter_sp._SLBN-14_OX=2768442_GN=FBY20_4781_PE=4_SV=1~~~tr|A0A0Q8BJJ1|A0A0Q8BJJ1_9B…
3	n9417	1	0	39	1	15	0	0	3.78127e-08	0.00047463	0.706187	6.25023	TGCTGGACCTGATCCGCGAACTCAAGAACGTTCCGACGAAAACGATTCTGCTCGTGGAGCACAAGATGGACGTGGTGC	78	tr|A0A427WM62|A0A427WM62_ACHDE_ABC_transporter_ATP-binding_protein_OS=Achromobacter_denitrificans_OX=32002_GN=FOC81_26010_PE=4_SV=1~~~tr|A0A4Q1HNZ2|A0A4Q1HNZ2_9BURK_ABC_transporter_ATP-binding_protein_OS=Achromobacter_aloeverae_OX=1750518_GN=C7R54_00060_PE=4_SV=1~~~tr|A0A246QFM8|A0A246QFM8_9BURK_ABC_transporter_ATP-binding_protein_OS=Achromobacter_sp._HZ28_OX=2015171_GN=CEY04_02520_PE=4_SV=1~~~tr…
3	n9816	1	0	39	1	15	0	0	3.78127e-08	0.00047463	0.706187	6.25023	CAGATGCTGCGCCGCCGGCTCAGCGGCAACACCGAAAACGCCGCGGACCTGGCGCACGACACCTTCGAACGCGTCATGCGCAGC	84	tr|A0A109XWC8|A0A109XWC8_ALCXX_RNA_polymerase_subunit_sigma_OS=Alcaligenes_xylosoxydans_xylosoxydans_OX=85698_GN=AL504_12670_PE=3_SV=1~~~tr|A0A2S0I3R2|A0A2S0I3R2_9BURK_RNA_polymerase_subunit_sigma_OS=Achromobacter_spanius_OX=217203_GN=CLM73_05835_PE=3_SV=1~~~tr|E3HKA8|E3HKA8_ACHXA_RNA_polymerase,_sigma-24_subunit,_ECF_subfamily_2_OS=Achromobacter_xylosoxidans_(strain_A8)_OX=762376_GN=AXYL_04750_P…
3	n9918	1	0	39	1	15	0	0	3.78127e-08	0.00047463	0.706187	6.25023	CAGCGCGAGCTTGCCGACAGGTATGCACGCAATCCGCAGGAAATCACGCGCAGCCGACAGCAGCAGCGTGAACAGGAGCGCGGCCGCGATGGCGGGCGCGGGTATTGAGTTAAAACGCTTTTACTCATTTGCGTTTAGTGTTATGATGCAATGAGTAAATGAGAATTTGAGGTTTACGCCAGGAGGAAAGACGATGAGCACCGAACCGACGAACGAAGAACTTGCCAAGAGCTATGCAACGAAGATCGAGCAGGCCCAGGAGCGCCGCGAGGCGAAAGACCAGGAGCGGCTAGAGCGGCACGGCCAGGCGGCCGCGCTGGCATCGCAGAACATCGAGGCCGAGCAACCGCAGGCCAAGCAGGCCCAGGGCTTCGAGCTGGACGCGCAGAACCAAGACAG…	451	tr|A0A0D5A100|A0A0D5A100_9BURK_Conjugal_transfer_protein_TraA_OS=Achromobacter_sp._LM16_OX=1449778_GN=pLM16A1_p14_PE=3_SV=1~~~tr|T2K1B0|T2K1B0_ACHDE_Conjugal_transfer_protein_TraA_OS=Achromobacter_denitrificans_OX=32002_GN=traA_PE=3_SV=1~~~tr|A0A193PMW1|A0A193PMW1_ALCXX_Conjugal_transfer_protein_TraA_OS=Alcaligenes_xylosoxydans_xylosoxydans_OX=85698_GN=traA_PE=3_SV=1~~~tr|A0A6S7DT92|A0A6S7DT92_9B…
3	n10146	1	0	39	1	15	0	0	3.78127e-08	0.00047463	0.706187	6.25023	TGCGTAAAACGTACCCACCAGCATCGCCAGGTTGATGACGGACTTGATGCCGTACTTGCCG	61	tr|A0A6S6ZGS9|A0A6S6ZGS9_9BURK_Aerobic_C4-dicarboxylate_transport_protein_OS=Achromobacter_pestifer_OX=1353889_GN=dctA_1_PE=4_SV=1~~~tr|A0A658AA22|A0A658AA22_ALCXX_C4-dicarboxylate_transport_protein_OS=Alcaligenes_xylosoxydans_xylosoxydans_OX=85698_GN=dctA_PE=3_SV=1~~~tr|A0A6S7FA90|A0A6S7FA90_9BURK_C4-dicarboxylate_transport_protein_OS=Achromobacter_insolitus_OX=217204_GN=dctA_PE=3_SV=1~~~tr|A0A6…
3	n10253	1	0	39	1	15	0	0	3.78127e-08	0.00047463	0.706187	6.25023	CGTGCGCAGCGAAAGCGGTTCCGACTGGCTGAAATTCAACGCCAAATTCCACAGTCTGATCACCCAGGCCAGCCACAACGAACGTCTGCACGAGCTGGTCGCCGAGTTGCAGGGCAGCATCGTTTCCAATGTGCTGGGATTCGCCTCCAAGATGCCACCCCGCCTGATGGAAGAAAACATCAAGCAGCACGAGGACATCATCGCGGCGCTGACCCTGCGCAATGGCCCCGCCGCTCGCGAAGCGATGGCCACGCACATATCCCGGACGACCGAACTCGTCATCGAATGGATGGAGTCGCGGCGCTAGCCAGCTTTGCGCCGCTCGCGCCTTGCGGCTTCCCATAGGGACGCATCAACACGCCGCAGGCTGCCGCGATCAATCCCAGTCCCGCCAGATAC…	1116	tr|A0A2I8DSH1|A0A2I8DSH1_9BURK_GntR_family_transcriptional_regulator_OS=Achromobacter_sp._AONIH1_OX=1758194_GN=C2U31_23025_PE=4_SV=1~~~tr|A0A0M7FII7|A0A0M7FII7_9BURK_Uncharacterized_HTH-type_transcriptional_regulator_ydfH_OS=Achromobacter_aegrifaciens_OX=1287736_GN=ydfH_3_PE=4_SV=1~~~tr|A0A6S7DZ35|A0A6S7DZ35_9BURK_HTH-type_transcriptional_repressor_RspR_OS=Achromobacter_anxifer_OX=1287737_GN=rspR…
3	n10255	1	0	39	1	15	0	0	3.78127e-08	0.00047463	0.706187	6.25023	GGCGGCCGAAAACGTCGCCAGCGTGGCCGACATCGACGCC	40	tr|A0A1N7NXU8|A0A1N7NXU8_9BURK_3-hydroxyacyl-CoA_dehydrogenase_OS=Achromobacter_sp._MFA1_R4_OX=1881016_GN=SAMN05428937_0258_PE=4_SV=1~~~tr|A0A811H215|A0A811H215_9BURK_L-carnitine_dehydrogenase_OS=Achromobacter_mucicolens_OX=1389922_GN=lcdH_2_PE=4_SV=1~~~tr|A0A446CAG2|A0A446CAG2_9BURK_L-carnitine_dehydrogenase_OS=Achromobacter_agilis_OX=1353888_GN=lcdH_1_PE=4_SV=1~~~tr|A0A2S0IBG9|A0A2S0IBG9_9BURK_…
3	n10301	1	0	39	1	15	0	0	3.78127e-08	0.00047463	0.706187	6.25023	CATCCTGGGCGAAAAGGGCACCGTGCGCGTCGGCGGCGTGGCCGTCAACCGGATCGACGAGTGGAAGTTCGCTGACGAGCATCCTGACGATGGCAAGATCCGCGAAGCCAACTACGAAACCACCTCGGTTTACGGATTTGGCCACCCGCTTTACTACGACAACGTCATTCGCACGCTGCGTGGCGAATGTGAGCCTGAGACGGATGGCCGCGAAGGTCTCCAATCGCTGGCACTGCTGACCGCGATGTACCGCTCGGCACGCGACGGCGTGCGTATCCCCCTCCCTCTGGACTAAACACCATGAGCATCCACTCCACCGCGATCGTTGACGATGGCGCTCAGATCGGCTCGACCACTCGCGTCTGGCATTGGGTCCATGTCTGCTCTGGCGCTGTAATC…	902	tr|A0A0M7CEZ5|A0A0M7CEZ5_ALCXX_Type_IV_secretion_system_protein_virB10_OS=Alcaligenes_xylosoxydans_xylosoxydans_OX=85698_GN=ERS369984_00474_PE=3_SV=1~~~tr|A0A6J4ZPW3|A0A6J4ZPW3_9BURK_Uncharacterized_protein_OS=Achromobacter_insuavis_OX=1287735_GN=LMG26845_01925_PE=3_SV=1~~~tr|A0A7U0EBB0|A0A7U0EBB0_ALCXX_TrbI/VirB10_family_protein_OS=Alcaligenes_xylosoxydans_xylosoxydans_OX=85698_GN=I6I48_11980_PE…
3	n10334	1	0	39	1	15	0	0	3.78127e-08	0.00047463	0.706187	6.25023	CCGGCTCAGGAACGGTCCATTATGAAAACGTGCAACCCCTACGCAAACGAATTATTCGGCC	61
3	n10466	1	0	39	1	15	0	0	3.78127e-08	0.00047463	0.706187	6.25023	GGTGGAAAACGGCACCAGCCCGCCGACGGCATGCGAATGCCGGGGCAAGGGCTGGGCCACC	61	tr|A0A514CTD2|A0A514CTD2_9CAUD_Endolysin_OS=Achromobacter_phage_Motura_OX=2591403_PE=4_SV=1~~~tr|A0A6S7EVF7|A0A6S7EVF7_9BURK_7-carboxy-7-deazaguanine_synthase_OS=Achromobacter_insolitus_OX=217204_GN=queE_1_PE=4_SV=1~~~tr|A0A6S7A3U5|A0A6S7A3U5_9BURK_7-carboxy-7-deazaguanine_synthase_OS=Achromobacter_animicus_OX=1389935_GN=queE_1_PE=4_SV=1~~~tr|A0A811GRZ8|A0A811GRZ8_9BURK_7-carboxy-7-deazaguanine_s…
3	n10476	1	0	39	1	15	0	0	3.78127e-08	0.00047463	0.706187	6.25023	CCGCGTCATCGAAAACGGCATCCGCGACGGCCAGTTCCGCATGGTCGATCCG	52	tr|A0A424WH76|A0A424WH76_ALCXX_TetR/AcrR_family_transcriptional_regulator_OS=Alcaligenes_xylosoxydans_xylosoxydans_OX=85698_GN=DY367_05770_PE=4_SV=1~~~tr|A0A0M7KSQ6|A0A0M7KSQ6_9BURK_HTH-type_transcriptional_repressor_KstR2_OS=Achromobacter_aegrifaciens_OX=1287736_GN=kstR2_6_PE=4_SV=1~~~tr|A0A7D4E1A4|A0A7D4E1A4_9BURK_TetR/AcrR_family_transcriptional_regulator_OS=Achromobacter_pestifer_OX=1353889_G…
3	n10977	1	0	39	1	15	0	0	3.78127e-08	0.00047463	0.706187	6.25023	TGCGGCAAAATACCCTGCCCTCCCGCCCCCATTTCCGCTAGGCATTGGCCCATTC	55	tr|A0A424WEZ5|A0A424WEZ5_ALCXX_Cardiolipin_synthase_B_OS=Alcaligenes_xylosoxydans_xylosoxydans_OX=85698_GN=clsB_PE=3_SV=1~~~tr|A0A5N7ZSR2|A0A5N7ZSR2_9BURK_Cardiolipin_synthase_B_OS=Achromobacter_sp._OX=134375_GN=clsB_PE=3_SV=1~~~tr|A0A6J5CKZ5|A0A6J5CKZ5_ACHDE_Cardiolipin_synthase_B_OS=Achromobacter_denitrificans_OX=32002_GN=clsB_PE=3_SV=1~~~tr|A0A446CXU9|A0A446CXU9_9BURK_Cardiolipin_synthase_B_OS…
3	n11011	1	0	39	1	15	0	0	3.78127e-08	0.00047463	0.706187	6.25023	GCTTTTTGTGCTGTTCGAAGAATGGTACAGGTACGTCGGCTGGCTCCGAAAATACTCGGTGCCTACTGATCCGCTGATGCGCGCATC	87	tr|A0A6S6ZX92|A0A6S6ZX92_9BURK_Ferrichrome_outer_membrane_transporter/phage_receptor_OS=Achromobacter_deleyi_OX=1353891_GN=fhuA_4_PE=3_SV=1~~~tr|A0A3Q9KRA8|A0A3Q9KRA8_9BURK_MFS_transporter_OS=Achromobacter_spanius_OX=217203_GN=ELS24_17665_PE=4_SV=1~~~tr|A0A2N8K9D9|A0A2N8K9D9_9BURK_Phospholipase_A1_OS=Achromobacter_pulmonis_OX=1389932_GN=C1I89_31365_PE=3_SV=1~~~tr|A0A7U0EDI9|A0A7U0EDI9_ALCXX_FAD-d…
3	n11077	1	0	39	1	15	0	0	3.78127e-08	0.00047463	0.706187	6.25023	ACCGTGCCATCGTCGGAAGAAAATACGGGCCTCAGGGCGGCCAGGTCCGACGGCGCGATGT	61	tr|A0A424W7P0|A0A424W7P0_ALCXX_Acetyl-CoA_C-acyltransferase_OS=Alcaligenes_xylosoxydans_xylosoxydans_OX=85698_GN=DY367_23565_PE=3_SV=1~~~tr|A0A6S7ESB3|A0A6S7ESB3_9BURK_Beta-ketothiolase_BktB_OS=Achromobacter_anxifer_OX=1287737_GN=bktB_2_PE=3_SV=1~~~tr|A0A6S7F086|A0A6S7F086_9BURK_Beta-ketothiolase_BktB_OS=Achromobacter_insolitus_OX=217204_GN=bktB_1_PE=3_SV=1~~~tr|A0A446D075|A0A446D075_9BURK_Beta-k…
3	n11230	1	0	39	1	15	0	0	3.78127e-08	0.00047463	0.706187	6.25023	TTCCAGGTCGGGTTGAGTCCGGATGCCGGTCCCGAGATCTGCGCGCGCCAGCAGTGCGTGACGCTGCGCGCGACCACTGGCGAAATCCAGGTACTGCAGTCGGGTGGCATCTGCCTGACCGAGGCCCAGCAAGCTGTTGGTGGTCCGCACGCCATCGCCCCAGTGCCGGGCCACATCCAGTTGCGGACGGGCATCGCCCACGCAGGCCAGACCGGCGAGCAAGGCCCGTTGCGCGAATTCCACAAAATAGCTGCCCGCGACCGTGGGGCTATTGAGGATGACGTCCAAATGGCCGCGCTGGATGTCAGCTTTCATGACGCCAGCAACTTCACGCAGCGCCGGTGCCAGCGAATTGGCGTTGGCCAAGCCATCTTCGAACAGGCTCAAGGCTGCCAAGGC…	467	tr|A0A6S7FAX1|A0A6S7FAX1_9BURK_Uncharacterized_protein_OS=Achromobacter_insolitus_OX=217204_GN=LMG6000_02338_PE=4_SV=1~~~tr|A0A0Q8X898|A0A0Q8X898_9BURK_Methyltransferase_OS=Achromobacter_sp._Root83_OX=1736602_GN=ASE30_26775_PE=4_SV=1~~~tr|A0A246QC50|A0A246QC50_9BURK_Carnitine_dehydratase_OS=Achromobacter_sp._HZ28_OX=2015171_GN=CEY04_10900_PE=4_SV=1~~~tr|A0A2I8DD74|A0A2I8DD74_9BURK_Glycosyltransfe…
3	n11254	1	0	39	1	15	0	0	3.78127e-08	0.00047463	0.706187	6.25023	ATTAAATCCGGCTGAACGGCGGTTATCTTGACCCGAAAATAGTTTCCGCAGCGGAAGAATATTCCGAAATAATGTCGACGC	81
3	n11258	1	0	39	1	15	0	0	3.78127e-08	0.00047463	0.706187	6.25023	CTCGGTGATGATGACGCAGCGGCTCATTTCGCTGAGCGTCACCTCCAGGTACTCGCGCAACGCCAGCTGCAGCTTTTCCAGGCCGGTGCCGCCATGGCGTTCCGCCGCTTCGATGGCCTCGAAGCCCACTCTCAAAGCCTCGGCGAACGCCTCGTACAGCAGGGCGTGCTTGTTCGGAAAATAGTGGTAGAGCGCCGCCTTGGTAACGCCCAGGCTGGTCGCGATGTCTCCCAGC	235	tr|A0A6S7A2S4|A0A6S7A2S4_9BURK_HTH-type_transcriptional_repressor_KstR2_OS=Achromobacter_deleyi_OX=1353891_GN=kstR2_2_PE=4_SV=1~~~tr|A0A246QD72|A0A246QD72_9BURK_Formate_dehydrogenase_OS=Achromobacter_sp._HZ28_OX=2015171_GN=CEY04_01900_PE=3_SV=1~~~tr|A0A4Q1HNQ9|A0A4Q1HNQ9_9BURK_Formate_dehydrogenase_OS=Achromobacter_aloeverae_OX=1750518_GN=C7R54_00555_PE=3_SV=1~~~tr|A0A6N0JLV2|A0A6N0JLV2_ACHDE_Tet…
3	n11448	1	0	39	1	15	0	0	3.78127e-08	0.00047463	0.706187	6.25023	GCCTGTCTTCCTTCAAACGGTTTGGTCGCCCGATGAAGGGTATAAGACTGGCGCTATGCACGCCCTGATCACCTACAAGGCTAAAAGCTTGAGTCCACCCTGTGCAGCAAGCCATTGATTCAGAATGTATTTCCCCAGAAATCCGTGGGGAAACTTCAGAGTCTGACACCTTTATTTGACCTCTAGTCAGCAGCCTTAAAAAAATGCTTATCTAGATCGGCAGGAGGGAACTGACCAGGTAGAATTTTTGACGAAATATCCCTACCAAGTAGCCCTAAAAGAAACTCAACACAGCCACAACTGTAGATTTCTTCTTCCCCTTGATCGGAGCTATGAATAGCAACTCTCCATGAATCTGGCTCTCCGTCAATCAACCAAACAAACGTTTCCCCATTATCT…	1210	tr|A0A0M9IIT3|A0A0M9IIT3_ALCXX_Filamentous_hemagglutinin_OS=Alcaligenes_xylosoxydans_xylosoxydans_OX=85698_GN=fhaB_1_PE=4_SV=1~~~tr|A0A0Q8BZY8|A0A0Q8BZY8_9BURK_Haemagg_act_domain-containing_protein_OS=Achromobacter_sp._Root565_OX=1736564_GN=ASD71_10245_PE=4_SV=1~~~tr|A0A3S9YXI6|A0A3S9YXI6_9BURK_Uncharacterized_protein_OS=Achromobacter_spanius_OX=217203_GN=ELS24_17915_PE=4_SV=1~~~tr|A0A7T4B602|A0A…
3	n11472	1	0	39	1	15	0	0	3.78127e-08	0.00047463	0.706187	6.25023	CTTACATGAAAATCAGACAGAACCGCAGATAAAACCGCGGCCCTTGCTTGGAAACGCGCTGCTTCCAGCCAGACGCCGGCGGC	83	tr|A0A3S4QAK9|A0A3S4QAK9_9BURK_HTH-type_transcriptional_regulator_AbgR_OS=Achromobacter_spanius_OX=217203_GN=abgR_9_PE=3_SV=1~~~tr|A0A3S9YXB9|A0A3S9YXB9_9BURK_LysR_family_transcriptional_regulator_OS=Achromobacter_spanius_OX=217203_GN=ELS24_17745_PE=3_SV=1~~~tr|A0A446CD38|A0A446CD38_9BURK_Tungstate_uptake_system_permease_protein_TupB_OS=Achromobacter_agilis_OX=1353888_GN=tupB_PE=4_SV=1
3	n11503	1	0	39	1	15	0	0	3.78127e-08	0.00047463	0.706187	6.25023	GGAAGCCGATGGCGGCAGCGGCCTGGACAAAATCAGCGACTGCATCGTGCGCGAAGAGCTGAGTTACCTGTCCCAGGCGTTCGCCTCCACCTGGTCGGCCCATACGCATCTGGGCATCTGGCCCATATGGAAAGCAGGCACGCCGGCGCAGAAGGCGCGTTTCCTGGCGCCCGCGCTGGCCGGCCGGAAAGTGGCCGGCTTCGGCCTGAGCGAACCGGACGGCGGCTCCAACGTGCGCGCCATGAAGACCCGGGCCGAACGCGTTGAAGGCGGTTGGCGCCTGCATGGCAGCAAGCTTTACATCACGAATGCGCCCTTTGCCGACTTCCTGCTGGTAGCCGCGCGCACCAGTCCCGACCTCCGTCCTGACTCGATCAGCCTGTTCATCGTCGAACTGCC…	742	tr|A0A0M7LUV8|A0A0M7LUV8_9BURK_Acyl-CoA_dehydrogenase,_short-chain_specific_OS=Achromobacter_aegrifaciens_OX=1287736_GN=ERS370000_05253_PE=3_SV=1~~~tr|A0A6S7CF58|A0A6S7CF58_9BURK_Acyl-CoA_dehydrogenase_OS=Achromobacter_anxifer_OX=1287737_GN=acdA_2_PE=3_SV=1~~~tr|A0A658ADY4|A0A658ADY4_ALCXX_Acyl-CoA_dehydrogenase_OS=Alcaligenes_xylosoxydans_xylosoxydans_OX=85698_GN=DAI43_10735_PE=3_SV=1~~~tr|A0A0M…
3	n11637	1	0	39	1	15	0	0	3.78127e-08	0.00047463	0.706187	6.25023	CTATGCCAAAATCCCGCCCATGCCGACCGACAACCAACTGACTCCCCTAGCCCTCGCCGCCCAGACGGCGCAACTGCCC	79
3	n11659	1	0	39	1	15	0	0	3.78127e-08	0.00047463	0.706187	6.25023	CAACGCGAACTCCGCGGCAGGAAAATCCTACCAGCCCAGTTTGAAGCATCAGGATTATTCC	61	tr|A0A0M7KBS6|A0A0M7KBS6_9BURK_Domain_of_uncharacterized_function_(DUF1852)_OS=Achromobacter_aegrifaciens_OX=1287736_GN=ERS370000_04151_PE=4_SV=1~~~tr|A0A658A7P9|A0A658A7P9_ALCXX_DUF1852_domain-containing_protein_OS=Alcaligenes_xylosoxydans_xylosoxydans_OX=85698_GN=DAI43_25425_PE=4_SV=1~~~tr|A0A095WLG8|A0A095WLG8_9BURK_Uncharacterized_protein_OS=Achromobacter_sp._RTa_OX=1532557_GN=JL37_25810_PE=4…
3	n11757	1	0	39	1	15	0	0	3.78127e-08	0.00047463	0.706187	6.25023	TTTCCGGGCGCAAGGTAAAATCCGCCCCCCCATGCGCTATTCCGACTTCGACCAA	55
3	n11823	1	0	39	1	15	0	0	3.78127e-08	0.00047463	0.706187	6.25023	AGGACGTATGGATGAGGAAAATCCGGGCTGTACTTCGGTTTGGTGAAGTAGAGTTCTTGAG	61
3	n11977	1	0	39	1	15	0	0	3.78127e-08	0.00047463	0.706187	6.25023	GCCTGGTAGTCCTGGAAAATCTGGTCGGCGCTGCGGTCGGGATCGTAGTTCGCAAAGAACA	61	tr|A0A6S7FAX1|A0A6S7FAX1_9BURK_Uncharacterized_protein_OS=Achromobacter_insolitus_OX=217204_GN=LMG6000_02338_PE=4_SV=1~~~tr|A0A1R1JKD1|A0A1R1JKD1_ALCXX_Chemotaxis_protein_OS=Alcaligenes_xylosoxydans_xylosoxydans_OX=85698_GN=BIZ92_17795_PE=4_SV=1~~~tr|A0A446CEM6|A0A446CEM6_9BURK_Chromosome_partition_protein_Smc_OS=Achromobacter_veterisilvae_OX=2069367_GN=smc_1_PE=4_SV=1~~~tr|A0A2I8DTW3|A0A2I8DTW3_…
3	n12035	1	0	39	1	15	0	0	3.78127e-08	0.00047463	0.706187	6.25023	TTGCCGACGCCAAGGAGAAAATCGACGCCTAGCGGACGTACTATAACGAGGTTCGTCCCCA	61	tr|A0A6S7F7W6|A0A6S7F7W6_9BURK_IS3_family_transposase_ISRso16_OS=Achromobacter_insolitus_OX=217204_GN=LMG6000_03726_PE=4_SV=1~~~tr|J4YM45|J4YM45_9BURK_Transposase_OS=Achromobacter_marplatensis_OX=470868_GN=QWC_10119_PE=4_SV=1~~~tr|A0A427X093|A0A427X093_ACHDE_ClcB-like_voltage-gated_chloride_channel_protein_OS=Achromobacter_denitrificans_OX=32002_GN=FOC81_28225_PE=4_SV=1~~~tr|A0A5N7ZHM6|A0A5N7ZHM6…
3	n12085	1	0	39	1	15	0	0	3.78127e-08	0.00047463	0.706187	6.25023	ATACGGAGGCCAACGTCTTTGCTCGACATAAGGCGACAGTATCGCATGGATACACAATTGTGTATCCAAAAAATCGCACCCGTCGCATAAGTCCTAAGTTGTGCGACAGCTTGCCATGTCATTTTCAGAAGACGACTGCACGGAA	145	tr|A0A246Q9V7|A0A246Q9V7_9BURK_5-oxoprolinase_OS=Achromobacter_sp._HZ28_OX=2015171_GN=CEY04_10195_PE=4_SV=1~~~tr|A0A2N8KGD0|A0A2N8KGD0_9BURK_Tripartite_tricarboxylate_transporter_substrate_binding_protein_OS=Achromobacter_pulmonis_OX=1389932_GN=C1I89_15620_PE=3_SV=1~~~tr|A0A4Q1HGZ0|A0A4Q1HGZ0_9BURK_Capsular_biosynthesis_protein_OS=Achromobacter_aloeverae_OX=1750518_GN=C7R54_16970_PE=4_SV=1
3	n12240	1	0	39	1	15	0	0	3.78127e-08	0.00047463	0.706187	6.25023	AAAATCGTCGGCAACATCATCACCACGGTTTCACGATGCCCAAGCAGTTGTCCG	54
3	n12306	1	0	39	1	15	0	0	3.78127e-08	0.00047463	0.706187	6.25023	CGTCACCAGTTGCTGGTGCACGAAGCCGCCGCGTCCATTGCGCACCCGGAACGAGAAAATCGGCAGGCGCGCCGCCGTCAGCGAACCCAGCAGCTCCAGCTGCGCGACGCCTTGCCATCTGGCCAGCGCACGCTCCACGAAGTGTTGATTGCGCTGGCGCATGAAGTCGGCGCCCAGG	178	tr|A0A658A876|A0A658A876_ALCXX_Aminotransferase_(Fragment)_OS=Alcaligenes_xylosoxydans_xylosoxydans_OX=85698_GN=DAI43_24315_PE=4_SV=1~~~tr|A0A7D4IKX2|A0A7D4IKX2_9BURK_Aminotransferase_class_V-fold_PLP-dependent_enzyme_OS=Achromobacter_pestifer_OX=1353889_GN=FOC84_24605_PE=4_SV=1~~~tr|A0A0M9ID17|A0A0M9ID17_9BURK_Probable_cysteine_desulfurase_OS=Achromobacter_aegrifaciens_OX=1287736_GN=csd_PE=4_SV=…
3	n12515	1	0	39	1	15	0	0	3.78127e-08	0.00047463	0.706187	6.25023	CGCCGCGAAACCCTCCGTGTGCATCAGCGCGAGGCCGCAGATCGCGCCGGCGAACCAGCCGGCCAGGCCGGCGCGGTTGAAGGCCGCGCCGCCGCCGTGCTGCGGCTCGGATTCCTGGCCGCCCAAGATGTGCACTAGCGCCACCGCCACCCACGACACCACGAAAATTCCCTGGTAGGCCAGCGCCTGCAGCAGATACGAGAACACGTCC	211	tr|A0A5N7ZKV2|A0A5N7ZKV2_9BURK_ABC_transporter_ATP-binding_protein_OS=Achromobacter_sp._OX=134375_GN=E2603_05515_PE=4_SV=1~~~tr|A0A3R9HUP4|A0A3R9HUP4_ACHDE_ABC_transporter_ATP-binding_protein_OS=Achromobacter_denitrificans_OX=32002_GN=FOC81_00505_PE=4_SV=1~~~tr|A0A6S7DGW9|A0A6S7DGW9_9BURK_Chaperone_protein_ClpB_OS=Achromobacter_dolens_OX=1287738_GN=clpB_PE=3_SV=1~~~tr|A0A6S7EFZ4|A0A6S7EFZ4_9BURK_…
3	n12570	1	0	39	1	15	0	0	3.78127e-08	0.00047463	0.706187	6.25023	GACGTTTCCATGTGGTGAGGAAAATTCTGTCCTGGCGGCTGAAAGGCGACAAATGATGAAT	61	tr|A0A446C784|A0A446C784_9BURK_Uncharacterized_protein_OS=Achromobacter_agilis_OX=1353888_GN=AGI3411_01253_PE=3_SV=1
3	n12581	1	0	39	1	15	0	0	3.78127e-08	0.00047463	0.706187	6.25023	GAGTTTGATGAGGGTGCAAAATTCGATTGATGGCTGTTCGGAGCGATAGAGTTGCGGTTTT	61	tr|A0A5N7ZTV9|A0A5N7ZTV9_9BURK_Aldehyde_dehydrogenase_OS=Achromobacter_sp._OX=134375_GN=E2603_12095_PE=4_SV=1
3	n12627	1	0	39	1	15	0	0	3.78127e-08	0.00047463	0.706187	6.25023	CACGCCCTACATGCACAACCTGAACATGGGCTGCTTCTTCGGTCCATTCCTGTTGAGCGGCGCTCAGGTCACCGTATGCCGCAGCCTGGACGAAGCCACCTTGCAGGGCTTGGTGCGGACTTACCGGCCCACCTGGTTCGGCGTGGCGGGCCCGATCCTGACCCGCATCCTGCCCGAGCTGGACCGCGCGGACGCCAGCGTAAAGGCGCGCCGCCGTTTCATTACGCCTCGCAACGCCGCGGGCCTGGCCAGAACCACCGGATCGCCCGCATTCCATATCTTCGGCATGACCGAGGGCGTCATCATGTTCGCCAAGGAGGGCGACAGCGCGAACGTGCTCGAAAATTCGGTCGGCCGGCCGGTTTCGGGCCACGACGAGGTCCGGATCGTGACGCCCGG…	559	tr|A0A6S7ERJ8|A0A6S7ERJ8_9BURK_Malonyl_CoA-acyl_carrier_protein_transacylase_OS=Achromobacter_ruhlandii_OX=72557_GN=dltA_4_PE=4_SV=1~~~tr|A0A0M7C5I2|A0A0M7C5I2_ALCXX_Malonyl_CoA-acyl_carrier_protein_transacylase_OS=Alcaligenes_xylosoxydans_xylosoxydans_OX=85698_GN=ERS369984_00323_PE=4_SV=1~~~tr|A0A7U0EDH7|A0A7U0EDH7_ALCXX_Malonyl_CoA-acyl_carrier_protein_transacylase_OS=Alcaligenes_xylosoxydans_x…
3	n12654	1	0	39	1	15	0	0	3.78127e-08	0.00047463	0.706187	6.25023	GGCGGCGTCGCTCTTGAAAATTTCCATCCCGCTGCCTTCAGGCAAGCGGATGTCGGTCAGC	61	tr|A0A2S5GYT8|A0A2S5GYT8_9BURK_Sigma-54-dependent_Fis_family_transcriptional_regulator_OS=Achromobacter_spanius_OX=217203_GN=C4E15_02480_PE=4_SV=1~~~tr|A0A0M7HR34|A0A0M7HR34_9BURK_Regulatory_protein_luxO_OS=Achromobacter_aegrifaciens_OX=1287736_GN=luxO_2_PE=4_SV=1~~~tr|A0A658AFB6|A0A658AFB6_ALCXX_Sigma-54-dependent_Fis_family_transcriptional_regulator_OS=Alcaligenes_xylosoxydans_xylosoxydans_OX=8…
3	n12656	1	0	39	1	15	0	0	3.78127e-08	0.00047463	0.706187	6.25023	ATCCAATGCAAGTACGGTTCATGCGCAAAATTTCCTCAGGTGGCATTGATCAATGGGCAGTAC	63	tr|D4XHF6|D4XHF6_9BURK_ALP_N_domain-containing_protein_OS=Achromobacter_piechaudii_ATCC_43553_OX=742159_GN=HMPREF0004_4903_PE=4_SV=1
3	n12771	1	0	39	1	15	0	0	3.78127e-08	0.00047463	0.706187	6.25023	TTCACAAAATTGACATTTGTCTGAATAAATCCTGACTATTTGTTGAACGTAAAAATAAGAA	61
3	n12799	1	0	39	1	15	0	0	3.78127e-08	0.00047463	0.706187	6.25023	CTGCGAGCCGTCAAAATTGCAGATCAAGGCCGGTCAGAAAGGGCGGGTGGAACTGCTGCTGACCTTCCAC	70	tr|A0A7Y4K6Y5|A0A7Y4K6Y5_9BURK_YgeY_family_selenium_metabolism-linked_hydrolase_OS=Achromobacter_deleyi_OX=1353891_GN=HLG70_10310_PE=4_SV=1~~~tr|A0A424W5U2|A0A424W5U2_ALCXX_YgeY_family_selenium_metabolism-linked_hydrolase_OS=Alcaligenes_xylosoxydans_xylosoxydans_OX=85698_GN=DY367_27300_PE=4_SV=1~~~tr|A0A6S7F5X0|A0A6S7F5X0_9BURK_Succinyl-diaminopimelate_desuccinylase_OS=Achromobacter_insolitus_OX=…
3	n12968	1	0	39	1	15	0	0	3.78127e-08	0.00047463	0.706187	6.25023	GGAAACCGCCATCCACAAAATGACCGGCCTGGCCGCGGACCAATACGGCATCGCCGAGCGC	61	tr|A0A246Q9P7|A0A246Q9P7_9BURK_D-aminoacylase_OS=Achromobacter_sp._HZ28_OX=2015171_GN=CEY04_10155_PE=4_SV=1~~~tr|A0A4Q1HIL7|A0A4Q1HIL7_9BURK_D-aminoacylase_OS=Achromobacter_aloeverae_OX=1750518_GN=C7R54_15090_PE=4_SV=1~~~tr|A0A446C8J5|A0A446C8J5_9BURK_D-aminoacylase_OS=Achromobacter_veterisilvae_OX=2069367_GN=dan_1_PE=4_SV=1~~~tr|A0A2N8KF53|A0A2N8KF53_9BURK_D-aminoacylase_OS=Achromobacter_pulmoni…
3	n13017	1	0	39	1	15	0	0	3.78127e-08	0.00047463	0.706187	6.25023	CCACAGCCCTTCACGGAAGAAGCGCGCGAAAATGATGACCAGCAGCGCGAACACGATCATC	61	tr|A0A2I8DJ21|A0A2I8DJ21_9BURK_Metal-dependent_hydrolase_OS=Achromobacter_sp._AONIH1_OX=1758194_GN=C2U31_12585_PE=4_SV=1~~~tr|A0A6N0JPL1|A0A6N0JPL1_ACHDE_Branched-chain_amino_acid_ABC_transporter_ATP-binding_protein/permease_OS=Achromobacter_denitrificans_OX=32002_GN=FOC81_21165_PE=4_SV=1~~~tr|A0A0Q8BCE4|A0A0Q8BCE4_9BURK_ABC_transporter_domain-containing_protein_OS=Achromobacter_sp._Root565_OX=17…
3	n13137	1	0	39	1	15	0	0	3.78127e-08	0.00047463	0.706187	6.25023	CATTCAAGCTCATTTCCGTGCTCACATTGCATTCTCGATTGAAGACGTTGCGCAGAGCGTCGATCAAATGCCTGGCGTTGGCGGTGGGTGAAAGCACAACGTGCTTAGCGCTGGCTCATGACTATCTGAACGGCCGGTGACCAGCCTTACACAGTCTTGCCATGCACTGTTGTTACTTGGAAGGCCATGCCGCGTCAGCGGCGTGGCCTTCCGGACGGGGCCTATCCCACATGTGCCGGCTTCTGCTCTTCTGCCTGGCGCGCCGCCTCTGCTTCAGCGGATAGCTTCTGCACACGCACCTCATTTGTGCCCGAATCGTAGGTAATCGTTACCTTGTCCCCGTCTCGCATGTCGCCCCGTAGCAATGCATCGGCAATTTTCGATTCCACCTCCGCCCGA…	2097	tr|A0A2I8DE46|A0A2I8DE46_9BURK_Histidine_kinase_OS=Achromobacter_sp._AONIH1_OX=1758194_GN=C2U31_04880_PE=4_SV=1~~~tr|D4X3F8|D4X3F8_9BURK_ATPase_family_associated_with_various_cellular_activities_(AAA)_(Fragment)_OS=Achromobacter_piechaudii_ATCC_43553_OX=742159_GN=HMPREF0004_0005_PE=3_SV=1~~~tr|A0A5K6EIT8|A0A5K6EIT8_ALCXX_ATP-dependent_Clp_protease_ATP-binding_subunit_OS=Alcaligenes_xylosoxydans_x…
3	n13325	1	0	39	1	15	0	0	3.78127e-08	0.00047463	0.706187	6.25023	GGCGCCGCCGCCATGGACGAGCATTTCCGCACCGCGCCCATCGAGGAAAATGCGCCCGTCCAGCTGGCGCTGGCCGGCGTCGTAAACCGCAGCGTGCTGGGCTACGATTCACTGGTGATTGCACCCTACGATTCGCGGCTCTACCACATCGTACCCTGGGCCCAGCAGTTGGAAATGGAATCGCTGGGCAAGGTCGCCA	199	tr|A0A6S7FAZ2|A0A6S7FAZ2_9BURK_Hippurate_hydrolase_OS=Achromobacter_insolitus_OX=217204_GN=hipO_6_PE=4_SV=1~~~tr|A0A4Q1HFW3|A0A4Q1HFW3_9BURK_Hydantoinase_OS=Achromobacter_aloeverae_OX=1750518_GN=C7R54_19380_PE=4_SV=1~~~tr|A0A0L8ERB5|A0A0L8ERB5_9BURK_Glucose-6-phosphate_isomerase_OS=Achromobacter_sp._DMS1_OX=1688405_GN=pgi_PE=3_SV=1~~~tr|A0A6S7F5S6|A0A6S7F5S6_9BURK_Glucose-6-phosphate_isomerase_OS…
3	n13439	1	0	39	1	15	0	0	3.78127e-08	0.00047463	0.706187	6.25023	AGTCGATTAATAATCAAAAGCGCCGCCTGGAGATTATTTAAAACAGAGGGCGACCGACTTTCGAAATGCTTTCTTTCGGGTTTCAGGAATTAACTTCCGTGTGATTCGTTGTTATCAAGATTAAATTCGAATATTGATTTAAAGGTGCAGCCAGATAATCCATTTGCCTGCCCTTCCGAATCCCGCAGCCTGCATTTCGTCGGCAGTTGAAAGTTAAAATAATCAGGATTTCTAAAATGTATGAATCCTCTTTTCTTGTTGTATGAAATTTCATATGAAAAC	282	tr|A0A6S6ZVS1|A0A6S6ZVS1_9BURK_Uncharacterized_protein_OS=Achromobacter_animicus_OX=1389935_GN=LMG26690_02561_PE=4_SV=1~~~tr|A0A3C1Y0X7|A0A3C1Y0X7_9BURK_Uncharacterized_protein_OS=Achromobacter_sp._OX=134375_GN=DCR74_16685_PE=4_SV=1
3	n13533	1	0	39	1	15	0	0	3.78127e-08	0.00047463	0.706187	6.25023	TGGAGCGGGAGGAATTGTAGACCGATAGCCGCATTTCCAAGGCCATCAAAATGGACCCAAGCGCAGATCGTGTTAAATGCGGGCTTCGCCCTACGAACGGAAGTACTCCGCAAT	114	tr|A0A8B5V0U7|A0A8B5V0U7_9BURK_Transcriptional_regulator_GlxA_family_with_amidase_domain_OS=Achromobacter_sp._SLBN-14_OX=2768442_GN=FBY20_4640_PE=4_SV=1~~~tr|A0A811GRE9|A0A811GRE9_9BURK_HTH-type_transcriptional_regulator_CdhR_OS=Achromobacter_mucicolens_OX=1389922_GN=cdhR_3_PE=4_SV=1~~~tr|A0A0M7JSC1|A0A0M7JSC1_9BURK_Uncharacterized_protein_OS=Achromobacter_aegrifaciens_OX=1287736_GN=ERS370000_039…
3	n13774	1	0	39	1	15	0	0	3.78127e-08	0.00047463	0.706187	6.25023	CAGCAGGTCGGTGGCCCCGCCCGCCGAAAATGGGACGATCATGCGTATGACCTTGTCCGCC	61	tr|A0A6S6ZL31|A0A6S6ZL31_9BURK_Uncharacterized_protein_OS=Achromobacter_deleyi_OX=1353891_GN=LMG3458_01232_PE=3_SV=1~~~tr|A0A0M7GGL5|A0A0M7GGL5_9BURK_Argininosuccinate_lyase_OS=Achromobacter_aegrifaciens_OX=1287736_GN=ERS370000_02146_PE=3_SV=1~~~tr|A0A658A9D7|A0A658A9D7_ALCXX_ABC_transporter_substrate-binding_protein_OS=Alcaligenes_xylosoxydans_xylosoxydans_OX=85698_GN=DAI43_30420_PE=3_SV=1~~~tr|…
3	n13792	1	0	39	1	15	0	0	3.78127e-08	0.00047463	0.706187	6.25023	CTGCTCGACCGGCTGAACTACCTGGCCGATGCCGAATATGCCGGGCTGTTCGACGCGAATCCCTACCATAGTTGAGGGATGACGTATGGCGTTCATCATCGCGGCGGTTCTCGGTGTCATCGCCCTGGCGTGGTTCCTGCGGCGGCTGTTCCCTGCCCTGTTTGCGGCGGTGTTCGTCCTGTTCGCGCCGGTATGGCTGGTCGGCGGTGCGCTGCTCGATCTGCTGCGCCGGCCGCTGGCCTTCCTGCGGCCGGTCGGCCTCGCCCTGGCCCGCCTGGTCGGCTTCGTCCTGGTGCTGCCGCTGCTGCCCTTCATCTTCGCCTGGTCGTTCTTCGCGGAACTGTGGCGACAGTTCCGGCCAAAGGCCAGCCCGGCCCCGGCCGGGGTCAAGCCGCCCAC…	1033	tr|T2K1B1|T2K1B1_ACHDE_Partitioning_protein_OS=Achromobacter_denitrificans_OX=32002_GN=kfrA_PE=4_SV=1~~~tr|A0A193PMV8|A0A193PMV8_ALCXX_KfrA_protein_OS=Alcaligenes_xylosoxydans_xylosoxydans_OX=85698_GN=kfrA_PE=4_SV=1~~~tr|A0A193PMN2|A0A193PMN2_ALCXX_Uncharacterized_protein_OS=Alcaligenes_xylosoxydans_xylosoxydans_OX=85698_PE=4_SV=1~~~tr|A0A2N8K8G9|A0A2N8K8G9_9BURK_KfrA_OS=Achromobacter_pulmonis_OX…
3	n13986	1	0	39	1	15	0	0	3.78127e-08	0.00047463	0.706187	6.25023	TCCGGGCAAAAGAATGGTGGCGCCCAAGTATCGTCACCCTGACACTGGTGAAACCTGGTCGGGG	64	tr|A0A4Q1HDE9|A0A4Q1HDE9_9BURK_MATE_family_efflux_transporter_OS=Achromobacter_aloeverae_OX=1750518_GN=C7R54_26525_PE=4_SV=1~~~tr|A0A1N7P3P2|A0A1N7P3P2_9BURK_DNA-binding_protein_H-NS_OS=Achromobacter_sp._MFA1_R4_OX=1881016_GN=SAMN05428937_0441_PE=3_SV=1~~~tr|A0A3C1XRU7|A0A3C1XRU7_9BURK_DNA-binding_protein_(Fragment)_OS=Achromobacter_sp._OX=134375_GN=DCR74_00150_PE=3_SV=1~~~tr|A0A424WFX7|A0A424WFX…
3	n14072	1	0	39	1	15	0	0	3.78127e-08	0.00047463	0.706187	6.25023	GCAGATTTTCAAAAGACAAGATAAGGCTCCGGCAAGACGCGGCGCACGCTTGCGCCAGCGA	61	tr|A0A0L8EKA0|A0A0L8EKA0_9BURK_Proton-translocating_NAD(P)(+)_transhydrogenase_OS=Achromobacter_sp._DMS1_OX=1688405_GN=AD428_23845_PE=4_SV=1
3	n14207	1	0	39	1	15	0	0	3.78127e-08	0.00047463	0.706187	6.25023	GTTGGCTGGATGACCGATGAAAAGACGAACCTCCTCACGCCGCTGCGCTTGGCCGCGTCGA	61	tr|A0A7D4HR77|A0A7D4HR77_9BURK_NAD-dependent_epimerase/dehydratase_family_protein_OS=Achromobacter_pestifer_OX=1353889_GN=FOC84_13800_PE=4_SV=1~~~tr|A0A0M7I734|A0A0M7I734_9BURK_NAD(P)H_azoreductase_OS=Achromobacter_aegrifaciens_OX=1287736_GN=azoB_PE=4_SV=1~~~tr|A0A658AEV2|A0A658AEV2_ALCXX_Epimerase_OS=Alcaligenes_xylosoxydans_xylosoxydans_OX=85698_GN=DAI43_07650_PE=4_SV=1~~~tr|E3HW11|E3HW11_ACHXA…
3	n14240	1	0	39	1	15	0	0	3.78127e-08	0.00047463	0.706187	6.25023	GGCATTGAGCACCTGGCTCAGCGGGCCGCCGGCAATGTCGTAGCTGCGCCTGGTCTCGACGCTCTGCGCCTGCGCGGTGGCGGTCGCGCCAGGGATGACGCAGAACGCCACGCTGAGAAACAGCGCCAGGCGCATCAGGCGGGGAATCGCGGGGCGGGGCGCTGGCGTGGCTGGCGCGTGGGAATGGGACCTGGGCTGCGGGTGACGGGACATTGGGTGATGCCTTGCGGTTCGTGCTGGAGATGAAAGGGGGTCACCCTATATCCCGAGCAAGAACGCCGAATCCGCAATTGCCGCCTCGAAAAGTTTGTAACGGCGACAGCCGATTGGCCGTCATTGCGCTGCCTGCACTGTCACCCAGTAGCGCGTCCGGTAGCTCACCGCCACCGGCAGAGCCCG…	484	tr|A0A6S6ZQ13|A0A6S6ZQ13_9BURK_Protein_FecR_OS=Achromobacter_animicus_OX=1389935_GN=fecR_4_PE=4_SV=1~~~tr|A0A7T4E5R9|A0A7T4E5R9_9BURK_TonB-dependent_siderophore_receptor_OS=Achromobacter_deleyi_OX=1353891_GN=I6I07_09810_PE=4_SV=1~~~tr|A0A7D4HRR4|A0A7D4HRR4_9BURK_TonB-dependent_siderophore_receptor_OS=Achromobacter_pestifer_OX=1353889_GN=FOC84_15710_PE=3_SV=1~~~tr|A0A6S7DV90|A0A6S7DV90_9BURK_Ferri…
3	n14344	1	0	39	1	15	0	0	3.78127e-08	0.00047463	0.706187	6.25023	AGAACGATTGAATTCGCATGTGGATATTTGCTTTCTGTTCGCGCCAGGGGACAGGAGGCATCCGCATATTCATATCTGAAAGTCTTCTTTGCTCCTGGGCCAACCCGCAAGCAGCATGGTGGTCCGTTCAAAGCACATCCCTCTACAACGACATGACGACTCGCAAGACTCCGGGCGGCGCCCGCATCGCATTCTCCCTGGCGCTGGCCCTGGCCGCCGGCGCGGCGCAGGCCGACGCCACGCTGGAAAAGATCAAGGAACGCGGCACCATCACCATAGGCGTGCTGGCCAATGGCGGCG	300	tr|A0A6S7EQT0|A0A6S7EQT0_9BURK_PBPb_domain-containing_protein_OS=Achromobacter_ruhlandii_OX=72557_GN=LMG3328_05485_PE=4_SV=1~~~tr|J4QY52|J4QY52_9BURK_Class_III_aminotransferase_OS=Achromobacter_marplatensis_OX=470868_GN=QWC_02354_PE=3_SV=1~~~tr|A0A366FNS6|A0A366FNS6_9BURK_4-aminobutyrate_aminotransferase-like_enzyme_OS=Achromobacter_marplatensis_OX=470868_GN=DFP87_11161_PE=3_SV=1~~~tr|A0A6S7B843|…
3	n14436	1	0	39	1	15	0	0	3.78127e-08	0.00047463	0.706187	6.25023	TGGGCGGCGGCCAGTTGGCCGCGCAGCTCGGTAGCTTCGCCGCGTGCGGTCGCTTCGGCGGCCTCGATGGACGCCAGGCGGGATTGCAAGGCTTCCAGCTCGCCGGCCTGACGCTCGAAAGCCTCGGCCAGCTCTTGCCGCATGGCGTCTTGCTCTGCCCGCTCGGTTTCCCATGCGGCCTGTGCGCTGCGCAGGGATTCGTTCGCCAGCTCCTGGGCCTGCTGCCAGATCGTCGCCACGGCGGCGCTGCTGGCCTGCTGCACGGATTCCGGCACGGCTACGGCCACCGGCGCGGCCTGGGCCGTCTGCGCCCTGCGCCATTCCTTCATCACGGCACTGGCGGCGTTCATGTCCACGCGGGCGGCACGGCGCACGGCATCGACCGTGGGCATCGTCTCG…	1047	tr|T2K1B1|T2K1B1_ACHDE_Partitioning_protein_OS=Achromobacter_denitrificans_OX=32002_GN=kfrA_PE=4_SV=1~~~tr|A0A193PMV8|A0A193PMV8_ALCXX_KfrA_protein_OS=Alcaligenes_xylosoxydans_xylosoxydans_OX=85698_GN=kfrA_PE=4_SV=1~~~tr|A0A2N8K8G9|A0A2N8K8G9_9BURK_KfrA_OS=Achromobacter_pulmonis_OX=1389932_GN=C1I89_33000_PE=4_SV=1~~~tr|A0A0D5A106|A0A0D5A106_9BURK_KfrA_protein_OS=Achromobacter_sp._LM16_OX=1449778_…
3	n14457	1	0	39	1	15	0	0	3.78127e-08	0.00047463	0.706187	6.25023	CAAAAGATTGCCTCTTCAACGGGCAAAAAAACCAACCAAGGAGACAACCATGAAGACTAGG	61	tr|A0A6S6ZMI0|A0A6S6ZMI0_9BURK_Toxin_RTX-I_translocation_ATP-binding_protein_OS=Achromobacter_deleyi_OX=1353891_GN=apxIB_PE=4_SV=1~~~tr|A0A4Q1HNP7|A0A4Q1HNP7_9BURK_Type_I_secretion_system_permease/ATPase_OS=Achromobacter_aloeverae_OX=1750518_GN=C7R54_02525_PE=4_SV=1
3	n14536	1	0	39	1	15	0	0	3.78127e-08	0.00047463	0.706187	6.25023	TAGAAAAGAGCAAAAATTGTGGCATAGAGCGCCTGCCCGCACAAACCCGGCGGGCATATCAACCGGAGCGCCTGGCGCGCATGCTGGAAAGATAGCCGCGTATGGTTTCCTGCACGCCGGGCCTGGCGAAGTTTTCGTGCATCAGGGGCTCGAGCGCTTCGATGCGTCCGACGGCGCAATCGGGCGGCTCCAGCAACAAACGCGCCTTGCGGGCAATGACCAGCGCCTCGCGGCGCGCGATGTAGAACGCCAGGCGCTCGGCGGAAAGCCGCTCGAAGTCCTCGGTCGGCAACACATCGGTCACCAGTCCCAGGTCGCGGGCGGGCTCGGCCTTCAGCAGTTGGCCGCTGAGGCACAACTGGCGGGCCCGCGCGCCGCTGATCTTGGTTTCCAGGGCGG…	515	tr|A0A446CQQ0|A0A446CQQ0_9BURK_Short-chain-enoyl-CoA_hydratase_OS=Achromobacter_veterisilvae_OX=2069367_GN=crt_10_PE=4_SV=1~~~tr|A0A6S7F819|A0A6S7F819_9BURK_Crotonyl-CoA_hydratase_OS=Achromobacter_insolitus_OX=217204_GN=LMG6000_01475_PE=4_SV=1~~~tr|A0A6S7E0P3|A0A6S7E0P3_9BURK_Crotonyl-CoA_hydratase_OS=Achromobacter_anxifer_OX=1287737_GN=LMG26858_03707_PE=4_SV=1~~~tr|A0A424WBP1|A0A424WBP1_ALCXX_En…
3	n14567	1	0	39	1	15	0	0	3.78127e-08	0.00047463	0.706187	6.25023	TGGACAGTTATGGCTGTGTCTCACCCTAGGCGATAAAAGAGCTGAAGCAGTGCCGTGAGTATCCCTATGCTGGCATGGAGATATTTGACTGACAGCAATGGGTCGAGAAAGGTCATTCGGATCCGGCGGCTCTCGGCCAGAAGCCGACAGTCATCAGGGTCCCCGAGCAGCACAGTGCCGCAACGCGAGATGAGCGCGGGGCAAGCCTATACACATTTGTTACCTTTCAAGTCCATTGAGC	241	tr|A0A2S8V7L7|A0A2S8V7L7_9BURK_Mechanosensitive_ion_channel_protein_MscS_OS=Achromobacter_sp._MYb9_OX=1827284_GN=CQ050_20875_PE=3_SV=1~~~tr|A0A6S7AMU7|A0A6S7AMU7_9BURK_Uncharacterized_protein_OS=Achromobacter_deleyi_OX=1353891_GN=LMG3458_05251_PE=4_SV=1~~~tr|A0A0Q8XD45|A0A0Q8XD45_9BURK_ATP-dependent_RNA_helicase_HrpA_OS=Achromobacter_sp._Root83_OX=1736602_GN=ASE30_08570_PE=4_SV=1~~~tr|A0A7X9ZE93|…
3	n14630	1	0	39	1	15	0	0	3.78127e-08	0.00047463	0.706187	6.25023	CGCCATGCGCTTCAGCGACCGGCAGGTCATCGTGTCGAACGAGACGCCGGTCACGGTGCAGCGCCCCGGCAGCGGCGGCGCCATTGCGCGCATCGAGCTGCTGCGCATCCTGGGCGTACACGCCAGGCGGTTGGGCGTGGATGTGCGCTACCAGGAACGGATCGATGATTTCCAGGCGCTCGATGCCGATGTGGTGGTGGGCGCGGACGGGATCAATTCCCGGGTGCGTGACAGTGACGAGTGCGGGTTCGACGTGCACCGGTACAGCCTCACAAACCATTTCGCCTGGTATGGCGTCGCAAAGGCCTTCCCATCCCCAAGCCTGGTGTTCCGCAAGCACGGCGCTGGTTACTTTGTGGCGCACTACTACCCCTATTCGGCATCCATGAGCACCTTCGT…	1466	tr|J4J8G0|J4J8G0_9BURK_Monooxygenase,_FAD-binding_protein_OS=Achromobacter_marplatensis_OX=470868_GN=QWC_05714_PE=4_SV=1~~~tr|A0A366GAW7|A0A366GAW7_9BURK_2-polyprenyl-6-methoxyphenol_hydroxylase-like_FAD-dependent_oxidoreductase_OS=Achromobacter_marplatensis_OX=470868_GN=DFP87_101506_PE=4_SV=1~~~tr|A0A0M7IAY6|A0A0M7IAY6_9BURK_3-hydroxybenzoate_6-hydroxylase_1_OS=Achromobacter_aegrifaciens_OX=1287…
3	n14656	1	0	39	1	15	0	0	3.78127e-08	0.00047463	0.706187	6.25023	TTGGCATGCTAATTATTGATATTGATTGCCACAAAAGCAATTCATAGAATGGGCCGACCAGGGCCGCCAGGATACAAGGGCAACAGACCCGCC	93	tr|A0A658AGS8|A0A658AGS8_ALCXX_Tripartite_tricarboxylate_transporter_substrate_binding_protein_OS=Alcaligenes_xylosoxydans_xylosoxydans_OX=85698_GN=DAI43_12185_PE=3_SV=1
3	n14756	1	0	39	1	15	0	0	3.78127e-08	0.00047463	0.706187	6.25023	ATTTGGGACGCCTTCGGATGAACGCCAGGAGAGAAGATACCCGCCGGAAAATCCAGCTCGGCGGCTTGGTCATAAAGTCCGGCATGTCGGGCTATCCGGCGTCTGTGATTTTGGGCGCTTTGACCCTCGCGGCCGGTGCGCTAAATGGGCCAAACGCTGACGCTACAAAAGCACGCTTTGAGGCGGCAGGCGATGAGGCTTTTTCCGATGATGGAGAG	218	tr|A0A4Q1HQP1|A0A4Q1HQP1_9BURK_LysR_family_transcriptional_regulator_OS=Achromobacter_aloeverae_OX=1750518_GN=C7R54_04595_PE=3_SV=1~~~tr|A0A246Q6Y2|A0A246Q6Y2_9BURK_LysR_family_transcriptional_regulator_OS=Achromobacter_sp._HZ28_OX=2015171_GN=CEY04_15210_PE=3_SV=1~~~tr|A0A0D5A0Y5|A0A0D5A0Y5_9BURK_Conjugal_transfer_protein_TraD_OS=Achromobacter_sp._LM16_OX=1449778_GN=pLM16A1_p16_PE=4_SV=1~~~tr|A0A…
3	n14798	1	0	39	1	15	0	0	3.78127e-08	0.00047463	0.706187	6.25023	CGGCGTGCTGCCAGGCCCGGCCACGCTGACTTTGGCCAGCCTGACGCTGCTGGCCTTGATGGTGGCCGCGGTCAACCTCAAGCGCTGGAGGCTGAGATGAAACCCGACGCTCCGCGCCGCGCCATAAAGCGCCTGGCGTTATGGCTGCCGGTGATGGCCGTGGCGGCGCTGCTGCTGGCGCTGAACCTATGGGCATCGCGCCATCTGGGGCGCCTGGACCTGACCGCCCAACGCCTGTACAGCCTGGCTCCCGAAAGCATCGAGGTGGCGCGCCGTATCAACCAGCCCGTCGAGGTCACCTGGTTCTACGACCTGCGCAACAAAAGCATGGTCGACGCGCTGGAGCTGCTGCGC	354	tr|J4YVY4|J4YVY4_9BURK_ABC-2_type_transport_system_permease_protein_OS=Achromobacter_marplatensis_OX=470868_GN=DFP87_11113_PE=4_SV=1~~~tr|A0A6S7AI40|A0A6S7AI40_9BURK_Uncharacterized_protein_OS=Achromobacter_kerstersii_OX=1353890_GN=LMG3441_04449_PE=4_SV=1~~~tr|A0A1N7PRN9|A0A1N7PRN9_9BURK_ABC-2_type_transport_system_permease_protein_OS=Achromobacter_sp._MFA1_R4_OX=1881016_GN=SAMN05428937_1145_PE=4…
3	n14879	1	0	39	1	15	0	0	3.78127e-08	0.00047463	0.706187	6.25023	TCGAGGAACCGAGCAAGAAAAGCAGCTTTCTGACCAAATCGCGCGGCTCGTTCTGACCAAC	61
3	n14986	1	0	39	1	15	0	0	3.78127e-08	0.00047463	0.706187	6.25023	GGGTTCACCCATGCGGCCGATGCCGCAAAAGCCAATGCGCGGCGTCTTCGTCATTCCTGGCCTCCCTGGGCAGGAGCTTCCCCGAGCGACGCTTCGTAAGGCCAGTTCACGGCTCCGGAATG	122	tr|A0A848NI14|A0A848NI14_9BURK_DNA_mismatch_repair_endonuclease_MutL_OS=Achromobacter_ruhlandii_OX=72557_GN=mutL_PE=4_SV=1~~~tr|A0A246Q172|A0A246Q172_9BURK_ATP-dependent_RNA_helicase_DbpA_OS=Achromobacter_sp._HZ28_OX=2015171_GN=CEY04_25560_PE=3_SV=1~~~tr|A0A3Q9KKD7|A0A3Q9KKD7_9BURK_NAD(P)-dependent_oxidoreductase_OS=Achromobacter_spanius_OX=217203_GN=ELS24_14850_PE=4_SV=1~~~tr|A0A446C458|A0A446C4…
3	n15016	1	0	39	1	15	0	0	3.78127e-08	0.00047463	0.706187	6.25023	GGCGTTTCCGGACGTGCTCTTCAGCAGCACCGACACGGTGGAGTTCATGGGCGCCTACATTTCGCTGCAGTACATCGCCGTGTTCGTCATCAGTGTGATGATCGTCGGCCTGATGGAGCTGTTCCTGCGCCATTCCATCTGGGGTTACGGCGTGCGCGCGGTCGCGCACGATCGCGACCTGGCGTCGCTCATGGGCATACCGGTCTACCGCGTGGTGGTCTTCTCGTTTCTGGTGAGCGGCGTGCTGGCTGGCATCGCCGGCATCCTGGTGTCGCAGGTGTCGGGCACGGTGGATCCGAATTTCGGCCTGCATCTGCTGATCCTGGCTTTTGTCGCCGCGGTCATGGGCGGCATGGGCAGCGCGTTCGGCTCTTTGGTGGGCGGGCTGATCCTCGGCAT…	1296	tr|A0A246Q8V9|A0A246Q8V9_9BURK_ABC_transporter_OS=Achromobacter_sp._HZ28_OX=2015171_GN=CEY04_07915_PE=4_SV=1~~~tr|A0A4Q1HQH2|A0A4Q1HQH2_9BURK_ABC_transporter_OS=Achromobacter_aloeverae_OX=1750518_GN=C7R54_02495_PE=4_SV=1~~~tr|A0A446CK05|A0A446CK05_9BURK_Ribose_import_ATP-binding_protein_RbsA_OS=Achromobacter_veterisilvae_OX=2069367_GN=rbsA_3_PE=4_SV=1~~~tr|E3HMH3|E3HMH3_ACHXA_Inner-membrane_trans…
3	n15043	1	0	39	1	15	0	0	3.78127e-08	0.00047463	0.706187	6.25023	GAGGTGGCTCCCGGGGTCGCCGCCAGCCACTGGACGAATGCTCAGGGTCTTAATCAGTTGCTCAACAATTTCCTGTCCAATGCCATCCGGTTTACGGAACGCGGCGGGATCCGGGTACATCTGGACGGCGCTCCGGTGGAGGATGGCCGGCAATGGCTCACGCTGTCGGTCATCGATACCGGCAGCGGTATCGAGCCGCACATACAGCAGAATCTGTCGGCGTCCCGTTACGAAGCGGGGCTGAGCGCCTCGTCCGATGGCGCCGGGCTGGGCCTGCATTACTGCCAGCAGATGGTGCACCGCTTGGGCGGAACCATCCACATCTCCAGCATTGTCGGCGAGGGCACGCATGTCCATGTCCGCGTGCCGCTGCCGCTGGCGCCCGGCGAGCTGCGCGAC…	1077	tr|A0A0D6H865|A0A0D6H865_ALCXX_Histidine_kinase_OS=Alcaligenes_xylosoxydans_xylosoxydans_OX=85698_GN=luxQ_1_PE=4_SV=1~~~tr|A0A6S7CFI8|A0A6S7CFI8_9BURK_Histidine_kinase_OS=Achromobacter_dolens_OX=1287738_GN=rcsC_11_PE=4_SV=1~~~tr|A0A0Q8BR38|A0A0Q8BR38_9BURK_Chemotaxis_protein_OS=Achromobacter_sp._Root565_OX=1736564_GN=ASD71_11850_PE=4_SV=1~~~tr|A0A3C1Y040|A0A3C1Y040_9BURK_Chemotaxis_protein_OS=Ach…
3	n15070	1	0	39	1	15	0	0	3.78127e-08	0.00047463	0.706187	6.25023	GAAAAGCCCACCCTCGCGGGTGGGCTTGGCCTTTATGGCGAGTGCAGCCTGTTACGCCTGCACCGCTAGCTCCTTCCACACCGCCAGCGGCGCTTCCGCATGGTTCAAGGTGTAGAAATGC	121	tr|A0A6S6ZN12|A0A6S6ZN12_9BURK_Methylenetetrahydrofolate_reductase_OS=Achromobacter_pestifer_OX=1353889_GN=metF_PE=3_SV=1~~~tr|A0A7X9W465|A0A7X9W465_9BURK_Methylenetetrahydrofolate_reductase_OS=Achromobacter_sp._Bel_OX=2727415_GN=metF_PE=3_SV=1~~~tr|A0A2S8VJE1|A0A2S8VJE1_9BURK_Methylenetetrahydrofolate_reductase_OS=Achromobacter_sp._MYb9_OX=1827284_GN=metF_PE=3_SV=1~~~tr|A0A2S5GX64|A0A2S5GX64_9BU…
3	n15098	1	0	39	1	15	0	0	3.78127e-08	0.00047463	0.706187	6.25023	CGAAAAGCCCCACAGGTACATGACGGCGAAAGTGGCGATCAGGCATACCGGAATCGCCACGCTGGGGATGGCCGCCGCGCGTGCATTGCCCAGGAACGCCCACACCACC	109	tr|A0A6S7AS09|A0A6S7AS09_9BURK_Multidrug_resistance_protein_MdtC_OS=Achromobacter_deleyi_OX=1353891_GN=mdtC_2_PE=4_SV=1~~~tr|A0A0Q8WN86|A0A0Q8WN86_9BURK_Acriflavine_resistance_protein_B_OS=Achromobacter_sp._Root83_OX=1736602_GN=ASE30_20635_PE=4_SV=1~~~tr|A0A658AAB0|A0A658AAB0_ALCXX_Acriflavine_resistance_protein_B_(Fragment)_OS=Alcaligenes_xylosoxydans_xylosoxydans_OX=85698_GN=DAI43_18790_PE=4_SV…
3	n15240	1	0	39	1	15	0	0	3.78127e-08	0.00047463	0.706187	6.25023	GCCCAGCAGAGGCGAAAAGCCCGGCGCGGCGGCCATGGCCACCATGGTCAAGGCCAGGGTG	61
3	n15344	1	0	39	1	15	0	0	3.78127e-08	0.00047463	0.706187	6.25023	GGCACTGGGCACGTAGTGCGGCACCGGCGTGGCGGACAAACCGGCACGGGCGGACAGTTCGCGCAACATGGCCCAAATCTCGGGCGCTTCGTGCGGGTGCAGGGCCCGCGCGCGGTACAGGCGCAAGGTCAGCGCCGACGCGGCTGTCGGCTCCAGCAGCAGCGCGCCAGCAACGGCAAACAGCGCGGGCCAAAAGCCGCCTTCGCCGAACAACAGGCTCCCCGCAGCGGTCGCAATCCCGACCAGGGTCAGGACCAGCAACCCCGTCTGCAGGCGGTTGAGCCGGCGATGTTGCAACAACGCAGCACGCAGGTCACTGGGATGATGACGGTTCATGCCCAGATGTCTCGGCTGCGCGGTTGTCGCGATCGCGCAGCAGCCAGTAAGTGATACTAAGCG…	526	tr|D4XJV5|D4XJV5_9BURK_Peptidase,_M48_family_OS=Achromobacter_piechaudii_ATCC_43553_OX=742159_GN=HMPREF0004_5752_PE=3_SV=1~~~tr|A0A2I8DC86|A0A2I8DC86_9BURK_Zn-dependent_protease_OS=Achromobacter_sp._AONIH1_OX=1758194_GN=C2U31_00830_PE=3_SV=1~~~tr|A0A2M9H3N1|A0A2M9H3N1_9BURK_Protease_HtpX_OS=Achromobacter_ruhlandii_OX=72557_GN=htpX_2_PE=3_SV=1~~~tr|D4XJQ3|D4XJQ3_9BURK_Peptidase,_M48_family_OS=Achr…
3	n15417	1	0	39	1	15	0	0	3.78127e-08	0.00047463	0.706187	6.25023	CGTCGTCAGTTGGAGCCCCTTGCTCGTAAAAGCCGGATATCCGCTCAACCCCGCTTCCGGGGCCACGAGAATCGGATCGCCCTTTCTGTAT	91	tr|A0A446CTB8|A0A446CTB8_9BURK_Ferrichrome-iron_receptor_OS=Achromobacter_veterisilvae_OX=2069367_GN=fhuA_14_PE=3_SV=1~~~tr|A0A0M7DT24|A0A0M7DT24_9BURK_Ferric_hydroxamate_uptake_OS=Achromobacter_aegrifaciens_OX=1287736_GN=fhuA_3_PE=3_SV=1~~~tr|E3HKA7|E3HKA7_ACHXA_TonB-dependent_siderophore_receptor_family_protein_15_OS=Achromobacter_xylosoxidans_(strain_A8)_OX=762376_GN=AXYL_04749_PE=3_SV=1~~~tr|…
3	n15528	1	0	39	1	15	0	0	3.78127e-08	0.00047463	0.706187	6.25023	CCAGATGAAATCCATTCTGCAGTCCGAAAAGCTCCTGTTGCTGGCCTGCGCGCTGGCCGCC	61	tr|A0A6S7AMZ8|A0A6S7AMZ8_9BURK_Histidine_kinase_domain-containing_protein_OS=Achromobacter_kerstersii_OX=1353890_GN=LMG3441_04334_PE=4_SV=1~~~tr|A0A7U0I4J5|A0A7U0I4J5_ALCXX_DEAD/DEAH_box_helicase_OS=Alcaligenes_xylosoxydans_xylosoxydans_OX=85698_GN=I6I48_01460_PE=4_SV=1~~~tr|A0A5K4Y0Y1|A0A5K4Y0Y1_ALCXX_Helicase_OS=Alcaligenes_xylosoxydans_xylosoxydans_OX=85698_GN=AL520_09030_PE=4_SV=1~~~tr|A0A6S7…
3	n15556	1	0	39	1	15	0	0	3.78127e-08	0.00047463	0.706187	6.25023	GCGGCGTGAAAAGCTCGATGGCGCTTTGCAGGTCCAGGAAATTC	44	tr|A0A6S7FCK7|A0A6S7FCK7_9BURK_Uncharacterized_protein_OS=Achromobacter_insolitus_OX=217204_GN=LMG6000_02782_PE=4_SV=1~~~tr|A0A7D4DXI9|A0A7D4DXI9_9BURK_Uncharacterized_protein_OS=Achromobacter_pestifer_OX=1353889_GN=FOC84_13630_PE=4_SV=1~~~tr|E3HQI4|E3HQI4_ACHXA_Uncharacterized_protein_OS=Achromobacter_xylosoxidans_(strain_A8)_OX=762376_GN=AXYL_06325_PE=4_SV=1~~~tr|A0A6S7DQ11|A0A6S7DQ11_9BURK_Unc…
3	n15720	1	0	39	1	15	0	0	3.78127e-08	0.00047463	0.706187	6.25023	GCAGTTGATACTGATCCGGCGCTTCGAAGAAAAGCTGCTGAAGCTCAGCGTGGCCGGCATC	61	tr|A0A446C8E2|A0A446C8E2_9BURK_2-oxoisovalerate_dehydrogenase_subunit_beta_OS=Achromobacter_veterisilvae_OX=2069367_GN=bfmBAB_PE=4_SV=1~~~tr|E3HQT6|E3HQT6_ACHXA_Transketolase,_C-terminal_domain_protein_1_OS=Achromobacter_xylosoxidans_(strain_A8)_OX=762376_GN=AXYL_01406_PE=4_SV=1~~~tr|A0A658AJ11|A0A658AJ11_ALCXX_MFS_transporter_OS=Alcaligenes_xylosoxydans_xylosoxydans_OX=85698_GN=DAI43_07945_PE=4_…
3	n15772	1	0	39	1	15	0	0	3.78127e-08	0.00047463	0.706187	6.25023	GCGCACTGATCAGATAACAAACCATGGCCAAAAGCTGCGCGGGCCAGTGGGCACGCGTCAG	61	tr|E3HEE8|E3HEE8_ACHXA_Putative_membrane_protein_18_OS=Achromobacter_xylosoxidans_(strain_A8)_OX=762376_GN=AXYL_01860_PE=4_SV=1~~~tr|A0A658A7F4|A0A658A7F4_ALCXX_Uncharacterized_protein_OS=Alcaligenes_xylosoxydans_xylosoxydans_OX=85698_GN=DAI43_25645_PE=4_SV=1~~~tr|A0A0M7DEC3|A0A0M7DEC3_9BURK_Uncharacterized_protein_OS=Achromobacter_aegrifaciens_OX=1287736_GN=ERS370000_00726_PE=4_SV=1~~~tr|A0A424W…
3	n15806	1	0	39	1	15	0	0	3.78127e-08	0.00047463	0.706187	6.25023	TGAGCTGCACACCGTGCTGTATCTGCAGGAAAAGCTGTCCGGACGCATCGTGGGACAGGACGAA	64	tr|A0A6S7DVN8|A0A6S7DVN8_9BURK_Protein_ClpV1_OS=Achromobacter_anxifer_OX=1287737_GN=clpV1_2_PE=4_SV=1~~~tr|A0A0M7F2W9|A0A0M7F2W9_9BURK_Protein_disaggregation_chaperone_OS=Achromobacter_aegrifaciens_OX=1287736_GN=clpV1_1_PE=4_SV=1~~~tr|A0A854PVU0|A0A854PVU0_9BURK_ClpV1_family_T6SS_ATPase_OS=Achromobacter_sp._KAs_3-5_OX=1915388_GN=BMR85_019120_PE=4_SV=1~~~tr|A0A658A2P0|A0A658A2P0_ALCXX_Type_VI_secr…
3	n15833	1	0	39	1	15	0	0	3.78127e-08	0.00047463	0.706187	6.25023	GAATCAAAAGCTGGAAGGCGCCTACAAGCAGTTCAGCGACGTGGTCAGGCGTCAGGCGGCC	61	tr|A0A446D1B0|A0A446D1B0_9BURK_Methyl-accepting_chemotaxis_protein_II_OS=Achromobacter_veterisilvae_OX=2069367_GN=tar_2_PE=4_SV=1~~~tr|A0A2N8KND8|A0A2N8KND8_9BURK_Methyl-accepting_chemotaxis_protein_OS=Achromobacter_pulmonis_OX=1389932_GN=C1I89_00730_PE=4_SV=1~~~tr|A0A7Y4NI75|A0A7Y4NI75_9BURK_HAMP_domain-containing_protein_(Fragment)_OS=Achromobacter_deleyi_OX=1353891_GN=HLG70_00005_PE=4_SV=1~~~t…
3	n15975	1	0	39	1	15	0	0	3.78127e-08	0.00047463	0.706187	6.25023	CGTGCAGGATGCCGACCGCCTGGATGCGCTCGGACCGGTGGGACTGGCCCGCATGTTCCACGTCGGCGGGCAACTGGGGCGGGCGCTGGCGCACCCCACCGACCCCATGGGCGAGCATCGGCAACTGGACGACGGCATCTACACCCTGGATCACATCGAGCTGAAGCTCGCCAGCATCGCGCAAACCATGCAGACGGAAGGCGGCCGCATGCTTGCGGCCACGCGGCTGGACTGGATAAGGCGGTTCCGCGACGACTTCGTGGCGGATTGGACGGCCTGAAACGGCGCTATCTTCGATCGGCCGGTGTTCATGTTATATAATAAGAACCATTCTCATAAACACTGATGCCGGCCGAATCCAGGCCCGATGCGCGGTGGGGGGGCTTGCCGTGCCGGCCA…	4697	tr|A0A0M7LD41|A0A0M7LD41_9BURK_Ferric_hydroxamate_uptake_OS=Achromobacter_aegrifaciens_OX=1287736_GN=fhuA_9_PE=3_SV=1~~~tr|A0A658A9E3|A0A658A9E3_ALCXX_RNA_polymerase_subunit_sigma_OS=Alcaligenes_xylosoxydans_xylosoxydans_OX=85698_GN=DAI43_25555_PE=3_SV=1~~~tr|E3HMK2|E3HMK2_ACHXA_RNA_polymerase_sigma_factor_FecI_12_OS=Achromobacter_xylosoxidans_(strain_A8)_OX=762376_GN=AXYL_04921_PE=3_SV=1~~~tr|A0…
3	n16078	1	0	39	1	15	0	0	3.78127e-08	0.00047463	0.706187	6.25023	ACGTGCTCGCCGCAGTGAAAAGCGCCCTGGCCAACCCTGCTGGCCAGCCGACCACCGAACAGGCT	65	tr|A0A424WJF1|A0A424WJF1_ALCXX_Histidine_kinase_OS=Alcaligenes_xylosoxydans_xylosoxydans_OX=85698_GN=DY367_03010_PE=4_SV=1~~~tr|A0A0M7LH12|A0A0M7LH12_9BURK_Histidine_kinase_OS=Achromobacter_aegrifaciens_OX=1287736_GN=rcsC_PE=4_SV=1~~~tr|A0A7D4DZF4|A0A7D4DZF4_9BURK_Histidine_kinase_OS=Achromobacter_pestifer_OX=1353889_GN=FOC84_15230_PE=4_SV=1~~~tr|E3HM42|E3HM42_ACHXA_Bacterial_regulatory_helix-tur…
3	n16155	1	0	39	1	15	0	0	3.78127e-08	0.00047463	0.706187	6.25023	TCCAGATGGAGCGGTTTTTTCGACCCGAAAAGCGCTTGCCCTGCAAGTGTTATCAGGG	58
3	n16181	1	0	39	1	15	0	0	3.78127e-08	0.00047463	0.706187	6.25023	GCCGGCGGGCGGGAAAAGCGCGACGCGCGGTAAGAGAGGTAGAGGGCATGGTCCGTTTCAG	61	tr|A0A0L8EPT0|A0A0L8EPT0_9BURK_TonB-dependent_receptor_OS=Achromobacter_sp._DMS1_OX=1688405_GN=AD428_13465_PE=3_SV=1~~~tr|A0A0Q8BUB7|A0A0Q8BUB7_9BURK_Acetyltransferase_OS=Achromobacter_sp._Root565_OX=1736564_GN=ASD71_00175_PE=4_SV=1~~~tr|A0A0M7ESW9|A0A0M7ESW9_9BURK_Putative_ParB-like_nuclease_OS=Achromobacter_aegrifaciens_OX=1287736_GN=ERS370000_01376_PE=4_SV=1~~~tr|A0A2S0IC94|A0A2S0IC94_9BURK_GN…
3	n16240	1	0	39	1	15	0	0	3.78127e-08	0.00047463	0.706187	6.25023	AGCCAGGCTGTCCGGTCTTGTTGCGGCAAAAGCGCGCCGGGATCAGGCCTGGTTGGCC	58	tr|A0A3S9YVT0|A0A3S9YVT0_9BURK_Non-ribosomal_peptide_synthetase_OS=Achromobacter_spanius_OX=217203_GN=ELS24_14810_PE=4_SV=1~~~tr|A0A6S7DHX2|A0A6S7DHX2_9BURK_Beta-hexosaminidase_OS=Achromobacter_piechaudii_OX=72556_GN=nagZ_PE=3_SV=1~~~tr|D4XFV7|D4XFV7_9BURK_Beta-hexosaminidase_OS=Achromobacter_piechaudii_ATCC_43553_OX=742159_GN=nagZ_PE=3_SV=1~~~tr|A0A7X9ZBV0|A0A7X9ZBV0_9BURK_Beta-hexosaminidase_OS…
3	n16305	1	0	39	1	15	0	0	3.78127e-08	0.00047463	0.706187	6.25023	TCACCAAAAGCGCGGGATTGCATACGCGGGCTGGAGCTCGCCCTCAGAACGCCCAGCGCAC	61	tr|F7T349|F7T349_9BURK_Polysaccharide_deacetylase_family_protein_4_OS=Achromobacter_insuavis_AXX-A_OX=1003200_GN=AXXA_16821_PE=4_SV=1~~~tr|A0A120LHC2|A0A120LHC2_ALCXX_Polysaccharide_deacetylase_OS=Alcaligenes_xylosoxydans_xylosoxydans_OX=85698_GN=AL504_12585_PE=4_SV=1~~~tr|A0A0X8BWI0|A0A0X8BWI0_9PSED_Lysine_transporter_LysE_OS=Pseudomonas_monteilii_OX=76759_GN=APT63_14845_PE=4_SV=1
3	n16443	1	0	39	1	15	0	0	3.78127e-08	0.00047463	0.706187	6.25023	TGCTTGACGTAGTAGTTCACCTCGGCGAATTCGATGTCCTCGCCCAGGGCCGCCGCCGCGCCGCGCAGCAGCTTATTGGCGTTCCATTTGGAGTTGTCGAGGATGCCCAGCCGCAATCCGGCCAGGTCCTTCTTGCGCGCCGATACCGGCGCGTCTTCGAAGCGCAAAGCGCCGCGCGGGTCGTACACCGCGACTTTTTCCCCGTTGTTCATCAACATTTCCAATCTCCTGGTTGTCTGGTCCGGATGCCGCGTCAGATGGCGCAGGCGCCGCTGGTGCAGTCGCCGGCGTCGGCGCTCGTGCCTTCGATCGACCGCAACACCGGCGTGCTCATATGCCCCCAGCCCGGTATCAGCACGGAAAAGCGGCCGGCCTCGCCGCCCATCACGAACAGATGGA…	485	tr|A0A446CQD0|A0A446CQD0_9BURK_Putative_cation-transporting_ATPase_F_OS=Achromobacter_veterisilvae_OX=2069367_GN=ctpF_PE=4_SV=1~~~tr|A0A2S5GXN9|A0A2S5GXN9_9BURK_Zinc-binding_dehydrogenase_OS=Achromobacter_spanius_OX=217203_GN=C4E15_00715_PE=4_SV=1~~~tr|A0A6S7F0N6|A0A6S7F0N6_9BURK_Uncharacterized_protein_OS=Achromobacter_insolitus_OX=217204_GN=LMG6000_02502_PE=4_SV=1~~~tr|E3HP92|E3HP92_ACHXA_Uncha…
3	n16473	1	0	39	1	15	0	0	3.78127e-08	0.00047463	0.706187	6.25023	CCGCAGTAGGCCAAGGGCCTATGAAATGGGACAAAAGCGGCGCTATCGCCCGCAATCGACGAGCATCTGCCCCCCCTACTCCAGAGGCACGAAGAAAATCCCGCCATATCAGTACATTTACATCCGCTCCTGCCGTAAATCT	142	tr|A0A6S7CCJ8|A0A6S7CCJ8_9BURK_Argininosuccinate_lyase_OS=Achromobacter_pulmonis_OX=1389932_GN=argH_1_PE=4_SV=1~~~tr|A0A4Q1HN94|A0A4Q1HN94_9BURK_2-methylcitrate_dehydratase_OS=Achromobacter_aloeverae_OX=1750518_GN=C7R54_08930_PE=3_SV=1~~~tr|A0A246QBF4|A0A246QBF4_9BURK_2-methylcitrate_dehydratase_OS=Achromobacter_sp._HZ28_OX=2015171_GN=CEY04_05125_PE=3_SV=1~~~tr|A0A658A9F2|A0A658A9F2_ALCXX_Polypho…
3	n16540	1	0	39	1	15	0	0	3.78127e-08	0.00047463	0.706187	6.25023	CATACTGGAACAGGAAGGCATAGGAAAAGTAAACCTCGTGTGCCAGTCGCTGGGCGCATGG	61	tr|A0A658AE92|A0A658AE92_ALCXX_Alpha/beta_hydrolase_OS=Alcaligenes_xylosoxydans_xylosoxydans_OX=85698_GN=DAI43_11320_PE=4_SV=1~~~tr|A0A7D4I0K3|A0A7D4I0K3_9BURK_Alpha/beta_hydrolase_OS=Achromobacter_pestifer_OX=1353889_GN=FOC84_16455_PE=4_SV=1~~~tr|A0A6S7DXG8|A0A6S7DXG8_9BURK_AB_hydrolase_superfamily_protein_YdjP_OS=Achromobacter_anxifer_OX=1287737_GN=ydjP_PE=4_SV=1~~~tr|A0A424WJR6|A0A424WJR6_ALCX…
3	n16582	1	0	39	1	15	0	0	3.78127e-08	0.00047463	0.706187	6.25023	GACCGACGAGCCGGAAAAGTACGCCGGCGCCGCCGCGCTGCCACAGGGCGTGGCAGTGCACCACCGCAAGGCCCTGGACGACGTGCAGCGCGCCTTGCGCGACGTCGCAGGCACGACGGTGCTGATCTACGACCAGAC	138	tr|A0A095UMS8|A0A095UMS8_9BURK_Indolepyruvate_ferredoxin_oxidoreductase_OS=Achromobacter_sp._RTa_OX=1532557_GN=JL37_20880_PE=3_SV=1~~~tr|A0A6S7D894|A0A6S7D894_9BURK_Uncharacterized_protein_OS=Achromobacter_anxifer_OX=1287737_GN=LMG26858_02731_PE=3_SV=1~~~tr|A0A366G540|A0A366G540_9BURK_Putative_membrane-anchored_protein_OS=Achromobacter_marplatensis_OX=470868_GN=DFP87_103674_PE=4_SV=1~~~tr|J4Y7X3|…
3	n16681	1	0	39	1	15	0	0	3.78127e-08	0.00047463	0.706187	6.25023	CGATGTGGCGCCTGCGGAAAAGTCCGCTGAGCTTGCCGCTGAACTTGCCGCTGAACGGGCCGCGG	65
3	n16721	1	0	39	1	15	0	0	3.78127e-08	0.00047463	0.706187	6.25023	CCAGGGTCGCGACGGGCAAGGTCACGTAAAAGTCGATCGGACCGTCGGCCAATTGCGCCGC	61	tr|A0A0M7F0L5|A0A0M7F0L5_9BURK_Uncharacterized_protein_conserved_in_bacteria_OS=Achromobacter_aegrifaciens_OX=1287736_GN=ERS370000_01495_PE=4_SV=1~~~tr|A0A658AD87|A0A658AD87_ALCXX_Type_VI_secretion_system_baseplate_subunit_TssK_OS=Alcaligenes_xylosoxydans_xylosoxydans_OX=85698_GN=tssK_PE=4_SV=1~~~tr|A0A6S7D4L7|A0A6S7D4L7_9BURK_Uncharacterized_protein_OS=Achromobacter_anxifer_OX=1287737_GN=LMG2685…
3	n16821	1	0	39	1	15	0	0	3.78127e-08	0.00047463	0.706187	6.25023	CGAAAACTGTTCGTAATAAAGGCCAGCCATTTTCTTTCCTTCATGTAGAGAGCGCCGGGGTATTGGCCCGGAATTCGAGCGGCCGCTACCGGTAATCCCGATCCGCGTTCTTACTCTTGAACAAAAGTTTATATTCATGAACGAAGGCGGGCAATGGTTTTGCCTAGTCGTAAACCCGCAGGAGCCTGCGCAGCCGCAGAGGACGCAGGCGCGCGCCGCCAGCGCGGGTGACGCGGCGGAAAGCAGGAAGGAGAGGTAAAGGCGCGGCCGCCAGGCGCCTCTCGGGGCAGCCAGGCGGCCGGAGCGGCGG	310
3	n17019	1	0	39	1	15	0	0	3.78127e-08	0.00047463	0.706187	6.25023	CACCATCGTCAGCAAGGCTGCGCAGATGAACAGGATGACCGCCCAGGTCAGCCAGGGAAACAACCACATCTTGAACTTCAGTTCGGCTCCCTGAGCCTGCAGGCGCTGCCGCATGCGCAGTTGGCAGCATGCGATGGTCAGGTAGACGAACAGCGCTACGCAGCCCGTGGTTTGCATGAGGACGTCGTACAGGTCCATCGAGGACGTCGCCATCATGTAGACGGCAACGAATGCGAACACGCTGGATATGACCACGCCCACGTACGGCGCACCGGACGAAACGCCAGTAACGGCCATGATGCGATGCGCGTCGCCGCGACGGGCCAATGAATAGAGCATGCGCGACGAGACGTAAAGCGCCGAGTTGAAGCAGCTGCAGACCGAAGTCAGCACGATGGC…	1090	tr|A0A854Q3F3|A0A854Q3F3_9BURK_MBL_fold_hydrolase_OS=Achromobacter_sp._KAs_3-5_OX=1915388_GN=BMR85_001155_PE=4_SV=1~~~tr|A0A811GV78|A0A811GV78_9BURK_Uncharacterized_protein_OS=Achromobacter_mucicolens_OX=1389922_GN=LMG3415_02217_PE=4_SV=1~~~tr|A0A2S0I904|A0A2S0I904_9BURK_MBL_fold_hydrolase_OS=Achromobacter_spanius_OX=217203_GN=CLM73_15950_PE=4_SV=1~~~tr|A0A6S7C1N2|A0A6S7C1N2_9BURK_Lactamase_B_dom…
3	n17154	1	0	39	1	15	0	0	3.78127e-08	0.00047463	0.706187	6.25023	AGGAGACAGGCATGAGTTCATCTATGCCAGTACGATCAGGCCCAAAAGGATCGGCAGAACCGATTGAATTCCTGGTCG	78	tr|A0A658A9Q2|A0A658A9Q2_ALCXX_Acetylxylan_esterase_(Fragment)_OS=Alcaligenes_xylosoxydans_xylosoxydans_OX=85698_GN=DAI43_16535_PE=4_SV=1~~~tr|A0A7D4E0Y6|A0A7D4E0Y6_9BURK_Alpha/beta_hydrolase_OS=Achromobacter_pestifer_OX=1353889_GN=FOC84_29875_PE=4_SV=1~~~tr|A0A0M7I061|A0A0M7I061_9BURK_Uncharacterized_conserved_protein_OS=Achromobacter_aegrifaciens_OX=1287736_GN=ERS370000_02940_PE=4_SV=1~~~tr|A0A…
3	n17305	1	0	39	1	15	0	0	3.78127e-08	0.00047463	0.706187	6.25023	CCGCTACCTCAATGCCGCGCTGCAAAAGGCCAATCTTGCCGCCCGCTGGACCGCGTTCAAT	61
3	n17426	1	0	39	1	15	0	0	3.78127e-08	0.00047463	0.706187	6.25023	CAGGAAGGCGCAATACAGCTGCACCAGCGTGGGCGTGTTGCGCGTGACTTCCACAAAAGCCTGCAATGGCCTTGCCAGCCAGCCGCGGCCGCTGGTCAGGCCCGCCGCGATCAGGACGCCGAACGCCAGGCTCACTGGTATGGTCCACGCGCATAGTTGCAGCGTGACCAGCAGCCCGCGGCCGAACGCGGACAGTTCACCCGCGTCCAACACGAAGCTGTAGTTCAGGCCTAGCGGCTTGAAAAGGCCGACCCAGGCTTGCAGTGCCGATTCGAACATGCGCCGATCCGCCTCAACTTCCCTGCTTGTACTTGGCATGCAGTTCCTGCAATAGCGGCTGCGGCGGTGCGATGCCCAGGCGAGTTTCCGTGGCGATCAGCCAGCCCGTGCGATGCCAGT…	401	tr|A0A6S7EQT0|A0A6S7EQT0_9BURK_PBPb_domain-containing_protein_OS=Achromobacter_ruhlandii_OX=72557_GN=LMG3328_05485_PE=4_SV=1~~~tr|A0A6S7A6R8|A0A6S7A6R8_9BURK_Uncharacterized_protein_OS=Achromobacter_kerstersii_OX=1353890_GN=LMG3441_00361_PE=3_SV=1~~~tr|A0A7X9ZBW5|A0A7X9ZBW5_9BURK_ABC_transporter_permease_subunit_OS=Achromobacter_sp._Bel_OX=2727415_GN=HG262_06735_PE=3_SV=1~~~tr|A0A3S4NFS0|A0A3S4NF…
3	n17641	1	0	39	1	15	0	0	3.78127e-08	0.00047463	0.706187	6.25023	CATCCGCCACGCCGAAAAGGCGCTGGAAGCTGGCGTGGACGGCCTGATCCTGGTGTGCGCC	61	tr|A0A0D6G2K5|A0A0D6G2K5_ALCXX_Nitronate_monooxygenase_OS=Alcaligenes_xylosoxydans_xylosoxydans_OX=85698_GN=ERS451415_00893_PE=4_SV=1~~~tr|J4J703|J4J703_9BURK_2-nitropropane_dioxygenase_OS=Achromobacter_marplatensis_OX=470868_GN=QWC_19465_PE=4_SV=1~~~tr|E3HQ38|E3HQ38_ACHXA_2-nitropropane_dioxygenase_family_protein_5_OS=Achromobacter_xylosoxidans_(strain_A8)_OX=762376_GN=AXYL_03876_PE=4_SV=1~~~tr|…
3	n17709	1	0	39	1	15	0	0	3.78127e-08	0.00047463	0.706187	6.25023	TTGGCCGCGCAAAAGGCGTTGGGGCCTGCGATCGCGAGATTCGAAGATGCAGCCTACCGCG	61	tr|A0A1N7P3T1|A0A1N7P3T1_9BURK_Thiol:disulfide_interchange_protein_DsbA_OS=Achromobacter_sp._MFA1_R4_OX=1881016_GN=SAMN05428937_0442_PE=4_SV=1
3	n17764	1	0	39	1	15	0	0	3.78127e-08	0.00047463	0.706187	6.25023	GCTGTCGGCCTCGCTGGGCGCGCAAAAGGTATTTCCGTCGCTGCTGGTGCATCTGATCGCC	61	tr|A0A2S8VE47|A0A2S8VE47_9BURK_Acyltransferase_OS=Achromobacter_sp._MYb9_OX=1827284_GN=CQ050_11640_PE=4_SV=1~~~tr|A0A854Q406|A0A854Q406_9BURK_Type_II_secretion_system_protein_GspF_OS=Achromobacter_sp._KAs_3-5_OX=1915388_GN=BMR85_009785_PE=4_SV=1~~~tr|A0A176XY86|A0A176XY86_ALCXX_Type_II_secretion_system_protein_GspF_OS=Alcaligenes_xylosoxydans_xylosoxydans_OX=85698_GN=A7J67_09680_PE=3_SV=1~~~tr|A0…
3	n17886	1	0	39	1	15	0	0	3.78127e-08	0.00047463	0.706187	6.25023	AATGTCGTAGCCCGGCGTGCGCAGGTACTCACGGTCGAAAAGGTTGCTGATCGAAAGCGCGGCGTCCCATTGCTTGT	77	tr|A0A446CYN5|A0A446CYN5_9BURK_Fe(3+)-pyochelin_receptor_OS=Achromobacter_veterisilvae_OX=2069367_GN=fptA_10_PE=3_SV=1~~~tr|A0A366G3T3|A0A366G3T3_9BURK_Iron_complex_outermembrane_receptor_protein/outer_membrane_receptor_for_ferric_coprogen_and_ferric-rhodotorulic_acid_OS=Achromobacter_marplatensis_OX=470868_GN=DFP87_103706_PE=3_SV=1~~~tr|A0A446CF74|A0A446CF74_9BURK_Fe(3+)-pyochelin_receptor_OS=Ac…
3	n17928	1	0	39	1	15	0	0	3.78127e-08	0.00047463	0.706187	6.25023	CGCGCCCGGCCAGACGCTGGCCACGCGCGCAGAGGCCGAGGCGGCGCTCAAGAAAATGGGCGCGCAAAAGGTGCTGCGGGACCGCGGACGCCCGCCCCGGAGCTGGATTGAAAAGTGGGATGCGCGCATTGCGCGCGGC	139	tr|A0A0L8EUA2|A0A0L8EUA2_9BURK_Type_I_restriction_enzyme_R_Protein_OS=Achromobacter_sp._DMS1_OX=1688405_GN=AD428_04495_PE=3_SV=1~~~tr|A0A0M7GTU8|A0A0M7GTU8_9BURK_Uncharacterized_protein_OS=Achromobacter_aegrifaciens_OX=1287736_GN=ERS370000_02372_PE=4_SV=1~~~tr|A0A658A371|A0A658A371_ALCXX_Uncharacterized_protein_OS=Alcaligenes_xylosoxydans_xylosoxydans_OX=85698_GN=DAI43_37465_PE=4_SV=1~~~tr|A0A7D4…
3	n18093	1	0	39	1	15	0	0	3.78127e-08	0.00047463	0.706187	6.25023	GGAAGTCGCCGCCTCCGACAAGCCGGAAGCCGTAAGCCAGGCCCTGCGCGCGAAAAAGTACGACCAGGGTTGGGCAGGCGTGATGTCCGGCGGCGGCGTGCATTTCGACGCCAATGGCCTGAACACCATGGCGCAGCCCATCATGGTCCAGTGGCAAAAGGGCGAACTGGTCTCGGTCTGGCCGCAGGCATTGGCCAAGGGCCGCGTCATCGCGGCTGCCTGAGTCCGCGCGGAGAACAGTCATGCAATTCCTCCAGGCGCTGGTGGACGGCATTCTGCTGGGC	284	tr|A0A6S6ZFK0|A0A6S6ZFK0_9BURK_DUF4347_domain-containing_protein_OS=Achromobacter_kerstersii_OX=1353890_GN=LMG3441_01344_PE=4_SV=1~~~tr|A0A3R9MMI1|A0A3R9MMI1_ACHDE_ABC_transporter_substrate-binding_protein_OS=Achromobacter_denitrificans_OX=32002_GN=FOC81_25645_PE=3_SV=1~~~tr|A0A5N7ZLX8|A0A5N7ZLX8_9BURK_Peripla_BP_6_domain-containing_protein_OS=Achromobacter_sp._OX=134375_GN=E2603_12830_PE=3_SV=1~…
3	n18188	1	0	39	1	15	0	0	3.78127e-08	0.00047463	0.706187	6.25023	AGTCAGGATCAAGTGCAGCTGTGGGAACGAAAAGGGGAAATAGGTGATGTATTCGCCGCGC	61	tr|A0A7X9ZFW5|A0A7X9ZFW5_9BURK_Methyltransferase_domain-containing_protein_OS=Achromobacter_sp._Bel_OX=2727415_GN=HG262_21370_PE=4_SV=1~~~tr|A0A3S4RMT1|A0A3S4RMT1_9BURK_Bifunctional_3-demethylubiquinone-9_3-methyltransferase/_2-octaprenyl-6-hydroxy_phenol_methylase_OS=Achromobacter_spanius_OX=217203_GN=NCTC13519_00198_PE=4_SV=1~~~tr|E3HS90|E3HS90_ACHXA_Methyltransferase_domain_protein_5_OS=Achrom…
3	n18249	1	0	39	1	15	0	0	3.78127e-08	0.00047463	0.706187	6.25023	CCTGGTCGTCGGCGGCGGCCGTCCTTGAAAAGGGGGGAGCGCTATGGACACGCCACGG	58	tr|F7T9T6|F7T9T6_9BURK_Heme_utilization/adhesion_protein_OS=Achromobacter_insuavis_AXX-A_OX=1003200_GN=AXXA_28670_PE=4_SV=1
3	n18283	1	0	39	1	15	0	0	3.78127e-08	0.00047463	0.706187	6.25023	GAACGAAACAAACTTGCCGCCGTTCTCACGAAGCCGCGACGCAATACGATCGCCGACGGCA	61	tr|A0A2I8DIX7|A0A2I8DIX7_9BURK_DNA_replication_protein_DnaC_OS=Achromobacter_sp._AONIH1_OX=1758194_GN=C2U31_15165_PE=4_SV=1~~~tr|A0A1N7P3V6|A0A1N7P3V6_9BURK_Phage_DNA_replication_protein_(Predicted_replicative_helicase_loader)_OS=Achromobacter_sp._MFA1_R4_OX=1881016_GN=SAMN05428937_0446_PE=4_SV=1~~~tr|A0A0M7MRF3|A0A0M7MRF3_9BURK_DNA_replication_protein_dnaC_OS=Achromobacter_sp._OX=134375_GN=dnaC_…
3	n18318	1	0	39	1	15	0	0	3.78127e-08	0.00047463	0.706187	6.25023	GTTCGAGCCCCATCAGCCACCCCAAAGAATCGTTTAGAAAACAGCCGCTTAGAGCGGCTGTTTTTTTGCGCGCTCAGAATTAATTAAAAAATAGCGACGTTAGAACGATGTCATTCGGTAGCTGAAGCGATTTTGACCGACCGTGTGTCGTAGTTCTTATGTGTGTTGTGGCGGGGGCGCGTGAGCTGACTGACATCCTCTGAGTGCCCCCGGAATTTTCCAGTTATCAACTGTCCAACTTCAAGGGGGGCACAGGTCAGTAGATCCAGATTACCGGGGCCTTCAATAAACTAACTGCTTGCATCTATAGAACTTGCGTATCTCTACCTCTGGGGTCGAATTAGACAACATCGTAAGGACTGCTAGGTCGTCAAGATAGAAGGCTCTGCCCTTGGAAGT…	1961	tr|A0A095W5R7|A0A095W5R7_9BURK_ABC_transporter_substrate-binding_protein_OS=Achromobacter_sp._RTa_OX=1532557_GN=JL37_12885_PE=3_SV=1~~~tr|A0A446C2Z6|A0A446C2Z6_9BURK_Uncharacterized_protein_OS=Achromobacter_agilis_OX=1353888_GN=AGI3411_00334_PE=3_SV=1~~~tr|A0A6N0JW38|A0A6N0JW38_ACHDE_Tripartite_tricarboxylate_transporter_substrate_binding_protein_OS=Achromobacter_denitrificans_OX=32002_GN=FOC81_2…
3	n18361	1	0	39	1	15	0	0	3.78127e-08	0.00047463	0.706187	6.25023	CTTGATCTTGAGCGGAAACAACAGCTGGACCGGAGGCACTGCGCTCAGCGCCGGCACCGTG	61	tr|A0A2I8DBV6|A0A2I8DBV6_9BURK_Autotransporter_domain-containing_protein_OS=Achromobacter_sp._AONIH1_OX=1758194_GN=C2U31_00035_PE=4_SV=1~~~tr|E3HYE2|E3HYE2_ACHXA_Outer_membrane_autotransporter_barrel_domain_protein_10_OS=Achromobacter_xylosoxidans_(strain_A8)_OX=762376_GN=AXYL_06814_PE=4_SV=1~~~tr|A0A246Q9K1|A0A246Q9K1_9BURK_Autotransporter_domain-containing_protein_OS=Achromobacter_sp._HZ28_OX=2…
3	n18366	1	0	39	1	15	0	0	3.78127e-08	0.00047463	0.706187	6.25023	GCGGACAAACAACAGGTAGCCCAGGCGGTCCTCCAACTGCCGGATCTGCTGGCTCACCGCG	61	tr|A0A6S7A8E0|A0A6S7A8E0_9BURK_HTH-type_transcriptional_regulator_PgrR_OS=Achromobacter_kerstersii_OX=1353890_GN=pgrR_4_PE=3_SV=1~~~tr|A0A424W9G8|A0A424W9G8_ALCXX_LysR_family_transcriptional_regulator_OS=Alcaligenes_xylosoxydans_xylosoxydans_OX=85698_GN=DY367_20450_PE=3_SV=1~~~tr|A0A7D4DZ67|A0A7D4DZ67_9BURK_LysR_family_transcriptional_regulator_OS=Achromobacter_pestifer_OX=1353889_GN=FOC84_10285_…
3	n18377	1	0	39	1	15	0	0	3.78127e-08	0.00047463	0.706187	6.25023	TTCGGGCAACAGGAAACAACCCATCAGGAAATTGACGCCGTTCAGGATTGCGGCTGCCAGG	61	tr|A0A6S7F515|A0A6S7F515_9BURK_Tetracycline_resistance_protein,_class_C_OS=Achromobacter_insolitus_OX=217204_GN=tetA_PE=3_SV=1~~~tr|E3HLA0|E3HLA0_ACHXA_Tetracycline_resistance_protein,_class_A_OS=Achromobacter_xylosoxidans_(strain_A8)_OX=762376_GN=AXYL_03627_PE=3_SV=1~~~tr|A0A0M7K4R4|A0A0M7K4R4_9BURK_Tetracycline_resistance_protein,_class_C_OS=Achromobacter_aegrifaciens_OX=1287736_GN=tetA_PE=3_SV…
3	n18387	1	0	39	1	15	0	0	3.78127e-08	0.00047463	0.706187	6.25023	TGCACTGCCGATGGCGAAAAAAAACAGAAAGACAACGGCCAGTACTCGTCGATATACAAACAACCTCATTCCTCCGGGGCAATAGTCG	88	tr|A0A7X9ZF60|A0A7X9ZF60_9BURK_DUF1800_domain-containing_protein_OS=Achromobacter_sp._Bel_OX=2727415_GN=HG262_26955_PE=4_SV=1~~~tr|A0A8B5UXL0|A0A8B5UXL0_9BURK_Uncharacterized_protein_(DUF1800_family)_OS=Achromobacter_sp._SLBN-14_OX=2768442_GN=FBY20_3540_PE=4_SV=1~~~tr|A0A3C1XUL9|A0A3C1XUL9_9BURK_DUF1800_domain-containing_protein_(Fragment)_OS=Achromobacter_sp._OX=134375_GN=DCR74_04095_PE=4_SV=1~~…
3	n18405	1	0	39	1	15	0	0	3.78127e-08	0.00047463	0.706187	6.25023	CGCCATGCTGGAACGCGGCGCGGCAGGCAAACAACTATGGGTGCGCATCAACGCGCTGGAGGGC	64	tr|A0A658A767|A0A658A767_ALCXX_CoA_ester_lyase_(Fragment)_OS=Alcaligenes_xylosoxydans_xylosoxydans_OX=85698_GN=DAI43_26950_PE=4_SV=1~~~tr|A0A6S7F712|A0A6S7F712_9BURK_(3S)-malyl-CoA_thioesterase_OS=Achromobacter_insolitus_OX=217204_GN=mcl2_3_PE=4_SV=1~~~tr|A0A0M7KXT1|A0A0M7KXT1_9BURK_(3S)-malyl-CoA_thioesterase_OS=Achromobacter_aegrifaciens_OX=1287736_GN=mcl2_2_PE=4_SV=1~~~tr|A0A6S7EIG8|A0A6S7EIG8…
3	n18435	1	0	39	1	15	0	0	3.78127e-08	0.00047463	0.706187	6.25023	AAACAACGAAGGCTGGCTGCCGACCGACCACGAGACGCTGCAGGTCTACGGGCTGCAGAAT	61	tr|A0A0Q8X765|A0A0Q8X765_9BURK_Diguanylate_cyclase_OS=Achromobacter_sp._Root83_OX=1736602_GN=ASE30_08645_PE=4_SV=1~~~tr|A0A6S7FAQ6|A0A6S7FAQ6_9BURK_Sulfide-quinone_reductase_OS=Achromobacter_insolitus_OX=217204_GN=sqr_PE=4_SV=1~~~tr|A0A2I8DPC1|A0A2I8DPC1_9BURK_Pyridine_nucleotide-disulfide_oxidoreductase_OS=Achromobacter_sp._AONIH1_OX=1758194_GN=C2U31_24735_PE=4_SV=1~~~tr|A0A7D4HVZ1|A0A7D4HVZ1_9B…
3	n18443	1	0	39	1	15	0	0	3.78127e-08	0.00047463	0.706187	6.25023	CACCATCGTGGCGCTCAGGCTAGAAATCGTGTCCTTGGATACCTGACCGGTGGCAACCAGAGCCTCCACCGCTTGACGCGCCTTACCTAGGCCACCGCCTGAAACGCCCGCCACTGCCGCAGACATCTCGCGGACATTCCCGGCCGTAACGCCCGCGTAGTTGCCGGTAAGCCGTATGGTCCGGTTTAGCCGCTCAGTCTCCTGACTTCCCTGATACGCCGCGACGCCAAAGGCCACGGCGGCACCTGCAAGCAACGTCCACGGGTTGACCATGCCCATCAGAGTGGAGCCAAGCGCACGCGCAGCGGGAGCGATCCCCCCGAACATATCTTTCAGCTGGCCGCCCTGCTGCAGCATCACTGTCATGGGCTGCTGACCGCTTTGCAGCGAAACAACGAT…	577	tr|J4Y1C4|J4Y1C4_9BURK_Tape_meas_lam_C_domain-containing_protein_OS=Achromobacter_marplatensis_OX=470868_GN=QWC_28138_PE=4_SV=1~~~tr|A0A2S0IDS7|A0A2S0IDS7_9BURK_Phage_tail_tape_measure_protein_OS=Achromobacter_spanius_OX=217203_GN=CLM73_25355_PE=4_SV=1~~~tr|A0A2N8KEF7|A0A2N8KEF7_9BURK_Phage_tail_tape_measure_protein_OS=Achromobacter_pulmonis_OX=1389932_GN=C1I89_23825_PE=4_SV=1~~~tr|A0A8B5V3C8|A0A…
3	n18546	1	0	39	1	15	0	0	3.78127e-08	0.00047463	0.706187	6.25023	CGCGCGCTCAGCCTGATGTCGGTTTATGCGCCGGGGGACAAGGCCCTGTCGCTGGGCGAACTGGCCGAGCGCACGCGCCTGTACAAGAGCACGGTCCTGCGGCTGTTGGCGTCGCTGGAACATGCCGGGTGGATCCAACGCCTGGACGACGGCCGTTATGCCTTGGGCGGGGAGATCGCGCGCCTGCACGGCATCTACGCCTCTTCGTTTTCGCTGGAACACGTAGTCCTGCCCGTGCTGCGCGACCTGGTCGCGGCGACAGGCGAAAGCGCGGCCTACCACGTGCGCCAGGGCGACGCGCGCCTGTGTCTGTACCGCGTGGATTCACCGCACCCGGTGCGCGACCACATCCGCGCAGGCGATCTGCTGCCGCTGGATCGCGGCAGTGGCGGACGCGTA…	818	tr|E3HS35|E3HS35_ACHXA_Bacterial_transcriptional_regulator_family_protein_9_OS=Achromobacter_xylosoxidans_(strain_A8)_OX=762376_GN=AXYL_01489_PE=4_SV=1~~~tr|A0A6S7F8H7|A0A6S7F8H7_9BURK_Pca_regulon_regulatory_protein_OS=Achromobacter_insolitus_OX=217204_GN=pcaR_3_PE=4_SV=1~~~tr|A0A6S7ED65|A0A6S7ED65_9BURK_Pca_regulon_regulatory_protein_OS=Achromobacter_anxifer_OX=1287737_GN=pcaR_5_PE=4_SV=1~~~tr|A…
3	n18646	1	0	39	1	15	0	0	3.78127e-08	0.00047463	0.706187	6.25023	CCGCGTCAATCGCACCAAACGTAAACAAGTCAAAGGCTGCGACTATTTCAAGAATGCGGAC	61	tr|A0A1N7P3R5|A0A1N7P3R5_9BURK_TraM_recognition_site_of_TraD_and_TraG_OS=Achromobacter_sp._MFA1_R4_OX=1881016_GN=SAMN05428937_0439_PE=4_SV=1
3	n18706	1	0	39	1	15	0	0	3.78127e-08	0.00047463	0.706187	6.25023	CAGCGCCTGCGCCGCGAACGCGCACACGGCAGTGGCTGCGGACAGCGCAAACAAGGGCCGGCGCAGCAGGTCCACCGCCAGGATGGGC	88	tr|E3HRY8|E3HRY8_ACHXA_Major_facilitator_superfamily_protein_7_OS=Achromobacter_xylosoxidans_(strain_A8)_OX=762376_GN=AXYL_00289_PE=4_SV=1~~~tr|A0A424WFV2|A0A424WFV2_ALCXX_MFS_transporter_OS=Alcaligenes_xylosoxydans_xylosoxydans_OX=85698_GN=DY367_09160_PE=4_SV=1~~~tr|A0A7D4HZ30|A0A7D4HZ30_9BURK_MFS_transporter_OS=Achromobacter_pestifer_OX=1353889_GN=FOC84_11415_PE=4_SV=1~~~tr|A0A6S7F9X8|A0A6S7F9X…
3	n18749	1	0	39	1	15	0	0	3.78127e-08	0.00047463	0.706187	6.25023	CATTGCTCGACAAACACACTAAAGATTCAGCGCAACTTCAAATCGTCCTTGATCGCGACAAGAT	64	tr|A0A2I8DBV2|A0A2I8DBV2_9BURK_Uncharacterized_protein_OS=Achromobacter_sp._AONIH1_OX=1758194_GN=C2U31_00850_PE=4_SV=1~~~tr|A0A2M9H3J2|A0A2M9H3J2_9BURK_Uncharacterized_protein_OS=Achromobacter_ruhlandii_OX=72557_GN=LMG3328_04295_PE=4_SV=1
3	n18801	1	0	39	1	15	0	0	3.78127e-08	0.00047463	0.706187	6.25023	CTGGGGCGGGCCCCGCAAGACACGCCACCAAACACAGATGTCGGCAAGAACCAGAAGAACGCCAATC	67	tr|A0A854PUU3|A0A854PUU3_9BURK_Glycosyl_transferase_OS=Achromobacter_sp._KAs_3-5_OX=1915388_GN=BMR85_014490_PE=4_SV=1~~~tr|A0A1N7QBU0|A0A1N7QBU0_9BURK_Histidine_kinase_OS=Achromobacter_sp._MFA1_R4_OX=1881016_GN=SAMN05428937_1948_PE=4_SV=1
3	n18827	1	0	39	1	15	0	0	3.78127e-08	0.00047463	0.706187	6.25023	CTGTTCGCGCCGCATGAGCCAGATGAAGAAACACAGGCCGCCCAGGACGCCCGAGACGATC	61	tr|A0A6S6Z550|A0A6S6Z550_9BURK_HATPase_c_domain-containing_protein_OS=Achromobacter_pestifer_OX=1353889_GN=LMG3431_03048_PE=4_SV=1~~~tr|A0A0M7LI24|A0A0M7LI24_9BURK_Sensory_histidine_kinase_UhpB_OS=Achromobacter_aegrifaciens_OX=1287736_GN=ERS370000_05063_PE=4_SV=1~~~tr|A0A658A198|A0A658A198_ALCXX_Histidine_kinase_OS=Alcaligenes_xylosoxydans_xylosoxydans_OX=85698_GN=DAI43_37795_PE=4_SV=1~~~tr|A0A42…
3	n18861	1	0	39	1	15	0	0	3.78127e-08	0.00047463	0.706187	6.25023	GCCACGGCCATCTCGCCCAGCATGCGCATGACTAGAAACACCAGGATCCCGCCGCCCAGATAAGCCAGGATCGCCGCGGGTCCGGCCAGCGCGATCTGCTTGCCGGACCCCACAAACAAGGCCGCGCCGATGACCCCGGCAATGGAAATCATCGTCATGTGGCGCGATTGCAGCCCACCCTTGAGTCCCTCACCCTTAGACATGCTTTCTCCTTTGACCGCGCCCCCGGTATGGAACGCGCTTGTTTTGTTTTTTTCCGCACAGGCCTGATGCAAGGCGCGCCTGACCCTAATCTTCAAGTCCCGCGGGCGCGAACCCGGCCAGGAGCGCGTCCAGCCAGCGCGGCGCAAGATCCCGCGCTTCGCGCGCTTCCTTTCTGCGTACGGCGTTGCGGACCAG…	2784	tr|A0A0L8ESN8|A0A0L8ESN8_9BURK_HTH_cro/C1-type_domain-containing_protein_OS=Achromobacter_sp._DMS1_OX=1688405_GN=AD428_01145_PE=4_SV=1~~~tr|A0A2N8KK55|A0A2N8KK55_9BURK_Transcriptional_regulator_OS=Achromobacter_pulmonis_OX=1389932_GN=C1I89_06150_PE=4_SV=1~~~tr|A0A6S7E221|A0A6S7E221_9BURK_HTH-type_transcriptional_regulator_PuuR_OS=Achromobacter_piechaudii_OX=72556_GN=puuR_PE=4_SV=1~~~tr|D4XGT7|D4X…
3	n18951	1	0	39	1	15	0	0	3.78127e-08	0.00047463	0.706187	6.25023	GCCTGGTAAACACCTTGACCGTCGCCGCCGTGGCAATCCCGCTGGCGACGGCGCTGGGCCT	61	tr|F7T8G3|F7T8G3_9BURK_Putative_amino_acid_ABC_transporter_permease_protein_OS=Achromobacter_insuavis_AXX-A_OX=1003200_GN=AXXA_26285_PE=3_SV=1~~~tr|A0A3C1XZC0|A0A3C1XZC0_9BURK_Amino_acid_ABC_transporter_permease_(Fragment)_OS=Achromobacter_sp._OX=134375_GN=DCR74_09610_PE=4_SV=1~~~tr|A0A811GVM2|A0A811GVM2_9BURK_Uncharacterized_protein_OS=Achromobacter_mucicolens_OX=1389922_GN=LMG3415_02314_PE=4_SV…
3	n18971	1	0	39	1	15	0	0	3.78127e-08	0.00047463	0.706187	6.25023	GATGTAGTTCAGGATCATTTCTTCCGACACTGGCGCGAACTTGAACAGCCTGGCGTCGCGCCACAAGCGCTCCACATGGAATTCACGCGCATAGCCCATGCCGCCCATCGTCTGCATGCTGCGTTCGATGGCATGGCTGGCAGCCTGGGAGCCTATCAGCTTGGCAATGTTGGCCTCGGTGCCATAGGGCAAGCCCTGGTCACACAGCGATGCCGCGTTCAGGTTCATGAGCCGCGCGCACTGCAGTTCCGCATGCGATTGCGCCAGGGGGAATTGCAGACCCTGGTATGCACTGATGGGCTTGCCGCCAAACACCTTGCGGTCGTTCGCGTACTGCACCGCCAGGCGCTCCGCCAACCTGCCCGCGCCGACCAGGCTGGCAGTCGTCACGATGCGCTC…	451	tr|A0A0M7LUV8|A0A0M7LUV8_9BURK_Acyl-CoA_dehydrogenase,_short-chain_specific_OS=Achromobacter_aegrifaciens_OX=1287736_GN=ERS370000_05253_PE=3_SV=1~~~tr|A0A6S7CF58|A0A6S7CF58_9BURK_Acyl-CoA_dehydrogenase_OS=Achromobacter_anxifer_OX=1287737_GN=acdA_2_PE=3_SV=1~~~tr|A0A658ADY4|A0A658ADY4_ALCXX_Acyl-CoA_dehydrogenase_OS=Alcaligenes_xylosoxydans_xylosoxydans_OX=85698_GN=DAI43_10735_PE=3_SV=1~~~tr|A0A0M…
3	n19063	1	0	39	1	15	0	0	3.78127e-08	0.00047463	0.706187	6.25023	TGGCGTTCCCGTTATTTTCCCCTCAGGTATAAATCTCTGATGCGTCAGCTCTCCTTTCGCATTGACTATCCACTCAAACACTCCTGACTTTCCATCCACAGCCCCTTCCATCTGGGTAAGGTTATACGATTTACCATCCCCACCTCGAAGAGTGAAAAATCTCCCCTTTTCTGGGATTTGATCAACAACGTAGCTGGGAGCCCGATGGAGAGAGTCGTCTTTAAGCGCACTCCCGACAGGCTGAGCACTTCTTATTTCTTGAGCAGCGTACGCTGCACGCTGCCTTTCGAAGAGAGCGATATTCGCTGCGGAGTCCGCCCCCCTAGCACCGGCGCCTCCTACCTTCCCTACATCAAGAGCCTTCCCCCCTTCCGCAAACACGCGAATCGCCTGGCCGCC…	1357	tr|A0A0M9IIT3|A0A0M9IIT3_ALCXX_Filamentous_hemagglutinin_OS=Alcaligenes_xylosoxydans_xylosoxydans_OX=85698_GN=fhaB_1_PE=4_SV=1~~~tr|A0A854PTL5|A0A854PTL5_9BURK_Filamentous_hemagglutinin_OS=Achromobacter_sp._KAs_3-5_OX=1915388_GN=BMR85_028550_PE=4_SV=1~~~tr|A0A6S6YJZ9|A0A6S6YJZ9_9BURK_Haemagg_act_domain-containing_protein_OS=Achromobacter_pestifer_OX=1353889_GN=LMG3431_00536_PE=4_SV=1~~~tr|A0A3Q9K…
3	n19243	1	0	39	1	15	0	0	3.78127e-08	0.00047463	0.706187	6.25023	GCGGCAGGGTCCGAAACACGCCCGGCGCGGAAATTTCAGCGATACTACGGCGGCCGGCCGG	61
3	n19255	1	0	39	1	15	0	0	3.78127e-08	0.00047463	0.706187	6.25023	GCCCAGGCCCTTGGCCAGCTCGCGCGCCAGCTCCGGGTTCCAGCCCACCAGCTGCTGCGTCGCGGGGTCCAGCGAACCAAACACGCCGCCATTGGCCAGCACGCCTATG	109	tr|A0A6S7EQT0|A0A6S7EQT0_9BURK_PBPb_domain-containing_protein_OS=Achromobacter_ruhlandii_OX=72557_GN=LMG3328_05485_PE=4_SV=1~~~tr|A0A2S8V7Y6|A0A2S8V7Y6_9BURK_Zinc-binding_dehydrogenase_OS=Achromobacter_sp._MYb9_OX=1827284_GN=CQ050_20015_PE=3_SV=1~~~tr|A0A366GBD2|A0A366GBD2_9BURK_2-desacetyl-2-hydroxyethyl_bacteriochlorophyllide_A_dehydrogenase_OS=Achromobacter_marplatensis_OX=470868_GN=DFP87_1017…
3	n19277	1	0	39	1	15	0	0	3.78127e-08	0.00047463	0.706187	6.25023	GGCAGCTCGTCCACGCCAGTCAGTGCAAACACGCCGCGGATGCGCGCGCCGGCCTTGACCG	61	tr|A0A0M7HI51|A0A0M7HI51_9BURK_Probable_enoyl-CoA_hydratase_1_OS=Achromobacter_aegrifaciens_OX=1287736_GN=ERS370000_02654_PE=4_SV=1~~~tr|A0A658AC09|A0A658AC09_ALCXX_MaoC_family_dehydratase_OS=Alcaligenes_xylosoxydans_xylosoxydans_OX=85698_GN=DAI43_14525_PE=4_SV=1~~~tr|E3HJ07|E3HJ07_ACHXA_Nodulation_protein_N_OS=Achromobacter_xylosoxidans_(strain_A8)_OX=762376_GN=AXYL_03429_PE=4_SV=1~~~tr|A0A7D4IC…
3	n19530	1	0	39	1	15	0	0	3.78127e-08	0.00047463	0.706187	6.25023	CACGGAGGCGTCTTCAAACATCATTTCCACGTCGATCATGGCCGAGTTTCCGAAGAAGGAA	61	tr|A0A5K6EM33|A0A5K6EM33_ALCXX_Secretion_protein_OS=Alcaligenes_xylosoxydans_xylosoxydans_OX=85698_GN=AL520_26820_PE=4_SV=1~~~tr|A0A3Q9KJV4|A0A3Q9KJV4_9BURK_FHA_domain-containing_protein_OS=Achromobacter_spanius_OX=217203_GN=ELS24_10620_PE=3_SV=1~~~tr|A0A448C074|A0A448C074_9BURK_Pertussis_toxin_liberation_protein_H_OS=Achromobacter_spanius_OX=217203_GN=ptlH_1_PE=3_SV=1~~~tr|A0A424WAX2|A0A424WAX2_…
3	n19691	1	0	39	1	15	0	0	3.78127e-08	0.00047463	0.706187	6.25023	GTAATTATTTCTTGCTATGTGTGTAACTTCGTGGCTAAACATTGCCGTCGTAACGAATTGGGCGCCGTTTTGTAAAATCTACTCGCGGTG	90
3	n19747	1	0	39	1	15	0	0	3.78127e-08	0.00047463	0.706187	6.25023	TCAAACATGCAGGGGTGGATCATCGAGTTGACGGCGCGGCATTTGGAAACGCGCACGTTCT	61	tr|A0A0M7J3D2|A0A0M7J3D2_9BURK_Uncharacterized_protein_OS=Achromobacter_aegrifaciens_OX=1287736_GN=ERS370000_03563_PE=4_SV=1~~~tr|A0A658AGE6|A0A658AGE6_ALCXX_Uncharacterized_protein_OS=Alcaligenes_xylosoxydans_xylosoxydans_OX=85698_GN=DAI43_14230_PE=4_SV=1~~~tr|A0A424W691|A0A424W691_ALCXX_Uncharacterized_protein_OS=Alcaligenes_xylosoxydans_xylosoxydans_OX=85698_GN=DY367_26035_PE=4_SV=1~~~tr|A0A6S…
3	n19811	1	0	39	1	15	0	0	3.78127e-08	0.00047463	0.706187	6.25023	GTCCGGCGCTACGGTGGGAAACATGGAGGTATACCTTTCCGAAGAGGAGGACTACCGGCCC	61	tr|A0A0M7GSV2|A0A0M7GSV2_9BURK_Uncharacterized_protein_OS=Achromobacter_aegrifaciens_OX=1287736_GN=ERS370000_02371_PE=4_SV=1~~~tr|A0A658A4E4|A0A658A4E4_ALCXX_Uncharacterized_protein_OS=Alcaligenes_xylosoxydans_xylosoxydans_OX=85698_GN=DAI43_37470_PE=4_SV=1~~~tr|A0A424WB43|A0A424WB43_ALCXX_Uncharacterized_protein_OS=Alcaligenes_xylosoxydans_xylosoxydans_OX=85698_GN=DY367_17925_PE=4_SV=1~~~tr|E3HI9…
3	n19948	1	0	39	1	15	0	0	3.78127e-08	0.00047463	0.706187	6.25023	TGGCCGCGAAACAGAGTTCGGGATCGGGCAGGGCCACGGCGAAGTTCCCGCCCAGGCAGAT	61	tr|A0A424W3V8|A0A424W3V8_ALCXX_CbbBc_protein_OS=Alcaligenes_xylosoxydans_xylosoxydans_OX=85698_GN=DY367_30505_PE=3_SV=1~~~tr|A0A246Q6M6|A0A246Q6M6_9BURK_CbbBc_protein_OS=Achromobacter_sp._HZ28_OX=2015171_GN=CEY04_14580_PE=3_SV=1~~~tr|A0A658AGC2|A0A658AGC2_ALCXX_CbbBc_protein_OS=Alcaligenes_xylosoxydans_xylosoxydans_OX=85698_GN=DAI43_02700_PE=3_SV=1~~~tr|A0A0M7DQX8|A0A0M7DQX8_9BURK_Putative_format…
3	n19970	1	0	39	1	15	0	0	3.78127e-08	0.00047463	0.706187	6.25023	ACAGCAAGGACGATTTGATGTGAAACAAACAGCAAGCGACTCGGAGCAAGCGACCCTGTGGAATCTTTTACGTGGAGAGGTGCTGCGAATAAAAAATAGGGCGAGTCTGAAAACCGGCGGTAG	123	tr|A0A7D4HSX5|A0A7D4HSX5_9BURK_Glycosyltransferase_family_9_protein_OS=Achromobacter_pestifer_OX=1353889_GN=FOC84_22425_PE=4_SV=1~~~tr|A0A6S7FEU7|A0A6S7FEU7_9BURK_Uncharacterized_protein_OS=Achromobacter_insolitus_OX=217204_GN=LMG6000_03528_PE=4_SV=1~~~tr|A0A2I8DN18|A0A2I8DN18_9BURK_C4-dicarboxylate_ABC_transporter_OS=Achromobacter_sp._AONIH1_OX=1758194_GN=C2U31_23300_PE=4_SV=1~~~tr|A0A6S7ETM2|A0…
3	n19975	1	0	39	1	15	0	0	3.78127e-08	0.00047463	0.706187	6.25023	GCCGGGATTTACATCATCTGCTGAAACAGCAAGGGGAATGAAATGGGATTCAAGAAACTGA	61	tr|A0A446CMK9|A0A446CMK9_9BURK_Amidase_AmiD_OS=Achromobacter_veterisilvae_OX=2069367_GN=amiD_4_PE=4_SV=1~~~tr|A0A095UUN0|A0A095UUN0_9BURK_Amidase_domain-containing_protein_OS=Achromobacter_sp._RTa_OX=1532557_GN=JL37_17470_PE=4_SV=1~~~tr|A0A5N7ZFR8|A0A5N7ZFR8_9BURK_Amidase_OS=Achromobacter_sp._OX=134375_GN=E2603_01435_PE=4_SV=1~~~tr|A0A6J5CNY3|A0A6J5CNY3_ACHDE_Amidase_OS=Achromobacter_denitrifican…
3	n20067	1	0	39	1	15	0	0	3.78127e-08	0.00047463	0.706187	6.25023	GACGCGGTGCTCGGTTCCTGGCGGTATCCATGCCACGCGGATGGGAGGCAGCACGGCAATCTGCCCTGGCATCGCGAGGCGGATGGAGCCCGCATGGGCAAACAGCAGCTGGCCCCGGCCGTGGCTATGCGGGCCGGAGTCGTGC	145	tr|A0A3S4Q4Y3|A0A3S4Q4Y3_9BURK_HTH-type_transcriptional_repressor_of_iron_proteins_A_OS=Achromobacter_spanius_OX=217203_GN=ripA_2_PE=4_SV=1~~~tr|A0A366FYR9|A0A366FYR9_9BURK_AraC_family_transcriptional_regulator_OS=Achromobacter_marplatensis_OX=470868_GN=DFP87_105227_PE=4_SV=1~~~tr|J4QMN8|J4QMN8_9BURK_Transcriptional_regulator_OS=Achromobacter_marplatensis_OX=470868_GN=QWC_23130_PE=4_SV=1~~~tr|A0A…
3	n20073	1	0	39	1	15	0	0	3.78127e-08	0.00047463	0.706187	6.25023	CCGCGCCGACGGGCGGCCTACGAAGCGCAGGAAACAGCAGTCAAATCCCGGGCAACCGCATCACCCTCGAACCAGCAACACCACAGCATGCAGCACCACCCCTATCAACCCGCCCACCAAGGTGC	125	tr|A0A6S7AMG7|A0A6S7AMG7_9BURK_Proline/betaine_transporter_OS=Achromobacter_kerstersii_OX=1353890_GN=proP_5_PE=4_SV=1~~~tr|A0A6S7ANH7|A0A6S7ANH7_9BURK_Uncharacterized_protein_OS=Achromobacter_deleyi_OX=1353891_GN=LMG3458_05737_PE=4_SV=1~~~tr|D4XED5|D4XED5_9BURK_Uncharacterized_protein_OS=Achromobacter_piechaudii_ATCC_43553_OX=742159_GN=HMPREF0004_3832_PE=4_SV=1~~~tr|E3HM89|E3HM89_ACHXA_Uncharacte…
3	n20095	1	0	39	1	15	0	0	3.78127e-08	0.00047463	0.706187	6.25023	GACGACGGACGCATCGTTGATGGAAGCGAAACAGCAGGTTCCGGCCACGGGTTTGGCGTCC	61	tr|A0A2I8DGZ3|A0A2I8DGZ3_9BURK_Microcystinase_C_OS=Achromobacter_sp._AONIH1_OX=1758194_GN=C2U31_12005_PE=3_SV=1~~~tr|A0A0M7CBS0|A0A0M7CBS0_9BURK_Microcystinase_C_OS=Achromobacter_aegrifaciens_OX=1287736_GN=ERS370000_00229_PE=3_SV=1~~~tr|A0A0M7KJ51|A0A0M7KJ51_ALCXX_Uncharacterized_iron-regulated_membrane_protein_OS=Alcaligenes_xylosoxydans_xylosoxydans_OX=85698_GN=ERS369984_04660_PE=4_SV=1~~~tr|A0…
3	n20171	1	0	39	1	15	0	0	3.78127e-08	0.00047463	0.706187	6.25023	TAAGAGGGAGGCGGAGGGCTATTGGGAGGTATTGAAGTCCATTGGCCGTGACACCACGCTGGACGAGGAGATCAAAAAGGTTCAGGAGCGGATTCGACAGCGTGAGCAGCGGCTGGAGCGGGGGGCGCTGTCCGATGTGAATCGTCGCCGCACCGAGATGAACTTGGCGTCCGACCGCGCCGAGCTTTCTTCGCTGCAGGATAAGAAAGGCATCGAAGACGCAACAGAACAGATCAAGGGCTTGAACGCAGCGGCGGAGAAGGCAGCAATCGAGGCCAAGAAAGAGCTCTTGAAGCTTGATCTGGCTGCCGATAAGGGGAAACAGCTCAAGGAGGCGCTGAAGAAGCTAGATTCCTGGGTCATTGATACCAAGATAGTAAGTCCCAATGATCCAGACAT…	532	tr|A0A2N8KDL4|A0A2N8KDL4_9BURK_Phage_tail_tape_measure_protein_OS=Achromobacter_pulmonis_OX=1389932_GN=C1I89_22185_PE=4_SV=1~~~tr|A0A3S4RUV8|A0A3S4RUV8_9BURK_Phage-related_minor_tail_protein_OS=Achromobacter_spanius_OX=217203_GN=NCTC13519_04478_PE=4_SV=1~~~tr|A0A095V2M9|A0A095V2M9_9BURK_Uncharacterized_protein_OS=Achromobacter_sp._RTa_OX=1532557_GN=JL37_11120_PE=4_SV=1~~~tr|A0A0D6I221|A0A0D6I221_…
3	n20189	1	0	39	1	15	0	0	3.78127e-08	0.00047463	0.706187	6.25023	CAACAGCCGCGGATCGTCCAGGAAAGCCGCAAACAGCTCGCGCACGATGCGCCGCGCCTTG	61	tr|A0A6S6ZK85|A0A6S6ZK85_9BURK_Deoxyguanosinetriphosphate_triphosphohydrolase-like_protein_OS=Achromobacter_deleyi_OX=1353891_GN=LMG3458_01533_PE=3_SV=1~~~tr|J4J632|J4J632_9BURK_Deoxyguanosinetriphosphate_triphosphohydrolase-like_protein_OS=Achromobacter_marplatensis_OX=470868_GN=QWC_27931_PE=3_SV=1~~~tr|A0A3C1XXM8|A0A3C1XXM8_9BURK_Deoxyguanosinetriphosphate_triphosphohydrolase-like_protein_OS=Ac…
3	n20238	1	0	39	1	15	0	0	3.78127e-08	0.00047463	0.706187	6.25023	TCTTGCAGATACATCCATTGCGGCTGGCCGCCGGGCTGGAGGGCAAACAGCGCTGTTGCCCGGCGCTGGGTCGCGCCCGCGGTCCAG	87	tr|A0A7D4IKT5|A0A7D4IKT5_9BURK_Tripartite_tricarboxylate_transporter_substrate_binding_protein_OS=Achromobacter_pestifer_OX=1353889_GN=FOC84_12200_PE=3_SV=1~~~tr|H0FFG2|H0FFG2_9BURK_Rhs_element_Vgr_family_protein_1_OS=Achromobacter_arsenitoxydans_SY8_OX=477184_GN=KYC_27658_PE=3_SV=1~~~tr|A0A095UMK6|A0A095UMK6_9BURK_ABC_transporter_ATP-binding_protein_OS=Achromobacter_sp._RTa_OX=1532557_GN=JL37_19…
3	n20243	1	0	39	1	15	0	0	3.78127e-08	0.00047463	0.706187	6.25023	CGTGCGCCTGAGCAAACAGCGCTGGACGCGGGGAGGCAACCGCAACGACCTGAGTGCGGCGGG	63	tr|E3HLJ7|E3HLJ7_ACHXA_Surface_antigen_variable_number_repeat_family_protein_OS=Achromobacter_xylosoxidans_(strain_A8)_OX=762376_GN=AXYL_06038_PE=4_SV=1~~~tr|A0A424WJ51|A0A424WJ51_ALCXX_ShlB/FhaC/HecB_family_hemolysin_secretion/activation_protein_OS=Alcaligenes_xylosoxydans_xylosoxydans_OX=85698_GN=DY367_03020_PE=4_SV=1~~~tr|A0A0M7LGY7|A0A0M7LGY7_9BURK_Heme/hemopexin_transporter_protein_huxB_OS=A…
3	n20505	1	0	39	1	15	0	0	3.78127e-08	0.00047463	0.706187	6.25023	CACGTCGGAAGGGAAACAGGCCTGGTCGCCGGTGTATTCGACGATCAGGGTGGGCTGATGGATGCCGCCGGCGGTGCGCGCCATGCTGGC	90	tr|A0A6S7DZP6|A0A6S7DZP6_9BURK_Haemagg_act_domain-containing_protein_OS=Achromobacter_ruhlandii_OX=72557_GN=LMG3328_03187_PE=4_SV=1~~~tr|A0A848NG75|A0A848NG75_9BURK_Filamentous_hemagglutinin_OS=Achromobacter_ruhlandii_OX=72557_GN=HGQ98_09690_PE=4_SV=1~~~tr|A0A6S7EHC8|A0A6S7EHC8_9BURK_Haemagg_act_domain-containing_protein_OS=Achromobacter_pulmonis_OX=1389932_GN=LMG26788_04865_PE=4_SV=1~~~tr|A0A2S8…
3	n20560	1	0	39	1	15	0	0	3.78127e-08	0.00047463	0.706187	6.25023	GCTGGCGCAGGGCTACGGCACGCGCGAGGCCGGCAAACAGGCGCCGGTGGATGCGCAGACCGTGTTCCAGATCGCATCG	79	tr|A0A2S0ICR3|A0A2S0ICR3_9BURK_D-alanyl-D-alanine-carboxypeptidase/endopeptidase_AmpH_OS=Achromobacter_spanius_OX=217203_GN=CLM73_23240_PE=4_SV=1~~~tr|A0A811GRU3|A0A811GRU3_9BURK_D-alanyl-D-alanine-carboxypeptidase/endopeptidase_AmpH_OS=Achromobacter_mucicolens_OX=1389922_GN=ampH_PE=4_SV=1~~~tr|A0A0Q8BFX8|A0A0Q8BFX8_9BURK_Beta-lactam-binding_protein_OS=Achromobacter_sp._Root565_OX=1736564_GN=ASD7…
3	n20563	1	0	39	1	15	0	0	3.78127e-08	0.00047463	0.706187	6.25023	CTGGAAGGCCAGCGACGCGCTGATGCGCGCAAACAGGTAATGCAGGAAGGCGGGACGTTGCAGCGGACTGGGGGAGTCGGGGGCGGGCATG	91	tr|A0A6S7F9K4|A0A6S7F9K4_9BURK_Enterobactin_exporter_EntS_OS=Achromobacter_insolitus_OX=217204_GN=entS_2_PE=4_SV=1~~~tr|A0A0M7J5P9|A0A0M7J5P9_9BURK_Enterobactin_exporter_EntS_OS=Achromobacter_aegrifaciens_OX=1287736_GN=entS_PE=4_SV=1~~~tr|A0A7D4I7Z6|A0A7D4I7Z6_9BURK_MFS_transporter_OS=Achromobacter_pestifer_OX=1353889_GN=FOC84_12285_PE=4_SV=1~~~tr|E3HP86|E3HP86_ACHXA_Major_facilitator_superfamily…
3	n20642	1	0	39	1	15	0	0	3.78127e-08	0.00047463	0.706187	6.25023	ATCGCCTGAACAGATGTGCCAGGTGTTCGGTTCGATGCCGCGCGCCAAACAGGTGATCCTGGGCCATTGGGAAGCCTGC	79	tr|Q9AF71|Q9AF71_ACHDE_Aminoglycoside_3\'-phosphotransferase_OS=Achromobacter_denitrificans_OX=32002_GN=aph_PE=3_SV=1~~~tr|A0A2N8KJ01|A0A2N8KJ01_9BURK_Peptide_ABC_transporter_ATP-binding_protein_OS=Achromobacter_pulmonis_OX=1389932_GN=C1I89_13145_PE=4_SV=1~~~tr|A0A6S7CTN0|A0A6S7CTN0_9BURK_DSBA_domain-containing_protein_OS=Achromobacter_dolens_OX=1287738_GN=LMG26841_01711_PE=4_SV=1~~~tr|A0A7U0I449…
3	n20675	1	0	39	1	15	0	0	3.78127e-08	0.00047463	0.706187	6.25023	CCCAGGCTGATGCGGCCGAACTGGCTGACGATGCCGTCGGCAGGACTGGTCCAGTCCGCATCGGCCAGCTTGCGGGCGCCAGGGCGCAGGGCGCGCGTGAAGAAGGCATTGAAACTGTCATAGGCCCTGGGGTCGGCGTGCAGGGCTTCGGCGAGATCGATGCCGTACCACTTGGCATAGCCGCGTATCAGCGGCTGGGCCACCCATGGCTGGCGGCATGCGGCCAGCCAGCCGGCGCAACGTGTCAACCAGCGCCTGGGCGTAATGCGGTGGATAAACAGGGAAAGAGAGGTAGACATGACACTCGCGTTCGCGTGATGGCGGTTATTGTCCTGAATCATAGTGTAGTATGGCA	355	tr|A0A2S0I2K1|A0A2S0I2K1_9BURK_Uncharacterized_protein_OS=Achromobacter_spanius_OX=217203_GN=CLM73_02100_PE=4_SV=1~~~tr|A0A6S7AE16|A0A6S7AE16_9BURK_Uncharacterized_protein_OS=Achromobacter_animicus_OX=1389935_GN=LMG26690_04496_PE=4_SV=1~~~tr|A0A8B5UWH3|A0A8B5UWH3_9BURK_Uncharacterized_protein_OS=Achromobacter_sp._SLBN-14_OX=2768442_GN=FBY20_1830_PE=4_SV=1~~~tr|A0A811H2G3|A0A811H2G3_9BURK_Uncharac…
3	n20716	1	0	39	1	15	0	0	3.78127e-08	0.00047463	0.706187	6.25023	AGATCAAGGCCCAGAGCGAGTGGGCCAAGACATACGGTCTACTAACCGGAATCTGCGGCATTGGGCCGATCAATGGCGCTGCCCTGACAACCTTGTTCAACCGCGTTCACTTCGCGAGCAGCGATGCTGCGGTCGCCTTCTGCGGGCTGGATCCCAGGCCAAACGAGTCTGGCAGAAAGGTCGGTAGGCGACGCCTGAGCAAACAGGGCGACAAGGCGGCCAGGACGCTGCTGTACAACGCGGCTAGCTCGGCGGCTCGCACGGTTTACTTCAAGGATTACTACGCCATGCTCAGGG	297	tr|A0A8B5USC0|A0A8B5USC0_9BURK_Transposase_OS=Achromobacter_sp._SLBN-14_OX=2768442_GN=FBY20_1684_PE=4_SV=1~~~tr|A0A854Q4H0|A0A854Q4H0_9BURK_IS110_family_transposase_OS=Achromobacter_sp._KAs_3-5_OX=1915388_GN=BMR85_000080_PE=4_SV=1~~~tr|A0A8B5UXJ7|A0A8B5UXJ7_9BURK_Transposase_OS=Achromobacter_sp._SLBN-14_OX=2768442_GN=FBY20_1693_PE=4_SV=1~~~tr|A0A8B5UUS0|A0A8B5UUS0_9BURK_Transposase_OS=Achromobact…
3	n20776	1	0	39	1	15	0	0	3.78127e-08	0.00047463	0.706187	6.25023	CAGCCTGACCGCGCGCCCCGATGGCATCACCGCTTTGATCGGTGCCAACGGCGCCGGCAAATCGTCGCTGATGCGGGCGATATCCGGAGTCACGCCGATCAGGGGCGGGCAGATCCTGCTGGATGGAGAAGACATATCCCGCTTGCCGCCGCATGAACGCGCGCGGCGAGGGCTGGCGCATGCCATGGAGGGGCGGCGCATCTTCCACCAGCACACCGTCGAGGAAAATCTGATCACAGCCTGGCATTTCCGCAAACCAAAGGGAAACTTCAAGGTCGCCGTGGAACAGGTGTACGGCAATTTCCCAGTCCTGGCGCAACGCCGAACGGCGAAGGCTGGGACCCTTAGCGGGGGCCAGCAGCAGATGCTGATCCTGTCCATG	382	tr|A0A7X9W3F3|A0A7X9W3F3_9BURK_ABC_transporter_ATP-binding_protein_OS=Achromobacter_sp._Bel_OX=2727415_GN=HG262_18225_PE=4_SV=1~~~tr|A0A0D6FQN0|A0A0D6FQN0_ALCXX_ABC_transporter_ATP-binding_protein_OS=Alcaligenes_xylosoxydans_xylosoxydans_OX=85698_GN=livF_4_PE=4_SV=1~~~tr|F7TAK4|F7TAK4_9BURK_ABC_transporter_family_protein_65_OS=Achromobacter_insuavis_AXX-A_OX=1003200_GN=AXXA_30032_PE=4_SV=1~~~tr|A…
3	n20797	1	0	39	1	15	0	0	3.78127e-08	0.00047463	0.706187	6.25023	AACCCGAGGCGAACGTCGGCCGCTACGACATCCGCCGAGTCATCGGCAAGCGTGAATGGAAGGTCTCCCTCAAGACACGGCATCTCCCCGAAGCACGTCTTCGCTTCATTGGGGAAGCACAACGCTGCGAAGAAGCCTTCACTGCAGCGCGAGACCAACTCGCAGGGATCTCCCGCGTCTTACCCTCAGCTGCAATCAAGCTGGCCGACAGATGGGCTAAGGCTGTTCTGCAGGAATGGGAAACCAACCCCGAGAAGGTGAAAGACTTCTTGGCTGTGTCCGATACAGGCTCGGATCTCGACTACCTCCCCGTCTCTGACTTTGTGGGCATGGATACACCCGTGGCCCTCACCGAGGCGCTTTCCGGCTTCATCCGTAACACACTTCATCAGCTCAACC…	586	tr|A0A2I8DBC8|A0A2I8DBC8_9BURK_LZ_Tnp_IS66_domain-containing_protein_OS=Achromobacter_sp._AONIH1_OX=1758194_GN=C2U31_00905_PE=4_SV=1~~~tr|A0A848NHY9|A0A848NHY9_9BURK_M48_family_metallopeptidase_(Fragment)_OS=Achromobacter_ruhlandii_OX=72557_GN=HGQ98_10095_PE=4_SV=1~~~tr|A0A246Q3K3|A0A246Q3K3_9BURK_Epimerase_OS=Achromobacter_sp._HZ28_OX=2015171_GN=CEY04_20515_PE=4_SV=1
3	n20880	1	0	39	1	15	0	0	3.78127e-08	0.00047463	0.706187	6.25023	TTCGGATCCCTCCGCCCGGCCACCGGCTCAAAGCATCTGCCCATGAATCGGCCTGAAACCAATGCATAAGGCTGCTGTCAGCCGAGGCAGCCCGGGGCCATCCGAAGCGCAGCCCCATTGGGACGAGCATCGGAATGGCGCAGGGCCGCCTCGGCGGCTAAAGAACCCTAACGCCCGCAAGCTCGAAGCCCTGCCGCTTCGGTT	204	tr|A0A366G315|A0A366G315_9BURK_FlaA1/EpsC-like_NDP-sugar_epimerase_OS=Achromobacter_marplatensis_OX=470868_GN=DFP87_103428_PE=3_SV=1~~~tr|A0A5N7ZIQ0|A0A5N7ZIQ0_9BURK_Polysaccharide_biosynthesis_protein_OS=Achromobacter_sp._OX=134375_GN=E2603_07400_PE=3_SV=1~~~tr|J4QSM7|J4QSM7_9BURK_Lipopolysaccharide_biosynthesis_protein_(Fragment)_OS=Achromobacter_marplatensis_OX=470868_GN=QWC_14622_PE=3_SV=1~~~…
3	n21037	1	0	39	1	15	0	0	3.78127e-08	0.00047463	0.706187	6.25023	GCTGGCCAGGTGCCGCGCCACCTGGTAGGAAACCACCTGCGTCAGCCCCCAACCCTCGCAGGCCGCGAGCACCGCGGCCTGGAAGGACGTGACCGTC	97	tr|A0A6S7FAH8|A0A6S7FAH8_9BURK_HTH-type_transcriptional_regulator_PgrR_OS=Achromobacter_insolitus_OX=217204_GN=pgrR_9_PE=3_SV=1~~~tr|A0A4Q1HJ32|A0A4Q1HJ32_9BURK_LysR_family_transcriptional_regulator_OS=Achromobacter_aloeverae_OX=1750518_GN=C7R54_11150_PE=3_SV=1~~~tr|A0A2N8KJK6|A0A2N8KJK6_9BURK_LysR_family_transcriptional_regulator_OS=Achromobacter_pulmonis_OX=1389932_GN=C1I89_14270_PE=3_SV=1~~~tr…
3	n21081	1	0	39	1	15	0	0	3.78127e-08	0.00047463	0.706187	6.25023	CAAGATCGCCGCTGAAACCACCGAGGTCACCGACACCGAATACCTGCAAAGCGAACTGATTGGCGAAGGCGGCGGCATCGAAGTCGATGGCCGCGGCACCGGCATCATGACCGAAAGC	118	tr|A0A7X9W0P3|A0A7X9W0P3_9BURK_Agmatine_deiminase_family_protein_OS=Achromobacter_sp._Bel_OX=2727415_GN=HG262_11815_PE=4_SV=1~~~tr|A0A7D4DX29|A0A7D4DX29_9BURK_Agmatine_deiminase_family_protein_OS=Achromobacter_pestifer_OX=1353889_GN=FOC84_12320_PE=4_SV=1~~~tr|A0A658AGD6|A0A658AGD6_ALCXX_Agmatine_deiminase_(Fragment)_OS=Alcaligenes_xylosoxydans_xylosoxydans_OX=85698_GN=DAI43_14205_PE=4_SV=1~~~tr|A…
3	n21123	1	0	39	1	15	0	0	3.78127e-08	0.00047463	0.706187	6.25023	GCCACGCAAACCACCGCCGCCAGCGTCACGGCCAGCATCGTCCAGCTGACCTGCTCATGCA	61	tr|A0A6S7FCL0|A0A6S7FCL0_9BURK_Uncharacterized_protein_OS=Achromobacter_insolitus_OX=217204_GN=LMG6000_03828_PE=4_SV=1~~~tr|A0A095UGH5|A0A095UGH5_9BURK_Transporter_OS=Achromobacter_sp._RTa_OX=1532557_GN=JL37_26790_PE=4_SV=1~~~tr|A0A424WIR7|A0A424WIR7_ALCXX_DMT_family_transporter_OS=Alcaligenes_xylosoxydans_xylosoxydans_OX=85698_GN=DY367_04430_PE=4_SV=1~~~tr|A0A658A6E3|A0A658A6E3_ALCXX_EamA_family…
3	n21362	1	0	39	1	15	0	0	3.78127e-08	0.00047463	0.706187	6.25023	CGATGCCATCCTGGCCCAAACCATCAGCGGTAGCGGCAGCCTGATCAAGACGGGCGATGCC	61	tr|A0A0M9I3U4|A0A0M9I3U4_9BURK_Extracellular_serine_protease_OS=Achromobacter_aegrifaciens_OX=1287736_GN=ERS370000_00958_PE=4_SV=1~~~tr|H0F7X8|H0F7X8_9BURK_Outer_membrane_autotransporter_OS=Achromobacter_arsenitoxydans_SY8_OX=477184_GN=KYC_14382_PE=4_SV=1~~~tr|A0A7D4DZ81|A0A7D4DZ81_9BURK_Autotransporter-associated_beta_strand_repeat-containing_protein_OS=Achromobacter_pestifer_OX=1353889_GN=FOC84…
3	n21534	1	0	39	1	15	0	0	3.78127e-08	0.00047463	0.706187	6.25023	AATGCTGGGTTCGTTCATGCTGTCTCCTGGGTTCACGCGCAGAGCTTGCGCGCGGCGGCTATGACATCGGCCTCTTGGGGCTGGTACTGTTCTTCGAGCGATGGAGCGAATGGCACCGGAACGAAGGGCGCCGCGACACGAGCGATGGGCGCGTCGAGTTCGTCAAAACCTATGTCCGCCATTCGTGCAGCGATCTCGGCGCCGACCCCGAATGCCTCCACGGCTTCGTGCACGATGAGCAGCCGATGGGTGCGTTTGAGCGATGCCAGCACCGCCTGTTCGTCCCAGGGCTGGATGCTGCGAAGATCCAGCACCTCGGCCTCGATGCCGTCGGCAACCAGGGCCTCGGCGGCCCGCAAGGCCTTGTGCACGGTCGCGCCGTAGCTCACCACGGTCAGG…	981	tr|J4J6G3|J4J6G3_9BURK_Spermine/spermidine_synthase_family_protein_1_OS=Achromobacter_marplatensis_OX=470868_GN=QWC_24282_PE=4_SV=1~~~tr|A0A366G5E0|A0A366G5E0_9BURK_Spermidine_synthase_OS=Achromobacter_marplatensis_OX=470868_GN=DFP87_103883_PE=4_SV=1~~~tr|A0A095VF64|A0A095VF64_9BURK_Spermidine_synthase_OS=Achromobacter_sp._RTa_OX=1532557_GN=JL37_03245_PE=4_SV=1~~~tr|A0A6S7D395|A0A6S7D395_9BURK_Po…
3	n21764	1	0	39	1	15	0	0	3.78127e-08	0.00047463	0.706187	6.25023	CGGCCAGCAGGGAAACCAGCGCCAGGGCGGGCGCGCAGGTGCGGATCTTCATTTTTCTGTT	61
3	n21789	1	0	39	1	15	0	0	3.78127e-08	0.00047463	0.706187	6.25023	GAAGAAATCCGCGAAGAAGCGCCGGTGCACGATGACGCCCGAAACCAGCGCCGCCAGCAGCGCCAAGGTAGAGGCGCCGACCACCCAGATGCCGGCCTGGC	101	tr|A0A446CGS4|A0A446CGS4_9BURK_Uncharacterized_protein_OS=Achromobacter_veterisilvae_OX=2069367_GN=AVE30378_02414_PE=4_SV=1~~~tr|A0A6N0JGC1|A0A6N0JGC1_ACHDE_PepSY_domain-containing_protein_OS=Achromobacter_denitrificans_OX=32002_GN=FOC81_05255_PE=4_SV=1~~~tr|A0A6S6Z856|A0A6S6Z856_9BURK_Uncharacterized_protein_OS=Achromobacter_pestifer_OX=1353889_GN=LMG3431_03035_PE=4_SV=1~~~tr|E3HKB8|E3HKB8_ACHXA…
3	n21822	1	0	39	1	15	0	0	3.78127e-08	0.00047463	0.706187	6.25023	GCCGTCCCCGCCCAAGGAAACCAGTTCGGCGGTGTCCGCGCCGCCCGCCCCGCCGCTGCCG	61	tr|A0A0M7HYJ0|A0A0M7HYJ0_9BURK_Uncharacterized_protein_with_a_C-terminal_OMP_(Outer_membrane_protein)_domain_OS=Achromobacter_aegrifaciens_OX=1287736_GN=ERS370000_02914_PE=4_SV=1~~~tr|A0A7D4I4I8|A0A7D4I4I8_9BURK_Autotransporter_outer_membrane_beta-barrel_domain-containing_protein_OS=Achromobacter_pestifer_OX=1353889_GN=FOC84_29560_PE=4_SV=1~~~tr|E3HES1|E3HES1_ACHXA_Outer_membrane_autotransporter_…
3	n21889	1	0	39	1	15	0	0	3.78127e-08	0.00047463	0.706187	6.25023	GGCGAAACCAGGTGCACCACCATCAACACGTCGGGTGAGGTCTTCTGCGTGACCACCCCGATGCGCTGCACTTCC	75	tr|A0A6S7AII6|A0A6S7AII6_9BURK_Efflux_pump_membrane_transporter_OS=Achromobacter_deleyi_OX=1353891_GN=oqxB23_PE=3_SV=1~~~tr|A0A6S7CFL5|A0A6S7CFL5_9BURK_Efflux_pump_membrane_transporter_OS=Achromobacter_piechaudii_OX=72556_GN=oqxB21_PE=3_SV=1~~~tr|A0A095WSG1|A0A095WSG1_9BURK_Efflux_pump_membrane_transporter_OS=Achromobacter_sp._RTa_OX=1532557_GN=JL37_19650_PE=3_SV=1~~~tr|A0A1R1JT02|A0A1R1JT02_ALCX…
3	n21913	1	0	39	1	15	0	0	3.78127e-08	0.00047463	0.706187	6.25023	GGAAATCGAAACCAGGGCGTGCGGAGCCGGCGCCTGCCAGAACTC	45	tr|A0A6S7F416|A0A6S7F416_9BURK_Ureidoglycolate_lyase_OS=Achromobacter_insolitus_OX=217204_GN=allA_2_PE=4_SV=1~~~tr|A0A6S6ZGT2|A0A6S6ZGT2_9BURK_Ureidoglycolate_lyase_OS=Achromobacter_pestifer_OX=1353889_GN=allA_2_PE=4_SV=1~~~tr|A0A7X9W0W4|A0A7X9W0W4_9BURK_Ureidoglycolate_hydrolase_OS=Achromobacter_sp._Bel_OX=2727415_GN=HG262_11960_PE=4_SV=1~~~tr|J4QUU3|J4QUU3_9BURK_Ureidoglycolate_hydrolase_family…
3	n21923	1	0	39	1	15	0	0	3.78127e-08	0.00047463	0.706187	6.25023	CGATGCCGCGGCCAGCGCCAGGCCGCTTTCACCGAAACCCAACCAGGCCTCCTGCGAGCGGGCGAAAAGAAAAGGACCCAGCTGGTAATAGCCGAAGATCGCCAGGTTGAAAATGGCGATCAGC	124	tr|A0A2S8VCE6|A0A2S8VCE6_9BURK_Collar_domain-containing_protein_OS=Achromobacter_sp._MYb9_OX=1827284_GN=CQ050_14430_PE=4_SV=1~~~tr|A0A6S7FFN1|A0A6S7FFN1_9BURK_Multidrug_resistance_protein_MdtL_OS=Achromobacter_insolitus_OX=217204_GN=mdtL_PE=4_SV=1~~~tr|A0A095VF99|A0A095VF99_9BURK_Membrane_protein_OS=Achromobacter_sp._RTa_OX=1532557_GN=JL37_03235_PE=3_SV=1~~~tr|A0A246Q5Q3|A0A246Q5Q3_9BURK_Excinucl…
3	n22110	1	0	39	1	15	0	0	3.78127e-08	0.00047463	0.706187	6.25023	GGTCAGCAAGAACATCGCCGAACTGGAAACCCATCTGGCGGCGCGCCTGCTCAACCGCACCACC	64	tr|A0A176XK91|A0A176XK91_ALCXX_LysR_family_transcriptional_regulator_OS=Alcaligenes_xylosoxydans_xylosoxydans_OX=85698_GN=A7J67_04485_PE=3_SV=1~~~tr|F7TAT3|F7TAT3_9BURK_LysR_family_regulatory_helix-turn-helix_protein_141_OS=Achromobacter_insuavis_AXX-A_OX=1003200_GN=AXXA_30427_PE=3_SV=1~~~tr|A0A7T4AZ15|A0A7T4AZ15_9BURK_LysR_family_transcriptional_regulator_OS=Achromobacter_deleyi_OX=1353891_GN=I6…
3	n22208	1	0	39	1	15	0	0	3.78127e-08	0.00047463	0.706187	6.25023	GGTATCGAAACCCAGCTGCCGCGCCAGGCGCAGCATGACGCCGGCCTGCACGCCGGCATGG	61	tr|A0A6S7DIA6|A0A6S7DIA6_9BURK_Uncharacterized_protein_OS=Achromobacter_anxifer_OX=1287737_GN=LMG26858_03415_PE=4_SV=1~~~tr|A0A424W540|A0A424W540_ALCXX_MurR/RpiR_family_transcriptional_regulator_OS=Alcaligenes_xylosoxydans_xylosoxydans_OX=85698_GN=DY367_28480_PE=4_SV=1~~~tr|A0A0M9IWX0|A0A0M9IWX0_9BURK_Bifunctional_glucokinase/RpiR_family_transcriptional_regulator_OS=Achromobacter_aegrifaciens_OX=…
3	n22241	1	0	39	1	15	0	0	3.78127e-08	0.00047463	0.706187	6.25023	CGAACTGAGCCTGCGCCAGATTGATCCCGCAGTGATCCGCGAGGACGCGCGGCGTTATGGTCCCCAGCTTGAACACGTCGCGCGCCAGGCGATCGAGCAATGGCTGGACCAGATCTGAGTCTGTCCTATGCCCTGGCGCGTCCTGGCGACGAGGACGCTGCGCAACCATAGCCTTGCATAGGCGCAAGGGGCGCGCTGCGCCCCGTTCCAATTCGCCGCGGCCTGCGGCTCTCGGCGCTTCTTCCGCTCGCCATCTCTACCGCTGAATCTAAGGGTTAAACCCAGTAGCCGCTTCGATGTCCGATGAATAGGATCCCGTTTTATACAAATGGGATCCCATTTGTGTTTGTCACTTTTCTTTCTTCAGGACGGACAGCACATGACCAGCATCGACACCAT…	430	tr|A0A6S7F4M8|A0A6S7F4M8_9BURK_Cupin_7_domain-containing_protein_OS=Achromobacter_insolitus_OX=217204_GN=LMG6000_04117_PE=4_SV=1~~~tr|A0A2I8DMN7|A0A2I8DMN7_9BURK_Cupin_7_domain-containing_protein_OS=Achromobacter_sp._AONIH1_OX=1758194_GN=C2U31_23035_PE=4_SV=1~~~tr|A0A6S7D924|A0A6S7D924_9BURK_Cupin_7_domain-containing_protein_OS=Achromobacter_anxifer_OX=1287737_GN=LMG26858_02778_PE=4_SV=1~~~tr|A0A…
3	n22253	1	0	39	1	15	0	0	3.78127e-08	0.00047463	0.706187	6.25023	GGACCTGAACTACCAGTTCCACGTCATGCGACTGCTGCGGCAGGAAACCCAGGAGCACGGCCTGATCAGCGTCATCGTGCT	81	tr|A0A6S7E8Y6|A0A6S7E8Y6_9BURK_Fe(3+)_dicitrate_transport_ATP-binding_protein_FecE_OS=Achromobacter_pulmonis_OX=1389932_GN=fecE_PE=4_SV=1~~~tr|A0A6S7AN19|A0A6S7AN19_9BURK_Iron(3+)-hydroxamate_import_ATP-binding_protein_FhuC_OS=Achromobacter_kerstersii_OX=1353890_GN=fhuC_2_PE=4_SV=1~~~tr|A0A6S7ECT0|A0A6S7ECT0_9BURK_Fe(3+)_dicitrate_transport_ATP-binding_protein_FecE_OS=Achromobacter_dolens_OX=1287…
3	n22263	1	0	39	1	15	0	0	3.78127e-08	0.00047463	0.706187	6.25023	CTGCGCGGCGATGGCTTCGGGCAGCACCACAAAACCCAGGCGCAGCGCGGGGAACATGGTCTTGCTGAAG	70	tr|A0A811GQ49|A0A811GQ49_9BURK_HTH-type_transcriptional_regulatory_protein_GabR_OS=Achromobacter_mucicolens_OX=1389922_GN=gabR_2_PE=4_SV=1~~~tr|A0A176XLZ9|A0A176XLZ9_ALCXX_DNA-binding_protein_OS=Alcaligenes_xylosoxydans_xylosoxydans_OX=85698_GN=A7J67_10780_PE=3_SV=1~~~tr|A0A8B5V1M3|A0A8B5V1M3_9BURK_GntR_family_transcriptional_regulator_OS=Achromobacter_sp._SLBN-14_OX=2768442_GN=FBY20_4270_PE=4_SV…
3	n22277	1	0	39	1	15	0	0	3.78127e-08	0.00047463	0.706187	6.25023	CAAACCCAGGTAGGCGATGCCGGCCACGTTCAGCGCGGTGAGCGGCGGCAGGGCGGGCTCG	61	tr|A0A0M9I9X7|A0A0M9I9X7_9BURK_Uncharacterized_inner_membrane_transporter_yedA_OS=Achromobacter_aegrifaciens_OX=1287736_GN=yedA_PE=4_SV=1~~~tr|A0A424WKP5|A0A424WKP5_ALCXX_EamA_family_transporter_OS=Alcaligenes_xylosoxydans_xylosoxydans_OX=85698_GN=DY367_01175_PE=4_SV=1~~~tr|A0A6S7EQ77|A0A6S7EQ77_9BURK_Uncharacterized_protein_OS=Achromobacter_anxifer_OX=1287737_GN=LMG26858_05135_PE=4_SV=1~~~tr|E3H…
3	n22300	1	0	39	1	15	0	0	3.78127e-08	0.00047463	0.706187	6.25023	GTTCGAATAGGCGGACAAGCTGGGCGACGAATAGACGTTGCCCTTTGCGTTCTTGACTGCCCCCCAGCTGCCAGACATGCCCGATGTGTCTCCGGTCGCCACCTGGCCAGCAGCGGCATAGTTGGCAGCCACAGAAACCCCACTGAAGAGCATTCCGGATATGCTGGTCACGAATCCGACCATGGCCTGGCGCGCCGCAATCTTTGCGATATCCGCCAGAACGCTGCGGGTGAAGTCCGAGAAT	244	tr|A0A2S0IDS7|A0A2S0IDS7_9BURK_Phage_tail_tape_measure_protein_OS=Achromobacter_spanius_OX=217203_GN=CLM73_25355_PE=4_SV=1~~~tr|A0A2N8KEF7|A0A2N8KEF7_9BURK_Phage_tail_tape_measure_protein_OS=Achromobacter_pulmonis_OX=1389932_GN=C1I89_23825_PE=4_SV=1~~~tr|A0A8B5V3C8|A0A8B5V3C8_9BURK_Lambda_family_phage_tail_tape_measure_protein_OS=Achromobacter_sp._SLBN-14_OX=2768442_GN=FBY20_4121_PE=4_SV=1~~~tr|A…
3	n22599	1	0	39	1	15	0	0	3.78127e-08	0.00047463	0.706187	6.25023	CATAAACCCCGTCAAAGGCGATTTCGCCCAGGTTGCCTTCGCCGATGGGAAAG	53	tr|A0A6S7EUX4|A0A6S7EUX4_9BURK_2,3-dihydroxybenzoate-AMP_ligase_OS=Achromobacter_insolitus_OX=217204_GN=dhbE_1_PE=4_SV=1~~~tr|A0A6S6ZY78|A0A6S6ZY78_9BURK_Ferrichrome_receptor_FcuA_OS=Achromobacter_deleyi_OX=1353891_GN=fcuA_1_PE=3_SV=1~~~tr|A0A2M9H2Q3|A0A2M9H2Q3_9BURK_Ferrichrome_receptor_FcuA_OS=Achromobacter_ruhlandii_OX=72557_GN=fcuA_2_PE=3_SV=1~~~tr|A0A6J5A3F4|A0A6J5A3F4_9BURK_Ferrichrome_rece…
3	n22716	1	0	39	1	15	0	0	3.78127e-08	0.00047463	0.706187	6.25023	ATATAAGGGTAAACCCTTAATAATCATCACGAGCCAAGCCCAAGACTATAGCACGATTTTT	61
3	n22834	1	0	39	1	15	0	0	3.78127e-08	0.00047463	0.706187	6.25023	CGGCCGCTATGAAACCCTGATCAAGTCCGCTGGCATCAAGCCGGATTGAGCACGCGTCCCG	61	tr|A0A6S7CGE8|A0A6S7CGE8_9BURK_Uncharacterized_protein_OS=Achromobacter_anxifer_OX=1287737_GN=LMG26858_01506_PE=3_SV=1~~~tr|A0A0M7I492|A0A0M7I492_9BURK_Argininosuccinate_lyase_OS=Achromobacter_aegrifaciens_OX=1287736_GN=ERS370000_03009_PE=3_SV=1~~~tr|A0A7D4IQT0|A0A7D4IQT0_9BURK_Tripartite_tricarboxylate_transporter_substrate_binding_protein_OS=Achromobacter_pestifer_OX=1353889_GN=FOC84_30445_PE=3…
3	n22900	1	0	39	1	15	0	0	3.78127e-08	0.00047463	0.706187	6.25023	ATCCACGCTGGACGGGGTGTTGCTGGCGGGCGGCGGCGCCGTGTTCCTGGCTGAAACCCTGAGCGAGAAGTGGCCGCACACGATCCTGCTGGAGGAGCCT	100	tr|D4XHF6|D4XHF6_9BURK_ALP_N_domain-containing_protein_OS=Achromobacter_piechaudii_ATCC_43553_OX=742159_GN=HMPREF0004_4903_PE=4_SV=1~~~tr|A0A1N7P188|A0A1N7P188_9BURK_Plasmid_segregation_actin-type_ATPase_ParM_OS=Achromobacter_sp._MFA1_R4_OX=1881016_GN=SAMN05428937_0362_PE=4_SV=1
3	n22964	1	0	39	1	15	0	0	3.78127e-08	0.00047463	0.706187	6.25023	CGCGGCGGGCGTCGAAACCCTGCTGCCGGCCGACCGCGTGCTGATCGCGGTAGGACGGCGTCCGCGCACGCAGGACTGGGGGCTG	85	tr|A0A0M7ED97|A0A0M7ED97_9BURK_Rubredoxin-NAD(+)_reductase_OS=Achromobacter_aegrifaciens_OX=1287736_GN=rubB_1_PE=4_SV=1~~~tr|A0A7D4HUX4|A0A7D4HUX4_9BURK_NAD(P)/FAD-dependent_oxidoreductase_OS=Achromobacter_pestifer_OX=1353889_GN=FOC84_20325_PE=4_SV=1~~~tr|A0A446CY75|A0A446CY75_9BURK_Nitrite_reductase_[NAD(P)H]_OS=Achromobacter_agilis_OX=1353888_GN=nasD_2_PE=4_SV=1~~~tr|A0A6S7EYP8|A0A6S7EYP8_9BURK…
3	n23149	1	0	39	1	15	0	0	3.78127e-08	0.00047463	0.706187	6.25023	CGTGTCCAACTGGGGCAGCGTGGGCTTTGCCCGGATAGTAACGCCGGAGTCCTGGCTGTCGACCTGGTCGGGACTCTCGTCCAATGCCGCGCTGGAGCAGACCCTGCCGGCCGTGCGGCAGCCGACGCTGCTGATCGAGTACACCGGAGACCAATGCACGTTCCCGGCCGACATCGTCGCCATCCACGGCCAGATCGGTACACAGGCCAAGACCCATGTGCGGGTGCGCGGCAACCACCATGGCATGGCGCTGGCCAAGGACGAGCCCGCCGGCAGGACGGTAGCGGCCCAACACCTGGAAGCGTGGTTGCGCGCGCATTTCTGACCGGGCAATCCGTAGACACGCCCGCCACGGGCGCAAGAGGAACGATCAATGACGAGTCTGGAAAGGATCTTGCC…	1150	tr|A0A6S7DVA4|A0A6S7DVA4_9BURK_Uncharacterized_protein_OS=Achromobacter_anxifer_OX=1287737_GN=LMG26858_01575_PE=4_SV=1~~~tr|A0A658AEW0|A0A658AEW0_ALCXX_Alpha/beta_hydrolase_OS=Alcaligenes_xylosoxydans_xylosoxydans_OX=85698_GN=DAI43_05645_PE=4_SV=1~~~tr|A0A6S7F4I8|A0A6S7F4I8_9BURK_Uncharacterized_protein_OS=Achromobacter_insolitus_OX=217204_GN=LMG6000_00403_PE=4_SV=1~~~tr|A0A6S6YUC3|A0A6S6YUC3_9BU…
3	n23210	1	0	39	1	15	0	0	3.78127e-08	0.00047463	0.706187	6.25023	CAAGAACTCGTCCGATCGGTTGCGCCGCAGTTCTGGCAATTGATACGCGGATCGGGCGTTTCAAGCCTGTGAGGTCCTAGCCAGAGACCTGCCAGTCGCGAAACTGCTTGAACAAGCGAAACCCGACGTAGGTTTCGCTCCTGACCCAGCGCCGCCGGTAGTAGCAGTCCCAGTAGCTGGTCATGCGTTGCTGCGCGAGATCCAGAAAGGCCGGGTTGCGTCGAAGAACCGTTCCATAGGCGCGCTTGTCCAGCAAGGGCAAGCACGCCTCGA	273	tr|J4P971|J4P971_9BURK_Uncharacterized_protein_OS=Achromobacter_marplatensis_OX=470868_GN=QWC_16282_PE=4_SV=1~~~tr|A0A366FG88|A0A366FG88_9BURK_Uncharacterized_protein_OS=Achromobacter_marplatensis_OX=470868_GN=DFP87_1188_PE=4_SV=1~~~tr|A0A0M7JY37|A0A0M7JY37_9BURK_Uncharacterized_protein_OS=Achromobacter_aegrifaciens_OX=1287736_GN=ERS370000_03950_PE=4_SV=1~~~tr|E3HNP5|E3HNP5_ACHXA_Uncharacterized_…
3	n23308	1	0	39	1	15	0	0	3.78127e-08	0.00047463	0.706187	6.25023	GGATTCCATGGTGGAGGGTTCCGCCGCTGATTGTCCGGATCTGGGGCGGAGGCGCTGTTCAGTCGCCGGCGGGGTCAGCCGAAAGGCGAAAGCCCGCCGTCCTGGTTCAGGCTGAGCGGGATTTCGTCCCGCAGTATGTCGACTACCCGTGTGATGCGGGGGGAGAGAGGACGCTGGGCGGGCACCAGGGCATTCAGCGTGAAGGCCGGCACGATGTAGGCGGGCAGCAGCCGGATGAGCTTGCCCTGTTGCATCGCGTCCGCGCAAGCAGGCCTCTGCACCACGCCGATACCACTTCCGGCGGCGATCATCTCGTACATGGGACGCCAGTGGCTCGTCGTCACCGTGGTGCGTATCCGCACGTTCTCGATCGTGGCGTCGGGACTGCTCAAGGGTAGT…	4767	tr|A0A6S6YMY9|A0A6S6YMY9_9BURK_HTH-type_transcriptional_regulator_PgrR_OS=Achromobacter_pestifer_OX=1353889_GN=pgrR_1_PE=3_SV=1~~~tr|A0A4Q1HGW1|A0A4Q1HGW1_9BURK_LysR_family_transcriptional_regulator_OS=Achromobacter_aloeverae_OX=1750518_GN=C7R54_17650_PE=3_SV=1~~~tr|A0A6S7D683|A0A6S7D683_9BURK_HTH-type_transcriptional_regulator_DmlR_OS=Achromobacter_dolens_OX=1287738_GN=dmlR_19_PE=3_SV=1~~~tr|A0A…
3	n23326	1	0	39	1	15	0	0	3.78127e-08	0.00047463	0.706187	6.25023	GAGCCCGGAAATTGCGTGTTGTTGCCCACGACGGTTCCTTGGATGTTGGGTTCCAGCTCGGTTCTGAAGCGGATTCTGGTAAACCCGCATATCAAAACGCGCCTGGCTAGGGATTAAACCGGAATTATCCCCCATTGGCG	140	tr|A0A446CNB9|A0A446CNB9_9BURK_HTH-type_transcriptional_regulator_CysL_OS=Achromobacter_veterisilvae_OX=2069367_GN=cysL_4_PE=3_SV=1~~~tr|H0F2H2|H0F2H2_9BURK_LysR_family_transcriptional_regulator_OS=Achromobacter_arsenitoxydans_SY8_OX=477184_GN=KYC_04802_PE=3_SV=1~~~tr|A0A6S7CAV9|A0A6S7CAV9_9BURK_HTH-type_transcriptional_regulator_CynR_OS=Achromobacter_dolens_OX=1287738_GN=cynR_2_PE=3_SV=1~~~tr|A0…
3	n23505	1	0	39	1	15	0	0	3.78127e-08	0.00047463	0.706187	6.25023	CGGCAGCGTGGTGGAACGCTTTGAAGCGCAGGGTGAAACCCGCTTGCGGGTGGAGCTGCATGCGCGCAGCCAG	73	tr|A0A424W4Y4|A0A424W4Y4_ALCXX_Dehydratase_OS=Alcaligenes_xylosoxydans_xylosoxydans_OX=85698_GN=DY367_28240_PE=4_SV=1~~~tr|A0A0M9I3R6|A0A0M9I3R6_9BURK_(3R)-hydroxyacyl-ACP_dehydratase_subunit_HadB_OS=Achromobacter_aegrifaciens_OX=1287736_GN=ERS370000_00946_PE=4_SV=1~~~tr|A0A6S6YP88|A0A6S6YP88_9BURK_MaoC-like_domain-containing_protein_OS=Achromobacter_pestifer_OX=1353889_GN=LMG3431_01400_PE=4_SV=1…
3	n23551	1	0	39	1	15	0	0	3.78127e-08	0.00047463	0.706187	6.25023	TCCAGAAACCCGCGGAACTGGCTGGTCACCTGGTCGTCTTCGTCCCCATCGGGCCGATTGCG	62	tr|H0F603|H0F603_9BURK_Acetyl-coenzyme_A_synthetase_OS=Achromobacter_arsenitoxydans_SY8_OX=477184_GN=acsA_PE=3_SV=1~~~tr|A0A0M7F1H2|A0A0M7F1H2_9BURK_Uncharacterized_protein_conserved_in_bacteria_OS=Achromobacter_aegrifaciens_OX=1287736_GN=ERS370000_01494_PE=4_SV=1~~~tr|A0A658ADL8|A0A658ADL8_ALCXX_DotU_family_type_IV/VI_secretion_system_protein_OS=Alcaligenes_xylosoxydans_xylosoxydans_OX=85698_GN=…
3	n23634	1	0	39	1	15	0	0	3.78127e-08	0.00047463	0.706187	6.25023	GGCCAGCAGGTCCATGAAACCCGCGGCGCCGAACAATGGCCAGGACGCGGTGATGGACGAT	61	tr|A0A0M7DDL6|A0A0M7DDL6_ALCXX_Methyltranfer_dom_domain-containing_protein_OS=Alcaligenes_xylosoxydans_xylosoxydans_OX=85698_GN=ERS369984_00910_PE=4_SV=1~~~tr|A0A7X9ZF60|A0A7X9ZF60_9BURK_DUF1800_domain-containing_protein_OS=Achromobacter_sp._Bel_OX=2727415_GN=HG262_26955_PE=4_SV=1~~~tr|A0A8B5UXL0|A0A8B5UXL0_9BURK_Uncharacterized_protein_(DUF1800_family)_OS=Achromobacter_sp._SLBN-14_OX=2768442_GN=…
3	n24041	1	0	39	1	15	0	0	3.78127e-08	0.00047463	0.706187	6.25023	CATCTACTACGAAACCTATGGCGACGGCGCGCCCGTCCTGTTCATCCATGGCGGCGGCGGC	61	tr|E3HUI1|E3HUI1_ACHXA_Non-heme_chloroperoxidase_OS=Achromobacter_xylosoxidans_(strain_A8)_OX=762376_GN=cpo_PE=4_SV=1~~~tr|A0A6S7F9S6|A0A6S7F9S6_9BURK_Non-heme_chloroperoxidase_OS=Achromobacter_insolitus_OX=217204_GN=cpo_2_PE=4_SV=1~~~tr|A0A2S8VG97|A0A2S8VG97_9BURK_Alpha/beta_hydrolase_OS=Achromobacter_sp._MYb9_OX=1827284_GN=CQ050_08685_PE=4_SV=1~~~tr|A0A0X8BSU2|A0A0X8BSU2_9PSED_Arylesterase_OS=P…
3	n24048	1	0	39	1	15	0	0	3.78127e-08	0.00047463	0.706187	6.25023	CAAGCAGGCACACGGGTTGGCTAAGGGAAACCTAGCCGGCCTGCCGCAAGGTCAGCAGCGATGTTGGCAGCGGTTATTGCAAGGGTTGCAGCAAATT	97	tr|A0A811GPZ1|A0A811GPZ1_9BURK_Uncharacterized_protein_OS=Achromobacter_mucicolens_OX=1389922_GN=LMG3415_01071_PE=4_SV=1
3	n24083	1	0	39	1	15	0	0	3.78127e-08	0.00047463	0.706187	6.25023	CTGTTTCACCCATAAGGAGCGTCACCTTTGTACGAGACGCCTCAAACCTCAGCCCGACACTGTGACCAGATTAACCAGAATGCCCATTCTGGCAG	95	tr|D4XHE5|D4XHE5_9BURK_Diguanylate_cyclase_(GGDEF)_domain_protein_OS=Achromobacter_piechaudii_ATCC_43553_OX=742159_GN=HMPREF0004_4892_PE=4_SV=1~~~tr|A0A1R1JZN6|A0A1R1JZN6_ALCXX_LysR_family_transcriptional_regulator_OS=Alcaligenes_xylosoxydans_xylosoxydans_OX=85698_GN=BIZ92_08305_PE=3_SV=1~~~tr|A0A6S7ER21|A0A6S7ER21_9BURK_Protein_FecR_OS=Achromobacter_ruhlandii_OX=72557_GN=fecR_12_PE=4_SV=1~~~tr|A…
3	n24106	1	0	39	1	15	0	0	3.78127e-08	0.00047463	0.706187	6.25023	GCTGGCGCGCGAATGCGGCGGCTTCGAAACCTCCAGTACCCGCCCGCTGATGCGCGCGCAG	61	tr|A0A2S5GKM5|A0A2S5GKM5_9BURK_3-hydroxy-3-methylglutaryl_coenzyme_A_reductase_OS=Achromobacter_spanius_OX=217203_GN=C4E15_24570_PE=3_SV=1~~~tr|A0A3S5E5H0|A0A3S5E5H0_9BURK_3-hydroxy-3-methylglutaryl_coenzyme_A_reductase_OS=Achromobacter_spanius_OX=217203_GN=mvaA_PE=3_SV=1~~~tr|A0A7Y4K2Y5|A0A7Y4K2Y5_9BURK_3-hydroxy-3-methylglutaryl_coenzyme_A_reductase_OS=Achromobacter_deleyi_OX=1353891_GN=HLG70_0…
3	n24135	1	0	39	1	15	0	0	3.78127e-08	0.00047463	0.706187	6.25023	GGTGTACGGCATGCAATCGAACGGCGGCGGCCGAATTGCGTTTTCGCCTGGCGATGCCGCAGCGCACCAGGCTCGGTGCCTGTAAAGCACCGAGCCTGGCTAGCCAAAGCCGCTGGCGGCAAACCTCTCAATGGCCTCGGGGCGGCTTACAGCCCCATCGCCGGGTCCGTCA	172	tr|A0A6S7D772|A0A6S7D772_9BURK_Uncharacterized_protein_OS=Achromobacter_pulmonis_OX=1389932_GN=LMG26788_02977_PE=4_SV=1~~~tr|A0A6S6ZHM9|A0A6S6ZHM9_9BURK_Uncharacterized_protein_OS=Achromobacter_deleyi_OX=1353891_GN=LMG3458_01596_PE=4_SV=1~~~tr|A0A5K6EGA6|A0A5K6EGA6_ALCXX_Serine/threonine_protein_kinase_OS=Alcaligenes_xylosoxydans_xylosoxydans_OX=85698_GN=AL520_06635_PE=4_SV=1~~~tr|A0A173DTC0|A0A1…
3	n24304	1	0	39	1	15	0	0	3.78127e-08	0.00047463	0.706187	6.25023	GCTGTATGCCTACGCGCAGGAAACCTTCGGATCGCTGCGCGCGGCCGAACGCAGCCTGAGC	61	tr|E3HVC8|E3HVC8_ACHXA_Bacterial_regulatory_helix-turn-helix_protein,_LysR_family_protein_173_OS=Achromobacter_xylosoxidans_(strain_A8)_OX=762376_GN=AXYL_05401_PE=3_SV=1~~~tr|A0A424WC98|A0A424WC98_ALCXX_LysR_family_transcriptional_regulator_OS=Alcaligenes_xylosoxydans_xylosoxydans_OX=85698_GN=DY367_15555_PE=3_SV=1~~~tr|A0A7D4DYV6|A0A7D4DYV6_9BURK_LysR_family_transcriptional_regulator_OS=Achromoba…
3	n24322	1	0	39	1	15	0	0	3.78127e-08	0.00047463	0.706187	6.25023	AAGGAGCATATCCGTGAGCTTGAGCTTTGCGTTTTCCAGTGAACACGAAGCCGTCCGCGATACCGTGCGGCGGCTTTGCCAGGATGAACTCGCCCCCCTGGTCTTCGATGCTGAAGAACAGGAAACCTTTCCGAAGCACGTCTTTGAACGCTGGGGCGATCTGGGCCTGCTGGGCGTGCGTTATCCGGAAGCCGATGGCGGCAGCGGCCTG	211	tr|A0A0M7LUV8|A0A0M7LUV8_9BURK_Acyl-CoA_dehydrogenase,_short-chain_specific_OS=Achromobacter_aegrifaciens_OX=1287736_GN=ERS370000_05253_PE=3_SV=1~~~tr|A0A6S7CF58|A0A6S7CF58_9BURK_Acyl-CoA_dehydrogenase_OS=Achromobacter_anxifer_OX=1287737_GN=acdA_2_PE=3_SV=1~~~tr|A0A8B5V2M4|A0A8B5V2M4_9BURK_Uncharacterized_protein_OS=Achromobacter_sp._SLBN-14_OX=2768442_GN=FBY20_5293_PE=4_SV=1~~~tr|A0A854PYL6|A0A8…
3	n24381	1	0	39	1	15	0	0	3.78127e-08	0.00047463	0.706187	6.25023	TTCGATCAGCGGATAGTCCTTGTGCGGCCAAACCTTGGTCAGGTCGAAGGGGTTGAGATGA	61	tr|J4Y679|J4Y679_9BURK_Catalase_OS=Achromobacter_marplatensis_OX=470868_GN=QWC_31031_PE=3_SV=1~~~tr|A0A7X9VZ44|A0A7X9VZ44_9BURK_Catalase_OS=Achromobacter_sp._Bel_OX=2727415_GN=HG262_06190_PE=3_SV=1~~~tr|A0A366G4W4|A0A366G4W4_9BURK_Catalase_OS=Achromobacter_marplatensis_OX=470868_GN=DFP87_103603_PE=3_SV=1~~~tr|A0A2S8VIR4|A0A2S8VIR4_9BURK_Catalase_OS=Achromobacter_sp._MYb9_OX=1827284_GN=CQ050_04490…
3	n24424	1	0	39	1	15	0	0	3.78127e-08	0.00047463	0.706187	6.25023	AACGATAGCCGGCGCGCCGCAGGAATCCTATGGTGACGATCGCGTGTTCGACGTGCAGGGCTGCCTGGTCACCGCGACGATCCAGTCGGGCAAGGTATCGGCATTGAGCATGGAACCCTCTGAAACCTGCAAGCCCGACCTTGCCAGCTTCATAGGCGAATATGCGCCCAAGCAGGGGCAGAAACTCACCCCCGCCGCCTTCGACTCGAACCTGGCTTATACGGCAGATTGCCTGACCGACTGCGGCAACGCCGCCGATCCCTGGGTGTACGCAACCTGGACCGCGCCTCGCGCAGCCGGTGGCATGGAAATCATGCTGGGCTTTGTACAG	331	tr|A0A6S7AIP5|A0A6S7AIP5_9BURK_Quercetin_2,3-dioxygenase_OS=Achromobacter_deleyi_OX=1353891_GN=yhhW_2_PE=3_SV=1~~~tr|A0A0M7DP08|A0A0M7DP08_ALCXX_Quercetin_2,3-dioxygenase_OS=Alcaligenes_xylosoxydans_xylosoxydans_OX=85698_GN=yhhW_2_PE=3_SV=1~~~tr|A0A6S7DLI8|A0A6S7DLI8_9BURK_Quercetin_2,3-dioxygenase_OS=Achromobacter_dolens_OX=1287738_GN=yhhW_2_PE=3_SV=1~~~tr|A0A0X8PI92|A0A0X8PI92_ALCXX_Pirin_famil…
3	n24556	1	0	39	1	15	0	0	3.78127e-08	0.00047463	0.706187	6.25023	CTGCGCCAGGACACCTCCGCCTTCGCCCGCGCGCTGGCCGAAACCTGCGCGCGCGCCGGCCTGCCCCTGTCCGCCGCCCAAACCGTCGCCGAAGTCCCGGCCCAGCTGGCTCTG	114	tr|A0A2I8DFC7|A0A2I8DFC7_9BURK_LysR_family_transcriptional_regulator_OS=Achromobacter_sp._AONIH1_OX=1758194_GN=C2U31_06805_PE=3_SV=1~~~tr|A0A424WII7|A0A424WII7_ALCXX_NAD-dependent_succinate-semialdehyde_dehydrogenase_OS=Alcaligenes_xylosoxydans_xylosoxydans_OX=85698_GN=DY367_04115_PE=4_SV=1~~~tr|A0A446CRQ2|A0A446CRQ2_9BURK_HTH-type_transcriptional_regulator_GltC_OS=Achromobacter_agilis_OX=1353888…
3	n24605	1	0	39	1	15	0	0	3.78127e-08	0.00047463	0.706187	6.25023	GACATTCTGTTAGGCGTCGATTGCTAAACCTGGAAAAGCGGGGCTAGGATGTAGCAAAATA	61	tr|A0A6S6ZP16|A0A6S6ZP16_9BURK_Uncharacterized_protein_OS=Achromobacter_pestifer_OX=1353889_GN=LMG3431_03110_PE=4_SV=1~~~tr|A0A6S7CE96|A0A6S7CE96_9BURK_Thiosulfate_sulfurtransferase_GlpE_OS=Achromobacter_piechaudii_OX=72556_GN=glpE_2_PE=4_SV=1
3	n24673	1	0	39	1	15	0	0	3.78127e-08	0.00047463	0.706187	6.25023	CGCGGCGGCCCTGGCGCAGCAGGATAGCGAGTTCATCCTGGCCGCGCGCGGCCTGCCCTGCGCCCTCTGGCTGCAGGCCGGCGCCGCGGCGCAAGAGCGTGTAACCGCCTGGGCCGGCCAGCCCACCGCACCGTCGCAATGCATCACCATCAGCGCGCCGCCGGAAACCTGGCGCAAGCTACTCAGCGACACCCCGCCTCCGGGCTACCACTCCTTCACCGCTGCCCGCCGCCAGGCCCAAGGCCTGCGAGTCACGGGCGATGCGCTGGCCATCGCCCAGGCCCTGCACCCGCTGGAGCGGCTTTTCGAAATCCTCCGGGGCCAGCTTGACGCCACGCCGGACCTGCTCGACCGCAGCGCGATTGCCGGCTCCTATGCGACCATTGATATCGGCGCGGC…	553	tr|D4XGZ1|D4XGZ1_9BURK_Hydrolase,_alpha/beta_domain_protein_OS=Achromobacter_piechaudii_ATCC_43553_OX=742159_GN=HMPREF0004_4738_PE=4_SV=1~~~tr|A0A6S7E3I9|A0A6S7E3I9_9BURK_2-succinyl-6-hydroxy-2,_4-cyclohexadiene-1-carboxylate_synthase_OS=Achromobacter_piechaudii_OX=72556_GN=menH_6_PE=4_SV=1~~~tr|A0A446CUM4|A0A446CUM4_9BURK_2-succinyl-6-hydroxy-2,_4-cyclohexadiene-1-carboxylate_synthase_OS=Achromo…
3	n24722	1	0	39	1	15	0	0	3.78127e-08	0.00047463	0.706187	6.25023	GGAAACCGAAATAGGCGGCCTGGCCGTGTACGAAACCGCCGTGTCCTGCGCGGTGAACGAG	61	tr|A0A366GAI4|A0A366GAI4_9BURK_Uncharacterized_protein_OS=Achromobacter_marplatensis_OX=470868_GN=DFP87_101376_PE=4_SV=1~~~tr|J4YZJ8|J4YZJ8_9BURK_Uncharacterized_protein_OS=Achromobacter_marplatensis_OX=470868_GN=QWC_06574_PE=4_SV=1~~~tr|A0A7X9ZBE5|A0A7X9ZBE5_9BURK_Uncharacterized_protein_OS=Achromobacter_sp._Bel_OX=2727415_GN=HG262_06900_PE=4_SV=1~~~tr|A0A2S8VD98|A0A2S8VD98_9BURK_Uncharacterized…
3	n24882	1	0	39	1	15	0	0	3.78127e-08	0.00047463	0.706187	6.25023	CGATCACCGAGCAGGACCTCGAACACTGATACGCGGTTCCCCGGGGCGGCAGCCAGGATTGGCAGCCGTCCACGGCAGGCAGTCGAAACCGACCTGCCCACCAAGAAATAGAACATTCCAAGGAGACAACCATCATGCACGCACGATTTCTGCGCGCCTGCCTCGCGTCGTTGACGTTTTCGCTTGCCGCTCAGGCCCAGGCTGCAACGGACTGGCCTGAGCGCCCCATCACGCTGGTCGTGCCGTTCGGC	251	tr|A0A2S5GK15|A0A2S5GK15_9BURK_ABC_transporter_substrate-binding_protein_OS=Achromobacter_spanius_OX=217203_GN=C4E15_25670_PE=3_SV=1~~~tr|A0A095UT94|A0A095UT94_9BURK_ABC_transporter_substrate-binding_protein_OS=Achromobacter_sp._RTa_OX=1532557_GN=JL37_16060_PE=3_SV=1~~~tr|A0A8B5UWR0|A0A8B5UWR0_9BURK_Tripartite-type_tricarboxylate_transporter_receptor_subunit_TctC_OS=Achromobacter_sp._SLBN-14_OX=2…
3	n25030	1	0	39	1	15	0	0	3.78127e-08	0.00047463	0.706187	6.25023	CCGCGACCATGTCGAAACCGATCGCTGGGGTGTGGCGCCCTCATTCTCCTGGGGCCTGGGC	61	tr|A0A446C6V4|A0A446C6V4_9BURK_Ferrichrome-iron_receptor_OS=Achromobacter_veterisilvae_OX=2069367_GN=fhuA_2_PE=3_SV=1~~~tr|A0A7T4B0E2|A0A7T4B0E2_9BURK_TonB-dependent_siderophore_receptor_OS=Achromobacter_deleyi_OX=1353891_GN=I6I07_22215_PE=4_SV=1~~~tr|F7T8Q8|F7T8Q8_9BURK_TonB-dependent_siderophore_receptor_OS=Achromobacter_insuavis_AXX-A_OX=1003200_GN=AXXA_26770_PE=3_SV=1~~~tr|A0A6S7A5V1|A0A6S7A5…
3	n25143	1	0	39	1	15	0	0	3.78127e-08	0.00047463	0.706187	6.25023	TCAGCCTGGTCCGGCCCGCCGCAAACCGAGAGAAACATACAGGTGCCCGGCCAGCCCGCCT	61	tr|A0A7D4I3V3|A0A7D4I3V3_9BURK_Histidine_kinase_OS=Achromobacter_pestifer_OX=1353889_GN=FOC84_29140_PE=4_SV=1~~~tr|A0A658AB09|A0A658AB09_ALCXX_Short-chain_dehydrogenase_OS=Alcaligenes_xylosoxydans_xylosoxydans_OX=85698_GN=DAI43_21510_PE=4_SV=1~~~tr|A0A0M7DSH8|A0A0M7DSH8_9BURK_Short_chain_dehydrogenase_OS=Achromobacter_aegrifaciens_OX=1287736_GN=ERS370000_00976_PE=4_SV=1~~~tr|A0A0M7E9J1|A0A0M7E9J1…
3	n25217	1	0	39	1	15	0	0	3.78127e-08	0.00047463	0.706187	6.25023	GCCGTGGGCCAGTTCCGGTGTATCGAGAAACCGAGGCCGCTGCGCCTCGAAGGCGATGTAGCCC	64	tr|A0A2I8DBD2|A0A2I8DBD2_9BURK_ATP-dependent_zinc_metalloprotease_FtsH_OS=Achromobacter_sp._AONIH1_OX=1758194_GN=ftsH_PE=3_SV=1~~~tr|A0A2M9H3J7|A0A2M9H3J7_9BURK_ATP-dependent_zinc_metalloprotease_FtsH_OS=Achromobacter_ruhlandii_OX=72557_GN=ftsH4_PE=3_SV=1~~~tr|D4XHE2|D4XHE2_9BURK_ATP-dependent_zinc_metalloprotease_FtsH_OS=Achromobacter_piechaudii_ATCC_43553_OX=742159_GN=ftsH_PE=3_SV=1~~~tr|A0A1N7…
3	n25326	1	0	39	1	15	0	0	3.78127e-08	0.00047463	0.706187	6.25023	GTGCACGGCGGCCCGGAAACCGCCAACGGCCTGTGCGAACACCCCGAC	48	tr|A0A366G448|A0A366G448_9BURK_Pectate_lyase_OS=Achromobacter_marplatensis_OX=470868_GN=DFP87_103874_PE=3_SV=1~~~tr|A0A848NLS0|A0A848NLS0_9BURK_CoA-acylating_methylmalonate-semialdehyde_dehydrogenase_(Fragment)_OS=Achromobacter_ruhlandii_OX=72557_GN=mmsA_PE=4_SV=1~~~tr|A0A0Q8BKH6|A0A0Q8BKH6_9BURK_Methylmalonate-semialdehyde_dehydrogenase_OS=Achromobacter_sp._Root565_OX=1736564_GN=ASD71_18635_PE=4…
3	n25357	1	0	39	1	15	0	0	3.78127e-08	0.00047463	0.706187	6.25023	ACACGCTCCAATTACGGACAGCACGGAAACTCAAGTTCCGCGACCAAACCGCCACCTTCCCGGGGCTTGAGATGCAATGCTCCCCCG	87	tr|A0A6S7EEX6|A0A6S7EEX6_9BURK_Putative_ABC_transporter_ATP-binding_protein_YejF_OS=Achromobacter_dolens_OX=1287738_GN=yejF_2_PE=4_SV=1~~~tr|A0A5K4YCS7|A0A5K4YCS7_ALCXX_ABC_transporter_ATP-binding_protein_OS=Alcaligenes_xylosoxydans_xylosoxydans_OX=85698_GN=AL520_25730_PE=4_SV=1~~~tr|A0A2M9GY30|A0A2M9GY30_9BURK_Putative_ABC_transporter_ATP-binding_protein_YejF_OS=Achromobacter_ruhlandii_OX=72557_…
3	n25395	1	0	39	1	15	0	0	3.78127e-08	0.00047463	0.706187	6.25023	CGTCAACGTCGAAACCGCCACGCCCGAACAAGTCGCCGTCCTGGAAGAAAGCCAC	55	tr|A0A6S7CEM5|A0A6S7CEM5_9BURK_Uncharacterized_protein_OS=Achromobacter_dolens_OX=1287738_GN=LMG26841_01594_PE=4_SV=1~~~tr|A0A7Y4NKA1|A0A7Y4NKA1_9BURK_CMD_domain_protein_OS=Achromobacter_deleyi_OX=1353891_GN=HLG70_11245_PE=4_SV=1~~~tr|A0A6S7DR58|A0A6S7DR58_9BURK_CMD_domain-containing_protein_OS=Achromobacter_piechaudii_OX=72556_GN=LMG1861_03134_PE=4_SV=1~~~tr|D4XEM1|D4XEM1_9BURK_Peroxidase-like_p…
3	n25446	1	0	39	1	15	0	0	3.78127e-08	0.00047463	0.706187	6.25023	GCCGAAACCGCCATCGCCACGGCAGAACACAGTCTGCTGCAGGGTGGCCAGCAAGGCGCCGTCCGCGGCATCGAACAGTTCACGCT	86	tr|J4YZR3|J4YZR3_9BURK_Acyl_dehydratase_OS=Achromobacter_marplatensis_OX=470868_GN=QWC_06774_PE=4_SV=1~~~tr|A0A366GA81|A0A366GA81_9BURK_Acyl_dehydratase_OS=Achromobacter_marplatensis_OX=470868_GN=DFP87_101343_PE=4_SV=1~~~tr|A0A6S7CFX5|A0A6S7CFX5_9BURK_Uncharacterized_protein_OS=Achromobacter_anxifer_OX=1287737_GN=LMG26858_01472_PE=4_SV=1~~~tr|A0A7D4IEA6|A0A7D4IEA6_9BURK_MaoC_family_dehydratase_N-…
3	n25624	1	0	39	1	15	0	0	3.78127e-08	0.00047463	0.706187	6.25023	CGATATGCCGAAGGCGTCGGCGTTCAGGCCCGTCAGATGGCGGGCCGCGTCGAAGTCCTCGCTGTAGAACCAGAGGTCATTGGCGTAGACATTGAAACCGCCTTGCGAATAGATCCAGGCTGCGTCGCGCCGGGCTTGCAGCGTGGCGGCGGGGCCCATCAATCCGCGCACGTAGGCGGGGTTGTGCGCGGCCTGGTTGACCTGAGGATGGCACAGCATCGGGGTGCGGCGTCCGGCCGCTTGGTACGGCGCCTCCAGCGCGACGACGCCTGCCACGTCGGCTGGGCTGCGCGCCGCCACCACCAGCGCCATTGCCGCGCCCATCGAGCAACCCAGCAGGGCCGCCGGTCCACCCGCGACCTGGCGAATCACCGCCAGGCAGGTCTGCAGATAGGCATC…	487	tr|A0A0X8BSU2|A0A0X8BSU2_9PSED_Arylesterase_OS=Pseudomonas_monteilii_OX=76759_GN=APT63_00505_PE=4_SV=1~~~tr|A0A8B5UZY0|A0A8B5UZY0_9BURK_Pimeloyl-ACP_methyl_ester_carboxylesterase_OS=Achromobacter_sp._SLBN-14_OX=2768442_GN=FBY20_4372_PE=4_SV=1~~~tr|A0A811GQW1|A0A811GQW1_9BURK_Uncharacterized_protein_OS=Achromobacter_mucicolens_OX=1389922_GN=LMG3415_01820_PE=4_SV=1~~~tr|A0A446D0X6|A0A446D0X6_9BURK_…
3	n25802	1	0	39	1	15	0	0	3.78127e-08	0.00047463	0.706187	6.25023	GGGCGAAGCGGCGGAACTGGCAGCCTCGGATGAGGTGCGAAAGGCGTATCTGGGGATGTGAGGACGGGGGTGTGACGAAACCGCGCCGGACGCGCAAGGCGTCCGGCGCGGACTGCCATCAGAAGAT	127	tr|A0A6S7AED3|A0A6S7AED3_9BURK_High-affinity_branched-chain_amino_acid_transport_ATP-binding_protein_LivF_OS=Achromobacter_deleyi_OX=1353891_GN=livF_23_PE=4_SV=1~~~tr|A0A1R1JRM2|A0A1R1JRM2_ALCXX_ABC_transporter_ATP-binding_protein_OS=Alcaligenes_xylosoxydans_xylosoxydans_OX=85698_GN=BIZ92_28885_PE=4_SV=1~~~tr|F7T735|F7T735_9BURK_ABC_transporter_family_protein_51_OS=Achromobacter_insuavis_AXX-A_OX…
3	n25891	1	0	39	1	15	0	0	3.78127e-08	0.00047463	0.706187	6.25023	GCGCTGGAAGGACGAAACCGCGTCGGCGCCGGCCTGAGCCGCCGGTCGGGCATCCCTAGGGGATTGCCCTAATCC	75	tr|A0A0L8EU61|A0A0L8EU61_9BURK_Uncharacterized_protein_OS=Achromobacter_sp._DMS1_OX=1688405_GN=AD428_00470_PE=4_SV=1
3	n25902	1	0	39	1	15	0	0	3.78127e-08	0.00047463	0.706187	6.25023	GAAGTCCTGGCGCTGGGCGGCAGCCTGGAAACCGCGGACGTGTTCGGCATGGAGGGCGAGGCCCACGTCGCACTGGACGAGGAGAT	86	tr|A0A6S7F2Q4|A0A6S7F2Q4_9BURK_Uncharacterized_protein_OS=Achromobacter_insolitus_OX=217204_GN=LMG6000_03348_PE=4_SV=1~~~tr|A0A0Q8BKS3|A0A0Q8BKS3_9BURK_Hydroxyacylglutathione_hydrolase_OS=Achromobacter_sp._Root565_OX=1736564_GN=ASD71_11380_PE=4_SV=1~~~tr|A0A446CUK3|A0A446CUK3_9BURK_NAD_binding_9_domain-containing_protein_OS=Achromobacter_agilis_OX=1353888_GN=AGI3411_05186_PE=4_SV=1~~~tr|A0A446CXH…
3	n25983	1	0	39	1	15	0	0	3.78127e-08	0.00047463	0.706187	6.25023	CCTGGCGCAACGGCACGATGCCGAAACCGCGGCGTTCATTGCCCACGCCCGCGCCGCTATTGAAGGACTGGCCGGCAGCCGATAAC	86	tr|A0A658A9R6|A0A658A9R6_ALCXX_ANT(3\'\')_family_aminoglycoside_nucleotidyltransferase_OS=Alcaligenes_xylosoxydans_xylosoxydans_OX=85698_GN=DAI43_16475_PE=4_SV=1~~~tr|A0A0M7JZF0|A0A0M7JZF0_9BURK_Streptomycin_3\'\'-adenylyltransferase_OS=Achromobacter_aegrifaciens_OX=1287736_GN=ant1_PE=4_SV=1~~~tr|A0A8B5V0F8|A0A8B5V0F8_9BURK_Nitrous_oxide_reductase_apoprotein_OS=Achromobacter_sp._SLBN-14_OX=276844…
3	n26125	1	0	39	1	15	0	0	3.78127e-08	0.00047463	0.706187	6.25023	TTCAAACCGTCGATTGGTACAAGGCGCATGGCCCCGAACGCAACGCGATGATCGCGAAATG	61	tr|A0A7Y4K6G6|A0A7Y4K6G6_9BURK_EexN_family_lipoprotein_OS=Achromobacter_deleyi_OX=1353891_GN=HLG70_07080_PE=4_SV=1~~~tr|A0A193PMH4|A0A193PMH4_ALCXX_IncQ_plasmid_conjugative_transfer_protein_TraG_OS=Alcaligenes_xylosoxydans_xylosoxydans_OX=85698_GN=traG_PE=4_SV=1~~~tr|A0A095UNI5|A0A095UNI5_9BURK_Conjugal_transfer_protein_TraG_OS=Achromobacter_sp._RTa_OX=1532557_GN=JL37_21415_PE=4_SV=1~~~tr|A0A2N8K…
3	n26207	1	0	39	1	15	0	0	3.78127e-08	0.00047463	0.706187	6.25023	CCGATGAAACCGTTGCCCCCCTCTCCCCCACCCGATGGCCGCCGCTTGCGCGGCGAGCGCG	61
3	n26214	1	0	39	1	15	0	0	3.78127e-08	0.00047463	0.706187	6.25023	CCGGAAACCGTTGCCGCAGCGCGAACGCCACCGCGATGGCGGCAATTCCGCCTGCCGACAA	61	tr|A0A6S7ASJ6|A0A6S7ASJ6_9BURK_Uncharacterized_protein_OS=Achromobacter_kerstersii_OX=1353890_GN=LMG3441_05915_PE=4_SV=1
3	n26470	1	0	39	1	15	0	0	3.78127e-08	0.00047463	0.706187	6.25023	GGGCCTGCATCTGGTCATCGGCGAAACCGGACAGTTCGCGCTATCGCACGCCGCCTTCTAC	61	tr|A0A4Q1HQH2|A0A4Q1HQH2_9BURK_ABC_transporter_OS=Achromobacter_aloeverae_OX=1750518_GN=C7R54_02495_PE=4_SV=1~~~tr|A0A6S7CDB7|A0A6S7CDB7_9BURK_Vitamin_B12_import_ATP-binding_protein_BtuD_OS=Achromobacter_piechaudii_OX=72556_GN=btuD_6_PE=4_SV=1~~~tr|A0A2S5GWN0|A0A2S5GWN0_9BURK_ABC_transporter_OS=Achromobacter_spanius_OX=217203_GN=C4E15_05005_PE=4_SV=1~~~tr|A0A811GNQ9|A0A811GNQ9_9BURK_Vitamin_B12_i…
3	n26490	1	0	39	1	15	0	0	3.78127e-08	0.00047463	0.706187	6.25023	CAGCGCCGCGCGGCGCACGTTGCCGCCCCCAGCCTGGACGCCGACACCGCCCGCGCCGCGCCCAAACCGGATACCGCCCATTCCAGCCGTCAGCAGGCCCCCGCCCGC	108	tr|A0A6S7CJ87|A0A6S7CJ87_9BURK_Uncharacterized_protein_OS=Achromobacter_anxifer_OX=1287737_GN=LMG26858_01708_PE=4_SV=1~~~tr|E3HQ42|E3HQ42_ACHXA_Inner-membrane_translocator_53_OS=Achromobacter_xylosoxidans_(strain_A8)_OX=762376_GN=AXYL_05039_PE=4_SV=1~~~tr|A0A7D4I0M9|A0A7D4I0M9_9BURK_Branched-chain_amino_acid_ABC_transporter_permease_OS=Achromobacter_pestifer_OX=1353889_GN=FOC84_20790_PE=4_SV=1~~~…
3	n26649	1	0	39	1	15	0	0	3.78127e-08	0.00047463	0.706187	6.25023	TCGGTCGGCATGGGCGGGATTTTGGCATAGCCCGGGCCGCGGGCCGGGGTGAGCCGACCCGTCTTGCTTCAAACCGGCCACCCATCCTGCCGATACGCCGAATCCCAGAACATCCATTC	119	tr|A0A6S6ZFK0|A0A6S6ZFK0_9BURK_DUF4347_domain-containing_protein_OS=Achromobacter_kerstersii_OX=1353890_GN=LMG3441_01344_PE=4_SV=1~~~tr|A0A6S7CD24|A0A6S7CD24_9BURK_DUF4347_domain-containing_protein_OS=Achromobacter_anxifer_OX=1287737_GN=LMG26858_01278_PE=4_SV=1~~~tr|A0A6S7EKA7|A0A6S7EKA7_9BURK_Aminopyrimidine_aminohydrolase_OS=Achromobacter_dolens_OX=1287738_GN=tenA_PE=3_SV=1~~~tr|A0A6S7B0Y9|A0A6…
3	n26683	1	0	39	1	15	0	0	3.78127e-08	0.00047463	0.706187	6.25023	CTGCTCAAACCGGCCACGCTGATCGCGGCCGCCGTCCTGTCGCTGCCCGCCGCAACCGTCT	61	tr|A0A7X9W3R9|A0A7X9W3R9_9BURK_Amidase_OS=Achromobacter_sp._Bel_OX=2727415_GN=HG262_19805_PE=4_SV=1~~~tr|A0A366G419|A0A366G419_9BURK_Aspartyl-tRNA(Asn)/glutamyl-tRNA(Gln)_amidotransferase_subunit_A_OS=Achromobacter_marplatensis_OX=470868_GN=DFP87_103383_PE=4_SV=1~~~tr|J4YQZ7|J4YQZ7_9BURK_Amidase_OS=Achromobacter_marplatensis_OX=470868_GN=QWC_14402_PE=4_SV=1~~~tr|A0A6S7F1U2|A0A6S7F1U2_9BURK_Glutam…
3	n26753	1	0	39	1	15	0	0	3.78127e-08	0.00047463	0.706187	6.25023	GCGCATCGACGAGGTGCACGGCGAGGTCAAACCGGCCGACAAGCTGGCGCTGGTGGAAAAA	61	tr|A0A6S7F653|A0A6S7F653_9BURK_Copper-exporting_P-type_ATPase_OS=Achromobacter_insolitus_OX=217204_GN=copA_5_PE=3_SV=1~~~tr|E3HKH7|E3HKH7_ACHXA_Copper-translocating_P-type_ATPase_4_OS=Achromobacter_xylosoxidans_(strain_A8)_OX=762376_GN=AXYL_05971_PE=3_SV=1~~~tr|A0A0M7LIQ4|A0A0M7LIQ4_9BURK_Copper-transporting_P-type_ATPase_OS=Achromobacter_aegrifaciens_OX=1287736_GN=actP_4_PE=3_SV=1~~~tr|A0A7D4DXE…
3	n26808	1	0	39	1	15	0	0	3.78127e-08	0.00047463	0.706187	6.25023	GGCAGGTGCGGCCCTTCAGCGCGGAAGACGCGCAGGACGCCCAGAATACGCTCGAAGCCGCGATGGCATTGGAGGAGGGCGGCTTTGACTCCATCGAGCCGGTGTGGCGGGCCAAGGGCGCCGCGCTGGGCAGGCAGGCGCAGGACAAGGCGGCCATCTATGTACTGGACGTGCCCGAATTCAAGGGTTTGCTGGATGCCGCCCGCGGCAGCGCGGGCTATTCCACGCAGCCCGCCGGAAACGGCTATCTGTGCATCTTGGGCAATCCTGGGCTGCGGTTCGAGCGCAAGGAACTGGGCTTTAAACCGGCCGTCTGGTATGGCGCCTTGACCGGCGGGTTGAGCGGCCGTATCGAACAGTTCGACATGGACGTCCTGTCCATTGCACCTCTGGAGCTCG…	626	tr|A0A658AER9|A0A658AER9_ALCXX_Glyoxalase_OS=Alcaligenes_xylosoxydans_xylosoxydans_OX=85698_GN=DAI43_05635_PE=4_SV=1~~~tr|A0A6S7EZG7|A0A6S7EZG7_9BURK_VOC_domain-containing_protein_OS=Achromobacter_insolitus_OX=217204_GN=LMG6000_00405_PE=4_SV=1~~~tr|A0A6S7CR85|A0A6S7CR85_9BURK_VOC_domain-containing_protein_OS=Achromobacter_anxifer_OX=1287737_GN=LMG26858_01577_PE=4_SV=1~~~tr|A0A6S6ZXB6|A0A6S6ZXB6_9…
3	n26835	1	0	39	1	15	0	0	3.78127e-08	0.00047463	0.706187	6.25023	GAAAGTGATCGAAACCGGCCGGCAGCTCGGTCAGGGGCTGGCCCTGGCCGTCCAGCACGGACAGG	65	tr|A0A0M7F608|A0A0M7F608_9BURK_Thiamine-monophosphate_kinase_OS=Achromobacter_aegrifaciens_OX=1287736_GN=thiL_PE=3_SV=1~~~tr|A0A7D4HUC4|A0A7D4HUC4_9BURK_Thiamine-monophosphate_kinase_OS=Achromobacter_pestifer_OX=1353889_GN=thiL_PE=3_SV=1~~~tr|F7SX24|F7SX24_9BURK_Thiamine-monophosphate_kinase_OS=Achromobacter_insuavis_AXX-A_OX=1003200_GN=thiL_PE=3_SV=1~~~tr|A0A095VV39|A0A095VV39_9BURK_Thiamine-mon…
3	n26910	1	0	39	1	15	0	0	3.78127e-08	0.00047463	0.706187	6.25023	GCTACTCGTTCAACGCTGACGACAACAACGCTGATCAAACCGGCTGGCGCACGGCTGACAACACCCGCGCCATCACGACCGGT	83	tr|A0A0Q8XBX3|A0A0Q8XBX3_9BURK_Porin_OS=Achromobacter_sp._Root83_OX=1736602_GN=ASE30_26310_PE=4_SV=1~~~tr|A0A3C1XV60|A0A3C1XV60_9BURK_Porin_OS=Achromobacter_sp._OX=134375_GN=DCR74_04700_PE=4_SV=1~~~tr|A0A6S6ZKR6|A0A6S6ZKR6_9BURK_Outer_membrane_porin_protein_OS=Achromobacter_animicus_OX=1389935_GN=LMG26690_01801_PE=4_SV=1~~~tr|A0A1N7PGE7|A0A1N7PGE7_9BURK_Outer_membrane_protein_(Porin)_OS=Achromoba…
3	n26943	1	0	39	1	15	0	0	3.78127e-08	0.00047463	0.706187	6.25023	TGAAACCGGCGATCAGGATCGCCACCATCGACAGCGTG	38	tr|A0A7X9ZFD3|A0A7X9ZFD3_9BURK_MdtB/MuxB_family_multidrug_efflux_RND_transporter_permease_subunit_OS=Achromobacter_sp._Bel_OX=2727415_GN=HG262_18315_PE=4_SV=1~~~tr|A0A6S7EH93|A0A6S7EH93_9BURK_Multidrug_resistance_protein_MdtB_OS=Achromobacter_anxifer_OX=1287737_GN=mdtB_PE=4_SV=1~~~tr|A0A6S7AZW8|A0A6S7AZW8_9BURK_Multidrug_resistance_protein_MdtB_OS=Achromobacter_kerstersii_OX=1353890_GN=mdtB_3_PE=…
3	n26949	1	0	39	1	15	0	0	3.78127e-08	0.00047463	0.706187	6.25023	CAACCAACCGGTATGGGTCGACGAAACCGGCGATCCGCTGCCCCGGACCTGGATGGACAAGGTCGAC	67	tr|A0A0Q8BRF6|A0A0Q8BRF6_9BURK_ABC_transporter_domain-containing_protein_OS=Achromobacter_sp._Root565_OX=1736564_GN=ASD71_20600_PE=4_SV=1~~~tr|A0A2S5GSY7|A0A2S5GSY7_9BURK_Uncharacterized_protein_OS=Achromobacter_spanius_OX=217203_GN=C4E15_10260_PE=4_SV=1~~~tr|A0A3C1XVE0|A0A3C1XVE0_9BURK_Uncharacterized_protein_OS=Achromobacter_sp._OX=134375_GN=DCR74_05530_PE=4_SV=1~~~tr|A0A6S6YMR2|A0A6S6YMR2_9BUR…
3	n27039	1	0	39	1	15	0	0	3.78127e-08	0.00047463	0.706187	6.25023	CGCCGTGATCGAGGAAACCGGCGTGGCCGCAGGCGTCTTGAACCATCCCGCCAATGGCGTA	61	tr|A0A2I8DFB9|A0A2I8DFB9_9BURK_LysR_family_transcriptional_regulator_OS=Achromobacter_sp._AONIH1_OX=1758194_GN=C2U31_08410_PE=3_SV=1~~~tr|A0A1N7QKF2|A0A1N7QKF2_9BURK_DNA-binding_transcriptional_regulator,_LysR_family_OS=Achromobacter_sp._MFA1_R4_OX=1881016_GN=SAMN05428937_2543_PE=3_SV=1~~~tr|H0F7Q6|H0F7Q6_9BURK_LysR_family_transcriptional_regulator_OS=Achromobacter_arsenitoxydans_SY8_OX=477184_GN…
3	n27344	1	0	39	1	15	0	0	3.78127e-08	0.00047463	0.706187	6.25023	GATACGTGGAAACTACTCCACGCCTCCCACATTTGGCGCCGCCCTGGTTGCCGCCATTCTG	61	tr|A0A0X8BWL2|A0A0X8BWL2_9PSED_Aminotransferase_OS=Pseudomonas_monteilii_OX=76759_GN=APT63_10590_PE=3_SV=1~~~tr|A0A7Y4NIU0|A0A7Y4NIU0_9BURK_Filamentous_hemagglutinin_N-terminal_domain-containing_protein_OS=Achromobacter_deleyi_OX=1353891_GN=HLG70_02400_PE=4_SV=1~~~tr|A0A658AF33|A0A658AF33_ALCXX_Aromatic_amino_acid_aminotransferase_(Fragment)_OS=Alcaligenes_xylosoxydans_xylosoxydans_OX=85698_GN=DA…
3	n27354	1	0	39	1	15	0	0	3.78127e-08	0.00047463	0.706187	6.25023	CTTGCCGGTGCTGGCGTTGGCCGAGAAACTACTGGCTCCGGCGCAGAACGGCGGGATGCACAAGCTCAGCCCAAAGCCGGCGCTCTTGTTCTTGGAGTCATATTTGCTGCTGTCCTGCAGGCTTTCCAGCAGCAGG	136	tr|A0A0M9IIT3|A0A0M9IIT3_ALCXX_Filamentous_hemagglutinin_OS=Alcaligenes_xylosoxydans_xylosoxydans_OX=85698_GN=fhaB_1_PE=4_SV=1~~~tr|A0A854PTL5|A0A854PTL5_9BURK_Filamentous_hemagglutinin_OS=Achromobacter_sp._KAs_3-5_OX=1915388_GN=BMR85_028550_PE=4_SV=1~~~tr|A0A6S6YJZ9|A0A6S6YJZ9_9BURK_Haemagg_act_domain-containing_protein_OS=Achromobacter_pestifer_OX=1353889_GN=LMG3431_00536_PE=4_SV=1~~~tr|A0A3Q9K…
3	n27425	1	0	39	1	15	0	0	3.78127e-08	0.00047463	0.706187	6.25023	GGCGCGGTCAACCAGATCGGCGCCGGCACCACCATCCTGACCGCCAACAATACCTACACCGGCGGCACCACGATTTCGGCGGGCACACTGCAACTGGGCGACGGCGGCGCCACGGGCGGTATCGTGGGCAACGTGGCCAACAACGGTGCGCTGAGCTTCAATCGTTCCGACACGGTCACGTTCGCCGGCCTGATCTCGGGCAGCGGCACCGTCAATCAGAACGGCGCCGGCACCACGATCTTGACCGCGCAGAACACCTATGGCGGTTCGACCAACGTCAATAGCGGCGTGCTGCGCGCGGGCGCGGCCTCCACGCTCAGTCCGAACTCGGCAGTGAACGTGGCAGCGGCAGGCACCCTCGATCTGAACGGCTACAGCCAGGCCGCGGCCGGCGTGACC…	1976	tr|A0A2I8DBV6|A0A2I8DBV6_9BURK_Autotransporter_domain-containing_protein_OS=Achromobacter_sp._AONIH1_OX=1758194_GN=C2U31_00035_PE=4_SV=1~~~tr|A0A811H1I6|A0A811H1I6_9BURK_Extracellular_serine_protease_OS=Achromobacter_mucicolens_OX=1389922_GN=LMG3415_05104_PE=4_SV=1~~~tr|A0A2I8DRR1|A0A2I8DRR1_9BURK_Autotransporter_domain-containing_protein_OS=Achromobacter_sp._AONIH1_OX=1758194_GN=C2U31_29940_PE=4…
3	n27465	1	0	39	1	15	0	0	3.78127e-08	0.00047463	0.706187	6.25023	GCTGACTTCGTGGTTCGTGGTGATGGCGCCTGCCGGCACGCCGCAAGCCGTCATCGATAAACTCAACGCCGCCGCCCAGCGGGTGCTGGATGCCCCCGCCACGCGCGAACGCTTGGCCGCCTTG	124	tr|A0A6N0JGP7|A0A6N0JGP7_ACHDE_Tripartite_tricarboxylate_transporter_substrate_binding_protein_OS=Achromobacter_denitrificans_OX=32002_GN=FOC81_05890_PE=3_SV=1~~~tr|A0A5N7ZYL1|A0A5N7ZYL1_9BURK_Tripartite_tricarboxylate_transporter_substrate_binding_protein_OS=Achromobacter_sp._OX=134375_GN=E2603_21020_PE=3_SV=1~~~tr|A0A6S7FCW1|A0A6S7FCW1_9BURK_Uncharacterized_protein_OS=Achromobacter_insolitus_OX…
3	n27493	1	0	39	1	15	0	0	3.78127e-08	0.00047463	0.706187	6.25023	ATCCCGGTCGGCGAAACTCACATCCGGCGTGTCCAGGTCCCCGGAGTGGTAACGGATATCG	61	tr|A0A2S5GVP3|A0A2S5GVP3_9BURK_GGDEF_domain-containing_protein_OS=Achromobacter_spanius_OX=217203_GN=C4E15_09780_PE=4_SV=1~~~tr|E3HGL4|E3HGL4_ACHXA_Diguanylate_cyclase,_GGDEF_domain_protein_6_OS=Achromobacter_xylosoxidans_(strain_A8)_OX=762376_GN=AXYL_02021_PE=4_SV=1~~~tr|A0A6S7EEZ6|A0A6S7EEZ6_9BURK_GGDEF_domain-containing_protein_OS=Achromobacter_pulmonis_OX=1389932_GN=LMG26788_04701_PE=4_SV=1~~…
3	n27496	1	0	39	1	15	0	0	3.78127e-08	0.00047463	0.706187	6.25023	TGCACTCAGCGCTTGTTCGCTGATGCCCGCACCCGCTGTCCAAGTACGGGCTACAAGATCAAACTCACCAAAGCAAAAGGCCGGCATATGCCGGCCTT	98	tr|A0A6S6YRY8|A0A6S6YRY8_9BURK_Malonyl_CoA-acyl_carrier_protein_transacylase_OS=Achromobacter_pestifer_OX=1353889_GN=dltA_2_PE=4_SV=1~~~tr|A0A446CH51|A0A446CH51_9BURK_Cyclic_di-GMP_phosphodiesterase_response_regulator_RpfG_OS=Achromobacter_agilis_OX=1353888_GN=rpfG_PE=4_SV=1
3	n27539	1	0	39	1	15	0	0	3.78127e-08	0.00047463	0.706187	6.25023	TGTAGGGAATGGCGTTCACCTGGGTCAGCAAACTCATCAGCGCCTGCTGGAACGCTGCGTTCAACCAGATCTGGTTGACGTAGGTG	86	tr|A0A2S5GNV7|A0A2S5GNV7_9BURK_Cadherin_domain-containing_protein_(Fragment)_OS=Achromobacter_spanius_OX=217203_GN=C4E15_20625_PE=4_SV=1~~~tr|A0A3C1Y1V2|A0A3C1Y1V2_9BURK_Uncharacterized_protein_OS=Achromobacter_sp._OX=134375_GN=DCR74_17160_PE=4_SV=1~~~tr|A0A424WAX7|A0A424WAX7_ALCXX_DUF3383_domain-containing_protein_OS=Alcaligenes_xylosoxydans_xylosoxydans_OX=85698_GN=DY367_17910_PE=4_SV=1~~~tr|A0…
3	n27552	1	0	39	1	15	0	0	3.78127e-08	0.00047463	0.706187	6.25023	CATCAAGGCCATGGGCGGCGCCAAGCTCAAACTCATCGTCGCCGACGCCACTTCCCAGCCCACCACCGCAGCCACCGTGGCGCAGCGCCTGATCACGCAGAACCGCTGCGTG	112	tr|A0A0Q8WT20|A0A0Q8WT20_9BURK_Phosphatidylinositol_kinase_OS=Achromobacter_sp._Root83_OX=1736602_GN=ASE30_09770_PE=3_SV=1~~~tr|A0A6S6ZRR0|A0A6S6ZRR0_9BURK_Aliphatic_amidase_expression-regulating_protein_OS=Achromobacter_pestifer_OX=1353889_GN=amiC_4_PE=4_SV=1~~~tr|A0A7T4B5J0|A0A7T4B5J0_9BURK_Transporter_substrate-binding_domain-containing_protein_OS=Achromobacter_deleyi_OX=1353891_GN=I6I07_05265…
3	n27695	1	0	39	1	15	0	0	3.78127e-08	0.00047463	0.706187	6.25023	GGCGTTCATCCGAAGGCGTCCCAAATCGCGCTCAATCTGCGCTATTCGTTGCCGCCATCGGGGCAGCTTGCTTGCCTTCGCTTTTGCGAAATTTCGAGGCGACAGCCTCAAACTCCTTCCGCAATGAAGCGTCGTCTATGTCGAGATCGCCGAGGCCAGCGGCAAGGGCAATCTTACCAATGCGTTCAGCGGCCTTGCTTTCCAATTCGGCCAGTTCTGCCTTGATGCGGTTCAGTTCGGCCAGCTTGTCGGCCTTGCGTTCGGAT	266	tr|A0A0D4ZZZ9|A0A0D4ZZZ9_9BURK_Conjugal_transfer_protein_TraC_OS=Achromobacter_sp._LM16_OX=1449778_GN=pLM16A1_p15_PE=4_SV=1~~~tr|A0A193PMK5|A0A193PMK5_ALCXX_TraC_protein_OS=Alcaligenes_xylosoxydans_xylosoxydans_OX=85698_GN=traC_PE=4_SV=1~~~tr|T2K1C4|T2K1C4_ACHDE_Conjugal_transfer_protein_TraC_OS=Achromobacter_denitrificans_OX=32002_GN=traC_PE=4_SV=1~~~tr|A0A3C1XY79|A0A3C1XY79_9BURK_Uncharacterize…
3	n27864	1	0	39	1	15	0	0	3.78127e-08	0.00047463	0.706187	6.25023	TATGCGCGGAAACTCGAAGTCCACGATGATGTATATCGCAGCGGTCATGACCACGGCATAG	61	tr|A0A658A6X4|A0A658A6X4_ALCXX_Uncharacterized_protein_OS=Alcaligenes_xylosoxydans_xylosoxydans_OX=85698_GN=DAI43_36015_PE=4_SV=1~~~tr|A0A0M7JVE2|A0A0M7JVE2_9BURK_Uncharacterized_protein_OS=Achromobacter_aegrifaciens_OX=1287736_GN=ERS370000_03901_PE=4_SV=1~~~tr|A0A6S7C9V5|A0A6S7C9V5_9BURK_Uncharacterized_protein_OS=Achromobacter_anxifer_OX=1287737_GN=LMG26858_01055_PE=4_SV=1~~~tr|A0A6S7FAY9|A0A6S…
3	n27871	1	0	39	1	15	0	0	3.78127e-08	0.00047463	0.706187	6.25023	AGGAGACTCCATGAAACTCGACCGCAGAACCCTACTCAAGGCCGGCATGGCCGCTTCCATC	61	tr|A0A8B5V6U3|A0A8B5V6U3_9BURK_Carbonic_anhydrase_OS=Achromobacter_sp._SLBN-14_OX=2768442_GN=FBY20_5012_PE=4_SV=1~~~tr|A0A3R9FJN6|A0A3R9FJN6_ACHDE_ABC_transporter_substrate-binding_protein_OS=Achromobacter_denitrificans_OX=32002_GN=FOC81_15880_PE=4_SV=1~~~tr|A0A446CMT4|A0A446CMT4_9BURK_Leucine-specific-binding_protein_OS=Achromobacter_veterisilvae_OX=2069367_GN=livK_3_PE=4_SV=1~~~tr|A0A446CE49|A0…
3	n27909	1	0	39	1	15	0	0	3.78127e-08	0.00047463	0.706187	6.25023	CATGCAGACCATCCTGGCCGACGCCGAGGTACGCGACAAACTCGCCGGCCTGGGCATGGAAGCCGCCCAGGCC	73	tr|A0A811GPG8|A0A811GPG8_9BURK_Uncharacterized_protein_OS=Achromobacter_mucicolens_OX=1389922_GN=LMG3415_00901_PE=4_SV=1~~~tr|A0A6S7ES97|A0A6S7ES97_9BURK_Uncharacterized_protein_OS=Achromobacter_piechaudii_OX=72556_GN=LMG1861_04961_PE=3_SV=1~~~tr|D4XA39|D4XA39_9BURK_Tat_pathway_signal_sequence_domain_protein_OS=Achromobacter_piechaudii_ATCC_43553_OX=742159_GN=HMPREF0004_2336_PE=3_SV=1~~~tr|A0A446…
3	n27951	1	0	39	1	15	0	0	3.78127e-08	0.00047463	0.706187	6.25023	AAGCAGCGGGCCCCGCAAACCTCGCCACTACCCACGGGTCTGACGGCGCAGCGAACCAAGAAACTCGTAGTCCGGCGGCGCGGGCCTGGTGGCTGCGAGCAACCTCGATGCGCCCGAGGG	120	tr|A0A6J4ZJ09|A0A6J4ZJ09_9BURK_Uncharacterized_protein_OS=Achromobacter_insuavis_OX=1287735_GN=LMG26845_00834_PE=4_SV=1~~~tr|A0A0M7HEI5|A0A0M7HEI5_9BURK_Uncharacterized_protein_OS=Achromobacter_sp._OX=134375_GN=ERS370003_01986_PE=4_SV=1~~~tr|A0A446CG37|A0A446CG37_9BURK_Sulfate/thiosulfate_import_ATP-binding_protein_CysA_OS=Achromobacter_veterisilvae_OX=2069367_GN=cysA_4_PE=4_SV=1~~~tr|A0A2S5GM86|…
3	n28074	1	0	39	1	15	0	0	3.78127e-08	0.00047463	0.706187	6.25023	CTTGACCGGAAACTTCAGCTTGGGCGCGGCCTCCCTGACCATGGCCCAGAAGGCGTGCGCA	61	tr|A0A0M7I8F1|A0A0M7I8F1_9BURK_Cyn_operon_transcriptional_activator_OS=Achromobacter_aegrifaciens_OX=1287736_GN=cynR_13_PE=3_SV=1~~~tr|A0A6S7EV49|A0A6S7EV49_9BURK_HTH-type_transcriptional_regulator_CynR_OS=Achromobacter_insolitus_OX=217204_GN=cynR_1_PE=3_SV=1~~~tr|A0A424WHQ2|A0A424WHQ2_ALCXX_LysR_family_transcriptional_regulator_OS=Alcaligenes_xylosoxydans_xylosoxydans_OX=85698_GN=DY367_06115_PE=…
3	n28216	1	0	39	1	15	0	0	3.78127e-08	0.00047463	0.706187	6.25023	GAAGACGCGCGCCCGGATCAATCCAGAAACTTGAACGGTTTGATGCTCCAGGGGCAGAGTCAAGCGGCGCTCGCGCGCCGTTCATGCGTGCCGAACCAGACGCCCGATAACACCAGAACAAAAGCCCCCGTC	132	tr|A0A176XKN7|A0A176XKN7_ALCXX_Phosphoglucomutase_OS=Alcaligenes_xylosoxydans_xylosoxydans_OX=85698_GN=A7J67_10740_PE=3_SV=1~~~tr|A0A811GQK2|A0A811GQK2_9BURK_Phosphomannomutase/phosphoglucomutase_OS=Achromobacter_mucicolens_OX=1389922_GN=algC_2_PE=4_SV=1~~~tr|A0A366GCQ8|A0A366GCQ8_9BURK_Putative_dienelactone_hydrolase_OS=Achromobacter_marplatensis_OX=470868_GN=DFP87_1011051_PE=4_SV=1~~~tr|A0A6S7F…
3	n28278	1	0	39	1	15	0	0	3.78127e-08	0.00047463	0.706187	6.25023	GCTGCCCTGGCGCACCATGCGCTCGGCGGCAAACTTGGCCAGCAGCATGCCAGCGACCATG	61	tr|A0A448C5G4|A0A448C5G4_9BURK_Gluconate_5-dehydrogenase_OS=Achromobacter_spanius_OX=217203_GN=gno_5_PE=4_SV=1~~~tr|A0A451EWM6|A0A451EWM6_9BURK_SDR_family_oxidoreductase_OS=Achromobacter_spanius_OX=217203_GN=ELS24_00300_PE=4_SV=1~~~tr|H0EZZ9|H0EZZ9_9BURK_Gluconate_5-dehydrogenase_OS=Achromobacter_arsenitoxydans_SY8_OX=477184_GN=KYC_00450_PE=4_SV=1~~~tr|A0A1N7QAH2|A0A1N7QAH2_9BURK_Gluconate_5-dehy…
3	n28399	1	0	39	1	15	0	0	3.78127e-08	0.00047463	0.706187	6.25023	CATCCCGCTGGAGAACGGGGCATCGGTGCGGGTGTTGGGGCGGGTCGTGTGGGCGGGGGCAAGGTTGAGGGATGATGAGACGGGGCGGTGGGCGCAGCCTTAGCCAGGCCTGGATATCAAATCTAAACTGACGTGCCCGCGGAATATCCGTACAGGTCAAAACTAGAGG	169	tr|A0A3S9YYU0|A0A3S9YYU0_9BURK_LexA_family_transcriptional_regulator_OS=Achromobacter_spanius_OX=217203_GN=ELS24_20915_PE=4_SV=1~~~tr|A0A7U0I2Y2|A0A7U0I2Y2_ALCXX_LexA_family_transcriptional_regulator_OS=Alcaligenes_xylosoxydans_xylosoxydans_OX=85698_GN=I6I48_24500_PE=4_SV=1~~~tr|A0A448CB63|A0A448CB63_9BURK_Peptidase_S24_domain-containing_protein_OS=Achromobacter_spanius_OX=217203_GN=NCTC13519_043…
3	n28403	1	0	39	1	15	0	0	3.78127e-08	0.00047463	0.706187	6.25023	CGGCGCCTACGACAAACTGATACTTGCGACAGGCTCCTACCCCTTCGTGCCGCCGATCACG	61	tr|A0A176XNW6|A0A176XNW6_ALCXX_Nitrite_reductase_large_subunit_OS=Alcaligenes_xylosoxydans_xylosoxydans_OX=85698_GN=A7J67_19005_PE=4_SV=1~~~tr|A0A811GRN3|A0A811GRN3_9BURK_Nitrite_reductase_[NAD(P)H]_OS=Achromobacter_mucicolens_OX=1389922_GN=nasD_2_PE=4_SV=1~~~tr|A0A8B5V5S8|A0A8B5V5S8_9BURK_Assimilatory_nitrite_reductase_(NAD(P)H)_large_subunit_OS=Achromobacter_sp._SLBN-14_OX=2768442_GN=FBY20_4661…
3	n28426	1	0	39	1	15	0	0	3.78127e-08	0.00047463	0.706187	6.25023	AATCCATCCAAACTGATCCGCTTTTTTATTCATTCTCTGAATCTGTACTGATCCAGGCTGCGGC	64
3	n28537	1	0	39	1	15	0	0	3.78127e-08	0.00047463	0.706187	6.25023	GAAACTGCATCGATCGGGCTGGATCGAAGAACGCAACTTCGA	42	tr|J4YNE8|J4YNE8_9BURK_Uncharacterized_protein_OS=Achromobacter_marplatensis_OX=470868_GN=DFP87_102936_PE=4_SV=1~~~tr|A0A095X3Y0|A0A095X3Y0_9BURK_Uncharacterized_protein_OS=Achromobacter_sp._RTa_OX=1532557_GN=JL37_12025_PE=4_SV=1~~~tr|A0A446CWL6|A0A446CWL6_9BURK_Uncharacterized_protein_OS=Achromobacter_agilis_OX=1353888_GN=AGI3411_05523_PE=4_SV=1~~~tr|A0A6S7DKL1|A0A6S7DKL1_9BURK_Uncharacterized_p…
3	n28627	1	0	39	1	15	0	0	3.78127e-08	0.00047463	0.706187	6.25023	ATCGGAGAAACTGCCGGCACGATGCGTCTTGGTCTTCATCGTTTCAAGCATGCAATTCTGCGGGCCGG	68	tr|A0A0M7MLF5|A0A0M7MLF5_9BURK_Site-specific_tyrosine_recombinase_XerC_OS=Achromobacter_aegrifaciens_OX=1287736_GN=ERS370000_06388_PE=4_SV=1~~~tr|A0A0M7I0P2|A0A0M7I0P2_9BURK_Iron-dicitrate_transporter_substrate-binding_subunit_OS=Achromobacter_aegrifaciens_OX=1287736_GN=ERS370000_02993_PE=4_SV=1
3	n28841	1	0	39	1	15	0	0	3.78127e-08	0.00047463	0.706187	6.25023	GGAGCGCGAGGTAATCAAGAAGTTGGGGAACATCATGAACAAGTGAGGTTCACGCCGCGCCAGCCTGCAACGGGTGTCCACGATAAGCAACACTATTTCAAATAGTTGCACATTCCATGAGACCCCCCGTGCTACGTTGAGTCGCAAGCCATTACACGGGTGATTCGTATTTGAATCTCCGATTGTCGGTTGCCTAGTTCCTACCCAGGTTGTTTCGCGAGTGCCCCGATGGAGGCGTGAATGCGTAACAGGCAGATGGAAGGATGCAATAGCGGCGCGGCGCCACTCCCGGCTGAGACATGGATGACGGCTCGCTGGCTGCTGCTGGGGTCGCTGTCATTGGGCGCGGCGGATGCCGTGGCGCAAACGACATGTCCGGCGGGACCCGTCACCCGCTCG…	4368	tr|E3HYE2|E3HYE2_ACHXA_Outer_membrane_autotransporter_barrel_domain_protein_10_OS=Achromobacter_xylosoxidans_(strain_A8)_OX=762376_GN=AXYL_06814_PE=4_SV=1~~~tr|A0A811H1I6|A0A811H1I6_9BURK_Extracellular_serine_protease_OS=Achromobacter_mucicolens_OX=1389922_GN=LMG3415_05104_PE=4_SV=1~~~tr|A0A3S4N7N0|A0A3S4N7N0_9BURK_Extracellular_serine_protease_OS=Achromobacter_spanius_OX=217203_GN=NCTC13519_0308…
3	n28888	1	0	39	1	15	0	0	3.78127e-08	0.00047463	0.706187	6.25023	GACGAAACTGCGGTTGCCGATGACGGTGGGCCGCAAG	37	tr|A0A446CK42|A0A446CK42_9BURK_Dimodular_nonribosomal_peptide_synthase_OS=Achromobacter_agilis_OX=1353888_GN=dhbF_PE=4_SV=1~~~tr|A0A6S7AHE3|A0A6S7AHE3_9BURK_D-alanine--D-alanyl_carrier_protein_ligase_OS=Achromobacter_deleyi_OX=1353891_GN=dltA_3_PE=4_SV=1~~~tr|A0A0M7LGM3|A0A0M7LGM3_9BURK_Dimodular_nonribosomal_peptide_synthase_OS=Achromobacter_sp._OX=134375_GN=dhbF_PE=4_SV=1~~~tr|A0A6J5AA17|A0A6J5…
3	n28895	1	0	39	1	15	0	0	3.78127e-08	0.00047463	0.706187	6.25023	GTATCACTTCGCCCTGTATGAGCTGCAAGCCACGGTAGAAGCCTTGGGCATGACCGACGCGGCCGACATGCTGGCCGTGATGGTCGATGGCAAGCGCCTGAAAGACATTTCCGATTTGCCGCTGGATTTGGCCGTATGAACCAGGCTGCCACCATCAGCGCCGCCGTTCCTGCGGACGTGAAAGCCGAAGCTGCCGCCGTCGCGGCAGCGCACGGCATGAGCCTGGCCGGCCTGGTGCGCGAGCTGGTGGCCCGCGTGGCCGCCCGCGAAGCTGAAACGCTGGCCTGGCTCGATGAGGCCCGCCGATGAGCCGCCCGCGCTACACGCTCGATGAGCTGCTGGCCGAATCCGACTATTCGCAGCCGCTACCGCCCGAAGAACGGGAATGGGTCGATGCGC…	2369	tr|H0F3K6|H0F3K6_9BURK_Extra-cytoplasmic_solute_receptor_family_protein_72_OS=Achromobacter_arsenitoxydans_SY8_OX=477184_GN=KYC_06801_PE=3_SV=1~~~tr|A0A1N7R953|A0A1N7R953_9BURK_Tripartite-type_tricarboxylate_transporter,_receptor_component_TctC_OS=Achromobacter_sp._MFA1_R4_OX=1881016_GN=SAMN05428937_5066_PE=3_SV=1~~~tr|A0A7T4E466|A0A7T4E466_9BURK_DegQ_family_serine_endoprotease_OS=Achromobacter_d…
3	n28983	1	0	39	1	15	0	0	3.78127e-08	0.00047463	0.706187	6.25023	GCCTGGCGGGAGGCAAACTGTTGCTGGGCACTGGCAGCGCGCTGGGCAGTGGCAGCCTGCGCGTCACGGGGGCGGCTGCGTTGGACAGCAGCGCTGCAATCGCGCTGTCCAACGCCATTGCCCTGGACGCGGATCTGACCTTGGCGGGAAGCAACAACCTTGCGCTGAACG	171	tr|A0A2N8KFG4|A0A2N8KFG4_9BURK_MFS_transporter_OS=Achromobacter_pulmonis_OX=1389932_GN=C1I89_20490_PE=4_SV=1~~~tr|F7T3C4|F7T3C4_9BURK_Sugar_transporter_family_protein_5_OS=Achromobacter_insuavis_AXX-A_OX=1003200_GN=AXXA_17276_PE=4_SV=1~~~tr|A0A120LHA9|A0A120LHA9_ALCXX_MFS_transporter_OS=Alcaligenes_xylosoxydans_xylosoxydans_OX=85698_GN=AL504_12135_PE=4_SV=1~~~tr|A0A0M7F0J1|A0A0M7F0J1_9BURK_Prolin…
3	n29015	1	0	39	1	15	0	0	3.78127e-08	0.00047463	0.706187	6.25023	GGCGGCGCTGGCCGCATTCGCCAAACTGGAAACGCCCGAAGGCGACTTCTATCTGGGCAATACCCAGGTC	70	tr|A0A6S7A9T5|A0A6S7A9T5_9BURK_VWFA_domain-containing_protein_OS=Achromobacter_deleyi_OX=1353891_GN=LMG3458_03096_PE=4_SV=1~~~tr|A0A5N7ZP61|A0A5N7ZP61_9BURK_VWA_domain-containing_protein_OS=Achromobacter_sp._OX=134375_GN=E2603_03245_PE=4_SV=1~~~tr|J4YB64|J4YB64_9BURK_VWFA_domain-containing_protein_OS=Achromobacter_marplatensis_OX=470868_GN=QWC_19360_PE=4_SV=1~~~tr|A0A2S8V628|A0A2S8V628_9BURK_VWFA…
3	n29104	1	0	39	1	15	0	0	3.78127e-08	0.00047463	0.706187	6.25023	GGTGTTCCTGGTGTTGAAGGACATCTGGAAACTGGAGCTGGCCGAACTCACGGACGTAGCGCGCTGGACCGCCCGCGCCATCATCGCG	88	tr|A0A6N0JXJ4|A0A6N0JXJ4_ACHDE_Phytanoyl-CoA_dioxygenase_family_protein_OS=Achromobacter_denitrificans_OX=32002_GN=FOC81_15290_PE=4_SV=1~~~tr|A0A446C8E1|A0A446C8E1_9BURK_Aliphatic_sulfonates_transport_permease_protein_SsuC_OS=Achromobacter_veterisilvae_OX=2069367_GN=ssuC_3_PE=3_SV=1~~~tr|A0A0L8ELP6|A0A0L8ELP6_9BURK_TetR_family_transcriptional_regulator_OS=Achromobacter_sp._DMS1_OX=1688405_GN=AD42…
3	n29238	1	0	39	1	15	0	0	3.78127e-08	0.00047463	0.706187	6.25023	CTATGTGGACGATTCCGAACTCAGCCAGTATCTCACCACCATGGGGCGCAAACTGGCGGCCTTCGCGCCCGGCGCGGTCCCCGAGGTC	88	tr|A0A6J5H7H2|A0A6J5H7H2_9BURK_Beta-barrel_assembly-enhancing_protease_OS=Achromobacter_insuavis_OX=1287735_GN=bepA_1_PE=4_SV=1~~~tr|A0A0M7KI97|A0A0M7KI97_9BURK_Uncharacterized_metalloprotease_yggG_OS=Achromobacter_sp._OX=134375_GN=yggG_2_PE=4_SV=1~~~tr|A0A658AG86|A0A658AG86_ALCXX_Lysis_protein_(Fragment)_OS=Alcaligenes_xylosoxydans_xylosoxydans_OX=85698_GN=DAI43_13680_PE=4_SV=1~~~tr|A0A6S7FB83|A…
3	n29422	1	0	39	1	15	0	0	3.78127e-08	0.00047463	0.706187	6.25023	GCTGCGCGTGCTGGCCAGCAAACTGGGCGCCGCCTGGGGCCAGCCCGTGGTGGTGGAAAACAAGCCGGGC	70	tr|A0A2S0I9G4|A0A2S0I9G4_9BURK_Uncharacterized_protein_OS=Achromobacter_spanius_OX=217203_GN=CLM73_15700_PE=3_SV=1~~~tr|D4XCG4|D4XCG4_9BURK_Uncharacterized_protein_OS=Achromobacter_piechaudii_ATCC_43553_OX=742159_GN=HMPREF0004_3161_PE=3_SV=1~~~tr|A0A6S7CU06|A0A6S7CU06_9BURK_Uncharacterized_protein_OS=Achromobacter_piechaudii_OX=72556_GN=LMG1861_02327_PE=3_SV=1~~~tr|A0A6S6Z6D3|A0A6S6Z6D3_9BURK_Unc…
3	n29705	1	0	39	1	15	0	0	3.78127e-08	0.00047463	0.706187	6.25023	CGAGACGCACGCGATCTTCAAGCTGGTCAAGTTGTCGGCCAGCTTCAAGTACACATGCTACGTGCTGGCGTTTGATGACGAGGTGGTTTCCGCCGCGCTCGGTGAGCGGTATGGCGCGGGGGGCGCTGAGGCAGGGCGTGCATTCCTTGAGAAGATCATTCAAGTACCGCTGCACTTGCCACCGGCCGACCGCCTAAGTCTTCGAAAACTAACCCTCGAAGGCGTGGACCGCGCTTTACAGCAAGCGGGCATATCAATCGACCAGGCACAAGTTGACAAGTTTATGCGCCCGTTCGTCGACGGCCTTGAGCCGAAGCTACAAACGCCGCGGCTCGCAAAGCAGTACATCAACGCTCTCCTGTTTTCGTTGCCCTTGGTAAAGGGGGAGGTGAACATTGC…	1483	tr|A0A366FUW7|A0A366FUW7_9BURK_Putative_KAP-like_P-loop_ATPase_OS=Achromobacter_marplatensis_OX=470868_GN=DFP87_1062_PE=4_SV=1~~~tr|A0A6S6YX77|A0A6S6YX77_9BURK_KAP_NTPase_domain-containing_protein_OS=Achromobacter_pestifer_OX=1353889_GN=LMG3431_01429_PE=4_SV=1~~~tr|A0A1N7P253|A0A1N7P253_9BURK_Predicted_P-loop_ATPase,_KAP-like_OS=Achromobacter_sp._MFA1_R4_OX=1881016_GN=SAMN05428937_0384_PE=4_SV=1~…
3	n29813	1	0	39	1	15	0	0	3.78127e-08	0.00047463	0.706187	6.25023	AAACGATGAAAGCGATGCTGTCGATGGGGGCTGAGCCCCTCATATGACCAACGACGCACTTCAGTTCCTGTCCGAACGCTCAAGCGGCCTTCAGGGAGTCCCGCCTTGAAGACCCTCCAAGTTGCTGCGGTCCAGGCGAATGCAACGTGGTTGTTAGGACGAGTGGAGTTTCCACACGCCCTCTGCCGAGAGTGGCCGTCGATGACGGGCAGTTACCGACCCAAAGCGGGCGTAGCGAGACCGCCGCTGGAATGCTGGGATTTGCGGCGGTCTGCGCAGCCAGAGTGTCAACAGGACAGTCATTGAAATACAGGAGTACGTGGTGATGAAGGTATTTTTCTATTGCGATGAGTCGGGAGCAAAGGGCTACGCTAACCAAGACGAAGCCTTCGCCGGGGA…	2336	tr|E3HNJ4|E3HNJ4_ACHXA_Zinc-binding_dehydrogenase_family_protein_3_OS=Achromobacter_xylosoxidans_(strain_A8)_OX=762376_GN=AXYL_02538_PE=4_SV=1~~~tr|A0A7T4E6A5|A0A7T4E6A5_9BURK_Trypsin-like_peptidase_domain-containing_protein_OS=Achromobacter_deleyi_OX=1353891_GN=I6I07_10475_PE=4_SV=1~~~tr|A0A0Q8WXG6|A0A0Q8WXG6_9BURK_Uncharacterized_protein_OS=Achromobacter_sp._Root83_OX=1736602_GN=ASE30_16685_PE=…
3	n29877	1	0	39	1	15	0	0	3.78127e-08	0.00047463	0.706187	6.25023	GGTGCACAGCGCGCGGGCCAGCTCCACCCGCGCCTGTTCGGGAAACGAGAGCTCGCCGGCCGGCTTGCGCGCGATGCCG	79	tr|A0A811H9H8|A0A811H9H8_9BURK_Uncharacterized_protein_OS=Achromobacter_mucicolens_OX=1389922_GN=LMG3415_05765_PE=4_SV=1~~~tr|A0A854PP45|A0A854PP45_9BURK_GGDEF_domain-containing_protein_OS=Achromobacter_sp._KAs_3-5_OX=1915388_GN=BMR85_026175_PE=4_SV=1~~~tr|A0A8B5UV98|A0A8B5UV98_9BURK_Diguanylate_cyclase_(GGDEF)-like_protein_OS=Achromobacter_sp._SLBN-14_OX=2768442_GN=FBY20_1350_PE=4_SV=1~~~tr|A0A2…
3	n30004	1	0	39	1	15	0	0	3.78127e-08	0.00047463	0.706187	6.25023	GATGAAGGAAGCGGACAGGATCAGGGCGGAAACGAGGGTCTTCATGGTTGATCTCCAGTAA	61	tr|A0A3R9FMA0|A0A3R9FMA0_ACHDE_DUF4148_domain-containing_protein_OS=Achromobacter_denitrificans_OX=32002_GN=FOC81_28875_PE=4_SV=1~~~tr|A0A3C1XW44|A0A3C1XW44_9BURK_DUF4148_domain-containing_protein_OS=Achromobacter_sp._OX=134375_GN=DCR74_07740_PE=4_SV=1~~~tr|A0A6S7DCV8|A0A6S7DCV8_9BURK_Uncharacterized_protein_OS=Achromobacter_anxifer_OX=1287737_GN=LMG26858_03433_PE=4_SV=1~~~tr|A0A6S7F1B7|A0A6S7F1B…
3	n30044	1	0	39	1	15	0	0	3.78127e-08	0.00047463	0.706187	6.25023	GCGGATGCGCAAAGGCAGACGCAAACGCAATGATTCTTTCCTGGCGGTCCGGTTTGCGCAA	61
3	n30045	1	0	39	1	15	0	0	3.78127e-08	0.00047463	0.706187	6.25023	GGAAACGCAATGCCCGGGCATGCTGCGCTTCCTGGCGGCGTTGCCCTACCGGC	53	tr|D4XHF5|D4XHF5_9BURK_Uncharacterized_protein_OS=Achromobacter_piechaudii_ATCC_43553_OX=742159_GN=HMPREF0004_4902_PE=4_SV=1~~~tr|A0A1N7P177|A0A1N7P177_9BURK_Uncharacterized_protein_OS=Achromobacter_sp._MFA1_R4_OX=1881016_GN=SAMN05428937_0361_PE=4_SV=1
3	n30052	1	0	39	1	15	0	0	3.78127e-08	0.00047463	0.706187	6.25023	CAACCACGTGACCACGGCCTTCATGCAAGGTGGCTTTTCGGCTGAGCAGGTGGCCCTGGCCTACCACCTGCTGGCGCAATTCCTGGTCGCAAGCAGCCGTGCCGAAGCGTCCAAGCAGTTGCCTGTCTACCATCGCGATTTCATCCGCGGACGGCTGGATGCCATGCCGGCGGACCGCTATCCCGGAGCCCGCTACGTCGCAGAGGCGTTCTCAGGACTAAGTACCGAATTGGCATTTGAAGCCGGCCTGCGGATCCTGCTCGACGGCATCGCGCAATGGGCCCGGGAGCCTGGCGTGCAGGCCAAGCCCAAACGCAAGACGGCCACCCGATAGTCCTCCCCGATTCCGGCGCGCAAGTGCGCGAGCGCGTGGTGTAAACCCTTATTTAACACTATATC…	1576	tr|A0A6N0JGP7|A0A6N0JGP7_ACHDE_Tripartite_tricarboxylate_transporter_substrate_binding_protein_OS=Achromobacter_denitrificans_OX=32002_GN=FOC81_05890_PE=3_SV=1~~~tr|A0A5N7ZYL1|A0A5N7ZYL1_9BURK_Tripartite_tricarboxylate_transporter_substrate_binding_protein_OS=Achromobacter_sp._OX=134375_GN=E2603_21020_PE=3_SV=1~~~tr|A0A2S5GK15|A0A2S5GK15_9BURK_ABC_transporter_substrate-binding_protein_OS=Achromob…
3	n30190	1	0	39	1	15	0	0	3.78127e-08	0.00047463	0.706187	6.25023	GGAGACAATCTTGAAACGCATCCTGCAGAGTCTTGCCCTCTCTTGCGCGGCCATGGCCGCG	61	tr|A0A366G8I6|A0A366G8I6_9BURK_Pimeloyl-ACP_methyl_ester_carboxylesterase_OS=Achromobacter_marplatensis_OX=470868_GN=DFP87_102977_PE=4_SV=1~~~tr|J4YN76|J4YN76_9BURK_Hydrolase_OS=Achromobacter_marplatensis_OX=470868_GN=QWC_14899_PE=4_SV=1~~~tr|A0A7D4DZS8|A0A7D4DZS8_9BURK_Tripartite_tricarboxylate_transporter_substrate_binding_protein_OS=Achromobacter_pestifer_OX=1353889_GN=FOC84_11150_PE=3_SV=1~~~…
3	n30497	1	0	39	1	15	0	0	3.78127e-08	0.00047463	0.706187	6.25023	CAGGCTGCCCGGCTTGAGAACGTGCCGGACGGCGTTTTGCTGCTCTGCCGATAGGGTGCCTGCGCCGTCAATCGCCGCGTTCGTGATGGGGCCGGAAACGCCATGCCTGCCGGTTCTCGCCAGGCGCTCGGCACTGTCCACCATGCCGCGCTCGATGTCGATCATTTCGCGGGTAGAGAACTTCGCCGGGTCGCGCCCGTTGGCCGGTTCCATCTCGACCAGAAGCGGCGAATTTTCCAGCCTGGCAAGCAAGCCCTGGAACTGGTCGGCATCGTCAATGTAGCGGTTCAGCTCTGCGGCAATATCGCGGCGCGTGAATACCGCTTGCGTGGCCGTGAGCTTGTCTAGGATGATCTCCGGCCGCTCGACAATCTGCCGCGCCTGCTCCTGCCGGTCGGCG	400	tr|A0A2S5GUY1|A0A2S5GUY1_9BURK_UDP-N-acetylglucosamine_2-epimerase_(Non-hydrolyzing)_OS=Achromobacter_spanius_OX=217203_GN=C4E15_08325_PE=3_SV=1~~~tr|A0A0D5A100|A0A0D5A100_9BURK_Conjugal_transfer_protein_TraA_OS=Achromobacter_sp._LM16_OX=1449778_GN=pLM16A1_p14_PE=3_SV=1~~~tr|T2K1B0|T2K1B0_ACHDE_Conjugal_transfer_protein_TraA_OS=Achromobacter_denitrificans_OX=32002_GN=traA_PE=3_SV=1~~~tr|A0A193PMW…
3	n30630	1	0	39	1	15	0	0	3.78127e-08	0.00047463	0.706187	6.25023	GCAGGCGGAAACGCCCGAGCCCAGATGGGCCGCAATGATCTTGCCGTCGGCGATGTCCGGC	61	tr|A0A2I8DGP7|A0A2I8DGP7_9BURK_Acetate_kinase_OS=Achromobacter_sp._AONIH1_OX=1758194_GN=ackA_PE=3_SV=1~~~tr|A0A3C1Y2W7|A0A3C1Y2W7_9BURK_Butyrate_kinase_(Fragment)_OS=Achromobacter_sp._OX=134375_GN=DCR74_20125_PE=3_SV=1~~~tr|A0A854Q0G1|A0A854Q0G1_9BURK_Acetate_kinase_OS=Achromobacter_sp._KAs_3-5_OX=1915388_GN=BMR85_002590_PE=4_SV=1~~~tr|A0A2S0IC31|A0A2S0IC31_9BURK_Acetate_kinase_OS=Achromobacter_s…
3	n30877	1	0	39	1	15	0	0	3.78127e-08	0.00047463	0.706187	6.25023	TACGGCATGTGGGCGCCGGCGCAAACGCCGCCTGAACTGGTCGCACGCATCTACCAACAGGTGAACGCGGTGCTGCAACAGCCTGACGTGCGAGCGCGCCTGGCCGACGCGCAGGCCATGCCGGTGGGCGATACGCCCGAACACTTCGACGCGTATTGCCGATCCGAAGCGCAGCGCTATGCCGAGATCGTGCGGCTGGCCGGGATCCGGCTGCAATGAACGCCGGTCACTCTCCCCGCCACGCGCGGGTGCTCATCCTGGGCTCCGGACCGGCGGGCTATGCCGCCGCGGTCTACGCCGCCCGCGCCAACCTGAGGCCGGTACTGATCGCGGGCATGGCGCAGGGCGGCCAGCTCATGACCACGACGGACGTCGACAACTGGCCTGCCGACGTACACG…	1416	tr|A0A446CFT1|A0A446CFT1_9BURK_Uncharacterized_protein_OS=Achromobacter_veterisilvae_OX=2069367_GN=AVE30378_02241_PE=3_SV=1~~~tr|A0A6S7CF47|A0A6S7CF47_9BURK_Uncharacterized_protein_OS=Achromobacter_anxifer_OX=1287737_GN=LMG26858_01471_PE=3_SV=1~~~tr|A0A0M7D2C2|A0A0M7D2C2_9BURK_Argininosuccinate_lyase_OS=Achromobacter_aegrifaciens_OX=1287736_GN=ERS370000_00571_PE=3_SV=1~~~tr|A0A658A6V3|A0A658A6V3_…
3	n30900	1	0	39	1	15	0	0	3.78127e-08	0.00047463	0.706187	6.25023	TCGAGTAGGCGCGGCAAACGCCGCCGCCATGAGGCGGCGCGCGAACGACAAGAAAATTCCA	61
3	n30906	1	0	39	1	15	0	0	3.78127e-08	0.00047463	0.706187	6.25023	GCGGCAAACGCCGCCGCCCTCGATGGCGCCGACCTGC	37	tr|A0A0L8EUQ6|A0A0L8EUQ6_9BURK_Allantoate_amidohydrolase_OS=Achromobacter_sp._DMS1_OX=1688405_GN=AD428_03500_PE=3_SV=1~~~tr|A0A424W5P3|A0A424W5P3_ALCXX_Zn-dependent_hydrolase_OS=Alcaligenes_xylosoxydans_xylosoxydans_OX=85698_GN=DY367_27285_PE=3_SV=1~~~tr|A0A0M9IHP6|A0A0M9IHP6_9BURK_N-carbamoyl-L-amino_acid_hydrolase_OS=Achromobacter_aegrifaciens_OX=1287736_GN=amaB_4_PE=3_SV=1~~~tr|A0A1R1JXR8|A0A1…
3	n31113	1	0	39	1	15	0	0	3.78127e-08	0.00047463	0.706187	6.25023	CTGATGGCACGTGAAACGCCGGAAAGCCCGGGTTGTTCCCGCTCGGCCGCTTTGGCGCTCTTGCACCGCTTGGCGGCATGTCGCGTCGCCTGCTT	95	tr|A0A095WTA5|A0A095WTA5_9BURK_Uncharacterized_protein_OS=Achromobacter_sp._RTa_OX=1532557_GN=JL37_21395_PE=4_SV=1~~~tr|A0A848NDT0|A0A848NDT0_9BURK_Relaxase/mobilization_nuclease_domain-containing_protein_OS=Achromobacter_ruhlandii_OX=72557_GN=HGQ98_02420_PE=4_SV=1~~~tr|A0A4Q1HML6|A0A4Q1HML6_9BURK_Uncharacterized_protein_OS=Achromobacter_aloeverae_OX=1750518_GN=C7R54_13115_PE=4_SV=1~~~tr|A0A2N8KJ…
3	n31159	1	0	39	1	15	0	0	3.78127e-08	0.00047463	0.706187	6.25023	GACTCAAAGCGCAAACGCCGGCGCGGATGCCGCGGCCCCCGCGCGCCTGCTGGCGCAGCGC	61
3	n31184	1	0	39	1	15	0	0	3.78127e-08	0.00047463	0.706187	6.25023	CTGCGCGAAGGCGCGGGCCAGGTCGACGGAAACGCCGGCGGCCGCGCCGCTGGCGTCGCGG	61	tr|J4Y679|J4Y679_9BURK_Catalase_OS=Achromobacter_marplatensis_OX=470868_GN=QWC_31031_PE=3_SV=1~~~tr|A0A7X9VZ44|A0A7X9VZ44_9BURK_Catalase_OS=Achromobacter_sp._Bel_OX=2727415_GN=HG262_06190_PE=3_SV=1~~~tr|A0A366G4W4|A0A366G4W4_9BURK_Catalase_OS=Achromobacter_marplatensis_OX=470868_GN=DFP87_103603_PE=3_SV=1~~~tr|A0A2S8VIR4|A0A2S8VIR4_9BURK_Catalase_OS=Achromobacter_sp._MYb9_OX=1827284_GN=CQ050_04490…
3	n31254	1	0	39	1	15	0	0	3.78127e-08	0.00047463	0.706187	6.25023	GAAGAGTACGGCAGCCAGCCGCTCCCTGAAACGCTCAAGACGCTTGATCTCCCCGCAGTAC	61	tr|A0A424WKU1|A0A424WKU1_ALCXX_Arginase_family_protein_OS=Alcaligenes_xylosoxydans_xylosoxydans_OX=85698_GN=DY367_00410_PE=3_SV=1~~~tr|A0A658AF19|A0A658AF19_ALCXX_Arginase_OS=Alcaligenes_xylosoxydans_xylosoxydans_OX=85698_GN=DAI43_08120_PE=3_SV=1~~~tr|A0A0M7F360|A0A0M7F360_9BURK_Arginase_OS=Achromobacter_aegrifaciens_OX=1287736_GN=arg_PE=3_SV=1~~~tr|E3HXG7|E3HXG7_ACHXA_Arginase_family_protein_2_O…
3	n31258	1	0	39	1	15	0	0	3.78127e-08	0.00047463	0.706187	6.25023	CGCAAACGCTCACCACATCGCCCGAAAACCTAGATTTCTTCCATCAACGCAGTCGCCTCGCGG	63
3	n31380	1	0	39	1	15	0	0	3.78127e-08	0.00047463	0.706187	6.25023	CTTGCGGACGGTGATCTCCAGCACCACGAAACGCTTGTCGTTCTTCAGGTACTTGTCCTTCACCAGCACGCTGGCCTCC	79	tr|A0A6S6YUE5|A0A6S6YUE5_9BURK_Sialic_acid_transporter_NanT_OS=Achromobacter_pestifer_OX=1353889_GN=nanT_1_PE=4_SV=1~~~tr|A0A5N7ZNB1|A0A5N7ZNB1_9BURK_Uncharacterized_protein_OS=Achromobacter_sp._OX=134375_GN=E2603_10465_PE=4_SV=1~~~tr|A0A7D4E4C8|A0A7D4E4C8_9BURK_Uncharacterized_protein_OS=Achromobacter_pestifer_OX=1353889_GN=FOC84_11160_PE=4_SV=1~~~tr|A0A0M7ITK6|A0A0M7ITK6_9BURK_Uncharacterized_p…
3	n31575	1	0	39	1	15	0	0	3.78127e-08	0.00047463	0.706187	6.25023	CGTGGTGGGCGTGGAAACGCTGGAGGACGCAGTTGCGTTCATCAACCGCAATCCCAACGGC	61	tr|A0A120HIS4|A0A120HIS4_9PSED_Methylmalonate-semialdehyde_dehydrogenase_OS=Pseudomonas_monteilii_OX=76759_GN=APT63_03195_PE=4_SV=1~~~tr|A0A0Q8BKH6|A0A0Q8BKH6_9BURK_Methylmalonate-semialdehyde_dehydrogenase_OS=Achromobacter_sp._Root565_OX=1736564_GN=ASD71_18635_PE=4_SV=1~~~tr|A0A2N8KFM1|A0A2N8KFM1_9BURK_Methylmalonate-semialdehyde_dehydrogenase_(CoA_acylating)_OS=Achromobacter_pulmonis_OX=1389932…
3	n31623	1	0	39	1	15	0	0	3.78127e-08	0.00047463	0.706187	6.25023	CTCGGGCGACGAGAACAAGCGGCGGGAAACGCTGGCCCTGGGGGTGGAAAAGCTGGAAGTCGCCTATGCATG	72	tr|A0A2I8DIR1|A0A2I8DIR1_9BURK_PLD_phosphodiesterase_domain-containing_protein_OS=Achromobacter_sp._AONIH1_OX=1758194_GN=C2U31_11955_PE=4_SV=1~~~tr|A0A0L8ETB1|A0A0L8ETB1_9BURK_Chemotaxis_protein_(Fragment)_OS=Achromobacter_sp._DMS1_OX=1688405_GN=AD428_05280_PE=4_SV=1~~~tr|A0A658ACK7|A0A658ACK7_ALCXX_Glutathione_S-transferase_OS=Alcaligenes_xylosoxydans_xylosoxydans_OX=85698_GN=DAI43_10030_PE=4_SV…
3	n31638	1	0	39	1	15	0	0	3.78127e-08	0.00047463	0.706187	6.25023	CCTGGACGGACGTAGCCAAACGCTGGCCTCGGCTGTCCTCGGTGATCGAGCCTCACGCTATGACGCCGAGCGCCTTGCATCGAAGCTGGCA	91	tr|A0A0M7DWG9|A0A0M7DWG9_9BURK_Uncharacterized_protein_OS=Achromobacter_aegrifaciens_OX=1287736_GN=ERS370000_01002_PE=4_SV=1~~~tr|A0A424W6J0|A0A424W6J0_ALCXX_Uncharacterized_protein_OS=Alcaligenes_xylosoxydans_xylosoxydans_OX=85698_GN=DY367_25800_PE=4_SV=1~~~tr|A0A7D4IKB4|A0A7D4IKB4_9BURK_Uncharacterized_protein_OS=Achromobacter_pestifer_OX=1353889_GN=FOC84_22350_PE=4_SV=1~~~tr|A0A6S7AI14|A0A6S7A…
3	n31797	1	0	39	1	15	0	0	3.78127e-08	0.00047463	0.706187	6.25023	CCGCGCGCCGGCGCGGGAAACGCTGGCGGCCTGAGACCGCTATGCGGACAGGGCGGCAATCCTGCCGCCCTGTCCGCCATTAGGGATTCCCTCCACTTTGGGCCCGCCGAAGCCATGCTTAAGCATTTCTCAATAGGCAGGCTCAGGGGCTTGCGTCAGAGTTCTGCATCATGAA	175	tr|J4QIR6|J4QIR6_9BURK_Peptidase_S74_domain-containing_protein_OS=Achromobacter_marplatensis_OX=470868_GN=QWC_31351_PE=4_SV=1~~~tr|A0A0M7K248|A0A0M7K248_9BURK_Short_chain_dehydrogenase_OS=Achromobacter_aegrifaciens_OX=1287736_GN=ERS370000_04050_PE=4_SV=1~~~tr|A0A658ABQ9|A0A658ABQ9_ALCXX_Short_chain_dehydrogenase_OS=Alcaligenes_xylosoxydans_xylosoxydans_OX=85698_GN=DAI43_12135_PE=4_SV=1~~~tr|J4YJG…
3	n31938	1	0	39	1	15	0	0	3.78127e-08	0.00047463	0.706187	6.25023	CGCCCGCCGCAAACGCGCAGGACACCCCCCGGCTTCCAAGGAGCCCACCATGAA	54	tr|A0A446CM31|A0A446CM31_9BURK_Uncharacterized_protein_OS=Achromobacter_agilis_OX=1353888_GN=AGI3411_03907_PE=4_SV=1
3	n31958	1	0	39	1	15	0	0	3.78127e-08	0.00047463	0.706187	6.25023	GCGCACCGGCGTGGAGGCACGGTAAATGCCGATGGTGGGCCGGCCCAAGGCGGCCGACAGGTGGGTCAGACCGCTGTCCAACCCCACCATCAGGCGCGACCCAGCCAGCAAACGCGCCACCGCCGTCAGGTCCATGCGGGGCATCACCTCA	151	tr|A0A7D4HZW2|A0A7D4HZW2_9BURK_Lipopolysaccharide_heptosyltransferase_I_OS=Achromobacter_pestifer_OX=1353889_GN=waaC_PE=4_SV=1~~~tr|A0A6S7F6U4|A0A6S7F6U4_9BURK_Lipopolysaccharide_heptosyltransferase_1_OS=Achromobacter_insolitus_OX=217204_GN=rfaC_PE=4_SV=1~~~tr|A0A7X9W5C5|A0A7X9W5C5_9BURK_Lipopolysaccharide_heptosyltransferase_I_OS=Achromobacter_sp._Bel_OX=2727415_GN=waaC_PE=4_SV=1~~~tr|A0A095UXP9…
3	n31961	1	0	39	1	15	0	0	3.78127e-08	0.00047463	0.706187	6.25023	GCCCAGGTGGAAACGCGCCACCGCGTCCACCGGCATGCCGTTCTTCATGGACTGC	55	tr|A0A2S8VGW5|A0A2S8VGW5_9BURK_Malonyl-CoA_decarboxylase_OS=Achromobacter_sp._MYb9_OX=1827284_GN=CQ050_09420_PE=4_SV=1~~~tr|A0A7X9W7J3|A0A7X9W7J3_9BURK_Malonyl-CoA_decarboxylase_OS=Achromobacter_sp._Bel_OX=2727415_GN=HG262_28600_PE=4_SV=1~~~tr|A0A366G1W0|A0A366G1W0_9BURK_Malonyl-CoA_decarboxylase_OS=Achromobacter_marplatensis_OX=470868_GN=DFP87_104345_PE=4_SV=1~~~tr|J4YCW6|J4YCW6_9BURK_Malonyl-Co…
3	n32024	1	0	39	1	15	0	0	3.78127e-08	0.00047463	0.706187	6.25023	TCGTCGCCATCGCCAAATCCTGCTGCCCAACGTCCAGGGCTTGCAGGCTGTTTTCCCACTTCTGGAATGCCGCCTCTTGCGCATCACAAACGCGCTTCACCCAGGCATCCGAATCTTCCGCGCCGTAGAACTTCGCGGCCTCTGCCGCCGGGTTGCATTCAGGGAAAACGCGGGCGTGCGCCGTGTTCGCCAACGACAGCACGAACGCCCCAAAAAATACCGCTACGACAGCGGCCCACAATCTCGCCAAAAAATCTCTAACGTCCATCATGCTTCACCTCTATGTCAGGTTGAATTGACGGCTAGGAACGGTTGCCGCCGTC	323	tr|A0A0D5A0C3|A0A0D5A0C3_9BURK_Conjugal_transfer_protein_TraG_OS=Achromobacter_sp._LM16_OX=1449778_GN=pLM16A1_p17_PE=3_SV=1~~~tr|T2K1A4|T2K1A4_ACHDE_Conjugal_transfer_protein_TraG_OS=Achromobacter_denitrificans_OX=32002_GN=traG_PE=3_SV=1~~~tr|A0A2I8DU28|A0A2I8DU28_9BURK_Short-chain_dehydrogenase_OS=Achromobacter_sp._AONIH1_OX=1758194_GN=C2U31_20275_PE=4_SV=1
3	n32192	1	0	39	1	15	0	0	3.78127e-08	0.00047463	0.706187	6.25023	CGGAGGCAAGGCGTATTGCCAGATCCGCTCGGAAACGCGTACGCCGTCCTCCATCAAGGCGATGTCCAACCTGAGGCGGCCGCCGGCGGGCAGCCAGGCAGGCGAAGCGCTTTCAGGCACGGCCAGAAGGCTG	133	tr|A0A446C2C5|A0A446C2C5_9BURK_Biofilm_growth-associated_repressor_OS=Achromobacter_agilis_OX=1353888_GN=bigR_PE=4_SV=1~~~tr|A0A246QAX7|A0A246QAX7_9BURK_Histidine_kinase_OS=Achromobacter_sp._HZ28_OX=2015171_GN=CEY04_12085_PE=4_SV=1~~~tr|A0A6J4ZRE7|A0A6J4ZRE7_9BURK_Uncharacterized_protein_OS=Achromobacter_insuavis_OX=1287735_GN=LMG26845_00386_PE=4_SV=1~~~tr|A0A0M7MKR5|A0A0M7MKR5_9BURK_Uncharacteri…
3	n32196	1	0	39	1	15	0	0	3.78127e-08	0.00047463	0.706187	6.25023	GTTCGGACGCCGGCAAACGCGTACGGGCTGCGGACATTGCCATTCCTGCCGATGTGCCCGC	61	tr|A0A7D4E064|A0A7D4E064_9BURK_Uncharacterized_protein_OS=Achromobacter_pestifer_OX=1353889_GN=FOC84_26720_PE=4_SV=1~~~tr|A0A0M7JYY4|A0A0M7JYY4_9BURK_Uncharacterized_protein_OS=Achromobacter_aegrifaciens_OX=1287736_GN=ERS370000_03965_PE=4_SV=1~~~tr|E3HNN0|E3HNN0_ACHXA_Uncharacterized_protein_OS=Achromobacter_xylosoxidans_(strain_A8)_OX=762376_GN=AXYL_03749_PE=4_SV=1~~~tr|A0A446CI79|A0A446CI79_9BU…
3	n32208	1	0	39	1	15	0	0	3.78127e-08	0.00047463	0.706187	6.25023	GGGCTTGAGCAGATGCCGATACGGCGATCCTTGCGCATCGCGCTTGGCAGGACTGAAACGCGTCCCTTCAGCAAATACCATCACGCTGGTCGGCACCAGCGAGAAC	106	tr|A0A6S7AAX6|A0A6S7AAX6_9BURK_N6_N4_Mtase_domain-containing_protein_OS=Achromobacter_kerstersii_OX=1353890_GN=LMG3441_03973_PE=3_SV=1~~~tr|A0A424WBT3|A0A424WBT3_ALCXX_VWA_domain-containing_protein_OS=Alcaligenes_xylosoxydans_xylosoxydans_OX=85698_GN=DY367_16495_PE=4_SV=1~~~tr|A0A2S8VEH5|A0A2S8VEH5_9BURK_Acyltransferase_OS=Achromobacter_sp._MYb9_OX=1827284_GN=CQ050_11340_PE=4_SV=1~~~tr|A0A7X9ZE56…
3	n32276	1	0	39	1	15	0	0	3.78127e-08	0.00047463	0.706187	6.25023	TGCATGCGCCAAGACGTTGGGAATCGCGATCGCGTAGGCCGCCGCGATCAAGGCCATTCCGATGAGAAACGCGGAACTCCCGATAAGCGCGGCGACCAGCGCCGCACCTAGCGCCATCAGACCGATACCCAGCAGGACGAGGCGTTCGGACGCTACCCCCCGCCGCAGCAACGCCGTGTTGAGGGCTGCGCCGCACAGCGATGCCGCGGCCAGCGCCAGG	220	tr|A0A658A6L1|A0A658A6L1_ALCXX_MFS_transporter_OS=Alcaligenes_xylosoxydans_xylosoxydans_OX=85698_GN=DAI43_24740_PE=4_SV=1~~~tr|A0A0M7IXY6|A0A0M7IXY6_9BURK_Inner_membrane_transport_protein_ydhC_OS=Achromobacter_aegrifaciens_OX=1287736_GN=ydhC_PE=4_SV=1~~~tr|E3HRU4|E3HRU4_ACHXA_Major_facilitator_superfamily_protein_6_OS=Achromobacter_xylosoxidans_(strain_A8)_OX=762376_GN=AXYL_00245_PE=4_SV=1~~~tr|A…
3	n32317	1	0	39	1	15	0	0	3.78127e-08	0.00047463	0.706187	6.25023	CGTGGAAACAACATACTCGCGAAACGCGGCGTCTTCCATGGCCTGGACGATCGCGCGG	58	tr|A0A6S7F2J4|A0A6S7F2J4_9BURK_Uncharacterized_protein_OS=Achromobacter_insolitus_OX=217204_GN=LMG6000_01397_PE=3_SV=1~~~tr|A0A424WK52|A0A424WK52_ALCXX_Tripartite_tricarboxylate_transporter_substrate_binding_protein_OS=Alcaligenes_xylosoxydans_xylosoxydans_OX=85698_GN=DY367_00320_PE=3_SV=1~~~tr|A0A6S7EXY5|A0A6S7EXY5_9BURK_Uncharacterized_protein_OS=Achromobacter_anxifer_OX=1287737_GN=LMG26858_059…
3	n32375	1	0	39	1	15	0	0	3.78127e-08	0.00047463	0.706187	6.25023	CCTGCCCGTCATCGACAGGATTCACGAGGCTGGACTGCGCTACTGTCCGCATTTCCTTGGCGCGGGTGTCGGCCAGCTTGCGTCGGCGCACATTCTGGCGGCGCGAGGACGAACCGGCAGCATGCTTGAAATCGATGCCAACGAGAACCCGCTGCGCGCGGCCCTCAGCCCGGCGTTGGGCGTCATCATCGAAGGAGAGGCCAAGCTCGGAAACGCGGCGGGCCTGGGCGTGGAGCCGGATCTCGCGCAATTGCGCGAGATCT	263	tr|A0A658AE85|A0A658AE85_ALCXX_Mandelate_racemase_OS=Alcaligenes_xylosoxydans_xylosoxydans_OX=85698_GN=DAI43_09170_PE=4_SV=1~~~tr|A0A0M7K0A8|A0A0M7K0A8_9BURK_Mandelate_racemase_OS=Achromobacter_aegrifaciens_OX=1287736_GN=mdlA_PE=4_SV=1~~~tr|A0A424WGM8|A0A424WGM8_ALCXX_Mandelate_racemase/muconate_lactonizing_enzyme_family_protein_OS=Alcaligenes_xylosoxydans_xylosoxydans_OX=85698_GN=DY367_07925_PE=…
3	n32430	1	0	39	1	15	0	0	3.78127e-08	0.00047463	0.706187	6.25023	GGAAACGCGGGGCGATCCCCGGCATTCGCATTGACGC	37	tr|A0A848NDT7|A0A848NDT7_9BURK_Dihydroxy-acid_dehydratase_family_protein_OS=Achromobacter_ruhlandii_OX=72557_GN=HGQ98_03005_PE=4_SV=1~~~tr|A0A6S7ECM8|A0A6S7ECM8_9BURK_L-arabonate_dehydratase_OS=Achromobacter_ruhlandii_OX=72557_GN=araC_2_PE=3_SV=1~~~tr|A0A5K4YEP5|A0A5K4YEP5_ALCXX_Dihydroxy-acid_dehydratase_OS=Alcaligenes_xylosoxydans_xylosoxydans_OX=85698_GN=AL520_26610_PE=4_SV=1~~~tr|A0A0M7JPJ2|A…
3	n32449	1	0	39	1	15	0	0	3.78127e-08	0.00047463	0.706187	6.25023	AAAGGTCGAAACGTAACGCTCTGTGCCCGGCACGGACCCCAGGCTGCCGGGACCGGCACTA	61	tr|A0A0M7F1J6|A0A0M7F1J6_9BURK_Uncharacterized_protein_OS=Achromobacter_aegrifaciens_OX=1287736_GN=ERS370000_01512_PE=4_SV=1~~~tr|A0A658A5T9|A0A658A5T9_ALCXX_Uncharacterized_protein_OS=Alcaligenes_xylosoxydans_xylosoxydans_OX=85698_GN=DAI43_30370_PE=4_SV=1~~~tr|A0A6S7DPZ8|A0A6S7DPZ8_9BURK_Uncharacterized_protein_OS=Achromobacter_anxifer_OX=1287737_GN=LMG26858_02814_PE=4_SV=1
3	n32549	1	0	39	1	15	0	0	3.78127e-08	0.00047463	0.706187	6.25023	CATCCCAGATCCGGCTATCAAACGTCAGCGCGTCCTCGTTCAGCGCCCGGTTGCGAGCTTCGTACTCGCCC	71	tr|A0A6S6ZFY7|A0A6S6ZFY7_9BURK_L-lactate_dehydrogenase_OS=Achromobacter_deleyi_OX=1353891_GN=ldh_PE=3_SV=1~~~tr|A0A6S6ZT63|A0A6S6ZT63_9BURK_L-lactate_dehydrogenase_OS=Achromobacter_pestifer_OX=1353889_GN=ldh_PE=3_SV=1~~~tr|A0A7X9W770|A0A7X9W770_9BURK_Ldh_family_oxidoreductase_OS=Achromobacter_sp._Bel_OX=2727415_GN=HG262_28965_PE=3_SV=1~~~tr|A0A2I8DD11|A0A2I8DD11_9BURK_Lactate_dehydrogenase_OS=Ach…
3	n32576	1	0	39	1	15	0	0	3.78127e-08	0.00047463	0.706187	6.25023	GCGGGCCTCGCTCGGGCGGTCGGGCGTACGAAACGTCCCGATCCGCAGGCAGGCGACAGAC	61	tr|A0A0L8EV69|A0A0L8EV69_9BURK_Restriction_endonuclease_OS=Achromobacter_sp._DMS1_OX=1688405_GN=AD428_02620_PE=4_SV=1~~~tr|A0A6S6ZUN0|A0A6S6ZUN0_9BURK_Uronate_dehydrogenase_OS=Achromobacter_pestifer_OX=1353889_GN=udh_2_PE=4_SV=1~~~tr|A0A446C8C7|A0A446C8C7_9BURK_Uronate_dehydrogenase_OS=Achromobacter_agilis_OX=1353888_GN=udh_PE=4_SV=1~~~tr|A0A095VDA2|A0A095VDA2_9BURK_Epimerase_OS=Achromobacter_sp.…
3	n32606	1	0	39	1	15	0	0	3.78127e-08	0.00047463	0.706187	6.25023	GCAGCTTGGCGTCAACGGCGGAAACGTCTATCTGTCGGGGTCGGCCATCCAATACTGGCAA	61	tr|A0A0M7LLF5|A0A0M7LLF5_9BURK_Heat_shock_protein_E_OS=Achromobacter_aegrifaciens_OX=1287736_GN=htrE_1_PE=3_SV=1~~~tr|A0A366GCS2|A0A366GCS2_9BURK_Outer_membrane_usher_protein_OS=Achromobacter_marplatensis_OX=470868_GN=DFP87_1011243_PE=3_SV=1~~~tr|A0A424WJ39|A0A424WJ39_ALCXX_Fimbrial_biogenesis_outer_membrane_usher_protein_OS=Alcaligenes_xylosoxydans_xylosoxydans_OX=85698_GN=DY367_03040_PE=3_SV=1~…
3	n32667	1	0	39	1	15	0	0	3.78127e-08	0.00047463	0.706187	6.25023	CGGAGCACTTCATGAGCAAACGTCGCCATAACGGCCGCGCCGCACGCCTGCCATCGCGGGT	61	tr|A0A0M7EWP5|A0A0M7EWP5_9BURK_Ferrichrome_receptor_FcuA_OS=Achromobacter_aegrifaciens_OX=1287736_GN=fcuA_3_PE=3_SV=1~~~tr|A0A6S7F784|A0A6S7F784_9BURK_Ferric-anguibactin_receptor_FatA_OS=Achromobacter_insolitus_OX=217204_GN=fatA_2_PE=3_SV=1~~~tr|E3HWE2|E3HWE2_ACHXA_Ferric_anguibactin_receptor_2_OS=Achromobacter_xylosoxidans_(strain_A8)_OX=762376_GN=AXYL_05455_PE=3_SV=1~~~tr|A0A7Y4NL33|A0A7Y4NL33_…
3	n32770	1	0	39	1	15	0	0	3.78127e-08	0.00047463	0.706187	6.25023	CAGCTTGCCCGGATCGCTCAGGCTCTGGAAACGTTCGACCGAGATGAAGCCATCAATGGCC	61	tr|A0A2S8VL23|A0A2S8VL23_9BURK_Antibiotic_biosynthesis_monooxygenase_OS=Achromobacter_sp._MYb9_OX=1827284_GN=CQ050_01435_PE=4_SV=1~~~tr|A0A7X9ZEY1|A0A7X9ZEY1_9BURK_Antibiotic_biosynthesis_monooxygenase_OS=Achromobacter_sp._Bel_OX=2727415_GN=HG262_15960_PE=4_SV=1~~~tr|J4QV62|J4QV62_9BURK_Antibiotic_biosynthesis_monooxygenase_family_protein_1_OS=Achromobacter_marplatensis_OX=470868_GN=QWC_09571_PE=…
3	n32776	1	0	39	1	15	0	0	3.78127e-08	0.00047463	0.706187	6.25023	CTGCCAGCGGCGGTCGAAACGTTCGACGGCAAGCACCTTCACGTCTTCGAAGCTGAGTACT	61	tr|A0A4Q1HJJ2|A0A4Q1HJJ2_9BURK_Toxin_HipA_OS=Achromobacter_aloeverae_OX=1750518_GN=C7R54_17560_PE=3_SV=1~~~tr|A0A424WFL3|A0A424WFL3_ALCXX_Type_II_toxin-antitoxin_system_HipA_family_toxin_OS=Alcaligenes_xylosoxydans_xylosoxydans_OX=85698_GN=DY367_08855_PE=3_SV=1~~~tr|A0A0X8P244|A0A0X8P244_ALCXX_Type_II_toxin-antitoxin_system_HipA_family_toxin_OS=Alcaligenes_xylosoxydans_xylosoxydans_OX=85698_GN=AL…
3	n32781	1	0	39	1	15	0	0	3.78127e-08	0.00047463	0.706187	6.25023	CTCTCAGCGGGCCGTCTGGATCTCTTTGAAGGCGGCAAGGACGTCTGCCATTTCCGCCTGTGGCAGTTCGGCCGCGAAACGTTCGATATGGTCATAGGCGCGCTGCGCCACACCGGTCTCTTCGCCGATGCCGCGTATCATCGCGGACACCCGGGTCCGGTCGTAGCTGTATTCCGTGTGGTCGGTGTCCAGCCGCACTATCAGAGGTTCGCTCTCACCCTCCAGTTCCGCTTCGAGGCGGCAGGCCAGCAAGCCGAGAGCATCGTCGGCATGCAGCCGGATCCGCGGGATCAGGCTTGCCACGGCCGTGTCGCCGAATTGCGCCATATGCGCGATGGTTGGCGTTCCATGCAGCAAGGTCGTGGCAACGCAGAACTGCGTGCTCATGAGCGTTCCGGA…	1516	tr|A0A424WD49|A0A424WD49_ALCXX_ABC_transporter_ATP-binding_protein_OS=Alcaligenes_xylosoxydans_xylosoxydans_OX=85698_GN=DY367_13680_PE=4_SV=1~~~tr|A0A3R9GV33|A0A3R9GV33_ACHDE_ABC_transporter_ATP-binding_protein_OS=Achromobacter_denitrificans_OX=32002_GN=FOC81_03985_PE=4_SV=1~~~tr|A0A5N7ZKT2|A0A5N7ZKT2_9BURK_ABC_transporter_ATP-binding_protein_OS=Achromobacter_sp._OX=134375_GN=E2603_07535_PE=4_SV=…
3	n32822	1	0	39	1	15	0	0	3.78127e-08	0.00047463	0.706187	6.25023	GACGCCGTTGAGCACCGCGTTGGCGCCGAAACGTTTGTGGATGTTGGAGACTTCAACGAGC	61	tr|A0A0M7MJH8|A0A0M7MJH8_9BURK_Lipopolysaccharide_export_system_ATP-binding_protein_LptB_OS=Achromobacter_aegrifaciens_OX=1287736_GN=lptB_26_PE=4_SV=1~~~tr|A0A2T5CY18|A0A2T5CY18_ALCXX_ABC_transporter_ATP-binding_protein_OS=Alcaligenes_xylosoxydans_xylosoxydans_OX=85698_GN=DAI43_02125_PE=4_SV=1~~~tr|A0A4Q1HKT0|A0A4Q1HKT0_9BURK_Nodulation_protein_OS=Achromobacter_aloeverae_OX=1750518_GN=C7R54_13440…
3	n33033	1	0	39	1	15	0	0	3.78127e-08	0.00047463	0.706187	6.25023	CCGCCAAACGGAATTTGAAAGGCCCGATCAACCCAGTATCTGCCCCAGGAAGGCCTGCGCGCGTTCGGTGCGC	73	tr|A0A5N7ZLF3|A0A5N7ZLF3_9BURK_Amino_acid_ABC_transporter_ATP-binding_protein_OS=Achromobacter_sp._OX=134375_GN=E2603_12325_PE=3_SV=1~~~tr|A0A6N0JFX3|A0A6N0JFX3_ACHDE_Amino_acid_ABC_transporter_ATP-binding_protein_OS=Achromobacter_denitrificans_OX=32002_GN=FOC81_03945_PE=3_SV=1~~~tr|A0A095UMC1|A0A095UMC1_9BURK_Glutamine_ABC_transporter_ATP-binding_protein_OS=Achromobacter_sp._RTa_OX=1532557_GN=gl…
3	n33200	1	0	39	1	15	0	0	3.78127e-08	0.00047463	0.706187	6.25023	GTGGTAGGACAGCGTAAACGGCACCACCCGCCCCGGATGCACGGTGAAGCGCGCCGTGGTG	61	tr|A0A7U0E5Q1|A0A7U0E5Q1_ALCXX_Glycoside_hydrolase_family_15_protein_OS=Alcaligenes_xylosoxydans_xylosoxydans_OX=85698_GN=I6I48_28205_PE=4_SV=1~~~tr|A0A0D6IDP6|A0A0D6IDP6_ALCXX_Glycoside_hydrolase_family_15_protein_OS=Alcaligenes_xylosoxydans_xylosoxydans_OX=85698_GN=ERS451415_04533_PE=4_SV=1~~~tr|A0A1R1JK64|A0A1R1JK64_ALCXX_Glucoamylase_OS=Alcaligenes_xylosoxydans_xylosoxydans_OX=85698_GN=BIZ92_…
3	n33245	1	0	39	1	15	0	0	3.78127e-08	0.00047463	0.706187	6.25023	ACGCATGCGCGTGCCCGACGATCCGCATCCAAACGGCAGATCCACCGTCTGGCTCGACCCGCGC	64	tr|A0A6S6YJB4|A0A6S6YJB4_9BURK_Uncharacterized_protein_OS=Achromobacter_pestifer_OX=1353889_GN=LMG3431_00572_PE=4_SV=1~~~tr|A0A7Y4K4T4|A0A7Y4K4T4_9BURK_PepSY_domain-containing_protein_OS=Achromobacter_deleyi_OX=1353891_GN=HLG70_04505_PE=4_SV=1~~~tr|A0A446CFW3|A0A446CFW3_9BURK_Uncharacterized_protein_OS=Achromobacter_agilis_OX=1353888_GN=AGI3411_02723_PE=4_SV=1~~~tr|H0F838|H0F838_9BURK_PepSY-assoc…
3	n33322	1	0	39	1	15	0	0	3.78127e-08	0.00047463	0.706187	6.25023	AGCCAAACGGCCCAGAATCTGGATATGAGCGCCGAGCGGCTGTCCGCGTGGCAGAAGGCGG	61	tr|A0A446CEZ2|A0A446CEZ2_9BURK_Histidinol-phosphatase_OS=Achromobacter_agilis_OX=1353888_GN=hisN_PE=3_SV=1~~~tr|A0A446CL28|A0A446CL28_9BURK_Histidinol-phosphatase_OS=Achromobacter_veterisilvae_OX=2069367_GN=hisN_1_PE=3_SV=1~~~tr|A0A0M7GTH8|A0A0M7GTH8_9BURK_Phage_lysozyme2_domain-containing_protein_OS=Achromobacter_aegrifaciens_OX=1287736_GN=ERS370000_02365_PE=4_SV=1~~~tr|A0A424WAQ8|A0A424WAQ8_ALC…
3	n33409	1	0	39	1	15	0	0	3.78127e-08	0.00047463	0.706187	6.25023	GGATTATCTCTACGACAAGCGCGACCCGGCTTCGGGGTGGCGCCGCTCCGATGCGGGCGTGCACACGGAAACGGCCGAAGCGCCTTTGGCGAGAGCCGTCGGCGCCGCGTAGCGTGGCGCGCCGTATTTAATCAGATACCGTTCCTGCGTTGGCTCAGCGGCTGGCGCAGCTACATCTGCATCTTCTTCTTGCCCAATAGCGTCAGCGCCAGGCTGCGGCCGGTGCGCATGAAGGGGTAAAGCGCCGTCGACAGGCATGGGTTGCGGAACACGGCCGCGTTGACGCTGTTGAACAGGTCGTTGCCGGTGCTGATCAGCGCCAGGCGGTTGATGCAG	336	tr|A0A3C1XZR6|A0A3C1XZR6_9BURK_Propionate--CoA_ligase_OS=Achromobacter_sp._OX=134375_GN=DCR74_13790_PE=3_SV=1~~~tr|A0A2S0I4D8|A0A2S0I4D8_9BURK_Propionate--CoA_ligase_OS=Achromobacter_spanius_OX=217203_GN=CLM73_06645_PE=3_SV=1~~~tr|A0A6S6ZQY5|A0A6S6ZQY5_9BURK_Acetyl-coenzyme_A_synthetase_OS=Achromobacter_animicus_OX=1389935_GN=acsA_3_PE=3_SV=1~~~tr|A0A2N8KFL8|A0A2N8KFL8_9BURK_Propionate--CoA_ligas…
3	n33422	1	0	39	1	15	0	0	3.78127e-08	0.00047463	0.706187	6.25023	GCGAGTGCTCATCGCGTTGGAAACGGCCGAGGGCATGAAGCGCAATTGGTCGGGGTTCAAC	61	tr|A0A366G708|A0A366G708_9BURK_Uncharacterized_protein_OS=Achromobacter_marplatensis_OX=470868_GN=DFP87_102432_PE=4_SV=1~~~tr|J4YNE7|J4YNE7_9BURK_Uncharacterized_protein_OS=Achromobacter_marplatensis_OX=470868_GN=QWC_08661_PE=4_SV=1~~~tr|A0A2S8VLI1|A0A2S8VLI1_9BURK_Uncharacterized_protein_OS=Achromobacter_sp._MYb9_OX=1827284_GN=CQ050_02300_PE=4_SV=1~~~tr|A0A7X9W156|A0A7X9W156_9BURK_Uncharacterize…
3	n33469	1	0	39	1	15	0	0	3.78127e-08	0.00047463	0.706187	6.25023	CCTGGCGGTGCTGGTGGTGCTGGCGGGGGCGTAGGCCACGCCGGCGCCGAGCCTCAGGCATTTGCGCACTGCGTCAGGGAACCATGGCCGATTGCGTCCTGGCTTTGTGCGTATTGGCCAAACGCGTCCAGCGGCATGGGCCGCCCATGGTAGTAGCCCTGGGTCACGTGCACGCCCAATGCGCGCACCATCTCGTGCTCTTCCCTGGTTTCGATGCCCTCGGCGACCACCGTCATGTCCAGCGATCGCGCCATCTCGACGGTGCATGCCAGGATGCTTTGGGCATAACCCAACCGGCCGGCGCTGGCGATCAGGCCGCGGTCGATCTTGAGTTCATCGAAGGGCGCGCAAAGCAGCCGGTCGAGCGACGAGTCGCCGGTGCCGAAATCATCGATTGCG…	1545	tr|A0A109Q4S0|A0A109Q4S0_9PSED_Histidine_kinase_OS=Pseudomonas_monteilii_OX=76759_GN=APT63_14210_PE=4_SV=1~~~tr|J4PIA3|J4PIA3_9BURK_EAL_domain-containing_protein_2_OS=Achromobacter_marplatensis_OX=470868_GN=QWC_00960_PE=4_SV=1~~~tr|A0A366GBU9|A0A366GBU9_9BURK_EAL_domain-containing_protein_(Putative_c-di-GMP-specific_phosphodiesterase_class_I)_OS=Achromobacter_marplatensis_OX=470868_GN=DFP87_10182…
3	n33496	1	0	39	1	15	0	0	3.78127e-08	0.00047463	0.706187	6.25023	TCAGGCCGCAAGCTGGCAAGGCACGCGCGACGCAAACGGCTTCCGCGGTATCTGGACTGACGCCGGCAACGGCAAGCAGCTACGCTTCGACCTGAAGCGGGTCGCGCAGTACGACACCGGGCAGCTGGAAAAGGACCGCAAGCTGGCCCG	150	tr|A0A811GS10|A0A811GS10_9BURK_Acetyl-CoA:oxalate_CoA-transferase_OS=Achromobacter_mucicolens_OX=1389922_GN=yfdE_2_PE=4_SV=1~~~tr|A0A8B5V2N3|A0A8B5V2N3_9BURK_Formyl-CoA_transferase_OS=Achromobacter_sp._SLBN-14_OX=2768442_GN=FBY20_4602_PE=4_SV=1~~~tr|A0A854PVT5|A0A854PVT5_9BURK_Formyl-CoA_transferase_OS=Achromobacter_sp._KAs_3-5_OX=1915388_GN=BMR85_012520_PE=4_SV=1~~~tr|A0A0M7CAU5|A0A0M7CAU5_9BURK…
3	n33511	1	0	39	1	15	0	0	3.78127e-08	0.00047463	0.706187	6.25023	CGTTGATCATGCCGAAACGGCTGCCGTTCATGGCATCGGGACCACCGCTGATCTTGTTGTAGCCGATA	68	tr|A0A7Y4NLH7|A0A7Y4NLH7_9BURK_Microcystinase_C_OS=Achromobacter_deleyi_OX=1353891_GN=HLG70_14565_PE=3_SV=1~~~tr|A0A0Q8XBX3|A0A0Q8XBX3_9BURK_Porin_OS=Achromobacter_sp._Root83_OX=1736602_GN=ASE30_26310_PE=4_SV=1~~~tr|A0A1N7PGE7|A0A1N7PGE7_9BURK_Outer_membrane_protein_(Porin)_OS=Achromobacter_sp._MFA1_R4_OX=1881016_GN=SAMN05428937_0800_PE=4_SV=1~~~tr|A0A6S7EHP4|A0A6S7EHP4_9BURK_Outer_membrane_porin…
3	n33522	1	0	39	1	15	0	0	3.78127e-08	0.00047463	0.706187	6.25023	CTTCTGGAAATCGGCGAAACGGCTGCGCACGCCGGTCAGCAGGTCCGTGGCGCCCTTCAAG	61	tr|A0A2I8DK64|A0A2I8DK64_9BURK_Methyl-accepting_chemotaxis_protein_OS=Achromobacter_sp._AONIH1_OX=1758194_GN=C2U31_18105_PE=4_SV=1~~~tr|A0A0D6HEV7|A0A0D6HEV7_ALCXX_Aspartate_chemoreceptor_protein_OS=Alcaligenes_xylosoxydans_xylosoxydans_OX=85698_GN=tar_3_PE=4_SV=1~~~tr|A0A6J5HYR4|A0A6J5HYR4_9BURK_Methyl-accepting_chemotaxis_protein_II_OS=Achromobacter_insuavis_OX=1287735_GN=tar_2_PE=4_SV=1~~~tr|A…
3	n33597	1	0	39	1	15	0	0	3.78127e-08	0.00047463	0.706187	6.25023	GCACTGTCGTGCTGAGGCAAACGGCGACGGCAGATGTGCTGTGATGCGCGAGTCCGGAGGAAATCGAGGTATGCCAGC	78	tr|A0A6S6ZI23|A0A6S6ZI23_9BURK_HTH-type_transcriptional_regulator_PgrR_OS=Achromobacter_animicus_OX=1389935_GN=pgrR_4_PE=3_SV=1~~~tr|A0A6J5B742|A0A6J5B742_9BURK_Glycogen_synthase_OS=Achromobacter_insuavis_OX=1287735_GN=glgA_PE=3_SV=1~~~tr|A0A0M7CAT9|A0A0M7CAT9_9BURK_Glycogen_synthase_OS=Achromobacter_sp._OX=134375_GN=glgA_1_PE=3_SV=1~~~tr|A0A1N7P135|A0A1N7P135_9BURK_Site-specific_recombinase_XerD…
3	n33612	1	0	39	1	15	0	0	3.78127e-08	0.00047463	0.706187	6.25023	CGCGCTGGGCGTCAAGGAAACGGCGCTGGTTCTGAACCTGGTGCGCAAGCTGCGCGAAGAG	61	tr|A0A6S7DLS9|A0A6S7DLS9_9BURK_Aconitate_hydratase_OS=Achromobacter_dolens_OX=1287738_GN=citB_2_PE=3_SV=1~~~tr|A0A0M7GF96|A0A0M7GF96_9BURK_Aconitate_hydratase_OS=Achromobacter_sp._OX=134375_GN=acn_PE=3_SV=1~~~tr|A0A6J5BLI7|A0A6J5BLI7_9BURK_Aconitate_hydratase_OS=Achromobacter_insuavis_OX=1287735_GN=acnA_PE=3_SV=1~~~tr|A0A120LGV0|A0A120LGV0_ALCXX_Aconitate_hydratase_OS=Alcaligenes_xylosoxydans_xyl…
3	n33846	1	0	39	1	15	0	0	3.78127e-08	0.00047463	0.706187	6.25023	CGATGAAACGGTCGGCGCCGAACATCTGCAACTGCTGCGCCGACAGGTAGGACAGCACCAC	61	tr|A0A424W951|A0A424W951_ALCXX_ABC_transporter_permease_OS=Alcaligenes_xylosoxydans_xylosoxydans_OX=85698_GN=DY367_21205_PE=3_SV=1~~~tr|A0A658ACZ8|A0A658ACZ8_ALCXX_ABC_transporter_permease_OS=Alcaligenes_xylosoxydans_xylosoxydans_OX=85698_GN=DAI43_22545_PE=3_SV=1~~~tr|A0A6S7F2C2|A0A6S7F2C2_9BURK_Uncharacterized_protein_OS=Achromobacter_insolitus_OX=217204_GN=LMG6000_02829_PE=3_SV=1~~~tr|A0A7D4IH3…
3	n34010	1	0	39	1	15	0	0	3.78127e-08	0.00047463	0.706187	6.25023	CGCGCTGCGCGAGACGATCCGGGTGTTCCGTCTTACCGGGCAGCAGTAAACGGGAACGGGCGGTGTTACGCGCCGCCCGGCATCCACCACCAGTCCAGTCCTATTTGCCCGCCAGAGC	118	tr|A0A2S5GM45|A0A2S5GM45_9BURK_Chemotaxis_protein_OS=Achromobacter_spanius_OX=217203_GN=C4E15_22585_PE=4_SV=1~~~tr|A0A6S7EV51|A0A6S7EV51_9BURK_Aerotaxis_receptor_OS=Achromobacter_ruhlandii_OX=72557_GN=aer_2_PE=4_SV=1~~~tr|A0A6S7EPX8|A0A6S7EPX8_9BURK_Aerotaxis_receptor_OS=Achromobacter_piechaudii_OX=72556_GN=aer_PE=4_SV=1~~~tr|D4XBY9|D4XBY9_9BURK_PAS_domain_S-box_protein_OS=Achromobacter_piechaudi…
3	n34047	1	0	39	1	15	0	0	3.78127e-08	0.00047463	0.706187	6.25023	CAGGAACACGTCTAGATCCTCGATCGAGATTTCGGAAGAAATTCTGCGGCGGATCAGAAACGGGCAATACCTGCCCGGCGATGCCTTG	88	tr|A0A2I8DSH1|A0A2I8DSH1_9BURK_GntR_family_transcriptional_regulator_OS=Achromobacter_sp._AONIH1_OX=1758194_GN=C2U31_23025_PE=4_SV=1~~~tr|A0A0M7FII7|A0A0M7FII7_9BURK_Uncharacterized_HTH-type_transcriptional_regulator_ydfH_OS=Achromobacter_aegrifaciens_OX=1287736_GN=ydfH_3_PE=4_SV=1~~~tr|A0A6S7DZ35|A0A6S7DZ35_9BURK_HTH-type_transcriptional_repressor_RspR_OS=Achromobacter_anxifer_OX=1287737_GN=rspR…
3	n34256	1	0	39	1	15	0	0	3.78127e-08	0.00047463	0.706187	6.25023	TTTCGGGGTAGACGTCCGCGGCATTGCCCAACAGGCCGACCGAAACGGGTTCGCGGCGGGCCTGTGCCGCCTGGATCAACTCCAGGGCTTCGTCCAGGGTGTCGGCGCGC	110	tr|J4YBQ8|J4YBQ8_9BURK_FecR_family_protein_OS=Achromobacter_marplatensis_OX=470868_GN=QWC_26523_PE=4_SV=1~~~tr|A0A7X9W7D6|A0A7X9W7D6_9BURK_DUF4880_domain-containing_protein_OS=Achromobacter_sp._Bel_OX=2727415_GN=HG262_28145_PE=4_SV=1~~~tr|A0A7T4E5N0|A0A7T4E5N0_9BURK_Urocanate_hydratase_OS=Achromobacter_deleyi_OX=1353891_GN=I6I07_10665_PE=4_SV=1~~~tr|A0A1R1JQA0|A0A1R1JQA0_ALCXX_Urocanate_hydratase…
3	n34267	1	0	39	1	15	0	0	3.78127e-08	0.00047463	0.706187	6.25023	ATCGAGCTGCACGTCGAAGAAACGGGTGACGGGCTGGCCGATCAGGCCGGCGGGATTGCGC	61	tr|A0A2S8VEE5|A0A2S8VEE5_9BURK_Sigma-54-dependent_Fis_family_transcriptional_regulator_OS=Achromobacter_sp._MYb9_OX=1827284_GN=CQ050_12070_PE=4_SV=1~~~tr|A0A448C2Z7|A0A448C2Z7_9BURK_Acetoin_catabolism_regulatory_protein_OS=Achromobacter_spanius_OX=217203_GN=acoR_1_PE=4_SV=1~~~tr|A0A3Q9KP28|A0A3Q9KP28_9BURK_Sigma-54-dependent_Fis_family_transcriptional_regulator_OS=Achromobacter_spanius_OX=217203_…
3	n34291	1	0	39	1	15	0	0	3.78127e-08	0.00047463	0.706187	6.25023	CGACCTTCTGGCGCAACGAGTAGGAGCGCGTCAAAAGTGACGGGCCCTCTAGTGGCGGCCTGAAATGTCGATTCCGTTATGGCTTCAATTGCCCAAACGGGGAAGTCGTTGGTCGCTGGGCGTCGTACACACGCTGGGCGTGTAGGGACGGCTGCGCCATGCCGAGA	167	tr|A0A424W7E7|A0A424W7E7_ALCXX_Colanic_acid_biosynthesis_glycosyltransferase_WcaI_OS=Alcaligenes_xylosoxydans_xylosoxydans_OX=85698_GN=wcaI_PE=4_SV=1~~~tr|A0A514CVB0|A0A514CVB0_9CAUD_Putative_DNA_helicase_OS=Achromobacter_phage_vB_AxyS_19-32_Axy19_OX=2591053_GN=Axy19_002_PE=4_SV=1~~~tr|A0A514CV46|A0A514CV46_9CAUD_Putative_DNA_helicase_OS=Achromobacter_phage_vB_AxyS_19-32_Axy18_OX=2591052_GN=Axy18…
3	n34394	1	0	39	1	15	0	0	3.78127e-08	0.00047463	0.706187	6.25023	TCGGCGAACTGCCGGTGGTGGACGGCTTTACCAGCGAAATAAAGACCGGTGAACTGGTTGCCCTGGTGGGC	71	tr|A0A246Q8U2|A0A246Q8U2_9BURK_Branched-chain_amino_acid_ABC_transporter_ATP-binding_protein_OS=Achromobacter_sp._HZ28_OX=2015171_GN=CEY04_08255_PE=4_SV=1~~~tr|A0A7D4E1A8|A0A7D4E1A8_9BURK_ABC_transporter_ATP-binding_protein_OS=Achromobacter_pestifer_OX=1353889_GN=FOC84_29845_PE=4_SV=1~~~tr|A0A424WBZ4|A0A424WBZ4_ALCXX_ABC_transporter_ATP-binding_protein_OS=Alcaligenes_xylosoxydans_xylosoxydans_OX=…
3	n34478	1	0	39	1	15	0	0	3.78127e-08	0.00047463	0.706187	6.25023	ATCCATGGTTATCTTTGCAAATAACGCAACCCTACGTTGCGATAAAGACCAATTCATTGAA	61	tr|A0A446CFU6|A0A446CFU6_9BURK_Uncharacterized_protein_OS=Achromobacter_veterisilvae_OX=2069367_GN=AVE30378_02237_PE=3_SV=1~~~tr|A0A4Q1HJH2|A0A4Q1HJH2_9BURK_Uncharacterized_protein_OS=Achromobacter_aloeverae_OX=1750518_GN=C7R54_14780_PE=3_SV=1
3	n34536	1	0	39	1	15	0	0	3.78127e-08	0.00047463	0.706187	6.25023	GCGCTCAATCCCATCTCAACTGCCTTGGGCCGTGACGGGGTCGTCAAAGAAATAATCGCGCCAACTGGCCGGCGCATTCTTGATCGCG	88	tr|A0A7Y4K319|A0A7Y4K319_9BURK_AdeC/AdeK/OprM_family_multidrug_efflux_complex_outer_membrane_factor_OS=Achromobacter_deleyi_OX=1353891_GN=adeC_PE=3_SV=1~~~tr|A0A4Q1HGS1|A0A4Q1HGS1_9BURK_Nitrate_ABC_transporter_substrate-binding_protein_OS=Achromobacter_aloeverae_OX=1750518_GN=C7R54_16890_PE=4_SV=1~~~tr|A0A0L8ETR0|A0A0L8ETR0_9BURK_Nitrate_ABC_transporter_substrate-binding_protein_OS=Achromobacter_…
3	n34682	1	0	39	1	15	0	0	3.78127e-08	0.00047463	0.706187	6.25023	GCTGACGAAGGCCAGGGTTGTCAGGAAATAAGGGTTGCCGGTGGCGCGGGCGATGCTGCGA	61	tr|A0A7Y4KCI6|A0A7Y4KCI6_9BURK_FadR_family_transcriptional_regulator_OS=Achromobacter_deleyi_OX=1353891_GN=HLG70_28140_PE=4_SV=1~~~tr|A0A0Q8X422|A0A0Q8X422_9BURK_GntR_family_transcriptional_regulator_OS=Achromobacter_sp._Root83_OX=1736602_GN=ASE30_10605_PE=4_SV=1~~~tr|A0A0Q8BTD1|A0A0Q8BTD1_9BURK_GntR_family_transcriptional_regulator_OS=Achromobacter_sp._Root565_OX=1736564_GN=ASD71_03430_PE=4_SV=1…
3	n34708	1	0	39	1	15	0	0	3.78127e-08	0.00047463	0.706187	6.25023	TAAATACAATACAAGAAGACCCGAAGGTACTCGCAACGCGGACGCCATGCGTGCCGAGGGC	61	tr|A0A7X9VXE0|A0A7X9VXE0_9BURK_Aconitate_hydratase_OS=Achromobacter_sp._Bel_OX=2727415_GN=acnD_PE=3_SV=1~~~tr|A0A366FNX1|A0A366FNX1_9BURK_Aconitate_hydratase_OS=Achromobacter_marplatensis_OX=470868_GN=DFP87_11130_PE=3_SV=1~~~tr|A0A6S7BEN2|A0A6S7BEN2_9BURK_Aconitate_hydratase_OS=Achromobacter_kerstersii_OX=1353890_GN=acnD_PE=3_SV=1~~~tr|J4QY27|J4QY27_9BURK_Aconitate_hydratase_OS=Achromobacter_marp…
3	n34842	1	0	39	1	15	0	0	3.78127e-08	0.00047463	0.706187	6.25023	GCCCAGGCGGTCCAGGATTTCCAGGCTGCGGCGCGAAATACAGGCCGCGCGGCTGCCCTCGCAGACCGAGTCGTCGGCC	79	tr|A0A2I8DBH8|A0A2I8DBH8_9BURK_FAD-dependent_oxidoreductase_OS=Achromobacter_sp._AONIH1_OX=1758194_GN=C2U31_00170_PE=4_SV=1~~~tr|A0A176XTJ0|A0A176XTJ0_ALCXX_FAD-dependent_oxidoreductase_OS=Alcaligenes_xylosoxydans_xylosoxydans_OX=85698_GN=A7J67_03075_PE=4_SV=1~~~tr|A0A8B5V0I4|A0A8B5V0I4_9BURK_3-(3-hydroxy-phenyl)propionate_hydroxylase_OS=Achromobacter_sp._SLBN-14_OX=2768442_GN=FBY20_3072_PE=4_SV=…
3	n34981	1	0	39	1	15	0	0	3.78127e-08	0.00047463	0.706187	6.25023	GTCTGGAATGGAATAAATACCGAAGCACGGGCGGCTTGGGTACGATAGCCGCCTCTTGCGG	61	tr|A0A446CBF6|A0A446CBF6_9BURK_Microcystinase_C_OS=Achromobacter_veterisilvae_OX=2069367_GN=AVE30378_01337_PE=3_SV=1~~~tr|A0A658AHT8|A0A658AHT8_ALCXX_LysR_family_transcriptional_regulator_OS=Alcaligenes_xylosoxydans_xylosoxydans_OX=85698_GN=DAI43_09755_PE=3_SV=1
3	n35218	1	0	39	1	15	0	0	3.78127e-08	0.00047463	0.706187	6.25023	AGAAATACGAACCCATCCCATGGCGCGGCTTCGGCGTCACGCGGGCCGAGGACAGCGTCAT	61	tr|A0A854PW22|A0A854PW22_9BURK_Uncharacterized_protein_OS=Achromobacter_sp._KAs_3-5_OX=1915388_GN=BMR85_024895_PE=4_SV=1~~~tr|A0A7Y4K9G0|A0A7Y4K9G0_9BURK_Class_II_aldolase/adducin_family_protein_OS=Achromobacter_deleyi_OX=1353891_GN=HLG70_14915_PE=4_SV=1~~~tr|J4QT59|J4QT59_9BURK_Class_II_aldolase_and_adducin_N-terminal_domain-containing_protein_3_OS=Achromobacter_marplatensis_OX=470868_GN=QWC_109…
3	n35314	1	0	39	1	15	0	0	3.78127e-08	0.00047463	0.706187	6.25023	GCCATCCCACTCCCACTTGCCGCGCCAGCGCGCCGCGTCGTAGTAATCTTGGGGACGGGTCCAGAAGACGTTGACCGTGACCATATAGATACGGCCGAATCGGCCCTGCTCTATTGCCTTCTTCAGCAATTGCAGCGTCGCGTTACGCCGGTTTTGCTTTACGACGAAGAGCCGTACACCGGCCTCGTCACAAGCCTTGACCATGCGTTTGCCATCTTCCCAGCGTGTGGCCATGGGCTTTTCGCTGACGACGTGGCGACCAGACTGGGCGACTTCGATGGCCTGCCAAGGATGCAGACCAGATGGAGTGGCGAGGATTACCGCGTCAGCGGTGCTCTGCGCGAGCATCTCGGTGAGTGAAGCTAAGGCCTGGCGCCGGTGGCTTCAGCCGCCGCTTTC…	528	tr|A0A366F8W5|A0A366F8W5_9BURK_N-6_DNA_methylase_OS=Achromobacter_marplatensis_OX=470868_GN=DFP87_1245_PE=4_SV=1~~~tr|A0A0X8BW29|A0A0X8BW29_9PSED_Glucose-fructose_oxidoreductase_OS=Pseudomonas_monteilii_OX=76759_GN=APT63_09220_PE=4_SV=1~~~tr|F7SYX1|F7SYX1_9BURK_Oxidoreductase_OS=Achromobacter_insuavis_AXX-A_OX=1003200_GN=AXXA_09373_PE=4_SV=1~~~tr|J4YR67|J4YR67_9BURK_Oxidoreductase_OS=Achromobacte…
3	n35388	1	0	39	1	15	0	0	3.78127e-08	0.00047463	0.706187	6.25023	AAATACGTATACGTACTATATTGGCGGATCCGGAGAAGCGCAAGGTTTCCTCGCCATCTCCGACTTTGCGCACGCCTGCGCCTACAATCGCCAGGCGTATTCCTTGGAAGCCCGATGACCGCCAACGCCAG	131	tr|A0A0D6I1T2|A0A0D6I1T2_ALCXX_Manganese_catalase_OS=Alcaligenes_xylosoxydans_xylosoxydans_OX=85698_GN=ERS451415_03841_PE=3_SV=1~~~tr|A0A0M7LMV7|A0A0M7LMV7_ALCXX_Manganese_catalase_OS=Alcaligenes_xylosoxydans_xylosoxydans_OX=85698_GN=ERS369984_05526_PE=3_SV=1~~~tr|A0A5K4YD22|A0A5K4YD22_ALCXX_Mn-containing_catalase_OS=Alcaligenes_xylosoxydans_xylosoxydans_OX=85698_GN=AL520_15735_PE=4_SV=1~~~tr|A0A…
3	n35390	1	0	39	1	15	0	0	3.78127e-08	0.00047463	0.706187	6.25023	AACAGGCCCTCAGCCTCAAGGTTGTAAATACGTCCCCAATTTAGTGCATCTGGGCGACAGC	61	tr|A0A7D4IAQ9|A0A7D4IAQ9_9BURK_Peptidase_OS=Achromobacter_pestifer_OX=1353889_GN=FOC84_23000_PE=4_SV=1~~~tr|A0A658AEZ2|A0A658AEZ2_ALCXX_tRNA_(guanine-N(7)-)-methyltransferase_OS=Alcaligenes_xylosoxydans_xylosoxydans_OX=85698_GN=trmB_PE=3_SV=1
3	n35556	1	0	39	1	15	0	0	3.78127e-08	0.00047463	0.706187	6.25023	GATCATGTACCTGGGCAAGATCGTGGAAATATCCACGTCGGCCGAGATCTTCGCGCGCGCC	61	tr|A0A6S7CPM6|A0A6S7CPM6_9BURK_Glutathione_import_ATP-binding_protein_GsiA_OS=Achromobacter_anxifer_OX=1287737_GN=gsiA_3_PE=4_SV=1~~~tr|A0A0M7CE88|A0A0M7CE88_ALCXX_Glutathione_import_ATP-binding_protein_GsiA_OS=Alcaligenes_xylosoxydans_xylosoxydans_OX=85698_GN=gsiA_9_PE=4_SV=1~~~tr|A0A6S7FFX6|A0A6S7FFX6_9BURK_Glutathione_import_ATP-binding_protein_GsiA_OS=Achromobacter_insolitus_OX=217204_GN=gsiA…
3	n35581	1	0	39	1	15	0	0	3.78127e-08	0.00047463	0.706187	6.25023	CGGATCCCAAATATCCCGTCAGGTCTGTGGTCGCGGCGTCTGCAGGATCGACAAACTTGTCC	62	tr|A0A246Q2U3|A0A246Q2U3_9BURK_Uncharacterized_protein_OS=Achromobacter_sp._HZ28_OX=2015171_GN=CEY04_22140_PE=4_SV=1~~~tr|A0A0M7JSZ4|A0A0M7JSZ4_9BURK_Putative_aliphatic_sulfonates-binding_protein_OS=Achromobacter_aegrifaciens_OX=1287736_GN=ssuA_4_PE=3_SV=1~~~tr|A0A658AAL3|A0A658AAL3_ALCXX_Aliphatic_sulfonates_ABC_transporter_substrate-binding_protein_OS=Alcaligenes_xylosoxydans_xylosoxydans_OX=85…
3	n35625	1	0	39	1	15	0	0	3.78127e-08	0.00047463	0.706187	6.25023	CTTGCTGGGCACGTTGGTGCCGGAGAACAACTCCCGCCCCTCCCGCTCCCAGGCGTCCGTCCCGCCCGCCAGCACCGAAATATCGCTCCAGCCCAGGCGCGTCAGCTTGGCCGCGG	116	tr|A0A0X8NVF6|A0A0X8NVF6_ALCXX_Rhodanese_OS=Alcaligenes_xylosoxydans_xylosoxydans_OX=85698_GN=AL504_02995_PE=4_SV=1~~~tr|F7T8A8|F7T8A8_9BURK_Rhodanese-like_domain-containing_protein_2_OS=Achromobacter_insuavis_AXX-A_OX=1003200_GN=AXXA_26010_PE=4_SV=1~~~tr|A0A7T4B0M9|A0A7T4B0M9_9BURK_Rhodanese_OS=Achromobacter_deleyi_OX=1353891_GN=I6I07_23000_PE=4_SV=1~~~tr|A0A1R1JX67|A0A1R1JX67_ALCXX_Rhodanese_OS…
3	n35655	1	0	39	1	15	0	0	3.78127e-08	0.00047463	0.706187	6.25023	GGGCGCGAATTCGGTTAAGTAAAGGTTTGCAAATATTAAGCGATACTTTATGGAAGGTAAA	61
3	n35696	1	0	39	1	15	0	0	3.78127e-08	0.00047463	0.706187	6.25023	TATTCGCTATAAAGATAAATATTCGCTATATAGAATAAAGGAGACAACATGAAGACCGGATTACCCCTGCTTCAATCCTCATTCTCGTCGCGGGCGGCCAGCTTGGCTGCGGCTGCCTTTATGGCTTTGGGCTCAGGGTCGGCCCGTGCCGAGCCTGTCTACCCGTCCAAACCGATAGAGGTGATCGTGGCGTCCTCGGCGGGCGGCATCCTGGACACTATCGCGCGCACGGCCGCGCACGGCATCGAACGCCTGGGCCAGCCTGCCGTGGTCAAGAACCTGCCGGGAGGCGGCGGCACCATCGGCACTCAGGCAGTGGCGCGCGCGCCGGGAGACGGCTACACCTTGGGGGCGGTAGCGACCAGCCACGCCATCAATCCCAGCATGTATTCCAAGCTG…	1153	tr|A0A2N8KMV1|A0A2N8KMV1_9BURK_ABC_transporter_substrate-binding_protein_OS=Achromobacter_pulmonis_OX=1389932_GN=C1I89_08905_PE=3_SV=1~~~tr|A0A0M7GGL5|A0A0M7GGL5_9BURK_Argininosuccinate_lyase_OS=Achromobacter_aegrifaciens_OX=1287736_GN=ERS370000_02146_PE=3_SV=1~~~tr|A0A658A9D7|A0A658A9D7_ALCXX_ABC_transporter_substrate-binding_protein_OS=Alcaligenes_xylosoxydans_xylosoxydans_OX=85698_GN=DAI43_304…
3	n35860	1	0	39	1	15	0	0	3.78127e-08	0.00047463	0.706187	6.25023	GTAGGTCTGCGCCGGGTCGAAATAGAACTGCACACGGTGGTCCAGCGTGTAGCGGTGGACCCCG	64	tr|J4J617|J4J617_9BURK_ABC_transporter_OS=Achromobacter_marplatensis_OX=470868_GN=QWC_28278_PE=4_SV=1~~~tr|A0A366GCG4|A0A366GCG4_9BURK_Carbohydrate_ABC_transporter_ATP-binding_protein_(CUT1_family)_OS=Achromobacter_marplatensis_OX=470868_GN=DFP87_1011057_PE=4_SV=1~~~tr|A0A2S8VFD1|A0A2S8VFD1_9BURK_ABC_transporter_OS=Achromobacter_sp._MYb9_OX=1827284_GN=CQ050_10950_PE=4_SV=1~~~tr|A0A7X9VWX1|A0A7X9V…
3	n35897	1	0	39	1	15	0	0	3.78127e-08	0.00047463	0.706187	6.25023	CGCCGCGAAGAAATTCAGCGGGAAATAGACCGCATTATCGAGCGCGTCGATGAACAGCGTG	61	tr|A0A7X9ZC47|A0A7X9ZC47_9BURK_DUF308_domain-containing_protein_OS=Achromobacter_sp._Bel_OX=2727415_GN=HG262_01160_PE=4_SV=1~~~tr|A0A366GCZ4|A0A366GCZ4_9BURK_Uncharacterized_membrane_protein_HdeD_(DUF308_family)_OS=Achromobacter_marplatensis_OX=470868_GN=DFP87_1011278_PE=4_SV=1~~~tr|J4J7X1|J4J7X1_9BURK_Uncharacterized_protein_OS=Achromobacter_marplatensis_OX=470868_GN=QWC_11416_PE=4_SV=1~~~tr|A0A…
3	n35959	1	0	39	1	15	0	0	3.78127e-08	0.00047463	0.706187	6.25023	CCGCAGTTCATCTTCCAGCTGGACGACGCGCGGCATGAAATAGATGCCGCGCTCGTACTCGGCGGCAGCCATGGCGATGCGCCAGCCTTCGCCGGGTGCTCCCAGAATGCGGCCCTCGGGAACCGGCGTCGCGTCGAACAGCACTTCGTTG	151	tr|A0A446CLR1|A0A446CLR1_9BURK_HTH-type_transcriptional_regulator_CdhR_OS=Achromobacter_agilis_OX=1353888_GN=cdhR_4_PE=4_SV=1~~~tr|A0A2S8V8F7|A0A2S8V8F7_9BURK_Uncharacterized_protein_OS=Achromobacter_sp._MYb9_OX=1827284_GN=CQ050_19435_PE=4_SV=1~~~tr|J4YFT2|J4YFT2_9BURK_Uncharacterized_protein_OS=Achromobacter_marplatensis_OX=470868_GN=QWC_15059_PE=4_SV=1~~~tr|A0A6S7DVX5|A0A6S7DVX5_9BURK_Acyl-CoA_…
3	n36007	1	0	39	1	15	0	0	3.78127e-08	0.00047463	0.706187	6.25023	CGGTGGACGACGAGAACACCGCCAAATAGCAGGCCTTCAAGCCTGAGGCGTGCGCAGCCCC	61
3	n36087	1	0	39	1	15	0	0	3.78127e-08	0.00047463	0.706187	6.25023	GTTGGGGAAATAGCCGCGGCCATTGCCCGAGCACTGCAAGACCATCGCCAGCGTCTGCAGG	61	tr|A0A6S7F4L0|A0A6S7F4L0_9BURK_Uncharacterized_protein_OS=Achromobacter_insolitus_OX=217204_GN=LMG6000_00411_PE=4_SV=1~~~tr|E3HEQ0|E3HEQ0_ACHXA_Oxidoreductase_molybdopterin_binding_domain_protein_2_OS=Achromobacter_xylosoxidans_(strain_A8)_OX=762376_GN=AXYL_03139_PE=4_SV=1~~~tr|A0A424WBV8|A0A424WBV8_ALCXX_Sulfite_oxidase_OS=Alcaligenes_xylosoxydans_xylosoxydans_OX=85698_GN=DY367_16800_PE=4_SV=1~~…
3	n36156	1	0	39	1	15	0	0	3.78127e-08	0.00047463	0.706187	6.25023	GTGCAATATTAAATAGCGCACTATTTATTTGATCTAACGATAGTGGGCCTGGCCCGCCGCTTCAAAGACTTGCG	74
3	n36195	1	0	39	1	15	0	0	3.78127e-08	0.00047463	0.706187	6.25023	CGGATTGGCCGAGCCGGGCGCGGGGCTGCCTTCGGGCGAGACGTGCACGGCATCGCAAGCAATGCCGGCGCCGCGGAAATAGCGCTCCATGCCCAGCAGCGGCGTGGTGGTGCCGCCTTCG	121	tr|A0A7Y4KAB2|A0A7Y4KAB2_9BURK_C1_family_peptidase_OS=Achromobacter_deleyi_OX=1353891_GN=HLG70_22290_PE=4_SV=1~~~tr|A0A6S7FIK0|A0A6S7FIK0_9BURK_Uncharacterized_protein_OS=Achromobacter_insolitus_OX=217204_GN=LMG6000_05883_PE=4_SV=1~~~tr|A0A658ACI9|A0A658ACI9_ALCXX_Uncharacterized_protein_OS=Alcaligenes_xylosoxydans_xylosoxydans_OX=85698_GN=DAI43_22520_PE=4_SV=1~~~tr|E3HRW6|E3HRW6_ACHXA_Uncharacte…
3	n36359	1	0	39	1	15	0	0	3.78127e-08	0.00047463	0.706187	6.25023	AGAAATAGGAATTCATATCGAGATCCCTTGGGGGTCGTTGAGGAGTTGTACGCAGATTTTGGTTATCCTGTGTCTGTCTCTTCTTTTGTCA	91	tr|A0A4Q1HS17|A0A4Q1HS17_9BURK_MFS_transporter_OS=Achromobacter_aloeverae_OX=1750518_GN=C7R54_06475_PE=4_SV=1~~~tr|A0A2N8KEI4|A0A2N8KEI4_9BURK_Fibronectin-binding_protein_(FBP)_OS=Achromobacter_pulmonis_OX=1389932_GN=C1I89_23955_PE=4_SV=1
3	n36447	1	0	39	1	15	0	0	3.78127e-08	0.00047463	0.706187	6.25023	GTGGGCCTCGAAATAGGCGCCCACCGGGCGGCCGCCCACGGGGTCCGTGCCGGCATAGCCG	61	tr|A0A7D4HYY1|A0A7D4HYY1_9BURK_Zn-dependent_hydrolase_OS=Achromobacter_pestifer_OX=1353889_GN=FOC84_15085_PE=3_SV=1~~~tr|A0A446CLW3|A0A446CLW3_9BURK_N-carbamoyl-L-amino_acid_hydrolase_OS=Achromobacter_agilis_OX=1353888_GN=amaB_3_PE=3_SV=1~~~tr|E3HFX0|E3HFX0_ACHXA_N-carbamyl-L-cysteine_amidohydrolase_2_OS=Achromobacter_xylosoxidans_(strain_A8)_OX=762376_GN=AXYL_04424_PE=3_SV=1~~~tr|A0A7D4I2D4|A0A7…
3	n36475	1	0	39	1	15	0	0	3.78127e-08	0.00047463	0.706187	6.25023	GAAATAGGCGCCGGCGGGCTGGGGGATTACCTTGACGTCGGTGCCGGCGACCGATTTAGTGATCTCCGCCAGCTTGTCCTTCTGATGGTCAAACACG	97	tr|A0A6S7F2Z7|A0A6S7F2Z7_9BURK_Cadmium-transporting_ATPase_OS=Achromobacter_insolitus_OX=217204_GN=cadA_1_PE=3_SV=1~~~tr|D4XHF6|D4XHF6_9BURK_ALP_N_domain-containing_protein_OS=Achromobacter_piechaudii_ATCC_43553_OX=742159_GN=HMPREF0004_4903_PE=4_SV=1~~~tr|A0A1N7P188|A0A1N7P188_9BURK_Plasmid_segregation_actin-type_ATPase_ParM_OS=Achromobacter_sp._MFA1_R4_OX=1881016_GN=SAMN05428937_0362_PE=4_SV=1~~…
3	n36492	1	0	39	1	15	0	0	3.78127e-08	0.00047463	0.706187	6.25023	GGTGTAGAAATAGGCGGCCAGGCCCGAGGCACTATCGTTGGCGCGCGCCAGCACGGCGGCTTCGGATTCGAAGGTACTGATTCCCACCACCGGGCCGAAGATCTCTTCGTGC	112	tr|A0A7D4IML0|A0A7D4IML0_9BURK_Aldehyde_dehydrogenase_OS=Achromobacter_pestifer_OX=1353889_GN=FOC84_30225_PE=3_SV=1~~~tr|A0A7Y4K4G9|A0A7Y4K4G9_9BURK_Aldehyde_dehydrogenase_OS=Achromobacter_deleyi_OX=1353891_GN=HLG70_03635_PE=3_SV=1~~~tr|A0A6S6YMN6|A0A6S6YMN6_9BURK_NADP/NAD-dependent_aldehyde_dehydrogenase_PuuC_OS=Achromobacter_pestifer_OX=1353889_GN=puuC_1_PE=3_SV=1~~~tr|A0A446CJ69|A0A446CJ69_9BU…
3	n36540	1	0	39	1	15	0	0	3.78127e-08	0.00047463	0.706187	6.25023	AAATAGGGACGCGCTTGCCGCCCCACCACCGCCACCCCGCCCCACCGCATTCGCGCCAGCG	61
3	n36799	1	0	39	1	15	0	0	3.78127e-08	0.00047463	0.706187	6.25023	TACGTGGCCGGCGGCCAGAAGGAAATCAAGTTGGTCTACCCGACCGAGGGCAGCTACCTGG	61	tr|A0A8B0RWD3|A0A8B0RWD3_9BURK_Conjugal_transfer_protein_TraC_OS=Achromobacter_sp._OX=134375_PE=4_SV=1~~~tr|A0A7D4HVL0|A0A7D4HVL0_9BURK_DUF1738_domain-containing_protein_OS=Achromobacter_pestifer_OX=1353889_GN=FOC84_00430_PE=4_SV=1~~~tr|A0A6S7EAQ6|A0A6S7EAQ6_9BURK_Toprim_domain-containing_protein_OS=Achromobacter_anxifer_OX=1287737_GN=LMG26858_04298_PE=4_SV=1~~~tr|A0A2N8K966|A0A2N8K966_9BURK_DUF1…
3	n36846	1	0	39	1	15	0	0	3.78127e-08	0.00047463	0.706187	6.25023	TTCGCCCTTGATGTAGCGCGCGTCGAAATCAAGGGTGGCGTCGGCTATCGGCACGCCGCGGGGTACCGGCAGGTAGAACTC	81	tr|A0A6S7BJ85|A0A6S7BJ85_9BURK_Agmatine_deiminase_OS=Achromobacter_deleyi_OX=1353891_GN=aguA_PE=4_SV=1~~~tr|A0A0M7E5Q3|A0A0M7E5Q3_ALCXX_Agmatine_deiminase_OS=Alcaligenes_xylosoxydans_xylosoxydans_OX=85698_GN=aguA_PE=4_SV=1~~~tr|A0A7U0EBJ6|A0A7U0EBJ6_ALCXX_Cyclic_di-GMP-binding_protein_OS=Alcaligenes_xylosoxydans_xylosoxydans_OX=85698_GN=I6I48_12620_PE=3_SV=1~~~tr|A0A7X9W0I3|A0A7X9W0I3_9BURK_Cycli…
3	n36895	1	0	39	1	15	0	0	3.78127e-08	0.00047463	0.706187	6.25023	CTCGCCCAGCGTCCTGGTCGTGTCCGCCAAATCACCCTACCGCACGGCGCAAGACCTGATCGCCGCCCTGA	71	tr|A0A446CFT1|A0A446CFT1_9BURK_Uncharacterized_protein_OS=Achromobacter_veterisilvae_OX=2069367_GN=AVE30378_02241_PE=3_SV=1~~~tr|A0A6S7FJM7|A0A6S7FJM7_9BURK_Uncharacterized_protein_OS=Achromobacter_insolitus_OX=217204_GN=LMG6000_06338_PE=3_SV=1~~~tr|A0A5N7ZX29|A0A5N7ZX29_9BURK_Tripartite_tricarboxylate_transporter_substrate_binding_protein_OS=Achromobacter_sp._OX=134375_GN=E2603_13685_PE=3_SV=1~~…
3	n36905	1	0	39	1	15	0	0	3.78127e-08	0.00047463	0.706187	6.25023	GCGCAGATCAATCTGGCCGCGAGCAACTGCGTGAAATCACCCGCCGCCATGGCCCAGCCCGCACCCAGCGCGTATA	76	tr|A0A6S7FFN1|A0A6S7FFN1_9BURK_Multidrug_resistance_protein_MdtL_OS=Achromobacter_insolitus_OX=217204_GN=mdtL_PE=4_SV=1~~~tr|A0A658A6L1|A0A658A6L1_ALCXX_MFS_transporter_OS=Alcaligenes_xylosoxydans_xylosoxydans_OX=85698_GN=DAI43_24740_PE=4_SV=1~~~tr|A0A0M7IXY6|A0A0M7IXY6_9BURK_Inner_membrane_transport_protein_ydhC_OS=Achromobacter_aegrifaciens_OX=1287736_GN=ydhC_PE=4_SV=1~~~tr|E3HRU4|E3HRU4_ACHXA_…
3	n37038	1	0	39	1	15	0	0	3.78127e-08	0.00047463	0.706187	6.25023	GCCGAGCTGGCCGAACTCATCGAGCAGGAACGCGACCCGGTGCGCCGGCTGCACGTTACTGGACGTGATCGCGGCAATGATCGACCCGACAAACAAGCGCAGGAAACGCGCATTTGGGCCGATGCGGTTGGCGGGCATGACCAGGAACACCGTCATCAATTCGGACTTGATCGCGGACAGGTCGAAGTCGGAGCGCGATAGCGCCGCTGCAATGCGCGGATCGTCCAAGAAGGCGGTATGCGTGCGGGCCGTTGAAATCACGTCTCCCCGCGCCTTGTCGGCCATGCCCATGATGGTATTCGCGGCCCTGGCCGGGATGCCGAAGGCGGCCGTTTCGTCGGCGGCCATCATGCCCAGGAGGTCGAAAAACTCGCCTTCACCCGTGGTCAGCAAGCGGCG…	691	tr|A0A2S5GJF2|A0A2S5GJF2_9BURK_Universal_stress_protein_OS=Achromobacter_spanius_OX=217203_GN=C4E15_27080_PE=3_SV=1~~~tr|A0A193PMK4|A0A193PMK4_ALCXX_Conjugal_transfer_coupling_protein_TraG_OS=Alcaligenes_xylosoxydans_xylosoxydans_OX=85698_GN=traG_PE=3_SV=1~~~tr|A0A0D5A0C3|A0A0D5A0C3_9BURK_Conjugal_transfer_protein_TraG_OS=Achromobacter_sp._LM16_OX=1449778_GN=pLM16A1_p17_PE=3_SV=1~~~tr|T2K1A4|T2K1…
3	n37134	1	0	39	1	15	0	0	3.78127e-08	0.00047463	0.706187	6.25023	GCCAGGTGGCTCGCGACACGCAACCCGACGCGGCCGCGCTGGAAATCATCTTTCTGAACACCAACCCCGCTTCCACCCTGCTG	83	tr|A0A446CIU8|A0A446CIU8_9BURK_Uncharacterized_protein_OS=Achromobacter_agilis_OX=1353888_GN=AGI3411_03317_PE=3_SV=1~~~tr|A0A2S0IB35|A0A2S0IB35_9BURK_LacI_family_transcriptional_regulator_OS=Achromobacter_spanius_OX=217203_GN=CLM73_20170_PE=3_SV=1~~~tr|A0A6S7EVL6|A0A6S7EVL6_9BURK_Uncharacterized_protein_OS=Achromobacter_insolitus_OX=217204_GN=LMG6000_00424_PE=3_SV=1~~~tr|A0A1R1JWD1|A0A1R1JWD1_ALC…
3	n37152	1	0	39	1	15	0	0	3.78127e-08	0.00047463	0.706187	6.25023	CACCGAGATCCCCAAGTTGCAGGCGGAAATCATCGGCAAGGTCCCGGACGCGCAGGTGATG	61	tr|A0A4Q1HDL4|A0A4Q1HDL4_9BURK_Carboxymethylenebutenolidase_OS=Achromobacter_aloeverae_OX=1750518_GN=C7R54_23635_PE=4_SV=1~~~tr|A0A246Q5J3|A0A246Q5J3_9BURK_Carboxymethylenebutenolidase_OS=Achromobacter_sp._HZ28_OX=2015171_GN=CEY04_17360_PE=4_SV=1~~~tr|J4QXD9|J4QXD9_9BURK_Carboxymethylenebutenolidase_4_OS=Achromobacter_marplatensis_OX=470868_GN=QWC_03863_PE=4_SV=1~~~tr|A0A366FXX6|A0A366FXX6_9BURK_…
3	n37177	1	0	39	1	15	0	0	3.78127e-08	0.00047463	0.706187	6.25023	AAGCCACTTGCCGTGCTCGACATACAGTCCTGCCAAATCATCGGTTATGGGTAGATCCTGGGCTGGCATGAGGACGGAA	79	tr|A0A246Q074|A0A246Q074_9BURK_RNA_polymerase_subunit_sigma_OS=Achromobacter_sp._HZ28_OX=2015171_GN=CEY04_26645_PE=3_SV=1~~~tr|A0A4Q1HHU8|A0A4Q1HHU8_9BURK_RNA_polymerase_subunit_sigma_OS=Achromobacter_aloeverae_OX=1750518_GN=C7R54_20700_PE=3_SV=1~~~tr|A0A6S7EZV3|A0A6S7EZV3_9BURK_Putative_RNA_polymerase_sigma_factor_FecI_OS=Achromobacter_insolitus_OX=217204_GN=fecI_5_PE=3_SV=1~~~tr|A0A0M7KBE4|A0A0…
3	n37286	1	0	39	1	15	0	0	3.78127e-08	0.00047463	0.706187	6.25023	TTCCTGAAATCAGACCAGGATGATGTCGTACTGCTCTTGAGAGTACGCGCCT	52	tr|A0A6S7B1L5|A0A6S7B1L5_9BURK_Ribonuclease_G_OS=Achromobacter_kerstersii_OX=1353890_GN=rng_PE=4_SV=1~~~tr|A0A6S7AKG2|A0A6S7AKG2_9BURK_Ribonuclease_G_OS=Achromobacter_deleyi_OX=1353891_GN=rng_PE=4_SV=1~~~tr|A0A7T4BA43|A0A7T4BA43_9BURK_Ribonuclease_G_OS=Achromobacter_deleyi_OX=1353891_GN=rng_PE=4_SV=1~~~tr|A0A6S7EFI0|A0A6S7EFI0_9BURK_Ribonuclease_G_OS=Achromobacter_pulmonis_OX=1389932_GN=rng_PE=4_…
3	n37345	1	0	39	1	15	0	0	3.78127e-08	0.00047463	0.706187	6.25023	GCTGCTTCGTACGATGACGCCTCAGGAAGCGATGCTCAAGACCGTTGAATTGAGGCGCCAAGGGTTGTTGACGCTCTCAGTTCCCGATTTGGAGCGTCTGGCCAGATTCAATCTGCTGCTGTTGAAATCAGCCGATCTCGTGACGTGCGCCCGGATTGCGCATCCCAAAGGGGAAGTTACCCAACACGTTGCAGCGTCGACATATGCACTGCTCGTCCAACAACCTCCGGCAGTCATCGATGATTGGCTGGACTTGTCGTACCGCGCAATCCTTGCAAGCCTGCAAAAACAACCTGGCCATCGCCCTTCACAACAGGAAATCGATGCGTCCCTGCGGCGGGTACTCGCGACATTACCGGAAGCACAGCAGTATGCGATTCGTCTTCTGGTTGAGTCGCC…	648	tr|A0A0M7LTQ6|A0A0M7LTQ6_9BURK_Uncharacterized_protein_OS=Achromobacter_aegrifaciens_OX=1287736_GN=ERS370000_05273_PE=4_SV=1~~~tr|A0A7Y4K666|A0A7Y4K666_9BURK_Uncharacterized_protein_OS=Achromobacter_deleyi_OX=1353891_GN=HLG70_11270_PE=4_SV=1~~~tr|A0A7U0I2S0|A0A7U0I2S0_ALCXX_Uncharacterized_protein_OS=Alcaligenes_xylosoxydans_xylosoxydans_OX=85698_GN=I6I48_23535_PE=4_SV=1~~~tr|A0A0M7LUR3|A0A0M7LUR…
3	n37415	1	0	39	1	15	0	0	3.78127e-08	0.00047463	0.706187	6.25023	AAATCAGGAATCGGCATCGGTGGCGGCCGCCAGGCGAAAAAAAACCGGTCCGCATGGGACC	61	tr|A0A446CLF1|A0A446CLF1_9BURK_Sensor_protein_QseC_OS=Achromobacter_veterisilvae_OX=2069367_GN=qseC_1_PE=4_SV=1~~~tr|A0A2N8KK70|A0A2N8KK70_9BURK_Relaxase_OS=Achromobacter_pulmonis_OX=1389932_GN=C1I89_06230_PE=4_SV=1
3	n37445	1	0	39	1	15	0	0	3.78127e-08	0.00047463	0.706187	6.25023	ACTTTGAAGCGCAAATCAGGCCTGCGCGTCCTAATCGTCGATTACCTCCAGCTTATGGTCGGG	63	tr|A0A2I8DIA1|A0A2I8DIA1_9BURK_Replicative_DNA_helicase_OS=Achromobacter_sp._AONIH1_OX=1758194_GN=dnaB_PE=3_SV=1~~~tr|A0A1R1JTJ9|A0A1R1JTJ9_ALCXX_DNA_helicase_OS=Alcaligenes_xylosoxydans_xylosoxydans_OX=85698_GN=BIZ92_08550_PE=3_SV=1~~~tr|A0A2S5GU51|A0A2S5GU51_9BURK_DNA_helicase_OS=Achromobacter_spanius_OX=217203_GN=C4E15_06680_PE=3_SV=1~~~tr|A0A1N7P3Z1|A0A1N7P3Z1_9BURK_DNA_helicase_OS=Achromobac…
3	n37455	1	0	39	1	15	0	0	3.78127e-08	0.00047463	0.706187	6.25023	ACAGCGCGTCCTTGTATTGCGAGGAAATCAGGCCGCCTCCCAGCGCCTCGATCACGCCCAG	61	tr|A0A0X8C4C9|A0A0X8C4C9_9PSED_Branched-chain_amino_acid_transporter_permease_subunit_LivH_OS=Pseudomonas_monteilii_OX=76759_GN=APT63_17705_PE=4_SV=1~~~tr|A0A4Q1HPG0|A0A4Q1HPG0_9BURK_High-affinity_branched-chain_amino_acid_ABC_transporter_permease_LivH_OS=Achromobacter_aloeverae_OX=1750518_GN=C7R54_09765_PE=4_SV=1~~~tr|A0A0M7EIG8|A0A0M7EIG8_9BURK_LIV-I_protein_H_OS=Achromobacter_aegrifaciens_OX=1…
3	n37575	1	0	39	1	15	0	0	3.78127e-08	0.00047463	0.706187	6.25023	TGCCCACCGCGGCCGAGTCTATGTCGCGCAAATCCACCCGTACCTGCGGATACTGCCTGCGCATCAAGCCGATG	74	tr|A0A658A2D0|A0A658A2D0_ALCXX_DNA-binding_response_regulator_OS=Alcaligenes_xylosoxydans_xylosoxydans_OX=85698_GN=DAI43_36000_PE=4_SV=1~~~tr|A0A6S7CHV6|A0A6S7CHV6_9BURK_Transcriptional_regulatory_protein_RcsB_OS=Achromobacter_anxifer_OX=1287737_GN=rcsB_1_PE=4_SV=1~~~tr|A0A424WHV3|A0A424WHV3_ALCXX_DNA-binding_response_regulator_OS=Alcaligenes_xylosoxydans_xylosoxydans_OX=85698_GN=DY367_06475_PE=4…
3	n37795	1	0	39	1	15	0	0	3.78127e-08	0.00047463	0.706187	6.25023	CCAGCGGGACTGGGCAGCGACCTCATGGAAATCCAGCCAGCGCGCAACGCCCACCAGCACG	61	tr|A0A0M9I8T2|A0A0M9I8T2_9BURK_Glutathionine_S-transferase_OS=Achromobacter_aegrifaciens_OX=1287736_GN=ERS370000_01513_PE=4_SV=1~~~tr|A0A658AH71|A0A658AH71_ALCXX_Glutathione_S-transferase_family_protein_OS=Alcaligenes_xylosoxydans_xylosoxydans_OX=85698_GN=DAI43_00175_PE=4_SV=1~~~tr|A0A424WKA7|A0A424WKA7_ALCXX_Glutathione_S-transferase_family_protein_OS=Alcaligenes_xylosoxydans_xylosoxydans_OX=856…
3	n37871	1	0	39	1	15	0	0	3.78127e-08	0.00047463	0.706187	6.25023	TCCGCTGGCCAGCTACACCACGCCGCTGACCCTGAAGCATCCCATTGGCAACGGCGTCGCGCGCACCTACATCCATTGCACTCAGCCCGAGCTGGCGGTGCTGGACGAATCGCGCAAGCTGGTGAAATCCCAAGCGGGCTGGAACTGGGTCGATATTGCCGCGCCGCACGAAGCGCACATCACGCATCCGGCCTTGCTGGCCGAT	205	tr|A0A1R1JV26|A0A1R1JV26_ALCXX_Esterase_OS=Alcaligenes_xylosoxydans_xylosoxydans_OX=85698_GN=BIZ92_25515_PE=4_SV=1~~~tr|F7T8F9|F7T8F9_9BURK_Esterase_OS=Achromobacter_insuavis_AXX-A_OX=1003200_GN=AXXA_26265_PE=4_SV=1~~~tr|A0A109XYI1|A0A109XYI1_ALCXX_Alpha/beta_hydrolase_OS=Alcaligenes_xylosoxydans_xylosoxydans_OX=85698_GN=AL504_02750_PE=4_SV=2~~~tr|J4YRS4|J4YRS4_9BURK_Esterase_OS=Achromobacter_mar…
3	n38063	1	0	39	1	15	0	0	3.78127e-08	0.00047463	0.706187	6.25023	CGACACCAGGCCGCTGGCGCCGCTGAAATCCCGCCGCCAGAACGCATGGCCCGGGTCCTGCGCCAACGCTGGGTAATAGACTCTGGCGACGTCCTCGTGCCGCGCCAGATATTCGGCCACGACCAACGCGTTTTCATGATGCCGCGCCAGCCGCACATCCAACGTGCGCAGGCCGCGCAAGGTCAGATAGGC	192	tr|A0A1D8I8I0|A0A1D8I8I0_9BURK_HTH-type_transcriptional_regulator_GbpR_OS=Achromobacter_ruhlandii_OX=72557_GN=gbpR_5_PE=3_SV=1~~~tr|A0A5K4YK79|A0A5K4YK79_ALCXX_LysR_family_transcriptional_regulator_OS=Alcaligenes_xylosoxydans_xylosoxydans_OX=85698_GN=AL520_17940_PE=4_SV=1~~~tr|A0A095VK92|A0A095VK92_9BURK_Cystathionine_beta-lyase_OS=Achromobacter_sp._RTa_OX=1532557_GN=JL37_27930_PE=3_SV=1~~~tr|A0A…
3	n38092	1	0	39	1	15	0	0	3.78127e-08	0.00047463	0.706187	6.25023	CGTTGAGAGGCTTGGGACCTGCGGCGTTGAAGTTGGCTGGGCGTGCGGCGGCTGGCGCTGCGCTGTTCCTGTTTAGCGAAGATCTGAATGGGGGCGAGCAAGAAGACCTGGCTGCGATGAGAAATCCCGCGCTGAAGCGCAAGGAAATTCTCGACGCAGTCAGGTACTTCGAGGCCAAGGACTACACCCGGGAGGCGGCCGTGGGG	206	tr|A0A2I8DT63|A0A2I8DT63_9BURK_Alkaline_phosphatase_OS=Achromobacter_sp._AONIH1_OX=1758194_GN=C2U31_27000_PE=3_SV=1~~~tr|A0A0Q8WL10|A0A0Q8WL10_9BURK_Citrate_transporter_OS=Achromobacter_sp._Root83_OX=1736602_GN=ASE30_16160_PE=4_SV=1~~~tr|A0A2S0IBX5|A0A2S0IBX5_9BURK_3-hydroxyalkanoate_synthetase_OS=Achromobacter_spanius_OX=217203_GN=CLM73_21735_PE=4_SV=1~~~tr|A0A0M7GTH8|A0A0M7GTH8_9BURK_Phage_lyso…
3	n38263	1	0	39	1	15	0	0	3.78127e-08	0.00047463	0.706187	6.25023	CTTTTTCGGCGGGCGCATGGTCAGCCCGCCAAATCCTCGCCCTTCTATGCTGGGCCGTTCG	61	tr|A0A2N8KD05|A0A2N8KD05_9BURK_Enoyl-CoA_hydratase_OS=Achromobacter_pulmonis_OX=1389932_GN=C1I89_26060_PE=3_SV=1~~~tr|A0A446CC13|A0A446CC13_9BURK_Carnitinyl-CoA_dehydratase_OS=Achromobacter_veterisilvae_OX=2069367_GN=caiD_2_PE=3_SV=1~~~tr|A0A7D4DY73|A0A7D4DY73_9BURK_Crotonase/enoyl-CoA_hydratase_family_protein_OS=Achromobacter_pestifer_OX=1353889_GN=FOC84_16545_PE=3_SV=1~~~tr|A0A0L8EMK0|A0A0L8EMK…
3	n38519	1	0	39	1	15	0	0	3.78127e-08	0.00047463	0.706187	6.25023	GGTGAAATCCTGGTGGCAGGTGCGCGACGCGCACGACCGCTATACCGCCACCGCCTGCAAG	61	tr|A0A7D4HXN0|A0A7D4HXN0_9BURK_SDR_family_oxidoreductase_OS=Achromobacter_pestifer_OX=1353889_GN=FOC84_05720_PE=4_SV=1~~~tr|A0A366FC04|A0A366FC04_9BURK_Uncharacterized_protein_OS=Achromobacter_marplatensis_OX=470868_GN=DFP87_12066_PE=4_SV=1~~~tr|J4Y770|J4Y770_9BURK_Lipoprotein_15_OS=Achromobacter_marplatensis_OX=470868_GN=QWC_29793_PE=4_SV=1~~~tr|A0A7X9W1R2|A0A7X9W1R2_9BURK_Uncharacterized_protei…
3	n38604	1	0	39	1	15	0	0	3.78127e-08	0.00047463	0.706187	6.25023	GGCTGCCGGAGAAATCCGAGTCCGCGTCGACCTGGCCGTAGATCGCATAGCGTTCCCCCCA	61	tr|A0A6S7DQM9|A0A6S7DQM9_9BURK_Autotransporter_domain-containing_protein_OS=Achromobacter_dolens_OX=1287738_GN=LMG26841_00969_PE=4_SV=1~~~tr|A0A1R1JT13|A0A1R1JT13_ALCXX_Autotransporter_outer_membrane_beta-barrel_domain-containing_protein_OS=Alcaligenes_xylosoxydans_xylosoxydans_OX=85698_GN=BIZ92_26550_PE=4_SV=1~~~tr|A0A0D6I710|A0A0D6I710_ALCXX_Autotransporter_outer_membrane_beta-barrel_domain-con…
3	n38702	1	0	39	1	15	0	0	3.78127e-08	0.00047463	0.706187	6.25023	GTTTGTGCAAGTCAGGTGGAAAAAACTTTTTCCAGACCGGCCTCAAGCCGCAAATCCGCCGTCCACCGCCAGGCTCGCGCCCGTG	85	tr|A0A0X8BYP4|A0A0X8BYP4_9PSED_AraC_family_transcriptional_regulator_OS=Pseudomonas_monteilii_OX=76759_GN=APT63_16600_PE=4_SV=1~~~tr|A0A6N0JM06|A0A6N0JM06_ACHDE_3-oxoacyl-ACP_reductase_FabG_OS=Achromobacter_denitrificans_OX=32002_GN=FOC81_16115_PE=4_SV=1~~~tr|A0A658A7Q5|A0A658A7Q5_ALCXX_Short-chain_dehydrogenase_OS=Alcaligenes_xylosoxydans_xylosoxydans_OX=85698_GN=DAI43_25005_PE=4_SV=1~~~tr|A0A0M…
3	n38729	1	0	39	1	15	0	0	3.78127e-08	0.00047463	0.706187	6.25023	TGCCAGAAATCCGCGAACAGTTTTGCTGACACGGAAAAAGCGATCAGCACGGCCGCGCCAG	61	tr|A0A658AC31|A0A658AC31_ALCXX_Uncharacterized_protein_OS=Alcaligenes_xylosoxydans_xylosoxydans_OX=85698_GN=DAI43_11335_PE=4_SV=1~~~tr|A0A0M7FQ74|A0A0M7FQ74_9BURK_Uncharacterized_protein_OS=Achromobacter_aegrifaciens_OX=1287736_GN=ERS370000_01855_PE=4_SV=1~~~tr|A0A424WJP0|A0A424WJP0_ALCXX_Uncharacterized_protein_OS=Alcaligenes_xylosoxydans_xylosoxydans_OX=85698_GN=DY367_01890_PE=4_SV=1~~~tr|E3HIA…
3	n38767	1	0	39	1	15	0	0	3.78127e-08	0.00047463	0.706187	6.25023	CAGCAGCGGCTTGAACTCGATCTCCGCGTCGTTGGCGCCGATGTAGGTCAACCCGAAATCCGCGTCCCCGCGCGCCACCGCCGTCAGCACCTGCGAG	97	tr|A0A0L8ESX5|A0A0L8ESX5_9BURK_HTH_lysR-type_domain-containing_protein_OS=Achromobacter_sp._DMS1_OX=1688405_GN=AD428_05990_PE=3_SV=1~~~tr|A0A6S7AEH5|A0A6S7AEH5_9BURK_Hydrogen_peroxide-inducible_genes_activator_OS=Achromobacter_deleyi_OX=1353891_GN=oxyR_1_PE=3_SV=1~~~tr|F7SW51|F7SW51_9BURK_LysR_family_transcriptional_regulator_OS=Achromobacter_insuavis_AXX-A_OX=1003200_GN=AXXA_04493_PE=3_SV=1~~~tr…
3	n38844	1	0	39	1	15	0	0	3.78127e-08	0.00047463	0.706187	6.25023	TACGTCCTGCGCGGCACCGACTCCTGGCAAACCGCAACGGCCGACTACCGCAGCGGCACTGGCGAAATCCGGACCATTACCCTGCCGGATGGGTCCAGCGTGACGCTGTCCACCGCGACCGCCATCGACCTCAGGTTCACCGCGGACGAACGCGTGGTGGTGCTGCACGCCGGAGAAATCCTGGTAGCAACCGCGCCAGATCTGGCAGCCATGGCCCGGCCGTTCCGGGTGCGCAGCCGCCACGGCTCCATCCAGGCCCTGGGCACCCGATTCTCGGTCAGGGACGATACCGAAACCTCCCGCGTGGCCGTGTTCGAAGGCGCCGTGGAAATCCGTCCCCTCGGCGCACCGGAACAGGCAGTCCTGCTTCAAGCCGGCCAGGGTTCGCGCTTTTCGTCA…	457	tr|A0A6S6ZQ13|A0A6S6ZQ13_9BURK_Protein_FecR_OS=Achromobacter_animicus_OX=1389935_GN=fecR_4_PE=4_SV=1~~~tr|A0A6S7F4T1|A0A6S7F4T1_9BURK_Protein_FecR_OS=Achromobacter_insolitus_OX=217204_GN=fecR_5_PE=4_SV=1~~~tr|A0A6S7EYP1|A0A6S7EYP1_9BURK_Protein_FecR_OS=Achromobacter_dolens_OX=1287738_GN=fecR_13_PE=4_SV=1~~~tr|A0A6J5B2Z3|A0A6J5B2Z3_9BURK_Protein_FecR_OS=Achromobacter_insuavis_OX=1287735_GN=fecR_25…
3	n38900	1	0	39	1	15	0	0	3.78127e-08	0.00047463	0.706187	6.25023	CTTGGCGGGCAAGCGCACGCTTGACGACCAAATCCGTTCGGAGCAGTTGGCGGTGACGGCA	61	tr|A0A2S5GM66|A0A2S5GM66_9BURK_AdeC/AdeK/OprM_family_multidrug_efflux_complex_outer_membrane_factor_OS=Achromobacter_spanius_OX=217203_GN=C4E15_22295_PE=3_SV=1~~~tr|E3HS87|E3HS87_ACHXA_Outer_membrane_protein_OprM_2_OS=Achromobacter_xylosoxidans_(strain_A8)_OX=762376_GN=AXYL_02713_PE=3_SV=1~~~tr|A0A2S8V1X9|A0A2S8V1X9_9BURK_Multidrug_transporter_OS=Achromobacter_sp._MYb9_OX=1827284_GN=CQ050_26490_P…
3	n38909	1	0	39	1	15	0	0	3.78127e-08	0.00047463	0.706187	6.25023	AGCGGTGACGCGATCAGCGGCCAGGCGCAAATCCGGAAACGTCAGCGCCGTGCCCGCCAGA	61	tr|A0A246Q495|A0A246Q495_9BURK_ABC_transporter_ATP-binding_protein_OS=Achromobacter_sp._HZ28_OX=2015171_GN=CEY04_18255_PE=4_SV=1~~~tr|A0A4Q1HE38|A0A4Q1HE38_9BURK_ABC_transporter_ATP-binding_protein_OS=Achromobacter_aloeverae_OX=1750518_GN=C7R54_24255_PE=4_SV=1~~~tr|A0A7D4E0W2|A0A7D4E0W2_9BURK_ShlB/FhaC/HecB_family_hemolysin_secretion/activation_protein_OS=Achromobacter_pestifer_OX=1353889_GN=FOC8…
3	n38989	1	0	39	1	15	0	0	3.78127e-08	0.00047463	0.706187	6.25023	GCCATCCAGAAATCCGGCGAATTCGAAGGCCGGGACGTGCCGTTCTATTCACGCCAGACCGGCACGCTGGGCGGACGCTACATGCGCAATAACTGGACTTTCAACCTCTACACGACGGCA	120	tr|A0A8B5V1U1|A0A8B5V1U1_9BURK_Uncharacterized_protein_OS=Achromobacter_sp._SLBN-14_OX=2768442_GN=FBY20_3207_PE=4_SV=1~~~tr|A0A095VKI5|A0A095VKI5_9BURK_Iron_transporter_OS=Achromobacter_sp._RTa_OX=1532557_GN=JL37_28535_PE=3_SV=1~~~tr|A0A7D4HV04|A0A7D4HV04_9BURK_TonB-dependent_siderophore_receptor_OS=Achromobacter_pestifer_OX=1353889_GN=FOC84_29575_PE=3_SV=1~~~tr|A0A446C313|A0A446C313_9BURK_Fe(3+)…
3	n39137	1	0	39	1	15	0	0	3.78127e-08	0.00047463	0.706187	6.25023	GACCTGATACCCGTGCGCTTCCAGTTGCAGACAGCGCAGCACATTCGTGATCTGGCTCCCAAATTCCCGCGTATGCAGCGGATGCCGCCAAATCTCAGCCAGCGGATCAGCCAGCGCCTTCGCCTTG	127	tr|A0A0M7DDL6|A0A0M7DDL6_ALCXX_Methyltranfer_dom_domain-containing_protein_OS=Alcaligenes_xylosoxydans_xylosoxydans_OX=85698_GN=ERS369984_00910_PE=4_SV=1~~~tr|A0A6S6Z2L7|A0A6S6Z2L7_9BURK_Methyltranfer_dom_domain-containing_protein_OS=Achromobacter_animicus_OX=1389935_GN=LMG26690_00059_PE=4_SV=1~~~tr|A0A6S7BST5|A0A6S7BST5_9BURK_Methyltranfer_dom_domain-containing_protein_OS=Achromobacter_pulmonis_…
3	n39587	1	0	39	1	15	0	0	3.78127e-08	0.00047463	0.706187	6.25023	TCTGGTCAATCCGGTGGAAATCGAACAGGTAGTCGAAACCCTGCCGGGCGTGCGCGCCTGC	61	tr|A0A848NCM4|A0A848NCM4_9BURK_DUF2848_family_protein_OS=Achromobacter_ruhlandii_OX=72557_GN=HGQ98_15595_PE=4_SV=1~~~tr|A0A6S7BUV7|A0A6S7BUV7_9BURK_Long-chain-fatty-acid--CoA_ligase_OS=Achromobacter_ruhlandii_OX=72557_GN=lcfB_1_PE=4_SV=1~~~tr|A0A5K4XXI8|A0A5K4XXI8_ALCXX_Long-chain_fatty_acid--CoA_ligase_OS=Alcaligenes_xylosoxydans_xylosoxydans_OX=85698_GN=AL520_01755_PE=4_SV=1~~~tr|A0A0Q8BPE3|A0A…
3	n39624	1	0	39	1	15	0	0	3.78127e-08	0.00047463	0.706187	6.25023	ACTCACTAAATCGAATCAACAAGGGGAAAAACATGAGATCGAGTTGGAGATTCAGCG	57
3	n39625	1	0	39	1	15	0	0	3.78127e-08	0.00047463	0.706187	6.25023	GATACTGCAAGCCTTCGACAAATCGAATCACCAGGTCGGCGGCTTCATCGAAGGCGCCAGG	61	tr|A0A2I8DGZ3|A0A2I8DGZ3_9BURK_Microcystinase_C_OS=Achromobacter_sp._AONIH1_OX=1758194_GN=C2U31_12005_PE=3_SV=1~~~tr|A0A0M7CBS0|A0A0M7CBS0_9BURK_Microcystinase_C_OS=Achromobacter_aegrifaciens_OX=1287736_GN=ERS370000_00229_PE=3_SV=1~~~tr|A0A6S7CI89|A0A6S7CI89_9BURK_tRNA_nuclease_CdiA_OS=Achromobacter_ruhlandii_OX=72557_GN=cdiA1_PE=4_SV=1~~~tr|A0A5K6ELB0|A0A5K6ELB0_ALCXX_Hemagglutinin_OS=Alcaligene…
3	n39693	1	0	39	1	15	0	0	3.78127e-08	0.00047463	0.706187	6.25023	GGCGCCCAGCCGCTCGGCCAGGAAATCGACAAAGGCGCGCAGCTTGGGCAGCGGGTGCCTG	61	tr|A0A6S7CN42|A0A6S7CN42_9BURK_HTH-type_transcriptional_regulator_PgrR_OS=Achromobacter_anxifer_OX=1287737_GN=pgrR_5_PE=3_SV=1~~~tr|A0A6S6YMY9|A0A6S6YMY9_9BURK_HTH-type_transcriptional_regulator_PgrR_OS=Achromobacter_pestifer_OX=1353889_GN=pgrR_1_PE=3_SV=1~~~tr|A0A4Q1HGW1|A0A4Q1HGW1_9BURK_LysR_family_transcriptional_regulator_OS=Achromobacter_aloeverae_OX=1750518_GN=C7R54_17650_PE=3_SV=1~~~tr|A0A…
3	n39793	1	0	39	1	15	0	0	3.78127e-08	0.00047463	0.706187	6.25023	CCTATGAGAAATTCACATCGATATTTTCGACTTTCTGGCGAAATCGACTAATTCAACCAAGGAACCGATCTGCAATTTGGTCATTATCCT	90	tr|A0A0X8BVS1|A0A0X8BVS1_9PSED_LuxR_family_transcriptional_regulator_OS=Pseudomonas_monteilii_OX=76759_GN=APT63_12955_PE=4_SV=1~~~tr|A0A0X8BU68|A0A0X8BU68_9PSED_LuxR_family_transcriptional_regulator_OS=Pseudomonas_monteilii_OX=76759_GN=APT63_08195_PE=4_SV=1~~~tr|A0A6S7A731|A0A6S7A731_9BURK_Virulence_factors_putative_positive_transcription_regulator_BvgA_OS=Achromobacter_deleyi_OX=1353891_GN=bvgA_…
3	n40028	1	0	39	1	15	0	0	3.78127e-08	0.00047463	0.706187	6.25023	CGGCAGGAATTGCTGGAGCTTTTCGTCCACAGACCGGGAAATCGATTCCAGGCGTGGCGCCAGCGAGTCGGTGGGGTCGGCCCCC	85	tr|A0A366G1S2|A0A366G1S2_9BURK_Small-conductance_mechanosensitive_channel_OS=Achromobacter_marplatensis_OX=470868_GN=DFP87_10321_PE=3_SV=1~~~tr|J4Y3U6|J4Y3U6_9BURK_Mechanosensitive_ion_channel_OS=Achromobacter_marplatensis_OX=470868_GN=QWC_26283_PE=3_SV=1~~~tr|A0A2S8V7L7|A0A2S8V7L7_9BURK_Mechanosensitive_ion_channel_protein_MscS_OS=Achromobacter_sp._MYb9_OX=1827284_GN=CQ050_20875_PE=3_SV=1~~~tr|A…
3	n40087	1	0	39	1	15	0	0	3.78127e-08	0.00047463	0.706187	6.25023	AAAGCGAAAAGTCCATGTGATCTATCCTTGAGTATGGGTACGCAGCAGCCGGTAGGGGTCCTGCAGCAATTCGATGACGTGATTGAGGAATTTCAGTGCGCCCGCACCGTCGTGCAGCCTATGGTCCGCTGCCAGCGCCAAGCCCATTTCGCGCCGCAGCGCGGGCGCGCCTTGCGAGTCGGGCCGGAATATCTCGCGAATGCTGCCCACGCCCAGGATGGCCGACTGGGGCGGGTTGATGATGGGCGTCATGTATGTGACGTTGAACATGCCCGCGTTGGAAATCGAGATGGCGCCGCCAATCATGTCCTCACGGGTGGCATTGCCCGAGCGCACGCGTTCGAGCAATGCATCCGACTGCCGTGCGATGCCGTCCAGCGTGGCGCCTGCCAGCCCGTG…	1212	tr|A0A424WAX9|A0A424WAX9_ALCXX_Acetyl-CoA_carboxylase_biotin_carboxyl_carrier_protein_subunit_OS=Alcaligenes_xylosoxydans_xylosoxydans_OX=85698_GN=DY367_17475_PE=4_SV=1~~~tr|A0A0M7MAT9|A0A0M7MAT9_9BURK_Biotinylated_protein_TB7.3_OS=Achromobacter_aegrifaciens_OX=1287736_GN=ERS370000_05890_PE=4_SV=1~~~tr|A0A658A4M7|A0A658A4M7_ALCXX_Acetyl-CoA_carboxylase_biotin_carboxyl_carrier_protein_subunit_OS=A…
3	n40153	1	0	39	1	15	0	0	3.78127e-08	0.00047463	0.706187	6.25023	TCAGGAAATCGAGGTATTGGCGGCATATGTGGCCAAGGCGACTGGGGGGCAGCCCTGAGCG	61	tr|A0A1R1K2D8|A0A1R1K2D8_ALCXX_Multidrug_transporter_subunit_MdtC_OS=Alcaligenes_xylosoxydans_xylosoxydans_OX=85698_GN=BIZ92_04305_PE=4_SV=1~~~tr|A0A0M7HX15|A0A0M7HX15_9BURK_Cytochrome_c,_mono-and_diheme_variants_OS=Achromobacter_aegrifaciens_OX=1287736_GN=ERS370000_02931_PE=4_SV=1~~~tr|A0A658AFG2|A0A658AFG2_ALCXX_Cytochrome_C_OS=Alcaligenes_xylosoxydans_xylosoxydans_OX=85698_GN=DAI43_15610_PE=4_…
3	n40155	1	0	39	1	15	0	0	3.78127e-08	0.00047463	0.706187	6.25023	GAAATCGAGGTATGCCAGCACATCCTGAAGTGTCCAGCGGCCCGGCTGAACCACACTGAACTTCTCGCAGTACCATCTCAGCCGAACCATCTCGGAACGATAGGAGCTCAACGTAC	116	tr|A0A5N7ZW95|A0A5N7ZW95_9BURK_ABC_transporter_ATP-binding_protein_OS=Achromobacter_sp._OX=134375_GN=E2603_25605_PE=4_SV=1~~~tr|A0A3R9H0D2|A0A3R9H0D2_ACHDE_ABC_transporter_ATP-binding_protein_OS=Achromobacter_denitrificans_OX=32002_GN=FOC81_27945_PE=4_SV=1~~~tr|A0A1N7P135|A0A1N7P135_9BURK_Site-specific_recombinase_XerD_OS=Achromobacter_sp._MFA1_R4_OX=1881016_GN=SAMN05428937_0359_PE=4_SV=1~~~tr|A0…
3	n40234	1	0	39	1	15	0	0	3.78127e-08	0.00047463	0.706187	6.25023	CCGCCCGGCGCCCGGTGCCGGCCGTAATCGCAGGCTGACACCAGACGAACAGGGCCGCCTGCTCAACGCCGTAGACAAGCACTCGAACCCCATGTTCAGCTGGATTGTGCGCATCGCTATCGAGACCGGGATGCGACTCTCCGAAATCGCCACCTTGCGCCTGCGGCAAGTAGACATCGCCAGAC	185	tr|A0A848NDT5|A0A848NDT5_9BURK_Site-specific_integrase_OS=Achromobacter_ruhlandii_OX=72557_GN=HGQ98_02375_PE=4_SV=1~~~tr|A0A4Q1HK13|A0A4Q1HK13_9BURK_Integrase_OS=Achromobacter_aloeverae_OX=1750518_GN=C7R54_13165_PE=4_SV=1~~~tr|A0A7Y4K4U5|A0A7Y4K4U5_9BURK_Site-specific_integrase_OS=Achromobacter_deleyi_OX=1353891_GN=HLG70_07015_PE=4_SV=1~~~tr|D4X3J6|D4X3J6_9BURK_Site-specific_recombinase,_phage_in…
3	n40291	1	0	39	1	15	0	0	3.78127e-08	0.00047463	0.706187	6.25023	CAGCAGCAGGATGCGGTCCGAAATCGCCATGGCTTCGCTCTGGTCGTGGGTCACCATCAAG	61	tr|A0A6N0JFQ3|A0A6N0JFQ3_ACHDE_ABC_transporter_ATP-binding_protein_OS=Achromobacter_denitrificans_OX=32002_GN=FOC81_03980_PE=4_SV=1~~~tr|A0A5N7ZIU2|A0A5N7ZIU2_9BURK_ABC_transporter_ATP-binding_protein_OS=Achromobacter_sp._OX=134375_GN=E2603_07540_PE=4_SV=1~~~tr|A0A6S6Z2P1|A0A6S6Z2P1_9BURK_Vitamin_B12_import_ATP-binding_protein_BtuD_OS=Achromobacter_pestifer_OX=1353889_GN=btuD_3_PE=4_SV=1~~~tr|A0A…
3	n40407	1	0	39	1	15	0	0	3.78127e-08	0.00047463	0.706187	6.25023	GCGCGCGGAAATCGCCGAACTGTCCGCGGGTACCTTCCTGCAGGATGCGCCGCTATACGCCGTATGCGCGTCGCAGGCCGGCGAC	85	tr|A0A6S6ZV39|A0A6S6ZV39_9BURK_Peripla_BP_6_domain-containing_protein_OS=Achromobacter_pestifer_OX=1353889_GN=LMG3431_01780_PE=4_SV=1~~~tr|A0A2S5GMK3|A0A2S5GMK3_9BURK_Selenocysteine-specific_translation_elongation_factor_OS=Achromobacter_spanius_OX=217203_GN=selB_PE=4_SV=1~~~tr|A0A6S7CT86|A0A6S7CT86_9BURK_SelB_translation_factor_OS=Achromobacter_piechaudii_OX=72556_GN=selB_PE=4_SV=1~~~tr|A0A1R1K3…
3	n40615	1	0	39	1	15	0	0	3.78127e-08	0.00047463	0.706187	6.25023	GGTCTTCGCCGAGACCCTGGGCGAAGTCCGGTCCAGCGGGCTGACCTCGGCCATCGGCGTGCAAAGCACGATGTGCACTCCGGCCTTGGCGCATCATGGCAGCGATGCGCTCAAGCGCGCCTACCTGGCGCCCACCATCGCGGGAGATCTGGTCGGCTGCATCGGCGTAAGCGAAGCCTCGGCAGGCTCGGACGTGTCGCAGATAAAGACCTGGGCGCGGCGCGACGGCGACGACTACGTCATCAACGGATCGAAGATGTGGATCACCAATGGCGTGCAGGGCGACTGGATCTGCCTGCTGTGCAATACCTCGCAGGACGGCGGACCGCACAAGAACAAATCGCTCATCATCGTGCCATTGAACGCTCCCGGCGTCAGCGTGTCGCGCAAGCTGGACAA…	553	tr|A0A6N0JY22|A0A6N0JY22_ACHDE_Acyl-CoA_dehydrogenase_family_protein_OS=Achromobacter_denitrificans_OX=32002_GN=FOC81_30400_PE=3_SV=1~~~tr|A0A8B5V2M4|A0A8B5V2M4_9BURK_Uncharacterized_protein_OS=Achromobacter_sp._SLBN-14_OX=2768442_GN=FBY20_5293_PE=4_SV=1~~~tr|A0A854PYL6|A0A854PYL6_9BURK_Acyl-CoA_dehydrogenase_OS=Achromobacter_sp._KAs_3-5_OX=1915388_GN=BMR85_020535_PE=4_SV=1~~~tr|H0F8K6|H0F8K6_9BU…
3	n40686	1	0	39	1	15	0	0	3.78127e-08	0.00047463	0.706187	6.25023	GAAATCGCTGTCCCCCGCCACCAGCAGCATGGGCAGCGCGGCGCCGTCCGCGCCCTGGGCG	61	tr|A0A0M7FEU1|A0A0M7FEU1_9BURK_Gliding-associated_putative_ABC_transporter_substrate-binding_component_GldG_OS=Achromobacter_aegrifaciens_OX=1287736_GN=ERS370000_01734_PE=4_SV=1~~~tr|A0A6S6Z1B6|A0A6S6Z1B6_9BURK_ABC_transp_aux_domain-containing_protein_OS=Achromobacter_pestifer_OX=1353889_GN=LMG3431_02703_PE=4_SV=1~~~tr|A0A6S7C5G4|A0A6S7C5G4_9BURK_ABC_transp_aux_domain-containing_protein_OS=Achrom…
3	n40901	1	0	39	1	15	0	0	3.78127e-08	0.00047463	0.706187	6.25023	TGTCCTTGACCAGATCGTTGTCGCAGCCGCCCAGCAGCACGTCGTAGAAATCGCGCTTTGCCGCCAGCAGCGCCGACTTGTTGCTGCCCTTGGCCTGGCGGTGCAGGGCATCCACCGCCTTGCGCAGGCGCTCGACATCGGCGTCGCTCGCCAGGCGCGCGAATTCATGCGCGGCATAGCCTTCCAGCAGGGCGCGCAGGGCGTAGAGATCGCGGGCGGCCTTTTCGGTGATGCGCATCACGGTAGGACCGCGGTGCGGCTCGATCGTGATCAGGCGTTCGGCTTCCAGCGTGCGCAGCGCTTCGCGC	308	tr|A0A1R1JW59|A0A1R1JW59_ALCXX_GntR_family_transcriptional_regulator_OS=Alcaligenes_xylosoxydans_xylosoxydans_OX=85698_GN=BIZ92_22510_PE=4_SV=1~~~tr|A0A2S0IEA3|A0A2S0IEA3_9BURK_GntR_family_transcriptional_regulator_OS=Achromobacter_spanius_OX=217203_GN=CLM73_24965_PE=4_SV=1~~~tr|A0A6S6ZF05|A0A6S6ZF05_9BURK_HTH_gntR-type_domain-containing_protein_OS=Achromobacter_animicus_OX=1389935_GN=LMG26690_01…
3	n40908	1	0	39	1	15	0	0	3.78127e-08	0.00047463	0.706187	6.25023	CATCACGGTGGGCTCGACGTCGGCGGGAAATGCGAAATCGCGCTTGCTGTCCGCGCCGCGCGTCACC	67	tr|A0A0M7JPV9|A0A0M7JPV9_9BURK_D-alanine_aminotransferase_OS=Achromobacter_aegrifaciens_OX=1287736_GN=dat_1_PE=4_SV=1~~~tr|A0A6S7CHJ9|A0A6S7CHJ9_9BURK_D-alanine_aminotransferase_OS=Achromobacter_anxifer_OX=1287737_GN=dat_1_PE=4_SV=1~~~tr|E3HQ21|E3HQ21_ACHXA_Aminotransferase_class_IV_family_protein_2_OS=Achromobacter_xylosoxidans_(strain_A8)_OX=762376_GN=AXYL_03859_PE=4_SV=1~~~tr|A0A424W4A8|A0A424…
3	n41015	1	0	39	1	15	0	0	3.78127e-08	0.00047463	0.706187	6.25023	GCAGCCGCTGGAAATCGCGGAGGACGTGTATCGCTGCTATAACGCGGGCGCCAGCGTGGTG	61	tr|A0A7X9VXQ4|A0A7X9VXQ4_9BURK_3-keto-5-aminohexanoate_cleavage_protein_OS=Achromobacter_sp._Bel_OX=2727415_GN=HG262_02805_PE=4_SV=1~~~tr|J4J8Z4|J4J8Z4_9BURK_Uncharacterized_protein_OS=Achromobacter_marplatensis_OX=470868_GN=QWC_02299_PE=4_SV=1~~~tr|A0A366FNZ0|A0A366FNZ0_9BURK_Uncharacterized_protein_(DUF849_family)_OS=Achromobacter_marplatensis_OX=470868_GN=DFP87_11150_PE=4_SV=1~~~tr|A0A6S7A0A7|…
3	n41091	1	0	39	1	15	0	0	3.78127e-08	0.00047463	0.706187	6.25023	GCGGGAAATCGTGCTGGCGGCCACGCGCCAACAGGCCTAATGCATCCGTTGCCGTGGCCGCATGACGTTCAGCCCTGCGCCTCCGCGCGCAGCGCGGCCCGCACCGCAGGGCGCTCTCCGATGCGGGCCGCGTATGCCGCCAGGGATGGCCAGCGATCCAGGTCGATCGCAAAGAACCTGCACCATCCCAGCACGGTAAACAGATAGGCATCGGCCACGCTGAACTGCTGGCCCATCAAGTAGGTGCTTTCGGCCAGGATGCCGTCCAGGTAGTCGAAGCGCTTGAAGAGCCGTTCGCGGAAATGCGCCTTGGCGGCTTCGGGCAAGGCCGACTGGAACAAGGGCGCCGACCCTGCGTGGATCTCGCTGGTTAGGAAGTTCAGCCATTCCTGCAACCGC…	1922	tr|A0A246Q420|A0A246Q420_9BURK_LysR_family_transcriptional_regulator_OS=Achromobacter_sp._HZ28_OX=2015171_GN=CEY04_17635_PE=3_SV=1~~~tr|A0A1R1JQI4|A0A1R1JQI4_ALCXX_HTH_lysR-type_domain-containing_protein_OS=Alcaligenes_xylosoxydans_xylosoxydans_OX=85698_GN=BIZ92_11495_PE=3_SV=1~~~tr|A0A7U0E7E2|A0A7U0E7E2_ALCXX_LysR_family_transcriptional_regulator_OS=Alcaligenes_xylosoxydans_xylosoxydans_OX=85698…
3	n41158	1	0	39	1	15	0	0	3.78127e-08	0.00047463	0.706187	6.25023	GACCCGGCGCGCCTTGTTGCGGCGCGCGAAATCGTAGACCGCATTCGAATGGTGGCCGCCGCTGTCAATGGCCGTGGCGTAGATACTCATCTGCTGGCCGCCTTCATGCTGGAAGCGCCGCTCGAACAGGTAA	133	tr|A0A446CFG6|A0A446CFG6_9BURK_Uncharacterized_protein_OS=Achromobacter_veterisilvae_OX=2069367_GN=AVE30378_02156_PE=4_SV=1~~~tr|A0A7U0ECG2|A0A7U0ECG2_ALCXX_Phage_terminase_large_subunit_family_protein_OS=Alcaligenes_xylosoxydans_xylosoxydans_OX=85698_GN=I6I48_15030_PE=3_SV=1~~~tr|A0A6N0JN36|A0A6N0JN36_ACHDE_Phage_terminase_large_subunit_family_protein_OS=Achromobacter_denitrificans_OX=32002_GN=F…
3	n41167	1	0	39	1	15	0	0	3.78127e-08	0.00047463	0.706187	6.25023	CATCAGGCCGCCCATGCCCTGGATCAGGAAATCGTAGCCCGGCCGGTTGGCATAAGGGCCGTCCTGGCCGAAGCCGGTGATGGAGCAA	88	tr|A0A6S7CIK0|A0A6S7CIK0_9BURK_Formyl-CoA:oxalate_CoA-transferase_OS=Achromobacter_piechaudii_OX=72556_GN=frc_2_PE=4_SV=1~~~tr|A0A446C8G9|A0A446C8G9_9BURK_Succinyl-CoA--L-malate_CoA-transferase_beta_subunit_OS=Achromobacter_veterisilvae_OX=2069367_GN=smtB_1_PE=4_SV=1~~~tr|A0A095X8V4|A0A095X8V4_9BURK_CoA-transferase_OS=Achromobacter_sp._RTa_OX=1532557_GN=JL37_09440_PE=4_SV=1~~~tr|A0A446C595|A0A446…
3	n41490	1	0	39	1	15	0	0	3.78127e-08	0.00047463	0.706187	6.25023	CGTGCGCGCCAATGTGCTGGAAATCGTGGATGGACGCCTGACCGGCCGGCTGCTGCCGCAA	61	tr|A0A8B5UU55|A0A8B5UU55_9BURK_Phosphoserine_phosphatase_OS=Achromobacter_sp._SLBN-14_OX=2768442_GN=FBY20_0961_PE=4_SV=1~~~tr|A0A176XNJ7|A0A176XNJ7_ALCXX_O-phosphoserine_phosphohydrolase_OS=Alcaligenes_xylosoxydans_xylosoxydans_OX=85698_GN=A7J67_22545_PE=3_SV=1~~~tr|A0A854PYP1|A0A854PYP1_9BURK_Phosphoserine_phosphatase_SerB_OS=Achromobacter_sp._KAs_3-5_OX=1915388_GN=serB_PE=4_SV=1~~~tr|A0A811GX60…
3	n41559	1	0	39	1	15	0	0	3.78127e-08	0.00047463	0.706187	6.25023	CGTCGGCGAAATCGTGGCGCGCGGCCCGATTGTGCACGGCACGCCCAGGCGGGAAGCGCTG	61	tr|A0A6S6ZLR3|A0A6S6ZLR3_9BURK_Glutathione_import_ATP-binding_protein_GsiA_OS=Achromobacter_pestifer_OX=1353889_GN=gsiA_13_PE=4_SV=1~~~tr|A0A848NCH7|A0A848NCH7_9BURK_ABC_transporter_ATP-binding_protein_OS=Achromobacter_ruhlandii_OX=72557_GN=HGQ98_02965_PE=4_SV=1~~~tr|F7T537|F7T537_9BURK_ABC_transporter_family_protein_31_OS=Achromobacter_insuavis_AXX-A_OX=1003200_GN=AXXA_20309_PE=4_SV=1~~~tr|A0A6J…
3	n41947	1	0	39	1	15	0	0	3.78127e-08	0.00047463	0.706187	6.25023	CGCCCCACCGAGCCGTGTCTGCCCCATAAACGTCGTGGTACACCGCCGCCCCCAACTGGACTAGGCGTGCCGTACGCAAATCGGCGGGCATGTGTTGTAAGTACCCAGCTAGGACGACAATCTCTTCCGTCGTCAATCCGGCAAGCGTATCGGCCCAACGGTAGAATTCATCCGCAAAAACGGCCTCGTGGGCGAGCTGGCCGGCGAGCACGGCCGCCAGCATG	224	tr|A0A1N7P1R5|A0A1N7P1R5_9BURK_Uncharacterized_protein_OS=Achromobacter_sp._MFA1_R4_OX=1881016_GN=SAMN05428937_0383_PE=4_SV=1~~~tr|A0A446CXS3|A0A446CXS3_9BURK_Protein_MgtC_OS=Achromobacter_veterisilvae_OX=2069367_GN=AVE30378_05273_PE=3_SV=1~~~tr|A0A6S6Z8C0|A0A6S6Z8C0_9BURK_Protein_MgtC_OS=Achromobacter_kerstersii_OX=1353890_GN=LMG3441_00882_PE=3_SV=1~~~tr|A0A176XQA9|A0A176XQA9_ALCXX_Uncharacteriz…
3	n41974	1	0	39	1	15	0	0	3.78127e-08	0.00047463	0.706187	6.25023	CTACTCGGAACAGCGTTCGCTGGAAATCGGTATGACGCTGGCCTCGCGCCCCAAGGTCATC	61	tr|A0A448C3G4|A0A448C3G4_9BURK_Lipopolysaccharide_export_system_ATP-binding_protein_LptB_OS=Achromobacter_spanius_OX=217203_GN=lptB_5_PE=4_SV=1~~~tr|H0FFS0|H0FFS0_9BURK_ABC_transporter_OS=Achromobacter_arsenitoxydans_SY8_OX=477184_GN=KYC_28202_PE=4_SV=1~~~tr|A0A0Q8WU44|A0A0Q8WU44_9BURK_ABC_transporter_ATP-binding_protein_OS=Achromobacter_sp._Root83_OX=1736602_GN=ASE30_10270_PE=4_SV=1~~~tr|A0A6S7A…
3	n41978	1	0	39	1	15	0	0	3.78127e-08	0.00047463	0.706187	6.25023	GTTCTCCATCGTGCCCGACATCACGACCAGTTCCCTGAACATAGGCGGAGGCAGCGGATCGGTCTCGGGGTCCAGCGAATTCGCCATGACGCAGCTGGGCGGCGGCGACACCATCTCCAAATCGGTCCCCATCTACCTGGAAGGCGTGCTGGCCGCCAGCCGCTACGATCCGACCTTCGTCGCCACG	187	tr|A0A7T4B3V6|A0A7T4B3V6_9BURK_CoA_transferase_OS=Achromobacter_deleyi_OX=1353891_GN=I6I07_00795_PE=4_SV=1~~~tr|A0A0X8NYX7|A0A0X8NYX7_ALCXX_Formyl-CoA_transferase_OS=Alcaligenes_xylosoxydans_xylosoxydans_OX=85698_GN=AL504_12950_PE=4_SV=2~~~tr|A0A5K4ZDF0|A0A5K4ZDF0_ALCXX_CoA_transferase_OS=Alcaligenes_xylosoxydans_xylosoxydans_OX=85698_GN=AL520_00205_PE=4_SV=1~~~tr|A0A2M9H4N3|A0A2M9H4N3_9BURK_Form…
3	n42119	1	0	39	1	15	0	0	3.78127e-08	0.00047463	0.706187	6.25023	GAAGTGAAATCGGGCTATGGGCTGGACCTGGCCAACGAGCGCAAGATGCTCAGGGTGGCGC	61	tr|A0A0D6FK73|A0A0D6FK73_ALCXX_Imidazolonepropionase_OS=Alcaligenes_xylosoxydans_xylosoxydans_OX=85698_GN=hutI_PE=3_SV=1~~~tr|A0A0M7IW52|A0A0M7IW52_9BURK_Imidazolonepropionase_OS=Achromobacter_aegrifaciens_OX=1287736_GN=hutI_PE=3_SV=1~~~tr|A0A446CIA5|A0A446CIA5_9BURK_Imidazolonepropionase_OS=Achromobacter_veterisilvae_OX=2069367_GN=hutI_3_PE=3_SV=1~~~tr|A0A5N7ZFL6|A0A5N7ZFL6_9BURK_Imidazoloneprop…
3	n42246	1	0	39	1	15	0	0	3.78127e-08	0.00047463	0.706187	6.25023	GACGACCAGGTTGGTTGCCTGGGGCGAGACGTCGCACGGGGCGTCGACGATTTCGCCAATGAAATTAATACGCCCGTCTTCGGCCCAGGCGGTTTGGGAAATAGCGGCTGCCGTGGCGAGCAGGGCAAACTTG	133	tr|A0A2S8VGU3|A0A2S8VGU3_9BURK_Fimbria_A_protein_OS=Achromobacter_sp._MYb9_OX=1827284_GN=CQ050_08385_PE=4_SV=1~~~tr|A0A6S6YZW8|A0A6S6YZW8_9BURK_Fimbria_A_protein_OS=Achromobacter_pestifer_OX=1353889_GN=smfA_PE=4_SV=1~~~tr|A0A7X9W3J1|A0A7X9W3J1_9BURK_Type_1_fimbrial_protein_OS=Achromobacter_sp._Bel_OX=2727415_GN=HG262_19205_PE=4_SV=1~~~tr|J4YLL8|J4YLL8_9BURK_Fimbrial_protein_OS=Achromobacter_marpl…
3	n42315	1	0	39	1	15	0	0	3.78127e-08	0.00047463	0.706187	6.25023	ATGAAGAAATTATCAGCCTCTTGCATTCTGGCCGTTGGCATTGCCGCGACGTCGGCCGCCTTCGCACAAATCCCCGTGA	79	tr|A0A2N8KJL0|A0A2N8KJL0_9BURK_P-type_DNA_transfer_protein_VirB5_OS=Achromobacter_pulmonis_OX=1389932_GN=virB5_PE=4_SV=1~~~tr|A0A7Y4K543|A0A7Y4K543_9BURK_P-type_DNA_transfer_protein_VirB5_OS=Achromobacter_deleyi_OX=1353891_GN=virB5_PE=4_SV=1~~~tr|A0A095UP27|A0A095UP27_9BURK_Type_IV_secretion_protein_VirB5_OS=Achromobacter_sp._RTa_OX=1532557_GN=JL37_21405_PE=4_SV=1~~~tr|A0A4Q1HLC2|A0A4Q1HLC2_9BURK…
3	n42376	1	0	39	1	15	0	0	3.78127e-08	0.00047463	0.706187	6.25023	GTGAAGGCCTGGACGATGTCGGCGGGGATGTTGGAGGTGCCGGAAGCGGCGGGAGCGTCTGAAAGGGCGGTAGTGTTGGAAATCGCGGTCATTGCAGTCTTGGGAGTGGATGGTGGGAAATTCAAAGGCGGTGGCCGCCGACTCACACGCTGTAGCGCCCCGCACCCGGC	170	tr|A0A6S7CK04|A0A6S7CK04_9BURK_PBPb_domain-containing_protein_OS=Achromobacter_ruhlandii_OX=72557_GN=LMG3328_00964_PE=4_SV=1~~~tr|A0A6S7D3K5|A0A6S7D3K5_9BURK_PBPb_domain-containing_protein_OS=Achromobacter_dolens_OX=1287738_GN=LMG26841_00948_PE=4_SV=1~~~tr|A0A0D6HYZ0|A0A0D6HYZ0_ALCXX_Cystine_transporter_subunit_OS=Alcaligenes_xylosoxydans_xylosoxydans_OX=85698_GN=ERS451415_03554_PE=4_SV=1~~~tr|A0…
3	n42439	1	0	39	1	15	0	0	3.78127e-08	0.00047463	0.706187	6.25023	GGGAATGCGTATCTGCGCAAATTCACTCAGAGCCGCCGCCAGGCCCGCGTCCGGGCCGTTCAGG	64	tr|A0A0M7IAY6|A0A0M7IAY6_9BURK_3-hydroxybenzoate_6-hydroxylase_1_OS=Achromobacter_aegrifaciens_OX=1287736_GN=xlnD_2_PE=4_SV=1~~~tr|E3HVV6|E3HVV6_ACHXA_FAD_binding_domain_protein_8_OS=Achromobacter_xylosoxidans_(strain_A8)_OX=762376_GN=AXYL_02949_PE=4_SV=1~~~tr|A0A7D4E195|A0A7D4E195_9BURK_FAD-dependent_monooxygenase_OS=Achromobacter_pestifer_OX=1353889_GN=FOC84_30960_PE=4_SV=1
3	n42511	1	0	39	1	15	0	0	3.78127e-08	0.00047463	0.706187	6.25023	CGGGTTCCGAGGCACGCCCGGCATCGTGGTACGGGAGAGCGACGGCTCGGTCAAGAAATTCAGAGGCATGCCCCAGGGTGCGCAATTGGCCGAGGTGTTGGGGCCGCGCTGAATCCAAGACGGAATCCGCCTTGAACGCCAAGGCACGCAGGCGAGGAGGGCGGTAGCGAAAACCTATGCCTTCCGCGCTCGGATT	196	tr|A0A0L8EKZ1|A0A0L8EKZ1_9BURK_Histidine_kinase_OS=Achromobacter_sp._DMS1_OX=1688405_GN=AD428_23380_PE=4_SV=1~~~tr|A0A0X8BVR4|A0A0X8BVR4_9PSED_Thiol:disulfide_interchange_protein_OS=Pseudomonas_monteilii_OX=76759_GN=APT63_12895_PE=3_SV=1~~~tr|A0A658ACD2|A0A658ACD2_ALCXX_Thiol:disulfide_interchange_protein_OS=Alcaligenes_xylosoxydans_xylosoxydans_OX=85698_GN=DAI43_15575_PE=3_SV=1~~~tr|A0A0M7HZR1|A…
3	n42804	1	0	39	1	15	0	0	3.78127e-08	0.00047463	0.706187	6.25023	GCGAAATTCCGCTACCTATACTGATTTTCCTACCCATGGGCGCGGCCGCAAGGAGCCGGCGCGCCCTTGAAGAATCAGAATAGCCGGAGGCTGGATGGACGC	102	tr|A0A2S0I7V0|A0A2S0I7V0_9BURK_Microcin_ABC_transporter_ATP-binding_protein_OS=Achromobacter_spanius_OX=217203_GN=CLM73_13700_PE=4_SV=1
3	n42829	1	0	39	1	15	0	0	3.78127e-08	0.00047463	0.706187	6.25023	CACCGAAATTCCGGCACTTCTTGCCTGCTCGAATACTCGGTTCATCGCCATCAAGGCGTAGGCGCCGAACTCGTCCAGCAGGGCAAGATATGGGATACGCGATCGGTGCGACTTC	115	tr|A0A6S7D3V8|A0A6S7D3V8_9BURK_HTH-type_transcriptional_regulator_GltC_OS=Achromobacter_pulmonis_OX=1389932_GN=gltC_8_PE=3_SV=1~~~tr|A0A1N7P3R5|A0A1N7P3R5_9BURK_TraM_recognition_site_of_TraD_and_TraG_OS=Achromobacter_sp._MFA1_R4_OX=1881016_GN=SAMN05428937_0439_PE=4_SV=1~~~tr|E3HYK6|E3HYK6_ACHXA_TraG-D_C_domain-containing_protein_OS=Achromobacter_xylosoxidans_(strain_A8)_OX=762376_GN=AXYL_06878_PE…
3	n42839	1	0	39	1	15	0	0	3.78127e-08	0.00047463	0.706187	6.25023	CACGGCAACGATCTGGCTCTCTGTAAATCTACTTTTCTTCAAGGGAGTCTCCGACTCAGGGAGGCTCAGAAATTCTACCGGCTGGTGTCTACCTTAAGGGGGAGCTTACGCAGCGACCTGCAATGAATGGCTAACGATGCCAGGGCCGGCAGGGCTTACTGGACGCCTGGTTCAACTTGGTCGAAAACTTCGAAACTTGCGGCAGCAATGGAATATCGTCGCAAAATGCTAAACAGCGCGCGCGGCTCAGGCGGCCTGCTTCTCAGC	267	tr|A0A6S7FK11|A0A6S7FK11_9BURK_Uncharacterized_protein_OS=Achromobacter_insolitus_OX=217204_GN=LMG6000_06505_PE=4_SV=1~~~tr|A0A6S7EB11|A0A6S7EB11_9BURK_Uncharacterized_protein_OS=Achromobacter_anxifer_OX=1287737_GN=LMG26858_04388_PE=4_SV=1~~~tr|A0A424W5I4|A0A424W5I4_ALCXX_Uncharacterized_protein_OS=Alcaligenes_xylosoxydans_xylosoxydans_OX=85698_GN=DY367_27570_PE=4_SV=1~~~tr|A0A658A6T3|A0A658A6T3_…
3	n42944	1	0	39	1	15	0	0	3.78127e-08	0.00047463	0.706187	6.25023	CTTCCCCGCCCCGCCAGGCTACACAAGCCCGAAATTCTGTGTATAATCGCTGTCTTTGGTGGAC	64	tr|A0A7Y4K457|A0A7Y4K457_9BURK_TRAP_transporter_large_permease_subunit_OS=Achromobacter_deleyi_OX=1353891_GN=HLG70_06000_PE=4_SV=1~~~tr|A0A7X9ZFN7|A0A7X9ZFN7_9BURK_FecR_family_protein_OS=Achromobacter_sp._Bel_OX=2727415_GN=HG262_20000_PE=4_SV=1
3	n43020	1	0	39	1	15	0	0	3.78127e-08	0.00047463	0.706187	6.25023	TAAACTTCATTTTGTAAATTCGCAACAAAGGACTATTGTTGAACGGAATTGACGAAAAATT	61
3	n43231	1	0	39	1	15	0	0	3.78127e-08	0.00047463	0.706187	6.25023	CGGCAAATTTAGCACGACCGTGCGAAATTGACCTGGCTTTTTTCAGGGTCGCGCCCCGAAAAAAAACCGGACAGCCAGGCTGTCCGGT	88
3	n43260	1	0	39	1	15	0	0	3.78127e-08	0.00047463	0.706187	6.25023	CCTTAGGGGCGCCAGCCTGACCATACGCAAATTTCCACAGCGGCGCCCCGGAATGTCCGAT	61	tr|A0A6S7ED83|A0A6S7ED83_9BURK_FHA_domain-containing_protein_OS=Achromobacter_pulmonis_OX=1389932_GN=LMG26788_04607_PE=3_SV=1~~~tr|A0A446CKP0|A0A446CKP0_9BURK_Conjugal_transfer_protein_OS=Achromobacter_agilis_OX=1353888_GN=AGI3411_03521_PE=3_SV=1~~~tr|A0A6S7DZT9|A0A6S7DZT9_9BURK_Putative_enoyl-CoA_hydratase_echA8_OS=Achromobacter_piechaudii_OX=72556_GN=echA8_4_PE=3_SV=1~~~tr|A0A0Q8XL20|A0A0Q8XL20…
3	n43352	1	0	39	1	15	0	0	3.78127e-08	0.00047463	0.706187	6.25023	TAAGTGTTGCTTTATTAAGTGTCAAGTGTTTATTAAATTTCGGAGGTCATGCGAGTCGCTCGGCCCAGGTGAA	73
3	n43455	1	0	39	1	15	0	0	3.78127e-08	0.00047463	0.706187	6.25023	GCTGTAGGGAAAGAGTTCTGATCGTCATGTAGTATCTCCGGGAAATTTGCCGCTGCTGGGCTAGGGGGCATTCTCTGTTCGCGTATCCGGTCTA	94	tr|J4YK58|J4YK58_9BURK_MHYT_domain-containing_protein_OS=Achromobacter_marplatensis_OX=470868_GN=QWC_18292_PE=4_SV=1~~~tr|A0A446CCY3|A0A446CCY3_9BURK_Signal-transduction_histidine_kinase_senX3_OS=Achromobacter_veterisilvae_OX=2069367_GN=senX3_1_PE=4_SV=1~~~tr|A0A3C1XTN1|A0A3C1XTN1_9BURK_Uncharacterized_protein_OS=Achromobacter_sp._OX=134375_GN=DCR74_02240_PE=4_SV=1
3	n43550	1	0	39	1	15	0	0	3.78127e-08	0.00047463	0.706187	6.25023	CCACGTCGATGCGGTCGCGCTTGAAATTGACCAATTTTGACGATGCAGCCACGCGAACCTCGCTGTCCGGATGCAAATAGCTGCGCTTATCTGA	94	tr|A0A6S7F6N0|A0A6S7F6N0_9BURK_Nucleotide-binding_protein_ExpZ_OS=Achromobacter_insolitus_OX=217204_GN=expZ_PE=4_SV=1~~~tr|A0A3S9YV99|A0A3S9YV99_9BURK_Transcriptional_regulator_GcvA_OS=Achromobacter_spanius_OX=217203_GN=gcvA_PE=3_SV=1~~~tr|A0A2D0AVC6|A0A2D0AVC6_9BURK_LysR_family_transcriptional_regulator_OS=Achromobacter_sp._HZ28_OX=2015171_GN=CEY04_23760_PE=3_SV=1~~~tr|A0A0Q8WPM7|A0A0Q8WPM7_9BUR…
3	n43710	1	0	39	1	15	0	0	3.78127e-08	0.00047463	0.706187	6.25023	GAAATTGCCCGCGGCGTTGTTGATGAGGCCGGTCAGCGGACCGTGCCCGGTCCAGATGGCG	61	tr|A0A6S7A8U0|A0A6S7A8U0_9BURK_Putative_2,4-dienoyl-CoA_reductase_OS=Achromobacter_deleyi_OX=1353891_GN=fadH_1_PE=4_SV=1~~~tr|A0A0D6I8T2|A0A0D6I8T2_ALCXX_Gluconate_5-dehydrogenase_OS=Alcaligenes_xylosoxydans_xylosoxydans_OX=85698_GN=gno_4_PE=4_SV=1~~~tr|A0A7T2RJU0|A0A7T2RJU0_ALCXX_SDR_family_oxidoreductase_OS=Alcaligenes_xylosoxydans_xylosoxydans_OX=85698_GN=I6G72_15175_PE=4_SV=1~~~tr|A0A7U0EEM6|…
3	n43807	1	0	39	1	15	0	0	3.78127e-08	0.00047463	0.706187	6.25023	CCTGATCCCCGACTTCATCCCCGTGCTGGGTTACATCGACGACGTGCTGTTGTTGCCCGGCCTGATCTGGCTGGCCATCAAATTGCTGCCGCCCGATGTGCTGCAGGAATGCAGAGGCCAGGCGGACGCCT	131	tr|A0A446CB32|A0A446CB32_9BURK_DUF1232_domain-containing_protein_OS=Achromobacter_agilis_OX=1353888_GN=AGI3411_01927_PE=4_SV=1~~~tr|A0A8B5V489|A0A8B5V489_9BURK_Uncharacterized_membrane_protein_YkvA_(DUF1232_family)_OS=Achromobacter_sp._SLBN-14_OX=2768442_GN=FBY20_4144_PE=4_SV=1~~~tr|A0A2S5GI29|A0A2S5GI29_9BURK_DUF1232_domain-containing_protein_OS=Achromobacter_spanius_OX=217203_GN=C4E15_30015_PE=…
3	n43816	1	0	39	1	15	0	0	3.78127e-08	0.00047463	0.706187	6.25023	CATGGGCGGCGAATACAAATTGCTGGCCACCTTCATCGTGCTGGTGGTGGTGCTGATGGTC	61	tr|A0A2I8DN21|A0A2I8DN21_9BURK_Branched-chain_amino_acid_ABC_transporter_permease_OS=Achromobacter_sp._AONIH1_OX=1758194_GN=C2U31_23765_PE=4_SV=1~~~tr|A0A658AA03|A0A658AA03_ALCXX_Uncharacterized_protein_(Fragment)_OS=Alcaligenes_xylosoxydans_xylosoxydans_OX=85698_GN=DAI43_29210_PE=4_SV=1~~~tr|A0A6S7CLT2|A0A6S7CLT2_9BURK_High-affinity_branched-chain_amino_acid_transport_system_permease_protein_Liv…
3	n43818	1	0	39	1	15	0	0	3.78127e-08	0.00047463	0.706187	6.25023	GCTTGCCCGCGACGCCGATACCGCCGCCAAATTGCTGGCCCAGCACCTGCGCCAGACCACGCAGCTGGTGCTGGCCCAAAT	81	tr|A0A7X9W7J8|A0A7X9W7J8_9BURK_FCD_domain-containing_protein_OS=Achromobacter_sp._Bel_OX=2727415_GN=HG262_29480_PE=4_SV=1~~~tr|J4PBX8|J4PBX8_9BURK_GntR_family_transcriptional_regulator_OS=Achromobacter_marplatensis_OX=470868_GN=DFP87_10114_PE=4_SV=1~~~tr|A0A2S8UYZ6|A0A2S8UYZ6_9BURK_Transcriptional_regulator_OS=Achromobacter_sp._MYb9_OX=1827284_GN=CQ050_27100_PE=4_SV=1~~~tr|A0A7Y4K7R1|A0A7Y4K7R1_9…
3	n44003	1	0	39	1	15	0	0	3.78127e-08	0.00047463	0.706187	6.25023	ATAGCCGCAGCCGAAATTGTCGCCGCGGTTAAAATCCTGCACGCGCGGAATGCCCTCCTGC	61	tr|A0A8B5V3B4|A0A8B5V3B4_9BURK_Choline_dehydrogenase_OS=Achromobacter_sp._SLBN-14_OX=2768442_GN=FBY20_4664_PE=4_SV=1~~~tr|E3HVX6|E3HVX6_ACHXA_GMC_oxidoreductase_family_protein_1_OS=Achromobacter_xylosoxidans_(strain_A8)_OX=762376_GN=AXYL_02969_PE=3_SV=1~~~tr|A0A6S7E3W9|A0A6S7E3W9_9BURK_Oxygen-dependent_choline_dehydrogenase_OS=Achromobacter_anxifer_OX=1287737_GN=betA_3_PE=3_SV=1~~~tr|A0A0Q8Y3U2|A…
3	n44110	1	0	39	1	15	0	0	3.78127e-08	0.00047463	0.706187	6.25023	CTCGCAAATTGTGGTGCCAGCCCGCACCTCAAGCTCGGCGCCTTCGGGCGCCAGCTCGGCA	61	tr|A0A2S5GRZ9|A0A2S5GRZ9_9BURK_2Fe-2S_ferredoxin_OS=Achromobacter_spanius_OX=217203_GN=fdx_PE=3_SV=1~~~tr|A0A0D6HVY6|A0A0D6HVY6_ALCXX_2Fe-2S_ferredoxin_OS=Alcaligenes_xylosoxydans_xylosoxydans_OX=85698_GN=fdx_1_PE=3_SV=1~~~tr|A0A5N7ZF21|A0A5N7ZF21_9BURK_2Fe-2S_ferredoxin_OS=Achromobacter_sp._OX=134375_GN=fdx_PE=3_SV=1~~~tr|A0A6N0JGH4|A0A6N0JGH4_ACHDE_2Fe-2S_ferredoxin_OS=Achromobacter_denitrifica…
3	n44240	1	0	39	1	15	0	0	3.78127e-08	0.00047463	0.706187	6.25023	TGTTGGACCGTAAATTGGGCGTCTTCAGCAGCGCCTCCCGCACGCGCGCCGTGGTAGTGAC	61	tr|A0A0D6I8W7|A0A0D6I8W7_ALCXX_BON_domain-containing_protein_OS=Alcaligenes_xylosoxydans_xylosoxydans_OX=85698_GN=osmY_2_PE=4_SV=1~~~tr|A0A0M7H0Z5|A0A0M7H0Z5_9BURK_Osmotically-inducible_protein_Y_OS=Achromobacter_aegrifaciens_OX=1287736_GN=osmY_2_PE=4_SV=1~~~tr|A0A658AGJ3|A0A658AGJ3_ALCXX_BON_domain-containing_protein_OS=Alcaligenes_xylosoxydans_xylosoxydans_OX=85698_GN=DAI43_06605_PE=4_SV=1~~~tr…
3	n44297	1	0	39	1	15	0	0	3.78127e-08	0.00047463	0.706187	6.25023	TCGCATGCAAATGAACCCGCCCGGCGCCGAAGACTCGCCGCGCATGGTGGTGGTGGGCGCC	61	tr|A0A446C592|A0A446C592_9BURK_Hydrogen_cyanide_synthase_subunit_HcnB_OS=Achromobacter_agilis_OX=1353888_GN=hcnB_1_PE=4_SV=1~~~tr|A0A0M9IGE7|A0A0M9IGE7_9BURK_sn-glycerol-3-phosphate_dehydrogenase_subunit_A_OS=Achromobacter_aegrifaciens_OX=1287736_GN=ERS370000_02475_PE=4_SV=1~~~tr|A0A7D4E0W5|A0A7D4E0W5_9BURK_FAD-dependent_oxidoreductase_OS=Achromobacter_pestifer_OX=1353889_GN=FOC84_22490_PE=4_SV=1…
3	n44570	1	0	39	1	15	0	0	3.78127e-08	0.00047463	0.706187	6.25023	GAAATGACGCTGCCTGCACTGCCTGCCTGTACTCCCTCCTTTTTTCCCGGGTCAGCGCGAC	61	tr|A0A7D4E0N5|A0A7D4E0N5_9BURK_LysR_family_transcriptional_regulator_OS=Achromobacter_pestifer_OX=1353889_GN=FOC84_01005_PE=3_SV=1
3	n44605	1	0	39	1	15	0	0	3.78127e-08	0.00047463	0.706187	6.25023	CCCATGATGCCCCTGTCGATGTCCGGCGCCGGGTTCTGTGACCTGGGCGCCTAGGCATGGCTTGATCAAATGATAATGATTCTTATTGTATCAAGATTATCAAACGCTGCTGCCGGGGAGCGACGCGGCGAGGAATAGGCGGGGCAATTCTGAAAAGGTTGAAAGCACGACCGTGCAGGGCGCCGCCGGCAGAATGACCGCCTTGCCATGGGAAACGTACTCGATGGAGGCGGATGATATGAAGCAGCGAGATCTCTACGCGGAGCTTGCCGAGGGTTTCGACGCGCTGTTCACGGCGCGCACCGCATCAGGGCGCGTGCAAGCTCCTGAGCTTCCTCAGCTCCGGAAACCACCGCATCCACAACCCCGCCACGGCGATGGTGCCGACCCCGCCGATCA…	509	tr|A0A6S7CSJ7|A0A6S7CSJ7_9BURK_Aspartate/alanine_antiporter_OS=Achromobacter_pulmonis_OX=1389932_GN=aspT_1_PE=3_SV=1~~~tr|A0A6S7F9K4|A0A6S7F9K4_9BURK_Enterobactin_exporter_EntS_OS=Achromobacter_insolitus_OX=217204_GN=entS_2_PE=4_SV=1~~~tr|A0A0M7J5P9|A0A0M7J5P9_9BURK_Enterobactin_exporter_EntS_OS=Achromobacter_aegrifaciens_OX=1287736_GN=entS_PE=4_SV=1~~~tr|A0A7D4I7Z6|A0A7D4I7Z6_9BURK_MFS_transport…
3	n44631	1	0	39	1	15	0	0	3.78127e-08	0.00047463	0.706187	6.25023	CTCGACGGAAATGATCTCAAGGTTGACGGCGTATCGGTCGCCCTTGGGATTGTCCCAATGCGCC	64	tr|A0A0M7KBS6|A0A0M7KBS6_9BURK_Domain_of_uncharacterized_function_(DUF1852)_OS=Achromobacter_aegrifaciens_OX=1287736_GN=ERS370000_04151_PE=4_SV=1~~~tr|A0A658A7P9|A0A658A7P9_ALCXX_DUF1852_domain-containing_protein_OS=Alcaligenes_xylosoxydans_xylosoxydans_OX=85698_GN=DAI43_25425_PE=4_SV=1~~~tr|A0A095WLG8|A0A095WLG8_9BURK_Uncharacterized_protein_OS=Achromobacter_sp._RTa_OX=1532557_GN=JL37_25810_PE=4…
3	n44637	1	0	39	1	15	0	0	3.78127e-08	0.00047463	0.706187	6.25023	GGCAGTGCTCAAGCCCACGCTATCGACAGAAATGATCTGCGCCGCAAGGCGGCGGTAGCCC	61	tr|A0A2I8DGZ3|A0A2I8DGZ3_9BURK_Microcystinase_C_OS=Achromobacter_sp._AONIH1_OX=1758194_GN=C2U31_12005_PE=3_SV=1~~~tr|A0A0M7CBS0|A0A0M7CBS0_9BURK_Microcystinase_C_OS=Achromobacter_aegrifaciens_OX=1287736_GN=ERS370000_00229_PE=3_SV=1~~~tr|E3HPJ5|E3HPJ5_ACHXA_Microcystinase_C_OS=Achromobacter_xylosoxidans_(strain_A8)_OX=762376_GN=AXYL_01342_PE=3_SV=1~~~tr|A0A7D4DYK0|A0A7D4DYK0_9BURK_Microcystinase_C…
3	n45163	1	0	39	1	15	0	0	3.78127e-08	0.00047463	0.706187	6.25023	TACCGCCTACCGGCCGCGGCTGGAAATGCAGGCGGCGCGCACGCGCCCCGGCGTGCCGCCC	61	tr|A0A0M7K034|A0A0M7K034_9BURK_Bacterial_capsule_synthesis_protein_PGA_cap_OS=Achromobacter_aegrifaciens_OX=1287736_GN=ERS370000_04005_PE=3_SV=1~~~tr|A0A658AFW0|A0A658AFW0_ALCXX_PGA_cap_domain-containing_protein_OS=Alcaligenes_xylosoxydans_xylosoxydans_OX=85698_GN=DAI43_15625_PE=3_SV=1~~~tr|E3HME5|E3HME5_ACHXA_Bacterial_capsule_synthesis_protein_PGA_cap_family_protein_OS=Achromobacter_xylosoxidan…
3	n45244	1	0	39	1	15	0	0	3.78127e-08	0.00047463	0.706187	6.25023	GAAATGCCAGTGCGACAGCGTATTGCTGGCGAGCAGGACCGCCCGCCGCCCGCTCTTGCGT	61	tr|A0A0M9IUI1|A0A0M9IUI1_9BURK_2-aminophenol_1,6-dioxygenase_beta_subunit_OS=Achromobacter_aegrifaciens_OX=1287736_GN=amnB_PE=4_SV=1~~~tr|A0A6S7F237|A0A6S7F237_9BURK_2-aminophenol_1,6-dioxygenase_subunit_beta_OS=Achromobacter_anxifer_OX=1287737_GN=cnbCb_PE=4_SV=1~~~tr|A0A424W4M4|A0A424W4M4_ALCXX_tRNA_U-34_5-methylaminomethyl-2-thiouridine_biosynthesis_protein_OS=Alcaligenes_xylosoxydans_xylosoxyd…
3	n45336	1	0	39	1	15	0	0	3.78127e-08	0.00047463	0.706187	6.25023	CGCAGAAATGCCCGCCCGAACCCGTCAGGATGACCGCCTTGATGCCGTCATCCTCGCGCAGTTCCGGGAGGGCGCGCGCGAACG	84	tr|A0A5N7ZWI8|A0A5N7ZWI8_9BURK_2-(1,2-epoxy-1,2-dihydrophenyl)acetyl-CoA_isomerase_OS=Achromobacter_sp._OX=134375_GN=E2603_26415_PE=3_SV=1~~~tr|A0A811H1U9|A0A811H1U9_9BURK_Short-chain-enoyl-CoA_hydratase_OS=Achromobacter_mucicolens_OX=1389922_GN=crt_9_PE=4_SV=1~~~tr|A0A8B5UY49|A0A8B5UY49_9BURK_Enoyl-CoA_hydratase/carnithine_racemase_OS=Achromobacter_sp._SLBN-14_OX=2768442_GN=FBY20_3864_PE=4_SV=1~…
3	n45338	1	0	39	1	15	0	0	3.78127e-08	0.00047463	0.706187	6.25023	TGGACGCACCGCCAGCCAGGCCCATTCCCGGACGCCGAAATGCCCGTCATCGGCCAGAGGCCGGATCAGCGCCAGCCGCTGCTGCAAGCTCAGGTCCGGCATTGC	105	tr|A0A6S7F230|A0A6S7F230_9BURK_DUF2169_domain-containing_protein_OS=Achromobacter_insolitus_OX=217204_GN=LMG6000_02729_PE=4_SV=1~~~tr|Q5D1B4|Q5D1B4_XENNE_Membrane_fusion_protein_(MFP)_family_protein_OS=Xenorhabdus_nematophila_OX=628_GN=prtC_PE=3_SV=1~~~tr|A0A246Q6J4|A0A246Q6J4_9BURK_Histidine_kinase_OS=Achromobacter_sp._HZ28_OX=2015171_GN=CEY04_13860_PE=4_SV=1~~~tr|A0A6S7F1B8|A0A6S7F1B8_9BURK_Unc…
3	n45379	1	0	39	1	15	0	0	3.78127e-08	0.00047463	0.706187	6.25023	GCCCGAGACCAGTTCGGCGCGGTTCTTGGCCGCGTCGCCGGTGAACAGAATGGGTTGGCGCGGATCGTCGACATAGAACAGCAAATGCCCGGGCGTATGGCCTGGCGCGGCGATGGCTGTGATGCCGGGCAGGAAGGCGTCGCCGTCG	148	tr|D4XEK2|D4XEK2_9BURK_Type_I_secretion_target_GGXGXDXXX_repeat_(2_copies)_(Fragment)_OS=Achromobacter_piechaudii_ATCC_43553_OX=742159_GN=HMPREF0004_3899_PE=4_SV=1~~~tr|A0A0X8BWJ1|A0A0X8BWJ1_9PSED_Histidine_kinase_OS=Pseudomonas_monteilii_OX=76759_GN=APT63_10965_PE=4_SV=1~~~tr|A0A0Q8BHY0|A0A0Q8BHY0_9BURK_MBL_fold_metallo-hydrolase_OS=Achromobacter_sp._Root565_OX=1736564_GN=ASD71_04940_PE=4_SV=1~~…
3	n45442	1	0	39	1	15	0	0	3.78127e-08	0.00047463	0.706187	6.25023	GGAAAACTCAAATGCCGAGCAGGGCGTTCAACCTGTCCTGCGATTGCTGGACTTCGGCGCG	61	tr|A0A246Q1E1|A0A246Q1E1_9BURK_ABC_transporter_ATP-binding_protein_OS=Achromobacter_sp._HZ28_OX=2015171_GN=CEY04_25955_PE=4_SV=1~~~tr|A0A6S7E281|A0A6S7E281_9BURK_Histidine_kinase_OS=Achromobacter_pulmonis_OX=1389932_GN=rcsC_12_PE=4_SV=1~~~tr|A0A2S8V650|A0A2S8V650_9BURK_Glutamate_mutase_OS=Achromobacter_sp._MYb9_OX=1827284_GN=CQ050_23260_PE=4_SV=1~~~tr|A0A0X8NZM1|A0A0X8NZM1_ALCXX_ABC_transporter_A…
3	n45536	1	0	39	1	15	0	0	3.78127e-08	0.00047463	0.706187	6.25023	CCCTGTACGACGGATGCTCCTCCTCCAAATGCCGGTGCTAAAGATGAACACGCCACGGGAGAACGCGTCTGCAGGCAATTCAAATCCCGA	90	tr|A0A0X8BTA7|A0A0X8BTA7_9PSED_Sorbosone_dehydrogenase_OS=Pseudomonas_monteilii_OX=76759_GN=APT63_05700_PE=4_SV=1~~~tr|A0A6S7DJ26|A0A6S7DJ26_9BURK_Uncharacterized_protein_OS=Achromobacter_dolens_OX=1287738_GN=LMG26841_03856_PE=4_SV=1~~~tr|A0A109Q430|A0A109Q430_9PSED_Allantoin_permease_OS=Pseudomonas_monteilii_OX=76759_GN=APT63_10710_PE=3_SV=1
3	n45593	1	0	39	1	15	0	0	3.78127e-08	0.00047463	0.706187	6.25023	ATCTGGATCGGCGCCAAGGAAGAGTCGGTGAGTGTGCTGGAGCAGGCGCGCATACCCGTGTTCCGCGATATCCCGCCCGCGGTTGCAGCCCTGGGCGCTGCTGTGCGTCTGAACGGCTTGCGCCATGCGGCGCTTACGGCGCCGGCGTTGCCGGCACCCCGGTGCGATGCGATGCCGGCCGCTAGTATCGCGTTTCTGCTTGAGTGGGACAGCAAGGCGCTATTGCGCGAACTCGGAACCGCCGGCATCCCCGACGGCGTGCTGGTGGACGGCGATATGCCCGACCGCTTGCCCGCGCCCTTGGCTTACCCCGTCGTCGCCAAGCTGCAGGCCAGTACTGTCCTGCACAAGAGCGACATAGGCGGCGTGGTGCTCGGCATCATGGACGACGAGCAATTG…	1180	tr|A0A7Y4KC64|A0A7Y4KC64_9BURK_Acetate--CoA_ligase_family_protein_OS=Achromobacter_deleyi_OX=1353891_GN=HLG70_27085_PE=4_SV=1~~~tr|A0A6S7F6Z1|A0A6S7F6Z1_9BURK_Trans-feruloyl-CoA_synthase_FCS1_OS=Achromobacter_insolitus_OX=217204_GN=FCS1_2_PE=4_SV=1~~~tr|A0A6N0JVC2|A0A6N0JVC2_ACHDE_Acetate--CoA_ligase_family_protein_OS=Achromobacter_denitrificans_OX=32002_GN=FOC81_01970_PE=4_SV=1~~~tr|A0A095UN02|A…
3	n45595	1	0	39	1	15	0	0	3.78127e-08	0.00047463	0.706187	6.25023	CGACAGCACGTCGAAATGCTCGCTGGCGAACGCCACCATCTCGTCCTTGAGCGC	54	tr|A0A6S6ZZL5|A0A6S6ZZL5_9BURK_Methylglyoxal_synthase_OS=Achromobacter_deleyi_OX=1353891_GN=mgsA_PE=4_SV=1~~~tr|A0A2S5GLS1|A0A2S5GLS1_9BURK_Methylglyoxal_synthase_OS=Achromobacter_spanius_OX=217203_GN=C4E15_22890_PE=3_SV=1~~~tr|A0A6S7APT8|A0A6S7APT8_9BURK_Methylglyoxal_synthase_OS=Achromobacter_kerstersii_OX=1353890_GN=mgsA_PE=3_SV=1~~~tr|A0A7X9VWV3|A0A7X9VWV3_9BURK_Methylglyoxal_synthase_OS=Achr…
3	n45664	1	0	39	1	15	0	0	3.78127e-08	0.00047463	0.706187	6.25023	TTCCTGGAACGCGAAATGCTGATGGAGCAGCTGCACGCGGCCAACGTCCAGCTCATGTCAT	61	tr|A0A854PQ87|A0A854PQ87_9BURK_Diguanylate_cyclase_OS=Achromobacter_sp._KAs_3-5_OX=1915388_GN=BMR85_029080_PE=4_SV=1~~~tr|A0A8B5V547|A0A8B5V547_9BURK_Diguanylate_cyclase_OS=Achromobacter_sp._SLBN-14_OX=2768442_GN=FBY20_5297_PE=4_SV=1~~~tr|H0F8K2|H0F8K2_9BURK_Diguanylate_cyclase_YeaP_OS=Achromobacter_arsenitoxydans_SY8_OX=477184_GN=KYC_15502_PE=4_SV=1~~~tr|A0A176XT30|A0A176XT30_ALCXX_Diguanylate_c…
3	n45832	1	0	39	1	15	0	0	3.78127e-08	0.00047463	0.706187	6.25023	GGGCGGCGAACGCCAAATGCTGGCCGTCGGCCGTGCATTGATGGCCAAGCCCAACCTGCTG	61	tr|A0A6S7F7L8|A0A6S7F7L8_9BURK_High-affinity_branched-chain_amino_acid_transport_ATP-binding_protein_LivF_OS=Achromobacter_insolitus_OX=217204_GN=livF_10_PE=4_SV=1~~~tr|A0A7D4I1K8|A0A7D4I1K8_9BURK_ABC_transporter_ATP-binding_protein_OS=Achromobacter_pestifer_OX=1353889_GN=FOC84_20780_PE=4_SV=1~~~tr|E3HQ44|E3HQ44_ACHXA_ABC_transporter_family_protein_80_OS=Achromobacter_xylosoxidans_(strain_A8)_OX=…
3	n45956	1	0	39	1	15	0	0	3.78127e-08	0.00047463	0.706187	6.25023	GCTGCTGGCGGAAATGCGCCACGCGCTGGGACTGGACCGTCCTGTAGGCGAGCAGTTCCTG	61	tr|A0A8B5UWG4|A0A8B5UWG4_9BURK_Peptide/nickel_transport_system_permease_protein_OS=Achromobacter_sp._SLBN-14_OX=2768442_GN=FBY20_1118_PE=4_SV=1~~~tr|A0A854PYY4|A0A854PYY4_9BURK_ABC_transporter_permease_OS=Achromobacter_sp._KAs_3-5_OX=1915388_GN=BMR85_004475_PE=4_SV=1~~~tr|A0A6S7DCF9|A0A6S7DCF9_9BURK_Glutathione_transport_system_permease_protein_GsiC_OS=Achromobacter_mucicolens_OX=1389922_GN=gsiC_…
3	n46024	1	0	39	1	15	0	0	3.78127e-08	0.00047463	0.706187	6.25023	CAGCGCCGAAATGCGCTCGGCCATCTGGTTGAAGCTTTCG	40	tr|A0A7X9W6H6|A0A7X9W6H6_9BURK_Histidine_kinase_OS=Achromobacter_sp._Bel_OX=2727415_GN=HG262_26785_PE=4_SV=1~~~tr|J4QYP4|J4QYP4_9BURK_Histidine_kinase_OS=Achromobacter_marplatensis_OX=470868_GN=QWC_00850_PE=4_SV=1~~~tr|A0A2S8V853|A0A2S8V853_9BURK_Histidine_kinase_OS=Achromobacter_sp._MYb9_OX=1827284_GN=CQ050_20355_PE=4_SV=1~~~tr|A0A366GD69|A0A366GD69_9BURK_Histidine_kinase_OS=Achromobacter_marpla…
3	n46103	1	0	39	1	15	0	0	3.78127e-08	0.00047463	0.706187	6.25023	AGTTCGCAGACCAGATCCAGAAGTTCGACCCCGCGCATACCGAAGAAATGCGCGGCATCGCGCAAGGCGCGGGCTGCGCCTTC	83	tr|E3HQV9|E3HQV9_ACHXA_Acyl-coenzyme_A:6-aminopenicillanic_acid_acyl-transferase_family_protein_1_OS=Achromobacter_xylosoxidans_(strain_A8)_OX=762376_GN=AXYL_01429_PE=4_SV=1~~~tr|A0A424WIG8|A0A424WIG8_ALCXX_Acyl-CoA--6-aminopenicillanic_acid_acyltransferase_OS=Alcaligenes_xylosoxydans_xylosoxydans_OX=85698_GN=DY367_05600_PE=4_SV=1~~~tr|A0A7X9W0V1|A0A7X9W0V1_9BURK_Acyl-CoA--6-aminopenicillanic_aci…
3	n46388	1	0	39	1	15	0	0	3.78127e-08	0.00047463	0.706187	6.25023	ACCGCTTGCGCGGCCACAAATGTAAGTAAAAATTGAATGCGGCGTAGAGCCGCCGGCCGGC	61
3	n46505	1	0	39	1	15	0	0	3.78127e-08	0.00047463	0.706187	6.25023	CCGTCTGCGAAATGTCGGCCGGCAGTTGCCTGTCGTAAAAGGCGTGGATCAGCTCGTCGTCGACCAGG	68	tr|A0A6S7AMU7|A0A6S7AMU7_9BURK_Uncharacterized_protein_OS=Achromobacter_deleyi_OX=1353891_GN=LMG3458_05251_PE=4_SV=1~~~tr|A0A446CYZ6|A0A446CYZ6_9BURK_Uncharacterized_protein_OS=Achromobacter_veterisilvae_OX=2069367_GN=AVE30378_05494_PE=4_SV=1~~~tr|A0A095X3R7|A0A095X3R7_9BURK_ATP-dependent_helicase_OS=Achromobacter_sp._RTa_OX=1532557_GN=JL37_11630_PE=4_SV=1~~~tr|D4XAC5|D4XAC5_9BURK_ATP-dependent_h…
3	n46547	1	0	39	1	15	0	0	3.78127e-08	0.00047463	0.706187	6.25023	CATAACGAAATGTTCAGCGCCTGTCGCGAGATTCCTGCACGGCCAATAGATCTCCCGACGA	61	tr|A0A2S0IDP2|A0A2S0IDP2_9BURK_Hydrolase_Nlp/P60_OS=Achromobacter_spanius_OX=217203_GN=CLM73_25330_PE=3_SV=1~~~tr|A0A848N9R2|A0A848N9R2_9BURK_Phage_tail_protein_OS=Achromobacter_ruhlandii_OX=72557_GN=HGQ98_05210_PE=4_SV=1~~~tr|A0A0D6I3A2|A0A0D6I3A2_ALCXX_C40_family_peptidase_OS=Alcaligenes_xylosoxydans_xylosoxydans_OX=85698_GN=ERS451415_03801_PE=3_SV=1~~~tr|A0A7U0E4M9|A0A7U0E4M9_ALCXX_C40_family_…
3	n46723	1	0	39	1	15	0	0	3.78127e-08	0.00047463	0.706187	6.25023	GGGAAATGGAAAGCACCGGCAGCCTGATCCACGGCGCCGGCATACGCGTCGGCAATTGAGT	61	tr|A0A6N0JKM7|A0A6N0JKM7_ACHDE_Tripartite_tricarboxylate_transporter_substrate_binding_protein_OS=Achromobacter_denitrificans_OX=32002_GN=FOC81_13500_PE=3_SV=1~~~tr|A0A6S7F368|A0A6S7F368_9BURK_Uncharacterized_protein_OS=Achromobacter_insolitus_OX=217204_GN=LMG6000_00382_PE=3_SV=1~~~tr|E3HEM3|E3HEM3_ACHXA_Tat_pathway_signal_sequence_domain_protein_15_OS=Achromobacter_xylosoxidans_(strain_A8)_OX=76…
3	n46771	1	0	39	1	15	0	0	3.78127e-08	0.00047463	0.706187	6.25023	AACGCCACCGTCTGGATCGGCGCGCGGGAAATGGAATGGGCCGCCGCGCAGCCGCCCGGTTTCAACCCGCTGCCCGAACTGTACGTGCGC	90	tr|A0A6S7A905|A0A6S7A905_9BURK_HTH_tetR-type_domain-containing_protein_OS=Achromobacter_deleyi_OX=1353891_GN=LMG3458_03745_PE=4_SV=1~~~tr|A0A4Q1HK85|A0A4Q1HK85_9BURK_Long-chain_fatty_acid--CoA_ligase_OS=Achromobacter_aloeverae_OX=1750518_GN=C7R54_15845_PE=4_SV=1~~~tr|A0A446CEG8|A0A446CEG8_9BURK_N-acyl_homoserine_lactonase_OS=Achromobacter_veterisilvae_OX=2069367_GN=aiiA_1_PE=4_SV=1~~~tr|A0A0X8NUR…
3	n46788	1	0	39	1	15	0	0	3.78127e-08	0.00047463	0.706187	6.25023	TACGACGCGCTCAGCGCCTGAAATGGAAGCACCGGCGCCGGCAAGGCGCCGGTTCGCGCTT	61
3	n46942	1	0	39	1	15	0	0	3.78127e-08	0.00047463	0.706187	6.25023	GAATCCCGAAATGGAGCAAGGCATGGCGACACTGGGCAAG	40	tr|A0A446C9G2|A0A446C9G2_9BURK_2-aminoadipate_transaminase_OS=Achromobacter_agilis_OX=1353888_GN=lysN_5_PE=3_SV=1~~~tr|A0A095UN43|A0A095UN43_9BURK_GntR_family_transcriptional_regulator_OS=Achromobacter_sp._RTa_OX=1532557_GN=JL37_20575_PE=3_SV=1~~~tr|A0A7T4B7C3|A0A7T4B7C3_9BURK_PLP-dependent_aminotransferase_family_protein_OS=Achromobacter_deleyi_OX=1353891_GN=I6I07_10730_PE=4_SV=1~~~tr|A0A0X8P2B2…
3	n47148	1	0	39	1	15	0	0	3.78127e-08	0.00047463	0.706187	6.25023	GTCCACTGGGCAGGACCAGAGGCAGATGCGAAATGGCCTCGATGCGCGTGGTCTCGCCGGC	61	tr|A0A6S6Z6G3|A0A6S6Z6G3_9BURK_HTH_lysR-type_domain-containing_protein_OS=Achromobacter_deleyi_OX=1353891_GN=LMG3458_00526_PE=3_SV=1~~~tr|A0A3S9Z1Q0|A0A3S9Z1Q0_9BURK_LysR_family_transcriptional_regulator_OS=Achromobacter_spanius_OX=217203_GN=ELS24_26550_PE=3_SV=1~~~tr|A0A6S7DCE7|A0A6S7DCE7_9BURK_HTH_lysR-type_domain-containing_protein_OS=Achromobacter_pulmonis_OX=1389932_GN=LMG26788_01306_PE=3_SV…
3	n47215	1	0	39	1	15	0	0	3.78127e-08	0.00047463	0.706187	6.25023	CCAGGAAATGGCCGAGCGCATCCGCGACGTGACCCTCAAACTGTATG	47	tr|A0A246Q3P0|A0A246Q3P0_9BURK_Phosphoribosylaminoimidazole-succinocarboxamide_synthase_OS=Achromobacter_sp._HZ28_OX=2015171_GN=purC_PE=3_SV=1~~~tr|A0A4Q1HC55|A0A4Q1HC55_9BURK_Phosphoribosylaminoimidazole-succinocarboxamide_synthase_OS=Achromobacter_aloeverae_OX=1750518_GN=purC_PE=3_SV=1~~~tr|A0A6S7E7E1|A0A6S7E7E1_9BURK_Phosphoribosylaminoimidazole-succinocarboxamide_synthase_OS=Achromobacter_pul…
3	n47343	1	0	39	1	15	0	0	3.78127e-08	0.00047463	0.706187	6.25023	TGGGGAAATGGCTGTACCTGCCCCAGACCGACGAGGACTTCGAG	44	tr|A0A6S7FJA3|A0A6S7FJA3_9BURK_Uncharacterized_protein_OS=Achromobacter_insolitus_OX=217204_GN=LMG6000_04850_PE=4_SV=1~~~tr|A0A6S7DN42|A0A6S7DN42_9BURK_Uncharacterized_protein_OS=Achromobacter_anxifer_OX=1287737_GN=LMG26858_01065_PE=4_SV=1~~~tr|A0A0M7JV09|A0A0M7JV09_9BURK_Uncharacterized_protein_OS=Achromobacter_aegrifaciens_OX=1287736_GN=ERS370000_03909_PE=4_SV=1~~~tr|A0A658AFY1|A0A658AFY1_ALCXX…
3	n47505	1	0	39	1	15	0	0	3.78127e-08	0.00047463	0.706187	6.25023	CAGGCGAAAAAGGCGGCCTGAAAATGGCGGCCAGCCTGAAGAAATACCGCGAGAAGCGCAA	61	tr|A0A0Q8XEF2|A0A0Q8XEF2_9BURK_3\'-phosphoesterase_OS=Achromobacter_sp._Root83_OX=1736602_GN=ligD_PE=4_SV=1~~~tr|A0A7Y4K4J7|A0A7Y4K4J7_9BURK_3\'-phosphoesterase_OS=Achromobacter_deleyi_OX=1353891_GN=ligD_PE=4_SV=1~~~tr|A0A0Q8BIE7|A0A0Q8BIE7_9BURK_3\'-phosphoesterase_OS=Achromobacter_sp._Root565_OX=1736564_GN=ligD_PE=4_SV=1~~~tr|A0A0M7IMM7|A0A0M7IMM7_9BURK_3\'-phosphoesterase_OS=Achromobacter_aegr…
3	n47533	1	0	39	1	15	0	0	3.78127e-08	0.00047463	0.706187	6.25023	GCTGTTGAGCATCCTGGGGGTCGAAATGGTATTGCGCCAGCAAGGGGCGCAGCCGGGACCCGAAACAAC	69	tr|A0A2D0AVL2|A0A2D0AVL2_9BURK_Transcriptional_regulator_OS=Achromobacter_sp._HZ28_OX=2015171_GN=CEY04_23945_PE=4_SV=1~~~tr|A0A6S6Z4S1|A0A6S6Z4S1_9BURK_HTH_cro/C1-type_domain-containing_protein_OS=Achromobacter_pestifer_OX=1353889_GN=LMG3431_03401_PE=4_SV=1~~~tr|A0A2S8V6V8|A0A2S8V6V8_9BURK_Transcriptional_regulator_OS=Achromobacter_sp._MYb9_OX=1827284_GN=CQ050_22355_PE=4_SV=1~~~tr|A0A0Q8WSE4|A0A0…
3	n47613	1	0	39	1	15	0	0	3.78127e-08	0.00047463	0.706187	6.25023	AGCCATTGCTGAACTGCAAGGCCGCATCGCGGCCGAACAGGCAATGATTCAGAACGAACAGACCAAGCTACAGATGTACCAAATGGTCGCGGCAGCCGAAGACCGCCTACAG	112	tr|A0A2N8KJL0|A0A2N8KJL0_9BURK_P-type_DNA_transfer_protein_VirB5_OS=Achromobacter_pulmonis_OX=1389932_GN=virB5_PE=4_SV=1~~~tr|A0A7Y4K543|A0A7Y4K543_9BURK_P-type_DNA_transfer_protein_VirB5_OS=Achromobacter_deleyi_OX=1353891_GN=virB5_PE=4_SV=1~~~tr|A0A095UP27|A0A095UP27_9BURK_Type_IV_secretion_protein_VirB5_OS=Achromobacter_sp._RTa_OX=1532557_GN=JL37_21405_PE=4_SV=1~~~tr|A0A4Q1HLC2|A0A4Q1HLC2_9BURK…
3	n47666	1	0	39	1	15	0	0	3.78127e-08	0.00047463	0.706187	6.25023	GGATAAATGGTTTTGCGCGAAATTAAGGGGCGCGCGACGTCAGAACGGCACGTCGCCTTCG	61
3	n47760	1	0	39	1	15	0	0	3.78127e-08	0.00047463	0.706187	6.25023	GGAAATGGTGCTGGCCAAGTCCGACCTGGCGATCGCCGCGCGCTACGCGCAGCTGGTG	58	tr|A0A446CWY8|A0A446CWY8_9BURK_Phosphoenolpyruvate_carboxylase_OS=Achromobacter_agilis_OX=1353888_GN=ppc_PE=3_SV=1~~~tr|A0A6N0JUV2|A0A6N0JUV2_ACHDE_Phosphoenolpyruvate_carboxylase_OS=Achromobacter_denitrificans_OX=32002_GN=ppc_PE=3_SV=1~~~tr|A0A6S7F691|A0A6S7F691_9BURK_Phosphoenolpyruvate_carboxylase_OS=Achromobacter_insolitus_OX=217204_GN=ppc_PE=3_SV=1~~~tr|A0A6S7D7H7|A0A6S7D7H7_9BURK_Phosphoeno…
3	n47813	1	0	39	1	15	0	0	3.78127e-08	0.00047463	0.706187	6.25023	GCAAATGGTGGCGATTCCGTGCCTGCTGTACAAC	34	tr|A0A7X9W0J8|A0A7X9W0J8_9BURK_CDP-diacylglycerol--glycerol-3-phosphate_3-phosphatidyltransferase_OS=Achromobacter_sp._Bel_OX=2727415_GN=pgsA_PE=3_SV=1~~~tr|A0A446CLI5|A0A446CLI5_9BURK_CDP-diacylglycerol--glycerol-3-phosphate_3-phosphatidyltransferase_OS=Achromobacter_agilis_OX=1353888_GN=pgsA_PE=3_SV=1~~~tr|A0A7D4E177|A0A7D4E177_9BURK_CDP-diacylglycerol--glycerol-3-phosphate_3-phosphatidyltransf…
3	n47955	1	0	39	1	15	0	0	3.78127e-08	0.00047463	0.706187	6.25023	GGCGACCCCGAAATGGGCCTCGTACAGCGCCGGGATATTGGGCGCCATCACGGCCACCGTA	61	tr|A0A6S7F757|A0A6S7F757_9BURK_Long-chain-fatty-acid--CoA_ligase_OS=Achromobacter_insolitus_OX=217204_GN=LMG6000_01634_PE=4_SV=1~~~tr|A0A446CA20|A0A446CA20_9BURK_Long-chain-fatty-acid--CoA_ligase_OS=Achromobacter_veterisilvae_OX=2069367_GN=lcfB_5_PE=4_SV=1~~~tr|A0A4Q1HKS2|A0A4Q1HKS2_9BURK_Acyl-CoA_synthetase_OS=Achromobacter_aloeverae_OX=1750518_GN=C7R54_07445_PE=4_SV=1~~~tr|A0A6S7CMZ4|A0A6S7CMZ4…
3	n48037	1	0	39	1	15	0	0	3.78127e-08	0.00047463	0.706187	6.25023	GAGCGCCACGATGGTGGAGCTGCAGCGCGCTTCCGGCCAGTCCATGGACGAGATCTCCAAGGATTTTGCGCGGATGCCGGACGGCGTGACGAAATGGGCGGAAGAGCACAACCGCTCCATGAACTTCATGAATCTGGCGCAATGGGAC	148	tr|A0A6S6YTU2|A0A6S6YTU2_9BURK_Uncharacterized_protein_OS=Achromobacter_pestifer_OX=1353889_GN=LMG3431_01763_PE=3_SV=1~~~tr|A0A2N8KDL4|A0A2N8KDL4_9BURK_Phage_tail_tape_measure_protein_OS=Achromobacter_pulmonis_OX=1389932_GN=C1I89_22185_PE=4_SV=1~~~tr|A0A3S4RUV8|A0A3S4RUV8_9BURK_Phage-related_minor_tail_protein_OS=Achromobacter_spanius_OX=217203_GN=NCTC13519_04478_PE=4_SV=1~~~tr|A0A095V2M9|A0A095V…
3	n48054	1	0	39	1	15	0	0	3.78127e-08	0.00047463	0.706187	6.25023	AGTCGAAATGGGTCTGCGACGGCGGCATGGCCAGCTGCGCGTCCAGCCAGGCCGCGTAGCC	61	tr|A0A7X9ZF60|A0A7X9ZF60_9BURK_DUF1800_domain-containing_protein_OS=Achromobacter_sp._Bel_OX=2727415_GN=HG262_26955_PE=4_SV=1~~~tr|A0A8B5UXL0|A0A8B5UXL0_9BURK_Uncharacterized_protein_(DUF1800_family)_OS=Achromobacter_sp._SLBN-14_OX=2768442_GN=FBY20_3540_PE=4_SV=1~~~tr|A0A3C1XUL9|A0A3C1XUL9_9BURK_DUF1800_domain-containing_protein_(Fragment)_OS=Achromobacter_sp._OX=134375_GN=DCR74_04095_PE=4_SV=1~~…
3	n48090	1	0	39	1	15	0	0	3.78127e-08	0.00047463	0.706187	6.25023	GAAATGGGGCAAGCTCGATGCCTTGGTCAATAATGCCGGCGTGGCCGGCCCGACCAACCGGCTGGAG	67	tr|A0A0X8P1X7|A0A0X8P1X7_ALCXX_3-oxoacyl-ACP_reductase_FabG_OS=Alcaligenes_xylosoxydans_xylosoxydans_OX=85698_GN=AL504_21725_PE=4_SV=1~~~tr|F7SY23|F7SY23_9BURK_Short_chain_dehydrogenase_family_protein_60_OS=Achromobacter_insuavis_AXX-A_OX=1003200_GN=AXXA_07869_PE=4_SV=1~~~tr|A0A1R1K002|A0A1R1K002_ALCXX_Short-chain_dehydrogenase_OS=Alcaligenes_xylosoxydans_xylosoxydans_OX=85698_GN=BIZ92_00060_PE=4…
3	n48135	1	0	39	1	15	0	0	3.78127e-08	0.00047463	0.706187	6.25023	ATCCTGTCTGGGGAAAGCGAAGGAAATGGGGTTGGTGCCGAAATACGGTTGCCGGCCGCCG	61	tr|A0A4Q1HFN5|A0A4Q1HFN5_9BURK_Lactate_dehydrogenase_OS=Achromobacter_aloeverae_OX=1750518_GN=C7R54_19280_PE=3_SV=1~~~tr|A0A246QDJ9|A0A246QDJ9_9BURK_FAD-binding_oxidoreductase_OS=Achromobacter_sp._HZ28_OX=2015171_GN=CEY04_02050_PE=4_SV=1~~~tr|A0A7D4I340|A0A7D4I340_9BURK_Ldh_family_oxidoreductase_OS=Achromobacter_pestifer_OX=1353889_GN=FOC84_26105_PE=3_SV=1~~~tr|A0A424W4A2|A0A424W4A2_ALCXX_Ldh_fam…
3	n48294	1	0	39	1	15	0	0	3.78127e-08	0.00047463	0.706187	6.25023	GGGCAGCCTCGGCGGCTAAAGAACCCTGGCGTCGGCAAGCTCGCAGCCCTGCCGCGCCCGCCCCCAAGATCCCGGCCGCGCCCTACTCGGA	91
3	n48308	1	0	39	1	15	0	0	3.78127e-08	0.00047463	0.706187	6.25023	CAGGTTTCGGCACAAAGAACCGATCCTTCAATTCCTGCAACCCAATCCTATCCAGCATTTCCGTCAACCGATCAGCCGCCTTCCTGCGCGGCAAATCCTTG	101	tr|A0A1N7P253|A0A1N7P253_9BURK_Predicted_P-loop_ATPase,_KAP-like_OS=Achromobacter_sp._MFA1_R4_OX=1881016_GN=SAMN05428937_0384_PE=4_SV=1~~~tr|A0A6S6Z2P1|A0A6S6Z2P1_9BURK_Vitamin_B12_import_ATP-binding_protein_BtuD_OS=Achromobacter_pestifer_OX=1353889_GN=btuD_3_PE=4_SV=1~~~tr|A0A446CEL9|A0A446CEL9_9BURK_Spermidine/putrescine_import_ATP-binding_protein_PotA_OS=Achromobacter_veterisilvae_OX=2069367_G…
3	n48391	1	0	39	1	15	0	0	3.78127e-08	0.00047463	0.706187	6.25023	CAGCACGGCCGGCATCACGTGCAATTCGCCAAAGAACGCCGGCGCCGTGATGCTGAGCGCG	61	tr|A0A0Q8WX89|A0A0Q8WX89_9BURK_LysR_family_transcriptional_regulator_OS=Achromobacter_sp._Root83_OX=1736602_GN=ASE30_14870_PE=3_SV=1~~~tr|A0A2I8DRX1|A0A2I8DRX1_9BURK_LysR_family_transcriptional_regulator_OS=Achromobacter_sp._AONIH1_OX=1758194_GN=C2U31_09925_PE=3_SV=1~~~tr|A0A246QA99|A0A246QA99_9BURK_LysR_family_transcriptional_regulator_OS=Achromobacter_sp._HZ28_OX=2015171_GN=CEY04_10710_PE=3_SV=…
3	n48428	1	0	39	1	15	0	0	3.78127e-08	0.00047463	0.706187	6.25023	GCGCGAAGCCGTGGAAAGAACGGCTGCGCACTGGGGTGCGATCCACGTCCTGGTGAACAAC	61	tr|A0A0X8P1X7|A0A0X8P1X7_ALCXX_3-oxoacyl-ACP_reductase_FabG_OS=Alcaligenes_xylosoxydans_xylosoxydans_OX=85698_GN=AL504_21725_PE=4_SV=1~~~tr|F7SY23|F7SY23_9BURK_Short_chain_dehydrogenase_family_protein_60_OS=Achromobacter_insuavis_AXX-A_OX=1003200_GN=AXXA_07869_PE=4_SV=1~~~tr|A0A1R1K002|A0A1R1K002_ALCXX_Short-chain_dehydrogenase_OS=Alcaligenes_xylosoxydans_xylosoxydans_OX=85698_GN=BIZ92_00060_PE=4…
3	n48458	1	0	39	1	15	0	0	3.78127e-08	0.00047463	0.706187	6.25023	AAAGAATCCTTCGACCCACTACGCCTACGGCTCCACGGGACCCGGTTCGTACATCCACGTGTTCGGCATGTGGTTCCAGGAACAG	85	tr|A0A095UCA7|A0A095UCA7_9BURK_LacI_family_transcriptional_regulator_OS=Achromobacter_sp._RTa_OX=1532557_GN=JL37_27835_PE=3_SV=1~~~tr|A0A446CIP2|A0A446CIP2_9BURK_Uncharacterized_protein_OS=Achromobacter_agilis_OX=1353888_GN=AGI3411_03259_PE=3_SV=1~~~tr|A0A427WJI1|A0A427WJI1_ACHDE_Tripartite_tricarboxylate_transporter_substrate_binding_protein_OS=Achromobacter_denitrificans_OX=32002_GN=FOC81_14000…
3	n48608	1	0	39	1	15	0	0	3.78127e-08	0.00047463	0.706187	6.25023	GCATACGGGAAAGAAGCTCTCGTTCAGCACTCGGCGCTTGTAGAGGCCGGGGGTGGGCTCG	61	tr|A0A0Q8WKG1|A0A0Q8WKG1_9BURK_LysR_family_transcriptional_regulator_OS=Achromobacter_sp._Root83_OX=1736602_GN=ASE30_16730_PE=3_SV=1~~~tr|A0A6S7F4S5|A0A6S7F4S5_9BURK_Glycine_cleavage_system_transcriptional_activator_OS=Achromobacter_insolitus_OX=217204_GN=gcvA_1_PE=3_SV=1~~~tr|A0A446C5E9|A0A446C5E9_9BURK_Glycine_cleavage_system_transcriptional_activator_OS=Achromobacter_agilis_OX=1353888_GN=gcvA_…
3	n48708	1	0	39	1	15	0	0	3.78127e-08	0.00047463	0.706187	6.25023	CGCGCTCGCGCAGGCAAAGAAGGGACCCACATGGATACGCTTCGCCTCCGACATGACCATC	61	tr|A0A2I8DJW9|A0A2I8DJW9_9BURK_Type_II_toxin-antitoxin_system_ParD_family_antitoxin_OS=Achromobacter_sp._AONIH1_OX=1758194_GN=C2U31_17800_PE=4_SV=1~~~tr|A0A246Q7Y2|A0A246Q7Y2_9BURK_ABC_transporter_permease_OS=Achromobacter_sp._HZ28_OX=2015171_GN=CEY04_16660_PE=4_SV=1~~~tr|A0A4Q1HSD1|A0A4Q1HSD1_9BURK_ABC_transporter_permease_OS=Achromobacter_aloeverae_OX=1750518_GN=C7R54_05930_PE=4_SV=1~~~tr|A0A6S…
3	n48720	1	0	39	1	15	0	0	3.78127e-08	0.00047463	0.706187	6.25023	CGTCCTTATAGTGCCTCTCAAAGAAGGGGGCCGAGACCAGGATGCACAGACCGCGCCCCCCCCGAGAGACACCAGGGAAAACCA	84	tr|A0A1R1JUY2|A0A1R1JUY2_ALCXX_Peptidase_OS=Alcaligenes_xylosoxydans_xylosoxydans_OX=85698_GN=BIZ92_25350_PE=4_SV=1~~~tr|A0A0M9IQT4|A0A0M9IQT4_ALCXX_Uncharacterized_iron-regulated_membrane_protein_OS=Alcaligenes_xylosoxydans_xylosoxydans_OX=85698_GN=ERS369984_01267_PE=4_SV=1~~~tr|A0A7U0I2A0|A0A7U0I2A0_ALCXX_PepSY_domain-containing_protein_OS=Alcaligenes_xylosoxydans_xylosoxydans_OX=85698_GN=I6I48…
3	n48791	1	0	39	1	15	0	0	3.78127e-08	0.00047463	0.706187	6.25023	GAAAGACATCACGATCAATCCGGGAGCCGGAGCTCCACCCGGCCGTCCGGCGCATCAGGCCACGGCGCAGGAGCGCAGCGGCCGCAAGGCAGTGATTGCCGCGTCGGCCGGCAATGCCCTCGAATGGTATGACTTCACCGTCTATGCCCTCTTCGCTGTCTACATCGGACAGAACTTTTTCCACAACTCCGATCCCACCGTGCAACTGATGGCCTCGTTCCTGGCCTTC	229	tr|A0A0X8NUL3|A0A0X8NUL3_ALCXX_MFS_transporter_OS=Alcaligenes_xylosoxydans_xylosoxydans_OX=85698_GN=AL504_00420_PE=4_SV=1~~~tr|F7T9X1|F7T9X1_9BURK_Major_facilitator_transporter_OS=Achromobacter_insuavis_AXX-A_OX=1003200_GN=AXXA_28845_PE=4_SV=1~~~tr|A0A7T4AZK8|A0A7T4AZK8_9BURK_MHS_family_MFS_transporter_OS=Achromobacter_deleyi_OX=1353891_GN=I6I07_20145_PE=4_SV=1~~~tr|A0A0M7EPQ5|A0A0M7EPQ5_9BURK_Pr…
3	n48813	1	0	39	1	15	0	0	3.78127e-08	0.00047463	0.706187	6.25023	CAAGAAAGACATGCTGGTGGCACAGTTGCGTGCAGATCTGGACTTTACGTTCTTCAGCGAC	61	tr|A0A6S7FKV2|A0A6S7FKV2_9BURK_Tyrosine_recombinase_XerC_OS=Achromobacter_insolitus_OX=217204_GN=xerC_10_PE=4_SV=1~~~tr|A0A424W7A4|A0A424W7A4_ALCXX_NMT1_domain-containing_protein_OS=Alcaligenes_xylosoxydans_xylosoxydans_OX=85698_GN=DY367_23880_PE=4_SV=1~~~tr|A0A0M7FUF6|A0A0M7FUF6_ALCXX_Putative_thiamine_biosynthesis_protein_HI_0357_OS=Alcaligenes_xylosoxydans_xylosoxydans_OX=85698_GN=ERS369984_02…
3	n48825	1	0	39	1	15	0	0	3.78127e-08	0.00047463	0.706187	6.25023	CCTGCCCTGCGCCGACTGCCCGGGCATCCGAACCCGCCTGACCTTGGAACAGGATGGCCGCTACGAAAGACAGACCCAGTACCTGGACCGCCAGCCGCAGCCCGAGGTGGTAACCGGCACATTCAGCTGGGAGTCCGACGGCAGCACCATC	151	tr|A0A6S7F9S1|A0A6S7F9S1_9BURK_Uncharacterized_protein_OS=Achromobacter_insolitus_OX=217204_GN=LMG6000_05561_PE=4_SV=1~~~tr|A0A5N7ZSJ8|A0A5N7ZSJ8_9BURK_MFS_transporter_OS=Achromobacter_sp._OX=134375_GN=E2603_23720_PE=4_SV=1~~~tr|A0A0M9ICZ1|A0A0M9ICZ1_9BURK_Copper_homeostasis_protein_CutF_OS=Achromobacter_aegrifaciens_OX=1287736_GN=nlpE_PE=4_SV=1~~~tr|E3HW81|E3HW81_ACHXA_Uncharacterized_lipoprotei…
3	n48868	1	0	39	1	15	0	0	3.78127e-08	0.00047463	0.706187	6.25023	AAAGACAGGCGTTGCCCAGGCTGGGCCGGGCAGGACGCCGGGATGGAGACGATTCATGAAG	61
3	n48977	1	0	39	1	15	0	0	3.78127e-08	0.00047463	0.706187	6.25023	CTTGATCCGCTTCCCTCGCCAGTCGATATCTACCTGGCCGGCGCCATCCTTGATGGCCTTCTCACCGAAGGGGCGACCGCGGACGGCAAAGACCCGGCGCGCCTTGTTGCGGCGCGCG	118	tr|A0A366GFR6|A0A366GFR6_9BURK_Hemolysin_activation/secretion_protein_OS=Achromobacter_marplatensis_OX=470868_GN=DFP87_1011239_PE=4_SV=1~~~tr|A0A2N8KQV3|A0A2N8KQV3_9BURK_Transporter_OS=Achromobacter_pulmonis_OX=1389932_GN=C1I89_05830_PE=4_SV=1~~~tr|A0A7T2RJ63|A0A7T2RJ63_ALCXX_Phage_terminase_large_subunit_family_protein_OS=Alcaligenes_xylosoxydans_xylosoxydans_OX=85698_GN=I6G72_17600_PE=4_SV=1~~~…
3	n49095	1	0	39	1	15	0	0	3.78127e-08	0.00047463	0.706187	6.25023	GGACGTTCGCATCGATATCGACGGCGAGGAAAGACCGGCGCTGGTTGCGCGCTGGCTCACG	61	tr|A0A3S9YY39|A0A3S9YY39_9BURK_ABC_transporter_permease_OS=Achromobacter_spanius_OX=217203_GN=ELS24_19265_PE=3_SV=1~~~tr|A0A6S6ZT69|A0A6S6ZT69_9BURK_Glutathione_transport_system_permease_protein_GsiD_OS=Achromobacter_kerstersii_OX=1353890_GN=gsiD_2_PE=3_SV=1~~~tr|A0A0M7HI51|A0A0M7HI51_9BURK_Probable_enoyl-CoA_hydratase_1_OS=Achromobacter_aegrifaciens_OX=1287736_GN=ERS370000_02654_PE=4_SV=1~~~tr|A…
3	n49209	1	0	39	1	15	0	0	3.78127e-08	0.00047463	0.706187	6.25023	GCGCCGGCGTTAAAGACTGGGCAACAGGCCTGCCGGCACCAGCGCCGTCAGCCCCTGGCCCGCGATGAGCTGACTCGCCGCCTCGATGTCGGGCGCGAAGAAGCGG	106	tr|A0A446CNW0|A0A446CNW0_9BURK_Histidine_ammonia-lyase_OS=Achromobacter_agilis_OX=1353888_GN=hutH_1_PE=3_SV=1~~~tr|A0A095VG72|A0A095VG72_9BURK_Histidine_ammonia-lyase_OS=Achromobacter_sp._RTa_OX=1532557_GN=hutH_PE=3_SV=1~~~tr|A0A2N8KIT9|A0A2N8KIT9_9BURK_Histidine_ammonia-lyase_OS=Achromobacter_pulmonis_OX=1389932_GN=hutH_PE=3_SV=1~~~tr|A0A446CIN6|A0A446CIN6_9BURK_Histidine_ammonia-lyase_OS=Achrom…
3	n49242	1	0	39	1	15	0	0	3.78127e-08	0.00047463	0.706187	6.25023	CCGTCATCCCGAAGACGACATAGGCGGCAAAGACGACGGGTGCGGCAAAGGCGAGCGTATC	61
3	n49263	1	0	39	1	15	0	0	3.78127e-08	0.00047463	0.706187	6.25023	GCGGGCGGCAAAGACGATGGCGGCGATGCCACCCATCGAATGGCCGAGCAGATCGAAGCGG	61	tr|A0A2N8KNU9|A0A2N8KNU9_9BURK_Alpha/beta_hydrolase_OS=Achromobacter_pulmonis_OX=1389932_GN=C1I89_01665_PE=4_SV=1~~~tr|A0A3S9YZD0|A0A3S9YZD0_9BURK_Alpha/beta_hydrolase_OS=Achromobacter_spanius_OX=217203_GN=ELS24_21885_PE=4_SV=1~~~tr|A0A6S7CGD2|A0A6S7CGD2_9BURK_Esterase_YbfF_OS=Achromobacter_anxifer_OX=1287737_GN=ybfF_PE=3_SV=1~~~tr|A0A658AEJ9|A0A658AEJ9_ALCXX_Alpha/beta_hydrolase_(Fragment)_OS=Al…
3	n49303	1	0	39	1	15	0	0	3.78127e-08	0.00047463	0.706187	6.25023	AGTAGCCAAAGACGCCCGCCAACGCGGCGGCGGCCAGGCCAAGCCATTGGTTGCGCGTCAG	61	tr|A0A0M9HYS0|A0A0M9HYS0_9BURK_Inner_membrane_protein_yedI_OS=Achromobacter_aegrifaciens_OX=1287736_GN=yedI_PE=4_SV=1~~~tr|A0A658AF95|A0A658AF95_ALCXX_DUF808_domain-containing_protein_OS=Alcaligenes_xylosoxydans_xylosoxydans_OX=85698_GN=DAI43_03670_PE=4_SV=1
3	n49481	1	0	39	1	15	0	0	3.78127e-08	0.00047463	0.706187	6.25023	GCCACCCACACGCGCCGCGCAATTGTCGAAAGACGGGCGGGTCATCACGTATTCGTTGGTGGACTCG	67	tr|A0A6S7F6A8|A0A6S7F6A8_9BURK_Putative_TonB-dependent_receptor_BfrD_OS=Achromobacter_insolitus_OX=217204_GN=bfrD_3_PE=3_SV=1~~~tr|A0A6S7CR78|A0A6S7CR78_9BURK_Putative_TonB-dependent_receptor_BfrD_OS=Achromobacter_anxifer_OX=1287737_GN=bfrD_1_PE=3_SV=1~~~tr|A0A7D4E698|A0A7D4E698_9BURK_TonB-dependent_siderophore_receptor_OS=Achromobacter_pestifer_OX=1353889_GN=FOC84_15350_PE=3_SV=1~~~tr|A0A658A2X5…
3	n49487	1	0	39	1	15	0	0	3.78127e-08	0.00047463	0.706187	6.25023	GGCGGACATGTCGTGAATGGAAAGACGGGGATATCGGTCGCCATCAGGTAACGGCGCAAGCC	62	tr|A0A6S7BIR8|A0A6S7BIR8_9BURK_Glutathione_transport_system_permease_protein_GsiC_OS=Achromobacter_deleyi_OX=1353891_GN=gsiC_12_PE=3_SV=1
3	n49497	1	0	39	1	15	0	0	3.78127e-08	0.00047463	0.706187	6.25023	GTTATTTGCAAAGATAACCATGGATAAACTGCAAGCCTTGCGCGTCTTCCTGGACGTGGCC	61	tr|A0A2N8K8Q9|A0A2N8K8Q9_9BURK_Malonyl_CoA-acyl_carrier_protein_transacylase_OS=Achromobacter_pulmonis_OX=1389932_GN=C1I89_32445_PE=3_SV=1~~~tr|A0A424WGQ8|A0A424WGQ8_ALCXX_LysR_family_transcriptional_regulator_OS=Alcaligenes_xylosoxydans_xylosoxydans_OX=85698_GN=DY367_07920_PE=3_SV=1~~~tr|A0A658AD75|A0A658AD75_ALCXX_LysR_family_transcriptional_regulator_OS=Alcaligenes_xylosoxydans_xylosoxydans_OX…
3	n49572	1	0	39	1	15	0	0	3.78127e-08	0.00047463	0.706187	6.25023	CACACTGCCGGCGGAGTTGAGCGGCGTGGAAAGATCCACCGTGCCGCGATAGGTGTCCCAG	61	tr|A0A6S7D888|A0A6S7D888_9BURK_Metal-pseudopaline_receptor_CntO_OS=Achromobacter_piechaudii_OX=72556_GN=cntO_3_PE=3_SV=1~~~tr|D4XEX2|D4XEX2_9BURK_TonB-dependent_siderophore_receptor_OS=Achromobacter_piechaudii_ATCC_43553_OX=742159_GN=HMPREF0004_4019_PE=3_SV=1~~~tr|A0A3S9YXJ5|A0A3S9YXJ5_9BURK_TonB-dependent_siderophore_receptor_OS=Achromobacter_spanius_OX=217203_GN=ELS24_17965_PE=3_SV=1~~~tr|A0A0Q…
3	n49573	1	0	39	1	15	0	0	3.78127e-08	0.00047463	0.706187	6.25023	ACCAGGACGGAGACAATCATGAAAGATCCATATCGCAGCCTTCCCTCGCCCCTGCGCCGCA	61	tr|A0A424W568|A0A424W568_ALCXX_Tripartite_tricarboxylate_transporter_substrate_binding_protein_OS=Alcaligenes_xylosoxydans_xylosoxydans_OX=85698_GN=DY367_28210_PE=3_SV=1~~~tr|A0A0M7DS29|A0A0M7DS29_9BURK_Argininosuccinate_lyase_OS=Achromobacter_aegrifaciens_OX=1287736_GN=ERS370000_00940_PE=3_SV=1
3	n49620	1	0	39	1	15	0	0	3.78127e-08	0.00047463	0.706187	6.25023	GTAAAGATCCGTGGTCAGCAGACTCATCGGCGCGCCG	37	tr|A0A2I8DS38|A0A2I8DS38_9BURK_GGDEF_domain-containing_protein_OS=Achromobacter_sp._AONIH1_OX=1758194_GN=C2U31_15280_PE=4_SV=1~~~tr|A0A7T4E3G2|A0A7T4E3G2_9BURK_Diguanylate_cyclase_OS=Achromobacter_deleyi_OX=1353891_GN=I6I07_29670_PE=4_SV=1~~~tr|F7T4G7|F7T4G7_9BURK_GGDEF_domain-containing_diguanylate_cyclase_5_OS=Achromobacter_insuavis_AXX-A_OX=1003200_GN=AXXA_19189_PE=4_SV=1~~~tr|A0A0Q8X4T1|A0A0Q…
3	n49626	1	0	39	1	15	0	0	3.78127e-08	0.00047463	0.706187	6.25023	CCTGATGAACTCGGCGCTGCGCTGCAAAGATCCGGTGCTGGTCATCGAGCCGCAGCAGCTG	61	tr|A0A3R9GY29|A0A3R9GY29_ACHDE_2-oxoisovalerate_dehydrogenase_OS=Achromobacter_denitrificans_OX=32002_GN=FOC81_30665_PE=4_SV=1~~~tr|A0A5N7ZR06|A0A5N7ZR06_9BURK_2-oxoisovalerate_dehydrogenase_OS=Achromobacter_sp._OX=134375_GN=E2603_20310_PE=4_SV=1~~~tr|A0A446C8E2|A0A446C8E2_9BURK_2-oxoisovalerate_dehydrogenase_subunit_beta_OS=Achromobacter_veterisilvae_OX=2069367_GN=bfmBAB_PE=4_SV=1~~~tr|E3HQT6|E3…
3	n49674	1	0	39	1	15	0	0	3.78127e-08	0.00047463	0.706187	6.25023	GCGGCGGGTGGTCCGTTCGAGTTCGCGATGCTCGTGGGTCAGGTGCATGGCTGTTTCCGGTTGGTTCAGTTGGCTGCCGGCGCGCCGGCGTCGGCTAGCGTGACGTGGCCGGCGATCAGCGCGACGCCGCCGGCATCTCTTACCCAGACGTCATATCTCCCTGGTGCATCGGCCACGCATTGGCCGCCTGCGGTGATGAGGCCGCCGGCATGCAGCGGCTTGAGAAAGCGGATGTCCAGGTCGAATCGTTCCAGCGCCGCGGCACCGAAGCTGCGCGCCAGCGATTGCCAGATCAGGTTGACCGACAGCGTGCCGTGGGCGATGGTGCCGCCCATGGGCGTGGCCGAGGCGAATGCCGGATCTACGTGCAGGGGATTGAAGTCGTTGGTCAGTTCGGCA…	671	tr|A0A2S0IDD6|A0A2S0IDD6_9BURK_Acyl_dehydratase_OS=Achromobacter_spanius_OX=217203_GN=CLM73_24765_PE=4_SV=1~~~tr|A0A5K4ZH21|A0A5K4ZH21_ALCXX_TonB-dependent_siderophore_receptor_OS=Alcaligenes_xylosoxydans_xylosoxydans_OX=85698_GN=AL520_09550_PE=4_SV=1~~~tr|A0A6S7E777|A0A6S7E777_9BURK_Metal-pseudopaline_receptor_CntO_OS=Achromobacter_ruhlandii_OX=72557_GN=cntO_3_PE=3_SV=1~~~tr|A0A6S7DTF2|A0A6S7DTF…
3	n49701	1	0	39	1	15	0	0	3.78127e-08	0.00047463	0.706187	6.25023	GATGCAGCACGTGGATCGCGACGGCCGGCCAAAGATCGTGCCCGCATGCACTTATCCCCTT	61	tr|J4J669|J4J669_9BURK_3-oxoadipate_CoA-transferase_subunit_B_OS=Achromobacter_marplatensis_OX=470868_GN=QWC_27097_PE=3_SV=1~~~tr|A0A6S7DMG9|A0A6S7DMG9_9BURK_3-oxoadipate_CoA-transferase_subunit_B_OS=Achromobacter_piechaudii_OX=72556_GN=pcaJ_2_PE=3_SV=1~~~tr|D4X3W5|D4X3W5_9BURK_3-oxoacid_CoA-transferase,_B_subunit_OS=Achromobacter_piechaudii_ATCC_43553_OX=742159_GN=pcaJ_PE=3_SV=1~~~tr|A0A3S5E5R1|…
3	n49783	1	0	39	1	15	0	0	3.78127e-08	0.00047463	0.706187	6.25023	CCAAATCGAACTGCAAAGGTTCGCAAAGATTGCGGCAATCATGCCGCAAGAGCCCCATCCG	61
3	n49798	1	0	39	1	15	0	0	3.78127e-08	0.00047463	0.706187	6.25023	GCAGGCGGCCCACGAGCTGCTGCAGTCGGCCGGCCGAAAGATTGGTCTTGGCGAACCCGCCCGCAGTGCGCACGGTCAGACGGTCCTCGCGC	92	tr|D4XJP2|D4XJP2_9BURK_POTRA_domain_protein,_ShlB-type_OS=Achromobacter_piechaudii_ATCC_43553_OX=742159_GN=HMPREF0004_5689_PE=3_SV=1~~~tr|A0A6S7C726|A0A6S7C726_9BURK_Heme/hemopexin_transporter_protein_HuxB_OS=Achromobacter_piechaudii_OX=72556_GN=hxuB_1_PE=3_SV=1~~~tr|A0A2S5GRA4|A0A2S5GRA4_9BURK_Uncharacterized_protein_OS=Achromobacter_spanius_OX=217203_GN=C4E15_14800_PE=4_SV=1~~~tr|A0A448CAY6|A0A…
3	n49805	1	0	39	1	15	0	0	3.78127e-08	0.00047463	0.706187	6.25023	CACGCGATGCAGGATCAGATTGCTGGGCACTTCAAAGATGAAGTAACCCAGAAAGAAAATGCCGGCCCCCAAGCCGTAGACCGTTTCCGACATCGACAGGTC	102	tr|A0A0X8BTU3|A0A0X8BTU3_9PSED_MFS_transporter_permease_OS=Pseudomonas_monteilii_OX=76759_GN=APT63_07115_PE=4_SV=1~~~tr|A0A424WC50|A0A424WC50_ALCXX_MFS_transporter_OS=Alcaligenes_xylosoxydans_xylosoxydans_OX=85698_GN=DY367_16350_PE=4_SV=1~~~tr|A0A0M7KEA0|A0A0M7KEA0_9BURK_Inner_membrane_transport_protein_RhmT_OS=Achromobacter_aegrifaciens_OX=1287736_GN=rhmT_7_PE=4_SV=1~~~tr|A0A0M7LL69|A0A0M7LL69_9…
3	n49808	1	0	39	1	15	0	0	3.78127e-08	0.00047463	0.706187	6.25023	TGCTACCGGCTGATGGATGACGACGTCCCTTACCCCAGCGCCTTCCCGACCGCGAAAGGCGCACCTACACCATACAAAGATGACGACGGGGGGGGGGGGGCCGCCGAGGCCAGTCCGGA	119	tr|A0A366FMR6|A0A366FMR6_9BURK_Uncharacterized_protein_(Fragment)_OS=Achromobacter_marplatensis_OX=470868_GN=DFP87_1121_PE=4_SV=1~~~tr|A0A6S7D6Q2|A0A6S7D6Q2_9BURK_Helicase_C-terminal_domain-containing_protein_OS=Achromobacter_anxifer_OX=1287737_GN=LMG26858_03223_PE=4_SV=1~~~tr|A0A366F3A8|A0A366F3A8_9BURK_Uncharacterized_protein_(Fragment)_OS=Achromobacter_marplatensis_OX=470868_GN=DFP87_1402_PE=4…
3	n49838	1	0	39	1	15	0	0	3.78127e-08	0.00047463	0.706187	6.25023	GGGAAAGATGAGATCTATGTTTATCAGCGCCGCCACATGCTGGCCATGGGGACCCAGGTATTGCTTGCT	69	tr|A0A0M7LGW9|A0A0M7LGW9_9BURK_ATP-binding_protein_Uup_OS=Achromobacter_aegrifaciens_OX=1287736_GN=yjjK_PE=3_SV=1~~~tr|A0A6S7EPA7|A0A6S7EPA7_9BURK_ATP-binding_protein_Uup_OS=Achromobacter_anxifer_OX=1287737_GN=uup_PE=3_SV=1~~~tr|A0A424WDW9|A0A424WDW9_ALCXX_ATP-binding_protein_Uup_OS=Alcaligenes_xylosoxydans_xylosoxydans_OX=85698_GN=uup_PE=3_SV=1~~~tr|E3HGD0|E3HGD0_ACHXA_ATP-binding_protein_Uup_OS…
3	n49871	1	0	39	1	15	0	0	3.78127e-08	0.00047463	0.706187	6.25023	CTTGTTGGTGTCGCCCTCGCCGCCCAGGGAAAGATGCTTCAGGCGCGCGGTGATCTGGCCG	61	tr|A0A5K6EWR6|A0A5K6EWR6_ALCXX_TIGR02099_family_protein_OS=Alcaligenes_xylosoxydans_xylosoxydans_OX=85698_GN=AL520_14045_PE=4_SV=1~~~tr|A0A6S7EKQ4|A0A6S7EKQ4_9BURK_Uncharacterized_protein_OS=Achromobacter_ruhlandii_OX=72557_GN=LMG3328_04941_PE=4_SV=1~~~tr|A0A424W8P5|A0A424W8P5_ALCXX_TIGR02099_family_protein_OS=Alcaligenes_xylosoxydans_xylosoxydans_OX=85698_GN=DY367_22075_PE=4_SV=1~~~tr|A0A0M7MFB7…
3	n49909	1	0	39	1	15	0	0	3.78127e-08	0.00047463	0.706187	6.25023	CGCCGTGATCTGGGAAGGGAAAGATGTGTACCGGCTGAAGTCAGGCGAAATCCTCAGACCAGTGAATCGGCGGAAGAAAAAGAGTCCTTTTGAAGGGTAGCGAAGAAAA	109	tr|A0A246PYW1|A0A246PYW1_9BURK_Fimbrial_protein_OS=Achromobacter_sp._HZ28_OX=2015171_GN=CEY04_29075_PE=4_SV=1~~~tr|A0A0M7GRI0|A0A0M7GRI0_9BURK_Uncharacterized_protein_OS=Achromobacter_aegrifaciens_OX=1287736_GN=ERS370000_02352_PE=4_SV=1~~~tr|E3HI77|E3HI77_ACHXA_Uncharacterized_protein_OS=Achromobacter_xylosoxidans_(strain_A8)_OX=762376_GN=AXYL_04621_PE=4_SV=1~~~tr|A0A6S7F8N2|A0A6S7F8N2_9BURK_Unch…
3	n50034	1	0	39	1	15	0	0	3.78127e-08	0.00047463	0.706187	6.25023	GGCGTAACAAAGAGATACCAGCAGAACCCCCGGCTGTTCACGCCGCTGCCCCGTCACGGCA	61
3	n50076	1	0	39	1	15	0	0	3.78127e-08	0.00047463	0.706187	6.25023	AAAGAGAGCGATCGCCAGCCGCCCTGGCTGTTGATCAAGGAAAACGACGAGTACGCGCGGC	61	tr|A0A2S5GK48|A0A2S5GK48_9BURK_3\'-phosphoesterase_OS=Achromobacter_spanius_OX=217203_GN=ligD_PE=4_SV=1~~~tr|A0A6S7AT25|A0A6S7AT25_9BURK_3\'-phosphoesterase_OS=Achromobacter_kerstersii_OX=1353890_GN=ligD_2_PE=4_SV=1~~~tr|A0A0Q8XEF2|A0A0Q8XEF2_9BURK_3\'-phosphoesterase_OS=Achromobacter_sp._Root83_OX=1736602_GN=ligD_PE=4_SV=1~~~tr|D4XDA0|D4XDA0_9BURK_3\'-phosphoesterase_OS=Achromobacter_piechaudii_…
3	n50311	1	0	39	1	15	0	0	3.78127e-08	0.00047463	0.706187	6.25023	GGCGATGAACAAAGAGGAGATCCCTCCTCTTACCGTGGATGTCATCGCCTCCACCTTCGGG	61	tr|A0A1N7P198|A0A1N7P198_9BURK_DUF4942_domain-containing_protein_OS=Achromobacter_sp._MFA1_R4_OX=1881016_GN=SAMN05428937_0363_PE=4_SV=1~~~tr|D4XHF7|D4XHF7_9BURK_DUF4942_domain-containing_protein_OS=Achromobacter_piechaudii_ATCC_43553_OX=742159_GN=HMPREF0004_4904_PE=4_SV=1~~~tr|A0A7D4DVH6|A0A7D4DVH6_9BURK_Heme_ABC_exporter_ATP-binding_protein_CcmA_OS=Achromobacter_pestifer_OX=1353889_GN=ccmA_PE=4_…
3	n50456	1	0	39	1	15	0	0	3.78127e-08	0.00047463	0.706187	6.25023	TGACACTTAATAAAGCAACACTTATCTTTATGCCAACCTACTAGCC	46
3	n50509	1	0	39	1	15	0	0	3.78127e-08	0.00047463	0.706187	6.25023	GCCGCAGTCCACGGCCAGCTACGAAAGCAATCCGAACGCAGGCGCGCTGCCGCCGTCCAAC	61	tr|A0A366FX61|A0A366FX61_9BURK_Hemoglobin/transferrin/lactoferrin_receptor_protein_OS=Achromobacter_marplatensis_OX=470868_GN=DFP87_105351_PE=3_SV=1~~~tr|A0A2S8V8X3|A0A2S8V8X3_9BURK_TonB-dependent_receptor_OS=Achromobacter_sp._MYb9_OX=1827284_GN=CQ050_18625_PE=3_SV=1~~~tr|J4J8R9|J4J8R9_9BURK_TonB-dependent_siderophore_receptor_family_protein_17_OS=Achromobacter_marplatensis_OX=470868_GN=QWC_03533…
3	n50548	1	0	39	1	15	0	0	3.78127e-08	0.00047463	0.706187	6.25023	CTGCGAGACAGTCAAAGCAAGCCAGCCCCCAGCTGCGCGCAGCGCCATCACCAATCGCAAG	61
3	n50676	1	0	39	1	15	0	0	3.78127e-08	0.00047463	0.706187	6.25023	GGTGATGTCGCCGAGCGCCAGCGTGTACGAAAGCACCTTCGTGGTGAAGGCGTAGGTCGCG	61	tr|A0A6S7A5D2|A0A6S7A5D2_9BURK_Haemagg_act_domain-containing_protein_OS=Achromobacter_animicus_OX=1389935_GN=LMG26690_02699_PE=4_SV=1~~~tr|A0A366G1S2|A0A366G1S2_9BURK_Small-conductance_mechanosensitive_channel_OS=Achromobacter_marplatensis_OX=470868_GN=DFP87_10321_PE=3_SV=1~~~tr|J4Y3U6|J4Y3U6_9BURK_Mechanosensitive_ion_channel_OS=Achromobacter_marplatensis_OX=470868_GN=QWC_26283_PE=3_SV=1~~~tr|A0…
3	n50762	1	0	39	1	15	0	0	3.78127e-08	0.00047463	0.706187	6.25023	TGTGAGCCGTCCGGACCGGCCCCGCCTCATAAAGCACTGGAAGACGGGGACGGATGGCGGAGGCGTGCATCGCTACGACTTCGAT	85	tr|A0A658A6F8|A0A658A6F8_ALCXX_Uncharacterized_protein_OS=Alcaligenes_xylosoxydans_xylosoxydans_OX=85698_GN=DAI43_37060_PE=4_SV=1~~~tr|A0A0M7DRR6|A0A0M7DRR6_9BURK_Uncharacterized_conserved_protein_OS=Achromobacter_aegrifaciens_OX=1287736_GN=ERS370000_00968_PE=4_SV=1~~~tr|A0A424W7M0|A0A424W7M0_ALCXX_Uncharacterized_protein_OS=Alcaligenes_xylosoxydans_xylosoxydans_OX=85698_GN=DY367_23905_PE=4_SV=1~…
3	n51227	1	0	39	1	15	0	0	3.78127e-08	0.00047463	0.706187	6.25023	AACCACGAAGACAAAGCAGGCCGTTACCGAGTAAAGGCGCGGCGCAGCTTGCGCCCGCGAA	61
3	n51231	1	0	39	1	15	0	0	3.78127e-08	0.00047463	0.706187	6.25023	AGAAGGGAAAGCAGGCGCGGAACGAACGGACATCAAGGCGCCGGCCATTCTTGACGGAAAAGTTCTGGCCTAACATATGGGCCCTG	86
3	n51446	1	0	39	1	15	0	0	3.78127e-08	0.00047463	0.706187	6.25023	GTTCGTGGTGGACTGGCTGCAAAAGCGTCCTGAAGGCCGCAAGCCGCCACGGTAGCTGCGCCCCCAATTCCGCCTAAAGCCACGTGCTACCATGCCGGCGGAAGGGCGCAACGCAGACGCCAGGGACACGGATCAGCCTGGCCACCCCAAGCCGTGGAGCGCCTGCCGACCCGCACAGGAAGCGACACGGATTCGAGCATG	201	tr|A0A366FWM1|A0A366FWM1_9BURK_GntR_family_transcriptional_regulator_OS=Achromobacter_marplatensis_OX=470868_GN=DFP87_105160_PE=4_SV=1~~~tr|J4J6M0|J4J6M0_9BURK_GntR_family_transcriptional_regulator_OS=Achromobacter_marplatensis_OX=470868_GN=QWC_23475_PE=4_SV=1~~~tr|A0A0M7FI69|A0A0M7FI69_9BURK_Carbon_starvation_induced_regulator_OS=Achromobacter_aegrifaciens_OX=1287736_GN=csiR_3_PE=4_SV=1~~~tr|A0A…
3	n51463	1	0	39	1	15	0	0	3.78127e-08	0.00047463	0.706187	6.25023	CCCGGACGTGAAAGCCATCAGCTTCGTCGGATCCACGCCCATCGCCAACTACATCTACGAG	61	tr|A0A6S7FKA9|A0A6S7FKA9_9BURK_3-oxopropanoate_dehydrogenase_OS=Achromobacter_insolitus_OX=217204_GN=bauC_2_PE=4_SV=1~~~tr|A0A0M7BVX4|A0A0M7BVX4_9BURK_Methylmalonate-semialdehyde_dehydrogenase_[acylating]_OS=Achromobacter_aegrifaciens_OX=1287736_GN=mmsA_1_PE=4_SV=1~~~tr|A0A4Q1HKV5|A0A4Q1HKV5_9BURK_Methylmalonate-semialdehyde_dehydrogenase_(CoA_acylating)_OS=Achromobacter_aloeverae_OX=1750518_GN=m…
3	n51604	1	0	39	1	15	0	0	3.78127e-08	0.00047463	0.706187	6.25023	GCTCAGTTCGCCCATCCTGAAAGCCAGCCAGAACCTGGCGCTGCATCTGGTCACCAGCACCACGCGGCGCATCGAG	76	tr|A0A2S8VEE5|A0A2S8VEE5_9BURK_Sigma-54-dependent_Fis_family_transcriptional_regulator_OS=Achromobacter_sp._MYb9_OX=1827284_GN=CQ050_12070_PE=4_SV=1~~~tr|A0A448C2Z7|A0A448C2Z7_9BURK_Acetoin_catabolism_regulatory_protein_OS=Achromobacter_spanius_OX=217203_GN=acoR_1_PE=4_SV=1~~~tr|A0A3Q9KP28|A0A3Q9KP28_9BURK_Sigma-54-dependent_Fis_family_transcriptional_regulator_OS=Achromobacter_spanius_OX=217203_…
3	n51637	1	0	39	1	15	0	0	3.78127e-08	0.00047463	0.706187	6.25023	TACCTTACTCGCAATGCAAAGCCAGCGTTGACGCCTCAGATCGGCATATTGAAATAGACGA	61	tr|A0A6S7BZG6|A0A6S7BZG6_9BURK_Toxin_RTX-I_translocation_ATP-binding_protein_OS=Achromobacter_piechaudii_OX=72556_GN=apxIB_PE=4_SV=1~~~tr|A0A424W9C8|A0A424W9C8_ALCXX_Peptidase_domain-containing_ABC_transporter_OS=Alcaligenes_xylosoxydans_xylosoxydans_OX=85698_GN=DY367_20410_PE=4_SV=1~~~tr|A0A2S5GYZ9|A0A2S5GYZ9_9BURK_ABC_transporter_OS=Achromobacter_spanius_OX=217203_GN=C4E15_02815_PE=4_SV=1~~~tr|…
3	n51671	1	0	39	1	15	0	0	3.78127e-08	0.00047463	0.706187	6.25023	CAGCGCCTGACGCACCGGCCATGACTGCCAAAGCCAGGCGATCTCCGACACGGCCAGCAGC	61	tr|A0A0M7F1H2|A0A0M7F1H2_9BURK_Uncharacterized_protein_conserved_in_bacteria_OS=Achromobacter_aegrifaciens_OX=1287736_GN=ERS370000_01494_PE=4_SV=1~~~tr|A0A658ADL8|A0A658ADL8_ALCXX_DotU_family_type_IV/VI_secretion_system_protein_OS=Alcaligenes_xylosoxydans_xylosoxydans_OX=85698_GN=DAI43_11490_PE=4_SV=1~~~tr|A0A6S7CZZ7|A0A6S7CZZ7_9BURK_DotU_domain-containing_protein_OS=Achromobacter_anxifer_OX=1287…
3	n51689	1	0	39	1	15	0	0	3.78127e-08	0.00047463	0.706187	6.25023	GTGTTCCGGCGCGAAAGCCAGGCGCGCCGCGGCGCCCGGGCCCAGCCCCGACGGCGCAATG	61	tr|A0A448C0T4|A0A448C0T4_9BURK_Spermidine/putrescine_import_ATP-binding_protein_PotA_OS=Achromobacter_spanius_OX=217203_GN=potA_2_PE=4_SV=1~~~tr|A0A6S7AWF7|A0A6S7AWF7_9BURK_Spermidine/putrescine_import_ATP-binding_protein_PotA_OS=Achromobacter_kerstersii_OX=1353890_GN=potA_6_PE=3_SV=1~~~tr|A0A6S7DAG5|A0A6S7DAG5_9BURK_Spermidine/putrescine_import_ATP-binding_protein_PotA_OS=Achromobacter_piechaudi…
3	n51943	1	0	39	1	15	0	0	3.78127e-08	0.00047463	0.706187	6.25023	AAAGCCCCAGCCCCGGTTCTGCATGGCGATGCCCGTTCCCGGCACCACCACGCCGGAACCG	61	tr|A0A246QBG3|A0A246QBG3_9BURK_Hydantoinase_OS=Achromobacter_sp._HZ28_OX=2015171_GN=CEY04_05165_PE=4_SV=1~~~tr|J4YWQ7|J4YWQ7_9BURK_Glutathione_hydrolase_proenzyme_OS=Achromobacter_marplatensis_OX=470868_GN=QWC_00230_PE=3_SV=1~~~tr|A0A5N7ZT01|A0A5N7ZT01_9BURK_Glutathione_hydrolase_proenzyme_OS=Achromobacter_sp._OX=134375_GN=ggt_PE=3_SV=1~~~tr|A0A366G164|A0A366G164_9BURK_Glutathione_hydrolase_proen…
3	n52205	1	0	39	1	15	0	0	3.78127e-08	0.00047463	0.706187	6.25023	CGCCGGATCACGAAAGCCCGCGTCCACGCTACCGTAGCGTTCGATGGGTTCCTGCGTGAAC	61	tr|A0A0M7EIB5|A0A0M7EIB5_ALCXX_Predicted_enzyme_related_to_lactoylglutathione_lyase_OS=Alcaligenes_xylosoxydans_xylosoxydans_OX=85698_GN=ERS369984_01771_PE=4_SV=1~~~tr|A0A0D6HHF4|A0A0D6HHF4_ALCXX_Predicted_enzyme_related_to_lactoylglutathione_lyase_OS=Alcaligenes_xylosoxydans_xylosoxydans_OX=85698_GN=ERS451415_02579_PE=4_SV=1~~~tr|A0A6N0JJ73|A0A6N0JJ73_ACHDE_VOC_family_protein_OS=Achromobacter_de…
3	n52473	1	0	39	1	15	0	0	3.78127e-08	0.00047463	0.706187	6.25023	TGCAGGGCGTAAGCCTGGTTCTGGTAGTCGGTCAGGAAAGCCTTGCGCACCGCCACCACCCGCTCCAGTTCGC	73	tr|A0A2N8KJ91|A0A2N8KJ91_9BURK_Indolepyruvate_ferredoxin_oxidoreductase_OS=Achromobacter_pulmonis_OX=1389932_GN=C1I89_13680_PE=3_SV=1~~~tr|A0A7Y4NLZ4|A0A7Y4NLZ4_9BURK_Indolepyruvate_ferredoxin_oxidoreductase_family_protein_OS=Achromobacter_deleyi_OX=1353891_GN=HLG70_20505_PE=3_SV=1~~~tr|A0A095W4V1|A0A095W4V1_9BURK_Indolepyruvate_ferredoxin_oxidoreductase_OS=Achromobacter_sp._RTa_OX=1532557_GN=JL3…
3	n52484	1	0	39	1	15	0	0	3.78127e-08	0.00047463	0.706187	6.25023	GTCCGTGGGCGCGATCTGCGCGGCAAAGCCTTGCGGACCGGCGTCGTCGAAGTCCAGCACC	61	tr|A0A6S6Z3R7|A0A6S6Z3R7_9BURK_Long-chain-fatty-acid--CoA_ligase_OS=Achromobacter_pestifer_OX=1353889_GN=lcfB_8_PE=4_SV=1~~~tr|J4Z4W7|J4Z4W7_9BURK_AMP-binding_protein_OS=Achromobacter_marplatensis_OX=470868_GN=QWC_00570_PE=4_SV=1~~~tr|A0A366GBC2|A0A366GBC2_9BURK_Acyl-CoA_synthetase_(AMP-forming)/AMP-acid_ligase_II_OS=Achromobacter_marplatensis_OX=470868_GN=DFP87_101733_PE=4_SV=1~~~tr|A0A2S8V7Z2|A…
3	n52517	1	0	39	1	15	0	0	3.78127e-08	0.00047463	0.706187	6.25023	GTCCGGATCCTCGAGCATGTCGCGTATAAAGCCTTGGTCGATCTTGAGCAGGTGCGCGGGC	61	tr|A0A0X8BXW9|A0A0X8BXW9_9PSED_PAS_domain_S-box_protein_OS=Pseudomonas_monteilii_OX=76759_GN=APT63_15130_PE=4_SV=1~~~tr|A0A109Q4S0|A0A109Q4S0_9PSED_Histidine_kinase_OS=Pseudomonas_monteilii_OX=76759_GN=APT63_14210_PE=4_SV=1~~~tr|A0A109PX92|A0A109PX92_9PSED_Diguanylate_cyclase_OS=Pseudomonas_monteilii_OX=76759_GN=APT63_01585_PE=4_SV=1~~~tr|A0A2I8DFG5|A0A2I8DFG5_9BURK_Uncharacterized_protein_OS=Ach…
3	n52534	1	0	39	1	15	0	0	3.78127e-08	0.00047463	0.706187	6.25023	GCAAAGCCTGAAGGGCCGCTACACCATCGTACTGGTCGAACACGATATGAACGCCGTGTTTGCGCTGGCCGACCGC	76	tr|A0A448C3G4|A0A448C3G4_9BURK_Lipopolysaccharide_export_system_ATP-binding_protein_LptB_OS=Achromobacter_spanius_OX=217203_GN=lptB_5_PE=4_SV=1~~~tr|H0FFS0|H0FFS0_9BURK_ABC_transporter_OS=Achromobacter_arsenitoxydans_SY8_OX=477184_GN=KYC_28202_PE=4_SV=1~~~tr|A0A0Q8WU44|A0A0Q8WU44_9BURK_ABC_transporter_ATP-binding_protein_OS=Achromobacter_sp._Root83_OX=1736602_GN=ASE30_10270_PE=4_SV=1~~~tr|A0A6S7A…
3	n52574	1	0	39	1	15	0	0	3.78127e-08	0.00047463	0.706187	6.25023	AAAGCCTGCCACGGCTTGATTCGCGGCTGCTGCTCGCCAGGCGGTCTGATCTTCCGGCAGATCGGCCGCGCGCTCATCCATGAATCAGACTAATT	95	tr|A0A7X9W4V5|A0A7X9W4V5_9BURK_Iron_ABC_transporter_permease_OS=Achromobacter_sp._Bel_OX=2727415_GN=HG262_22755_PE=3_SV=1~~~tr|A0A2S0I1I3|A0A2S0I1I3_9BURK_Uncharacterized_protein_OS=Achromobacter_spanius_OX=217203_GN=CLM73_01415_PE=4_SV=1
3	n52583	1	0	39	1	15	0	0	3.78127e-08	0.00047463	0.706187	6.25023	GACCATGTTGACCACGCCTTCGGGAAAGCCTGCCTGGGCCATCAGTTCGGCGATACGCAGGGTCGACAGGGGGGTGAGTTCGGAAGGCTTTAGCACCACCGTGTTGCCGGCCGCCAGCGCCGGCCCCAGCTTCCAGCTGGTGAACATCAGCGGG	154	tr|A0A6S7FKA9|A0A6S7FKA9_9BURK_3-oxopropanoate_dehydrogenase_OS=Achromobacter_insolitus_OX=217204_GN=bauC_2_PE=4_SV=1~~~tr|A0A0M7BVX4|A0A0M7BVX4_9BURK_Methylmalonate-semialdehyde_dehydrogenase_[acylating]_OS=Achromobacter_aegrifaciens_OX=1287736_GN=mmsA_1_PE=4_SV=1~~~tr|A0A7D4IML0|A0A7D4IML0_9BURK_Aldehyde_dehydrogenase_OS=Achromobacter_pestifer_OX=1353889_GN=FOC84_30225_PE=3_SV=1~~~tr|A0A7Y4K4G9…
3	n52597	1	0	39	1	15	0	0	3.78127e-08	0.00047463	0.706187	6.25023	TGCGAAAGCCTGCTCGACCGCGTCGGCGTCCGTGACCGACGCTTGCACGGCCAGCGCCTCG	61	tr|A0A0X8P1X7|A0A0X8P1X7_ALCXX_3-oxoacyl-ACP_reductase_FabG_OS=Alcaligenes_xylosoxydans_xylosoxydans_OX=85698_GN=AL504_21725_PE=4_SV=1~~~tr|F7SY23|F7SY23_9BURK_Short_chain_dehydrogenase_family_protein_60_OS=Achromobacter_insuavis_AXX-A_OX=1003200_GN=AXXA_07869_PE=4_SV=1~~~tr|A0A1R1K002|A0A1R1K002_ALCXX_Short-chain_dehydrogenase_OS=Alcaligenes_xylosoxydans_xylosoxydans_OX=85698_GN=BIZ92_00060_PE=4…
3	n52629	1	0	39	1	15	0	0	3.78127e-08	0.00047463	0.706187	6.25023	GCCGGCGAAAGCCTGTTCGGTGGCGCGTTCGTTCTTCAGATAGCCCTTCATGCAGATGTTG	61	tr|A0A6S7F757|A0A6S7F757_9BURK_Long-chain-fatty-acid--CoA_ligase_OS=Achromobacter_insolitus_OX=217204_GN=LMG6000_01634_PE=4_SV=1~~~tr|A0A4Q1HKS2|A0A4Q1HKS2_9BURK_Acyl-CoA_synthetase_OS=Achromobacter_aloeverae_OX=1750518_GN=C7R54_07445_PE=4_SV=1~~~tr|A0A6S7CMZ4|A0A6S7CMZ4_9BURK_Long-chain-fatty-acid--CoA_ligase_OS=Achromobacter_dolens_OX=1287738_GN=LMG26841_02259_PE=4_SV=1~~~tr|A0A6J5ADM8|A0A6J5AD…
3	n52772	1	0	39	1	15	0	0	3.78127e-08	0.00047463	0.706187	6.25023	CCGCATCGAAGAGCGCAACGGCGGCGTCAAAGCCTGGGTCCGGGTGGACGCCGAGGGCGCG	61	tr|J4PFR4|J4PFR4_9BURK_Amidase_OS=Achromobacter_marplatensis_OX=470868_GN=QWC_07154_PE=4_SV=1~~~tr|A0A2S8V367|A0A2S8V367_9BURK_Amidase_OS=Achromobacter_sp._MYb9_OX=1827284_GN=CQ050_25725_PE=4_SV=1~~~tr|A0A6S7CQN3|A0A6S7CQN3_9BURK_Mandelamide_hydrolase_OS=Achromobacter_piechaudii_OX=72556_GN=mdlY_2_PE=4_SV=1~~~tr|A0A7X9W5V4|A0A7X9W5V4_9BURK_Amidase_OS=Achromobacter_sp._Bel_OX=2727415_GN=HG262_2536…
3	n52810	1	0	39	1	15	0	0	3.78127e-08	0.00047463	0.706187	6.25023	CACAAAGCCGAAGCGGCAGGGCTTCGAGCTTGCGGAT	37
3	n52877	1	0	39	1	15	0	0	3.78127e-08	0.00047463	0.706187	6.25023	CGGGTTCGGCACGGCAAAGCCGATGGGGCTATTGCCGACGCGTGCGTCGGTGCCGCCCCAGGGGGCGATGGTG	73	tr|A0A6S6ZT63|A0A6S6ZT63_9BURK_L-lactate_dehydrogenase_OS=Achromobacter_pestifer_OX=1353889_GN=ldh_PE=3_SV=1~~~tr|A0A7X9W770|A0A7X9W770_9BURK_Ldh_family_oxidoreductase_OS=Achromobacter_sp._Bel_OX=2727415_GN=HG262_28965_PE=3_SV=1~~~tr|A0A2I8DD11|A0A2I8DD11_9BURK_Lactate_dehydrogenase_OS=Achromobacter_sp._AONIH1_OX=1758194_GN=C2U31_03120_PE=3_SV=1~~~tr|A0A2S8VJN8|A0A2S8VJN8_9BURK_Lactate_dehydrogen…
3	n52895	1	0	39	1	15	0	0	3.78127e-08	0.00047463	0.706187	6.25023	GGCGCACGGCCTGGTCCGCGCGCGCGACAAAGCCGAGTACGTCGCCGGGCTGATGCGCCAG	61	tr|A0A2I8DF55|A0A2I8DF55_9BURK_Peptide_ABC_transporter_ATP-binding_protein_OS=Achromobacter_sp._AONIH1_OX=1758194_GN=C2U31_04845_PE=4_SV=1~~~tr|A0A0L8ETR4|A0A0L8ETR4_9BURK_Peptide_ABC_transporter_ATP-binding_protein_OS=Achromobacter_sp._DMS1_OX=1688405_GN=AD428_04965_PE=4_SV=1~~~tr|A0A6S7AEQ5|A0A6S7AEQ5_9BURK_Putative_D,D-dipeptide_transport_ATP-binding_protein_DdpF_OS=Achromobacter_kerstersii_OX…
3	n52930	1	0	39	1	15	0	0	3.78127e-08	0.00047463	0.706187	6.25023	GCTGCCGTCCGGTCCGACCTGGGGCTTGCCCGTGGTCAAGGTGGCGCGGTCCGCATTCAGAAAGCCGCAGCCGTTGCAGGTAATGCCCGCCGGGTTGGCGACG	103	tr|A0A0M9IIT3|A0A0M9IIT3_ALCXX_Filamentous_hemagglutinin_OS=Alcaligenes_xylosoxydans_xylosoxydans_OX=85698_GN=fhaB_1_PE=4_SV=1~~~tr|A0A6S6YJZ9|A0A6S6YJZ9_9BURK_Haemagg_act_domain-containing_protein_OS=Achromobacter_pestifer_OX=1353889_GN=LMG3431_00536_PE=4_SV=1~~~tr|A0A6S7E6W4|A0A6S7E6W4_9BURK_Haemagg_act_domain-containing_protein_OS=Achromobacter_piechaudii_OX=72556_GN=LMG1861_04152_PE=4_SV=1~~~…
3	n52974	1	0	39	1	15	0	0	3.78127e-08	0.00047463	0.706187	6.25023	TTGACCAGAACGGAAAGCCGCCCGTTGGGCGGCGGCGCGCGCCTTATTGCTGGCGACGCTG	61
3	n53065	1	0	39	1	15	0	0	3.78127e-08	0.00047463	0.706187	6.25023	CCCGATCAGTACCGCATTACCCGGCAGGACTTGAAAGCCGCGCTGGCGCGCAAGAAGACCGAGCTGCGCGAAGGCGACATCG	82	tr|E3HWH2|E3HWH2_ACHXA_Cyclase_family_protein_2_OS=Achromobacter_xylosoxidans_(strain_A8)_OX=762376_GN=AXYL_05485_PE=4_SV=1~~~tr|A0A7D4I9C5|A0A7D4I9C5_9BURK_Cyclase_family_protein_OS=Achromobacter_pestifer_OX=1353889_GN=FOC84_18395_PE=4_SV=1~~~tr|A0A658A7S4|A0A658A7S4_ALCXX_Cyclase_(Fragment)_OS=Alcaligenes_xylosoxydans_xylosoxydans_OX=85698_GN=DAI43_21605_PE=4_SV=1~~~tr|A0A424WKT2|A0A424WKT2_ALC…
3	n53221	1	0	39	1	15	0	0	3.78127e-08	0.00047463	0.706187	6.25023	AAAGCCGTGGAACCACGAACAGTCGATGACACCCGGCAGCGCGGCCAGCTTGGCGCATACG	61	tr|A0A2I8DGZ3|A0A2I8DGZ3_9BURK_Microcystinase_C_OS=Achromobacter_sp._AONIH1_OX=1758194_GN=C2U31_12005_PE=3_SV=1~~~tr|A0A0M7CBS0|A0A0M7CBS0_9BURK_Microcystinase_C_OS=Achromobacter_aegrifaciens_OX=1287736_GN=ERS370000_00229_PE=3_SV=1~~~tr|A0A6S7DYK4|A0A6S7DYK4_9BURK_Phospholipase_C_OS=Achromobacter_ruhlandii_OX=72557_GN=LMG3328_02574_PE=3_SV=1~~~tr|A0A5K4YDR4|A0A5K4YDR4_ALCXX_Acid_phosphatase_OS=Al…
3	n53363	1	0	39	1	15	0	0	3.78127e-08	0.00047463	0.706187	6.25023	CAGCAGGCGCAGCACCAGGGCCAGCGCCAGATCTTCCTGGAACGAGGTCACCTCGCGCGACCGCAGAAAGCCGGTCAGGTAGGCGGTGGACGGATACGGAGTATTG	106	tr|A0A848NS11|A0A848NS11_9BURK_TonB-dependent_receptor_OS=Achromobacter_ruhlandii_OX=72557_GN=HGQ98_27820_PE=4_SV=1~~~tr|A0A6S6ZZY5|A0A6S6ZZY5_9BURK_Uncharacterized_protein_OS=Achromobacter_deleyi_OX=1353891_GN=LMG3458_02787_PE=4_SV=1~~~tr|A0A0Q8BNY1|A0A0Q8BNY1_9BURK_Radical_SAM_protein_OS=Achromobacter_sp._Root565_OX=1736564_GN=ASD71_07375_PE=4_SV=1~~~tr|A0A3S4MXT9|A0A3S4MXT9_9BURK_Bacteriocin_m…
3	n53446	1	0	39	1	15	0	0	3.78127e-08	0.00047463	0.706187	6.25023	CGTGTCTTCGGAATCAAGAAAGCCGGGGATGACGTTGGGCGCCTTGAACAGCACCATGCCG	61	tr|A0A6S6ZS59|A0A6S6ZS59_9BURK_2,3-dihydroxybenzoate-AMP_ligase_OS=Achromobacter_pestifer_OX=1353889_GN=dhbE_PE=4_SV=1~~~tr|A0A2S8V633|A0A2S8V633_9BURK_2,3-dihydroxybenzoate-AMP_ligase_OS=Achromobacter_sp._MYb9_OX=1827284_GN=CQ050_23300_PE=4_SV=1~~~tr|A0A7X9ZEA6|A0A7X9ZEA6_9BURK_AMP-binding_protein_OS=Achromobacter_sp._Bel_OX=2727415_GN=HG262_12395_PE=4_SV=1~~~tr|F7T929|F7T929_9BURK_AMP-binding_e…
3	n53459	1	0	39	1	15	0	0	3.78127e-08	0.00047463	0.706187	6.25023	CACGCTGGACATGGAAAGCTACATGACGGATACGCCCGATGGCCGCCAGGCGCTGAACTACGCCTACCGC	70	tr|A0A366GEE4|A0A366GEE4_9BURK_Glyoxylase-like_metal-dependent_hydrolase_(Beta-lactamase_superfamily_II)_OS=Achromobacter_marplatensis_OX=470868_GN=DFP87_101769_PE=4_SV=1~~~tr|A0A6S7F4Z9|A0A6S7F4Z9_9BURK_N-acyl_homoserine_lactonase_OS=Achromobacter_insolitus_OX=217204_GN=aiiA_PE=4_SV=1~~~tr|A0A095UNA6|A0A095UNA6_9BURK_Betaine-aldehyde_dehydrogenase_OS=Achromobacter_sp._RTa_OX=1532557_GN=JL37_1979…
3	n53499	1	0	39	1	15	0	0	3.78127e-08	0.00047463	0.706187	6.25023	CAACGTGCGCTACGTCGAAAGCTATCAGCCGGCCATGCCCACCAACATCGCACTGGCCGTGCGCAAGGGCGACGCCGAACGCGTCAAGCAGCTCAACGCG	100	tr|A0A0M7ETV0|A0A0M7ETV0_9BURK_Glutamine-binding_periplasmic_protein_OS=Achromobacter_aegrifaciens_OX=1287736_GN=glnH_1_PE=4_SV=1~~~tr|A0A658AHF0|A0A658AHF0_ALCXX_Amino_acid_ABC_transporter_substrate-binding_protein_OS=Alcaligenes_xylosoxydans_xylosoxydans_OX=85698_GN=DAI43_00085_PE=4_SV=1~~~tr|A0A424WKB2|A0A424WKB2_ALCXX_Amino_acid_ABC_transporter_substrate-binding_protein_OS=Alcaligenes_xylosox…
3	n53521	1	0	39	1	15	0	0	3.78127e-08	0.00047463	0.706187	6.25023	CCCGCGCAGCGGGCGCGGCGTGGGGGCACTTGTCCTCAGAAAGCTAGCCTAGCACGGGCCGCCTTATGGCCGATG	75	tr|A0A246QA06|A0A246QA06_9BURK_Uncharacterized_protein_OS=Achromobacter_sp._HZ28_OX=2015171_GN=CEY04_10665_PE=4_SV=1~~~tr|J4PDM9|J4PDM9_9BURK_Uncharacterized_protein_OS=Achromobacter_marplatensis_OX=470868_GN=QWC_08606_PE=4_SV=1~~~tr|A0A366G6Z0|A0A366G6Z0_9BURK_CoA_transferase_family_III_OS=Achromobacter_marplatensis_OX=470868_GN=DFP87_102417_PE=4_SV=1
3	n53578	1	0	39	1	15	0	0	3.78127e-08	0.00047463	0.706187	6.25023	ATTCCGTTCTGCCCGCGCCCAGATAGGCGCTGGAAAGCTCAGCGCCGGCGCTGCCCGTCAGCACGTCGCGCGTGCCCTCGAAGAC	85	tr|A0A446CK98|A0A446CK98_9BURK_High-affinity_branched-chain_amino_acid_transport_ATP-binding_protein_LivF_OS=Achromobacter_veterisilvae_OX=2069367_GN=livF_18_PE=4_SV=1~~~tr|A0A6S7FFR6|A0A6S7FFR6_9BURK_High-affinity_branched-chain_amino_acid_transport_ATP-binding_protein_LivF_OS=Achromobacter_insolitus_OX=217204_GN=livF_41_PE=4_SV=1~~~tr|A0A6S7DD99|A0A6S7DD99_9BURK_High-affinity_branched-chain_ami…
3	n53588	1	0	39	1	15	0	0	3.78127e-08	0.00047463	0.706187	6.25023	ACGCCCTGACGGCCGTCTGCAAAGCTCAGGCGCCGGTGAACGCCGGCGGGCGCTTCTGCGC	61	tr|A0A424WFG6|A0A424WFG6_ALCXX_2-(1,2-epoxy-1,2-dihydrophenyl)acetyl-CoA_isomerase_OS=Alcaligenes_xylosoxydans_xylosoxydans_OX=85698_GN=DY367_09875_PE=3_SV=1~~~tr|A0A658AHT0|A0A658AHT0_ALCXX_2-(1,2-epoxy-1,2-dihydrophenyl)acetyl-CoA_isomerase_OS=Alcaligenes_xylosoxydans_xylosoxydans_OX=85698_GN=DAI43_01085_PE=3_SV=1~~~tr|A0A0M7LC01|A0A0M7LC01_9BURK_Probable_enoyl-CoA_hydratase_echA8_OS=Achromobac…
3	n53698	1	0	39	1	15	0	0	3.78127e-08	0.00047463	0.706187	6.25023	CGCGGAAAGCTCGCGCAGCGCCTCGGAACTGGCCGTGGCGGCG	43	tr|A0A6S7F7E7|A0A6S7F7E7_9BURK_Methyl-accepting_chemotaxis_protein_I_OS=Achromobacter_insolitus_OX=217204_GN=tsr_4_PE=4_SV=1~~~tr|A0A446CNY9|A0A446CNY9_9BURK_Methyl-accepting_chemotaxis_protein_I_OS=Achromobacter_veterisilvae_OX=2069367_GN=tsr_4_PE=4_SV=1~~~tr|A0A095UFS3|A0A095UFS3_9BURK_Chemotaxis_protein_OS=Achromobacter_sp._RTa_OX=1532557_GN=JL37_25560_PE=4_SV=1~~~tr|A0A446C439|A0A446C439_9BUR…
3	n53714	1	0	39	1	15	0	0	3.78127e-08	0.00047463	0.706187	6.25023	ATTGGGCAGCACATGGCGGAACATGGTGTAAAGCTCGGAGTTGCCCAGCACGCGCGAGGAT	61	tr|A0A6S7EYX8|A0A6S7EYX8_9BURK_Dipeptide_transport_system_permease_protein_DppB_OS=Achromobacter_insolitus_OX=217204_GN=dppB_2_PE=3_SV=1~~~tr|A0A6S7F4Z4|A0A6S7F4Z4_9BURK_Glutathione_transport_system_permease_protein_GsiD_OS=Achromobacter_insolitus_OX=217204_GN=gsiD_7_PE=3_SV=1~~~tr|A0A6S7D597|A0A6S7D597_9BURK_Glutathione_transport_system_permease_protein_GsiD_OS=Achromobacter_anxifer_OX=1287737_G…
3	n53739	1	0	39	1	15	0	0	3.78127e-08	0.00047463	0.706187	6.25023	CGCGGCCCATGGCGCCGCAAAGCTCGGGCACAGACCGCCCGCATTGCCGAAGCTGGTTTCCATTCCCGCCGCCGAATGGCGTTCCACAACTTCGACGTCATGGCCT	106	tr|A0A6S7BMX1|A0A6S7BMX1_9BURK_D-amino_acid_dehydrogenase_1_OS=Achromobacter_deleyi_OX=1353891_GN=dadA1_5_PE=4_SV=1~~~tr|A0A6S7CVC4|A0A6S7CVC4_9BURK_Uncharacterized_protein_OS=Achromobacter_pulmonis_OX=1389932_GN=LMG26788_01624_PE=4_SV=1~~~tr|A0A6S7BYT2|A0A6S7BYT2_9BURK_Ferrichrome_receptor_FcuA_OS=Achromobacter_piechaudii_OX=72556_GN=fcuA_1_PE=3_SV=1~~~tr|D4XIC4|D4XIC4_9BURK_TonB-dependent_sider…
3	n53800	1	0	39	1	15	0	0	3.78127e-08	0.00047463	0.706187	6.25023	CCTGCTCGCCTTCGTGGCGCAAAGCTTTCCGGCCGCGCAGCTGGCGCCGGTCGACGATCCT	61	tr|A0A6S7EZ80|A0A6S7EZ80_9BURK_Glutathione_S-transferase_GST-6.0_OS=Achromobacter_insolitus_OX=217204_GN=gstB_1_PE=4_SV=1~~~tr|A0A4V1MRW6|A0A4V1MRW6_9BURK_Glutathione_S-transferase_OS=Achromobacter_aloeverae_OX=1750518_GN=C7R54_17640_PE=4_SV=1~~~tr|A0A446C340|A0A446C340_9BURK_Glutathione_S-transferase_GST-6.0_OS=Achromobacter_veterisilvae_OX=2069367_GN=gstB_1_PE=4_SV=1~~~tr|A0A2N8KP36|A0A2N8KP36_…
3	n53817	1	0	39	1	15	0	0	3.78127e-08	0.00047463	0.706187	6.25023	CGGCCTGCGATACGACACCGGCGTGGCGGAAAGCTTGAGCGGGTTCGCCAACAGGTTGAGC	61	tr|A0A6S7AAG8|A0A6S7AAG8_9BURK_Acetyl-CoA:oxalate_CoA-transferase_OS=Achromobacter_deleyi_OX=1353891_GN=yfdE_1_PE=4_SV=1~~~tr|A0A0L8ER01|A0A0L8ER01_9BURK_CoA-transferase_OS=Achromobacter_sp._DMS1_OX=1688405_GN=AD428_10750_PE=4_SV=1~~~tr|A0A2N8KJ00|A0A2N8KJ00_9BURK_CoA_transferase_OS=Achromobacter_pulmonis_OX=1389932_GN=C1I89_13220_PE=4_SV=1~~~tr|A0A6S7CNJ3|A0A6S7CNJ3_9BURK_Acetyl-CoA:oxalate_CoA-…
3	n53825	1	0	39	1	15	0	0	3.78127e-08	0.00047463	0.706187	6.25023	CATGGCGGCCATGTTCACCACCACCAGGTAAAGCTTGCCGACCAGGTAGGCGGCGTGCCCC	61	tr|A0A6S7D9C4|A0A6S7D9C4_9BURK_C4-dicarboxylate_transport_protein_OS=Achromobacter_anxifer_OX=1287737_GN=dctA_1_PE=4_SV=1~~~tr|A0A0M7F111|A0A0M7F111_9BURK_Glutamate-aspartate_carrier_protein_OS=Achromobacter_aegrifaciens_OX=1287736_GN=gltP_2_PE=4_SV=1~~~tr|A0A658AFF6|A0A658AFF6_ALCXX_Sodium:dicarboxylate_symporter_(Fragment)_OS=Alcaligenes_xylosoxydans_xylosoxydans_OX=85698_GN=DAI43_07220_PE=4_SV…
3	n53847	1	0	39	1	15	0	0	3.78127e-08	0.00047463	0.706187	6.25023	GCTGACCTTGTCGCGGTAGGCACAAAGCTTGTCCAGGTCGGACTCGGAGCGCGCCAGCTTC	61	tr|A0A2S5GNZ9|A0A2S5GNZ9_9BURK_Cyclase_OS=Achromobacter_spanius_OX=217203_GN=C4E15_20495_PE=4_SV=1~~~tr|J4QY00|J4QY00_9BURK_Tryptophan_synthase_alpha_chain_OS=Achromobacter_marplatensis_OX=470868_GN=trpA_PE=3_SV=1~~~tr|A0A366G319|A0A366G319_9BURK_Tryptophan_synthase_alpha_chain_OS=Achromobacter_marplatensis_OX=470868_GN=trpA_PE=3_SV=1~~~tr|A0A7T4E0Y7|A0A7T4E0Y7_9BURK_Tryptophan_synthase_subunit_a…
3	n53937	1	0	39	1	15	0	0	3.78127e-08	0.00047463	0.706187	6.25023	CAAAGCCAAAGCTGAGTGGGGCCGCAATTCAGAGGCGCTCCAGGCGCGACGTTGTGCCACCTAG	64
3	n53944	1	0	39	1	15	0	0	3.78127e-08	0.00047463	0.706187	6.25023	GGCCGGAAAGGCATTGCTGACCGCCACGTAAAGCTGCACCTGGCCCAGATCGGTGACGGGCTTGAAATCCTCCTGCCAC	79	tr|E3HHM2|E3HHM2_ACHXA_Extra-cytoplasmic_solute_receptor_family_protein_18_OS=Achromobacter_xylosoxidans_(strain_A8)_OX=762376_GN=AXYL_00915_PE=3_SV=1~~~tr|A0A7Y4NKJ8|A0A7Y4NKJ8_9BURK_Tripartite_tricarboxylate_transporter_substrate_binding_protein_OS=Achromobacter_deleyi_OX=1353891_GN=HLG70_04540_PE=3_SV=1~~~tr|A0A7D4E8M5|A0A7D4E8M5_9BURK_Tripartite_tricarboxylate_transporter_substrate_binding_pr…
3	n53957	1	0	39	1	15	0	0	3.78127e-08	0.00047463	0.706187	6.25023	TGGGCCAAAGCTGCCAGAAGGTGCTTTGCATCGACCAGGCCGGCGCGCAGGCGGGCAGGCT	61	tr|A0A6S7FLT9|A0A6S7FLT9_9BURK_Uncharacterized_protein_OS=Achromobacter_insolitus_OX=217204_GN=LMG6000_05530_PE=4_SV=1~~~tr|A0A6S7CEV8|A0A6S7CEV8_9BURK_Uncharacterized_protein_OS=Achromobacter_anxifer_OX=1287737_GN=LMG26858_01452_PE=4_SV=1~~~tr|A0A0M7D255|A0A0M7D255_9BURK_Uncharacterized_protein_OS=Achromobacter_aegrifaciens_OX=1287736_GN=ERS370000_00553_PE=4_SV=1~~~tr|A0A424W5V0|A0A424W5V0_ALCXX…
3	n54035	1	0	39	1	15	0	0	3.78127e-08	0.00047463	0.706187	6.25023	CGCATGGATGTTGCCGGGCGGGCGCGGCGTTACCACGTTCAGGTAGGCGCGCATCATCAGCGCGACGGCCAGGCCGGCCTGCCTGGCCTGCGCGTCCTGCGCGTGCTGGCCGAACAGGCGTTCCCAGAGCGCCAGCAGCCTCGCGTCGAGCGGCTCTTCCCATTCGCCCAGCACGGAACCAGGGGTAAAGCTGTCATAGGTATACAGCGCGCTCATGGCGTCTCCGGTTCGGCAATCGGGAGCAGGTGGTCGCCGCGGGGCTCGAATCCGATCCGCACC	279	tr|H0FEQ3|H0FEQ3_9BURK_Isoleucine--tRNA_ligase_OS=Achromobacter_arsenitoxydans_SY8_OX=477184_GN=ileS_PE=3_SV=1~~~tr|A0A0Q8XVK5|A0A0Q8XVK5_9BURK_Isoleucine--tRNA_ligase_OS=Achromobacter_sp._Root83_OX=1736602_GN=ileS_PE=3_SV=1~~~tr|A0A7T4E279|A0A7T4E279_9BURK_Isoleucine--tRNA_ligase_OS=Achromobacter_deleyi_OX=1353891_GN=ileS_PE=4_SV=1~~~tr|A0A6J4ZK69|A0A6J4ZK69_9BURK_Isoleucine--tRNA_ligase_OS=Achr…
3	n54043	1	0	39	1	15	0	0	3.78127e-08	0.00047463	0.706187	6.25023	AAAGCTGTCCGCGCTGATCGGCGCGGCGCACCCGCTGCGCCTCATGCGGCTGCGCAACGGC	61	tr|A0A366G456|A0A366G456_9BURK_Putative_MFS_family_arabinose_efflux_permease_OS=Achromobacter_marplatensis_OX=470868_GN=DFP87_103945_PE=4_SV=1~~~tr|A0A7X9ZER6|A0A7X9ZER6_9BURK_MFS_transporter_OS=Achromobacter_sp._Bel_OX=2727415_GN=HG262_22500_PE=4_SV=1~~~tr|A0A2S8V6N1|A0A2S8V6N1_9BURK_MFS_domain-containing_protein_OS=Achromobacter_sp._MYb9_OX=1827284_GN=CQ050_21950_PE=4_SV=1~~~tr|A0A6S7B7A9|A0A6S…
3	n54221	1	0	39	1	15	0	0	3.78127e-08	0.00047463	0.706187	6.25023	GCCTGAAGAGGTCGCAAGCAAGAAAGCGAAGCGCAGTATGTGACGCCGACTTGACAAGCGA	61
3	n54333	1	0	39	1	15	0	0	3.78127e-08	0.00047463	0.706187	6.25023	GGCCCGGCTGGACGCGCTGGCTTCGGCCGAAAGCGACGCGGCCCAAGCGGCGGGCGTCGCC	61
3	n54341	1	0	39	1	15	0	0	3.78127e-08	0.00047463	0.706187	6.25023	GAAAGCGACGTTGGTGGTGCGCAGGCCCGCGCAGGAACGGATGCGGTAGAGGGGTTCGCCC	61	tr|A0A7T4B0V9|A0A7T4B0V9_9BURK_SMP-30/gluconolactonase/LRE_family_protein_OS=Achromobacter_deleyi_OX=1353891_GN=I6I07_23800_PE=4_SV=1~~~tr|A0A5K6E7F3|A0A5K6E7F3_ALCXX_Gluconolactonase_OS=Alcaligenes_xylosoxydans_xylosoxydans_OX=85698_GN=AL520_18055_PE=4_SV=1~~~tr|A0A2M9H063|A0A2M9H063_9BURK_Uncharacterized_protein_OS=Achromobacter_ruhlandii_OX=72557_GN=LMG3328_04833_PE=4_SV=1~~~tr|A0A6S7BXT1|A0A6…
3	n54377	1	0	39	1	15	0	0	3.78127e-08	0.00047463	0.706187	6.25023	GAACTCCACGAAAGCGATCGTCTTGGCCGGAAGGTTCAGGCGTTCGGGATACAGCGCGTGG	61	tr|A0A6S7D683|A0A6S7D683_9BURK_HTH-type_transcriptional_regulator_DmlR_OS=Achromobacter_dolens_OX=1287738_GN=dmlR_19_PE=3_SV=1~~~tr|A0A0M7ET21|A0A0M7ET21_ALCXX_D-malate_degradation_protein_R_OS=Alcaligenes_xylosoxydans_xylosoxydans_OX=85698_GN=dmlR_18_PE=3_SV=1~~~tr|A0A5K6E8C6|A0A5K6E8C6_ALCXX_LysR_family_transcriptional_regulator_OS=Alcaligenes_xylosoxydans_xylosoxydans_OX=85698_GN=AL520_21325_P…
3	n54443	1	0	39	1	15	0	0	3.78127e-08	0.00047463	0.706187	6.25023	GTCGGCCGCGGCGGTGGCGCCGCTGGCGGAAAGCGAGCCGCCCGTGCCGAGCGTGGCGCCGGCGGGT	67
3	n54499	1	0	39	1	15	0	0	3.78127e-08	0.00047463	0.706187	6.25023	GGCCCCGCCCAAGGCGGCGCTATTCGCCTATCGGGATGAAAGCGAGGTCTTTGCCGAACATGCCCGCACAACCGCGGGCCGGGACCTGGATTACAGCGGGCTGGATTACGCGGCG	115	tr|J4Z2C6|J4Z2C6_9BURK_Nitrate_reductase_OS=Achromobacter_marplatensis_OX=470868_GN=QWC_04018_PE=3_SV=1~~~tr|A0A7X9W7U9|A0A7X9W7U9_9BURK_Nitrate_reductase_(Fragment)_OS=Achromobacter_sp._Bel_OX=2727415_GN=HG262_30705_PE=3_SV=1~~~tr|A0A366FHQ4|A0A366FHQ4_9BURK_Assimilatory_nitrate_reductase_(NADH)_alpha_subunit_apoprotein_OS=Achromobacter_marplatensis_OX=470868_GN=DFP87_11769_PE=3_SV=1~~~tr|A0A6S7…
3	n54519	1	0	39	1	15	0	0	3.78127e-08	0.00047463	0.706187	6.25023	TTCCGGGGTGCATGCCGGCAAAGCGCAACAATTGCGGAACCAGCACACTGGTGCACAAGGT	61	tr|A0A246Q3P7|A0A246Q3P7_9BURK_LysR_family_transcriptional_regulator_OS=Achromobacter_sp._HZ28_OX=2015171_GN=CEY04_16895_PE=3_SV=1~~~tr|A0A4Q1HCC7|A0A4Q1HCC7_9BURK_LysR_family_transcriptional_regulator_OS=Achromobacter_aloeverae_OX=1750518_GN=C7R54_27510_PE=3_SV=1~~~tr|A0A7D4ICW6|A0A7D4ICW6_9BURK_Transcriptional_regulator_GcvA_OS=Achromobacter_pestifer_OX=1353889_GN=gcvA_PE=3_SV=1~~~tr|A0A2S8VDG2…
3	n54540	1	0	39	1	15	0	0	3.78127e-08	0.00047463	0.706187	6.25023	CAGAAAGCGCAAGACTTCGGCCCAATCGTTGGTCGACAGGGC	42	tr|A0A6S7E2J8|A0A6S7E2J8_9BURK_Uncharacterized_protein_OS=Achromobacter_piechaudii_OX=72556_GN=LMG1861_03936_PE=4_SV=1~~~tr|A0A6J5B7Q2|A0A6J5B7Q2_9BURK_Uncharacterized_protein_OS=Achromobacter_insuavis_OX=1287735_GN=LMG26845_04872_PE=4_SV=1~~~tr|A0A0M7G384|A0A0M7G384_9BURK_Uncharacterized_protein_OS=Achromobacter_sp._OX=134375_GN=ERS370003_01528_PE=4_SV=1~~~tr|A0A6S7C5T1|A0A6S7C5T1_9BURK_Uncharac…
3	n54569	1	0	39	1	15	0	0	3.78127e-08	0.00047463	0.706187	6.25023	GGTACGAAAGCGCACCTGCAGGCGTTCGACGTGTTCGCCATCCTGCGGCGGGGTCAGCCGC	61	tr|A0A2T5CUS5|A0A2T5CUS5_ALCXX_DEAD/DEAH_box_helicase_family_protein_OS=Alcaligenes_xylosoxydans_xylosoxydans_OX=85698_GN=DAI43_09885_PE=4_SV=1~~~tr|A0A3Q9KJV7|A0A3Q9KJV7_9BURK_Helicase_OS=Achromobacter_spanius_OX=217203_GN=ELS24_28390_PE=4_SV=1~~~tr|J4Y1G2|J4Y1G2_9BURK_SNF2-like_protein_OS=Achromobacter_marplatensis_OX=470868_GN=QWC_28031_PE=4_SV=1~~~tr|E3HVT0|E3HVT0_ACHXA_ATP-sulfurylase_small_…
3	n54830	1	0	39	1	15	0	0	3.78127e-08	0.00047463	0.706187	6.25023	GGACGGCCGCGCGACCGCCGAAAGCGCCTACTACCTGAGCGCCAACCGCAACAA	54	tr|A0A6S7AAG8|A0A6S7AAG8_9BURK_Acetyl-CoA:oxalate_CoA-transferase_OS=Achromobacter_deleyi_OX=1353891_GN=yfdE_1_PE=4_SV=1~~~tr|A0A0L8ER01|A0A0L8ER01_9BURK_CoA-transferase_OS=Achromobacter_sp._DMS1_OX=1688405_GN=AD428_10750_PE=4_SV=1~~~tr|A0A2N8KJ00|A0A2N8KJ00_9BURK_CoA_transferase_OS=Achromobacter_pulmonis_OX=1389932_GN=C1I89_13220_PE=4_SV=1~~~tr|A0A6S7CNJ3|A0A6S7CNJ3_9BURK_Acetyl-CoA:oxalate_CoA-…
3	n54844	1	0	39	1	15	0	0	3.78127e-08	0.00047463	0.706187	6.25023	CACATGCTTCAGTTCATAAAGCGCCTCGACCGCGTCGGCATCGGCCTGGGTCATGGCTTCG	61	tr|A0A6S7CYN3|A0A6S7CYN3_9BURK_Putative_sulfate_transporter_OS=Achromobacter_anxifer_OX=1287737_GN=LMG26858_01779_PE=3_SV=1~~~tr|A0A6S7F3H3|A0A6S7F3H3_9BURK_Putative_sulfate_transporter_OS=Achromobacter_insolitus_OX=217204_GN=LMG6000_01723_PE=3_SV=1~~~tr|A0A0M7EC98|A0A0M7EC98_9BURK_Probable_sulfate_transporter_Rv1739c/MT1781_OS=Achromobacter_aegrifaciens_OX=1287736_GN=ERS370000_01150_PE=3_SV=1~~~…
3	n54922	1	0	39	1	15	0	0	3.78127e-08	0.00047463	0.706187	6.25023	GAAAGCGCCGACGCCGAGGAATTCTTCCGCACACCCAAACATCCCTATGCGCGGCAGTTGT	61	tr|A0A6S7ADZ7|A0A6S7ADZ7_9BURK_Arginine_transport_ATP-binding_protein_ArtM_OS=Achromobacter_deleyi_OX=1353891_GN=artM_PE=3_SV=1~~~tr|A0A0D6HQ51|A0A0D6HQ51_ALCXX_Arginine_transport_ATP-binding_protein_ArtM_OS=Alcaligenes_xylosoxydans_xylosoxydans_OX=85698_GN=artM_7_PE=3_SV=1~~~tr|A0A6J5I372|A0A6J5I372_9BURK_Arginine_transport_ATP-binding_protein_ArtM_OS=Achromobacter_insuavis_OX=1287735_GN=artM_2_…
3	n54997	1	0	39	1	15	0	0	3.78127e-08	0.00047463	0.706187	6.25023	ACGCGCCGCCCGCGACCAGTTGCAAAGCGCCGGCCTGACCGACGCGCTGCAAGCGCTGGAT	61	tr|A0A0X8P0J6|A0A0X8P0J6_ALCXX_RNA_polymerase_sigma_factor_RpoH_OS=Alcaligenes_xylosoxydans_xylosoxydans_OX=85698_GN=rpoH_PE=3_SV=1~~~tr|O82848|O82848_ALCXX_RNA_polymerase_sigma_factor_RpoH_OS=Alcaligenes_xylosoxydans_xylosoxydans_OX=85698_GN=rpoH_PE=3_SV=1~~~tr|A0A109Y162|A0A109Y162_ALCXX_RNA_polymerase_sigma_factor_RpoH_OS=Alcaligenes_xylosoxydans_xylosoxydans_OX=85698_GN=rpoH_PE=4_SV=1~~~tr|A0…
3	n55008	1	0	39	1	15	0	0	3.78127e-08	0.00047463	0.706187	6.25023	GGCTTTTTTTCGCCTGTGCGGAAAGCGCCGGCCGCGCTTCATATGGCGGGACGCTCCGGGCTCAAGTGTGGCC	73	tr|A0A7T4E632|A0A7T4E632_9BURK_DMT_family_transporter_OS=Achromobacter_deleyi_OX=1353891_GN=I6I07_13080_PE=4_SV=1~~~tr|A0A6J5A314|A0A6J5A314_9BURK_Uncharacterized_protein_OS=Achromobacter_insuavis_OX=1287735_GN=LMG26845_02818_PE=4_SV=1~~~tr|A0A0M7CUW4|A0A0M7CUW4_9BURK_Putative_DMT_superfamily_transporter_inner_membrane_protein_OS=Achromobacter_sp._OX=134375_GN=ERS370003_00446_PE=4_SV=1~~~tr|A0A12…
3	n55017	1	0	39	1	15	0	0	3.78127e-08	0.00047463	0.706187	6.25023	GCGCCAGGCCGATGGACAGGCCGCACTGCATGCCGGCGAAGGCCGGCCGGGCCTGGGGCAGGTATAGGCGCGCGTCGGAATGGATCAGCCATTCGGGGCCGATGCGCACATCACGCAGTTCCAGCGCAGCGGTATTGGTCGATTGCAAGGCCAGCAAAGGCAGGTCCGCGCTGCGCTCCAGTCCTGCAATGTCGTGCGGGAGCGCCACCACTGCTGGCGTGCCATCGGGCGCGGCAACCGCGGCCGCCACCAGGAAGCCTTGCGGCCGCAGGTTCGTGACCCAAGGCATCTGTCCGTCCAGCGCCCACGCATCGTCCGCCTCGCGCGCGGCGATCTGCAAAGACTCGATGCCGCTGAGGAACTTCATGGCATTCGACAGCGCCGTCGCGCCGGCCTGCT…	903	tr|A0A6S7CQF8|A0A6S7CQF8_9BURK_Acyl-CoA_dehydrogenase_OS=Achromobacter_pulmonis_OX=1389932_GN=mmgC_2_PE=3_SV=1~~~tr|A0A7Y4K3Y3|A0A7Y4K3Y3_9BURK_Acyl-CoA/acyl-ACP_dehydrogenase_OS=Achromobacter_deleyi_OX=1353891_GN=HLG70_04435_PE=3_SV=1~~~tr|A0A7D4I1Q9|A0A7D4I1Q9_9BURK_Acyl-CoA_dehydrogenase_family_protein_OS=Achromobacter_pestifer_OX=1353889_GN=FOC84_21335_PE=3_SV=1~~~tr|A0A848NCH8|A0A848NCH8_9BU…
3	n55129	1	0	39	1	15	0	0	3.78127e-08	0.00047463	0.706187	6.25023	GTTTTCCTCTTCGCGCGTGCGGTAGCCGAAAGCGCTGCCCGGAATCGACGAACTCTGGTGG	61	tr|A0A3R9GY29|A0A3R9GY29_ACHDE_2-oxoisovalerate_dehydrogenase_OS=Achromobacter_denitrificans_OX=32002_GN=FOC81_30665_PE=4_SV=1~~~tr|A0A5N7ZR06|A0A5N7ZR06_9BURK_2-oxoisovalerate_dehydrogenase_OS=Achromobacter_sp._OX=134375_GN=E2603_20310_PE=4_SV=1~~~tr|A0A446C8E2|A0A446C8E2_9BURK_2-oxoisovalerate_dehydrogenase_subunit_beta_OS=Achromobacter_veterisilvae_OX=2069367_GN=bfmBAB_PE=4_SV=1~~~tr|E3HQT6|E3…
3	n55172	1	0	39	1	15	0	0	3.78127e-08	0.00047463	0.706187	6.25023	GTAGTACATGCCGTCAAAGCGCGACTTGGAGGCCACGCCATTCCAGCGCCGGGCGTCGTCC	61	tr|A0A366FWK1|A0A366FWK1_9BURK_Rhs_element_Vgr_protein_OS=Achromobacter_marplatensis_OX=470868_GN=DFP87_105149_PE=3_SV=1~~~tr|J4QMV9|J4QMV9_9BURK_Rhs_element_Vgr_family_protein_1_OS=Achromobacter_marplatensis_OX=470868_GN=QWC_23530_PE=3_SV=1~~~tr|A0A6S7AEV1|A0A6S7AEV1_9BURK_Uncharacterized_protein_OS=Achromobacter_kerstersii_OX=1353890_GN=LMG3441_04014_PE=3_SV=1~~~tr|A0A424WHH1|A0A424WHH1_ALCXX_G…
3	n55304	1	0	39	1	15	0	0	3.78127e-08	0.00047463	0.706187	6.25023	AGCCCAGCTCGCCGTAGCAAAGCGCGCCGACCAGCATCACCAGGCCGCCC	50	tr|A0A3S9Z4F7|A0A3S9Z4F7_9BURK_APC_family_permease_OS=Achromobacter_spanius_OX=217203_GN=ELS24_15190_PE=4_SV=1~~~tr|A0A2S8V804|A0A2S8V804_9BURK_Amino_acid_permease_OS=Achromobacter_sp._MYb9_OX=1827284_GN=CQ050_20175_PE=4_SV=1~~~tr|A0A366GEC8|A0A366GEC8_9BURK_Amino_acid/polyamine/organocation_transporter_(APC_superfamily)_OS=Achromobacter_marplatensis_OX=470868_GN=DFP87_101759_PE=4_SV=1~~~tr|A0A6S…
3	n55318	1	0	39	1	15	0	0	3.78127e-08	0.00047463	0.706187	6.25023	GAAAGCGCGCCGCATGATCAGCGAGAACCAGGGCACCGTCGACTGCGCGACCGCCGTCAGC	61	tr|A0A4Q1HFI0|A0A4Q1HFI0_9BURK_Propionyl-CoA_carboxylase_OS=Achromobacter_aloeverae_OX=1750518_GN=C7R54_23175_PE=4_SV=1~~~tr|A0A0M7MEC9|A0A0M7MEC9_9BURK_Probable_propionyl-CoA_carboxylase_beta_chain_5_OS=Achromobacter_aegrifaciens_OX=1287736_GN=accD5_PE=4_SV=1~~~tr|A0A658A6E5|A0A658A6E5_ALCXX_Methylmalonyl-CoA_carboxyltransferase_OS=Alcaligenes_xylosoxydans_xylosoxydans_OX=85698_GN=DAI43_28160_PE…
3	n55453	1	0	39	1	15	0	0	3.78127e-08	0.00047463	0.706187	6.25023	GCAAAGCGCGCGGCGTCCGGCCATCGTCAATCTGGGCTCCACCGCCGCCTTGCGCGGCGGC	61	tr|A0A7U0I6I6|A0A7U0I6I6_ALCXX_SDR_family_oxidoreductase_OS=Alcaligenes_xylosoxydans_xylosoxydans_OX=85698_GN=I6I48_13775_PE=4_SV=1~~~tr|A0A0M7GQV9|A0A0M7GQV9_ALCXX_3-oxoacyl-[acyl-carrier-protein]_reductase_FabG_OS=Alcaligenes_xylosoxydans_xylosoxydans_OX=85698_GN=fabG_19_PE=4_SV=1~~~tr|A0A1R1JU04|A0A1R1JU04_ALCXX_3-oxoacyl-ACP_reductase_OS=Alcaligenes_xylosoxydans_xylosoxydans_OX=85698_GN=BIZ92…
3	n55529	1	0	39	1	15	0	0	3.78127e-08	0.00047463	0.706187	6.25023	ACCCGCGAGGCTGAAAGCGCGGAATCCGCCGTGCGCTCGGCGCTGGCAGACGTCAGGCGCG	61	tr|A0A7X9ZB51|A0A7X9ZB51_9BURK_Transcriptional_activator_NhaR_OS=Achromobacter_sp._Bel_OX=2727415_GN=nhaR_PE=3_SV=1
3	n55667	1	0	39	1	15	0	0	3.78127e-08	0.00047463	0.706187	6.25023	CGCGGCGACGATGCGGCCCACGATGTCGGTGGGACCGCCGGGCGGATAGGGAATGACGACACGCAGCGGCTTGGACGGGTAGTCGGAGGCGGCCAGCGCCCTGGCGCCGCCGCAAAGCGTACCCAGGGTTGCGCCAGCGGCTCCGATCAACAGGCGGCGCCTGAGCGGGTTTGTGGGGTCCTGCGCCAGAATGCATGGTTTCATGGTTTGTCTCCCTAGTCTCATTCTTATGTAAGGCACAGCTACTCAGGATGCGGTGGCGATCGAGCCGTTGCGCCGCAGTTCGGCGAGCGCCGCTGGCTCCAGTCCCAGCATGTCCCGCAGGACCGGTTCCGTGTGAGCGCCCAGTACAGGAGGCGCGCTGCGATACTCCACGGGCGTGCCCGATAGATGCAAGGG…	472	tr|A0A6S7A6R2|A0A6S7A6R2_9BURK_Uncharacterized_protein_OS=Achromobacter_deleyi_OX=1353891_GN=LMG3458_02837_PE=3_SV=1~~~tr|H0F2I4|H0F2I4_9BURK_Uncharacterized_protein_OS=Achromobacter_arsenitoxydans_SY8_OX=477184_GN=KYC_04862_PE=3_SV=1~~~tr|A0A6S7A1H6|A0A6S7A1H6_9BURK_Uncharacterized_protein_OS=Achromobacter_animicus_OX=1389935_GN=LMG26690_00033_PE=3_SV=1~~~tr|A0A1N7R3P9|A0A1N7R3P9_9BURK_Tripartit…
3	n55668	1	0	39	1	15	0	0	3.78127e-08	0.00047463	0.706187	6.25023	CGGCTACTTCCTGACCGCCTACGAAAGCGTACCCCATGAACAGGGTGGCGCGCCGCGCCTG	61	tr|A0A0M7JRH8|A0A0M7JRH8_9BURK_SnoaL-like_domain-containing_protein_OS=Achromobacter_aegrifaciens_OX=1287736_GN=ERS370000_03837_PE=4_SV=1~~~tr|A0A424WDM5|A0A424WDM5_ALCXX_Nuclear_transport_factor_2_family_protein_OS=Alcaligenes_xylosoxydans_xylosoxydans_OX=85698_GN=DY367_12515_PE=4_SV=1~~~tr|E3HRA0|E3HRA0_ACHXA_SnoaL-like_domain-containing_protein_OS=Achromobacter_xylosoxidans_(strain_A8)_OX=7623…
3	n55680	1	0	39	1	15	0	0	3.78127e-08	0.00047463	0.706187	6.25023	GAAATTTATCACCCTGCCCTTCTTGCTGTCAAAGCGTATCCGGCCTCGGCCTGCCCCGCCC	61
3	n55776	1	0	39	1	15	0	0	3.78127e-08	0.00047463	0.706187	6.25023	GCCACAACGAGAGCATCCCACCCCGCCTCAAAGCGTCGATAAGGAATCTAGCGGCCTATGACCGCCGATTGATCGCAAGGTAACGCCCG	89
3	n56002	1	0	39	1	15	0	0	3.78127e-08	0.00047463	0.706187	6.25023	CACGCCCAAGGGCGGTCTGGAAAGCGTGGGTCTGGGCGCGACCTGGGCCGTGCCGCTCTCC	61	tr|E3HGZ1|E3HGZ1_ACHXA_MltA-interacting_protein_MipA_family_protein_OS=Achromobacter_xylosoxidans_(strain_A8)_OX=762376_GN=AXYL_03321_PE=3_SV=1~~~tr|A0A6S7C5B1|A0A6S7C5B1_9BURK_Uncharacterized_protein_OS=Achromobacter_anxifer_OX=1287737_GN=LMG26858_00740_PE=3_SV=1~~~tr|A0A6S7F467|A0A6S7F467_9BURK_Uncharacterized_protein_OS=Achromobacter_insolitus_OX=217204_GN=LMG6000_00673_PE=3_SV=1~~~tr|A0A424WF…
3	n56083	1	0	39	1	15	0	0	3.78127e-08	0.00047463	0.706187	6.25023	GGATGTACCAGCCGCGGAAAGCGGCAAGCCCGGTTGCGTTCGACGCTTGCGCATAAGCCAG	61	tr|A0A6S7FLT9|A0A6S7FLT9_9BURK_Uncharacterized_protein_OS=Achromobacter_insolitus_OX=217204_GN=LMG6000_05530_PE=4_SV=1~~~tr|A0A658AEK2|A0A658AEK2_ALCXX_DUF4434_domain-containing_protein_OS=Alcaligenes_xylosoxydans_xylosoxydans_OX=85698_GN=DAI43_05120_PE=4_SV=1~~~tr|A0A6S7CEV8|A0A6S7CEV8_9BURK_Uncharacterized_protein_OS=Achromobacter_anxifer_OX=1287737_GN=LMG26858_01452_PE=4_SV=1~~~tr|A0A0M7D255|A…
3	n56203	1	0	39	1	15	0	0	3.78127e-08	0.00047463	0.706187	6.25023	CTGGCGCTGGCCGCCCGAAAACTCGTGCGGAAAGCGGCCGGCGTCGCTGGCGGACAGGCCAACCAGTTCC	70	tr|A0A6S6ZCT6|A0A6S6ZCT6_9BURK_Oligopeptide_transport_ATP-binding_protein_OppF_OS=Achromobacter_kerstersii_OX=1353890_GN=oppF_3_PE=4_SV=1~~~tr|A0A2S0ICS5|A0A2S0ICS5_9BURK_Peptide_ABC_transporter_ATP-binding_protein_OS=Achromobacter_spanius_OX=217203_GN=CLM73_23570_PE=4_SV=1~~~tr|A0A6S6ZJL6|A0A6S6ZJL6_9BURK_Oligopeptide_transport_ATP-binding_protein_OppF_OS=Achromobacter_animicus_OX=1389935_GN=opp…
3	n56465	1	0	39	1	15	0	0	3.78127e-08	0.00047463	0.706187	6.25023	CAAGGTCAGCGCGCCCGCCAGCGCCACCGCGCAGCCAGATCGCGCCACCCTGGCCGCGCCAAAGCGGTGAGCTAGGCGCGGCGCCAGCATGCCGGCGGCGAAC	103	tr|A0A2D0AW90|A0A2D0AW90_9BURK_MFS_transporter_OS=Achromobacter_sp._HZ28_OX=2015171_GN=CEY04_24200_PE=4_SV=1~~~tr|A0A0X8BYN6|A0A0X8BYN6_9PSED_MFS_transporter_OS=Pseudomonas_monteilii_OX=76759_GN=APT63_16155_PE=4_SV=1~~~tr|A0A0M7K0I4|A0A0M7K0I4_9BURK_Bcr/CflA_family_efflux_transporter_OS=Achromobacter_aegrifaciens_OX=1287736_GN=bcr_3_PE=3_SV=1~~~tr|A0A6S7F417|A0A6S7F417_9BURK_Bcr/CflA_family_efflu…
3	n56529	1	0	39	1	15	0	0	3.78127e-08	0.00047463	0.706187	6.25023	CCAGTTGATGTTGGTCTGCTCGTCAAAGCGGGCCATCAGCTCCACCACCACCGTC	55	tr|A0A2S5GNS1|A0A2S5GNS1_9BURK_Polyphosphate_kinase_OS=Achromobacter_spanius_OX=217203_GN=ppk1_PE=3_SV=1~~~tr|A0A6S7AFI2|A0A6S7AFI2_9BURK_Polyphosphate_kinase_OS=Achromobacter_deleyi_OX=1353891_GN=ppk_PE=3_SV=1~~~tr|H0F0G1|H0F0G1_9BURK_Polyphosphate_kinase_OS=Achromobacter_arsenitoxydans_SY8_OX=477184_GN=ppk_PE=3_SV=1~~~tr|A0A848NCY0|A0A848NCY0_9BURK_Polyphosphate_kinase_1_OS=Achromobacter_ruhlan…
3	n56563	1	0	39	1	15	0	0	3.78127e-08	0.00047463	0.706187	6.25023	CGCGGTGGAGGCCAGCGGCAAGGGAAAGCGGGTATGCCGGGCGGTGTCCAGCACCAGCCCC	61	tr|A0A6S7F6I4|A0A6S7F6I4_9BURK_L-threonate_dehydrogenase_OS=Achromobacter_insolitus_OX=217204_GN=ltnD_PE=4_SV=1~~~tr|A0A2N8KD44|A0A2N8KD44_9BURK_3-hydroxyisobutyrate_dehydrogenase_OS=Achromobacter_pulmonis_OX=1389932_GN=C1I89_26360_PE=4_SV=1~~~tr|A0A3S9Z2E4|A0A3S9Z2E4_9BURK_NAD(P)-dependent_oxidoreductase_OS=Achromobacter_spanius_OX=217203_GN=ELS24_27925_PE=4_SV=1~~~tr|A0A3S4N5S7|A0A3S4N5S7_9BURK…
3	n56573	1	0	39	1	15	0	0	3.78127e-08	0.00047463	0.706187	6.25023	GGCTTTCAGGCGGTCGCTGAGGGTCATGCGGAAAGCGGGTGCTCGCACCCAATAGCCGTGAATGGACGTAGTCTGACACACCTTTTCCGCTCATACGGCGCGCTGCTTCAGGGCTTGCGGTCGATGACA	129	tr|A0A446CGE8|A0A446CGE8_9BURK_Malonyl_CoA-acyl_carrier_protein_transacylase_OS=Achromobacter_agilis_OX=1353888_GN=ppsD_PE=4_SV=1~~~tr|A0A7U0E5B3|A0A7U0E5B3_ALCXX_Histidine_kinase_OS=Alcaligenes_xylosoxydans_xylosoxydans_OX=85698_GN=I6I48_26855_PE=4_SV=1~~~tr|A0A4Q1HC47|A0A4Q1HC47_9BURK_LysR_family_transcriptional_regulator_OS=Achromobacter_aloeverae_OX=1750518_GN=C7R54_28450_PE=3_SV=1~~~tr|A0A0L…
3	n56577	1	0	39	1	15	0	0	3.78127e-08	0.00047463	0.706187	6.25023	CAGGTCATCAATGCGCGGTATGCCGGATGAAAGCGGGGAAAAGGGACAAGGGCGTAGCGGCA	62
3	n56585	1	0	39	1	15	0	0	3.78127e-08	0.00047463	0.706187	6.25023	CGGGCGTGGCTTGATAGGTGGCGGCGATCAACGGCAAAGCGGGGCTGTACATCGTCTCGACGATCTGC	68	tr|A0A6S7FFN1|A0A6S7FFN1_9BURK_Multidrug_resistance_protein_MdtL_OS=Achromobacter_insolitus_OX=217204_GN=mdtL_PE=4_SV=1~~~tr|A0A1R1JQ16|A0A1R1JQ16_ALCXX_Asparagine_synthase_(Glutamine-hydrolyzing)_OS=Alcaligenes_xylosoxydans_xylosoxydans_OX=85698_GN=BIZ92_10830_PE=3_SV=1~~~tr|A0A0X8BVV8|A0A0X8BVV8_9PSED_Thiamine_pyrophosphate-binding_protein_OS=Pseudomonas_monteilii_OX=76759_GN=APT63_09160_PE=3_S…
3	n56606	1	0	39	1	15	0	0	3.78127e-08	0.00047463	0.706187	6.25023	TTAATTTCATATTTAAGGTTCTTTATTTAAAGTAATTTCTCATCATTGAATCAAGCTCGATATGCAACGCCTCCCGCGCTA	81
3	n56640	1	0	39	1	15	0	0	3.78127e-08	0.00047463	0.706187	6.25023	GCTGGTGGCGGCGGACAATACCTGGAGCGGCGGCCTGTATTATCAGCCGCTGGCGTTGGGCGCGCACATTTCGATTCAGGCGGCCACAAAGTACCTGGCGGGACACTCCGACGTGATGATGGGCGTGGTCACGGTC	136	tr|A0A095VK92|A0A095VK92_9BURK_Cystathionine_beta-lyase_OS=Achromobacter_sp._RTa_OX=1532557_GN=JL37_27930_PE=3_SV=1~~~tr|A0A6N0JLS5|A0A6N0JLS5_ACHDE_Cystathionine_beta-lyase_OS=Achromobacter_denitrificans_OX=32002_GN=metC_PE=3_SV=1~~~tr|A0A424WHG8|A0A424WHG8_ALCXX_O-acetyl-ADP-ribose_deacetylase_OS=Alcaligenes_xylosoxydans_xylosoxydans_OX=85698_GN=DY367_06155_PE=4_SV=1~~~tr|A0A6S7DJF2|A0A6S7DJF2_…
3	n56650	1	0	39	1	15	0	0	3.78127e-08	0.00047463	0.706187	6.25023	GGTTTCGATGTACTCCAGGCCTGCGCCAAAGTACTCAAACTGAACTCGGGGATACGCGCGC	61	tr|A0A6S7EXF7|A0A6S7EXF7_9BURK_GGDEF_domain-containing_protein_OS=Achromobacter_insolitus_OX=217204_GN=LMG6000_01095_PE=4_SV=1~~~tr|A0A6S7DPK9|A0A6S7DPK9_9BURK_GGDEF_domain-containing_protein_OS=Achromobacter_anxifer_OX=1287737_GN=LMG26858_02717_PE=4_SV=1~~~tr|A0A2N8KHQ9|A0A2N8KHQ9_9BURK_GGDEF_domain-containing_protein_OS=Achromobacter_pulmonis_OX=1389932_GN=C1I89_18570_PE=4_SV=1~~~tr|A0A095UMR4|…
3	n56681	1	0	39	1	15	0	0	3.78127e-08	0.00047463	0.706187	6.25023	GGCCTGGATGTCGAAGGGCACGTTGCGGTCTGGCGTGGAAATGACGATTTGCCGGCCGCCCACCTTCAGCGATTCCAGCGCCGCGGCAAAGTACGGCGAGCCCACCGTGTTGTAGGCA	118	tr|A0A446CAW5|A0A446CAW5_9BURK_Aminotransferase_OS=Achromobacter_agilis_OX=1353888_GN=AGI3411_01832_PE=3_SV=1~~~tr|A0A6N0JH11|A0A6N0JH11_ACHDE_Aminotransferase_OS=Achromobacter_denitrificans_OX=32002_GN=FOC81_05205_PE=3_SV=1~~~tr|A0A5N7ZI06|A0A5N7ZI06_9BURK_Aminotransferase_OS=Achromobacter_sp._OX=134375_GN=E2603_00315_PE=3_SV=1~~~tr|J4QQ49|J4QQ49_9BURK_Sigma-54_interaction_domain-containing_prot…
3	n56682	1	0	39	1	15	0	0	3.78127e-08	0.00047463	0.706187	6.25023	CGGAATGAATTCAGGCACCCCGTTGTCGTCAAAGTACGGGTCATGAATGACCAGCGCCAGG	61	tr|A0A658AIW4|A0A658AIW4_ALCXX_Uncharacterized_protein_OS=Alcaligenes_xylosoxydans_xylosoxydans_OX=85698_GN=DAI43_03580_PE=4_SV=1~~~tr|A0A0M9I6D9|A0A0M9I6D9_9BURK_Uncharacterized_protein_OS=Achromobacter_aegrifaciens_OX=1287736_GN=ERS370000_01183_PE=4_SV=1~~~tr|A0A424W751|A0A424W751_ALCXX_Uncharacterized_protein_OS=Alcaligenes_xylosoxydans_xylosoxydans_OX=85698_GN=DY367_24485_PE=4_SV=1~~~tr|A0A7D…
3	n56739	1	0	39	1	15	0	0	3.78127e-08	0.00047463	0.706187	6.25023	ACATTTATCAAATTACGATAAAGTAGCGAAAAAAGGAGGCAGTAATCATGACCGGAGCTAGTGCCTTGCTG	71
[truncated: 29,724 more rows]

## Sheet: Cell_CF
CompId	NodeId	AlleleFreq	Pheno0Count	Pheno0TotalCount	Pheno1Count	Pheno1TotalCount	NACount	NATotalCount	p-value	q-Value	EstEffect	WaldStat	Sequence	SequenceLength	Annotations(sep=~~~)
[truncated: 13,325 more rows]

## Sheet: Cell_WT
CompId	NodeId	AlleleFreq	Pheno0Count	Pheno0TotalCount	Pheno1Count	Pheno1TotalCount	NACount	NATotalCount	p-value	q-Value	EstEffect	WaldStat	Sequence	SequenceLength	Annotations(sep=~~~)
[truncated: 10,200 more rows]

[truncated: 8 more sheets: Larvae, IPM, MEM, SSS, SXT, TGC, SSS&SXT, IPM&MEM]
