# Supplementary material for: Achromobacter spp. Adaptation in Cystic Fibrosis Infection and Candidate Biomarkers of Antimicrobial Resistance
Source: Int J Mol Sci. 2022 Aug 17;23(16):9265. doi: 10.3390/ijms23169265 (PMC9409262; doi:10.3390/ijms23169265)
Supplement: Supplementary file 1 [file ijms-23-09265-s001.zip › 08-TS2_supplementary.xlsx]

## Sheet: Isolates information
Isolates information
Analysis ID	CF Center	Infection type	Infection stage	Sampling date
1-1	VR	Chronic	Late	2014-07-03
1-2	VR	Chronic	Late	2014-11-25
2-1	VR	Chronic	Early	2014-04-14
2-2	VR	Chronic	Early	2014-07-22
2-3	VR	Chronic	Early	2014-09-15
2-4	VR	Chronic	Early	2014-11-03
3-1	VR	Chronic	Late	2017-10-18
3-2	VR	Chronic	Late	2018-05-15
3-3	VR	Chronic	Late	2018-08-07
4-1	VR	Chronic	Late	2017-12-18
4-2	VR	Chronic	Late	2018-03-19
4-3	VR	Chronic	Late	2018-09-17
5-1	VR	Chronic	Early	2018-01-08
5-2	VR	Chronic	Early	2018-06-12
5-3	VR	Chronic	Late	2018-08-29
5-4	VR	Chronic	Late	2018-10-29
6-1	VR	Occasional	Occasional	2018-07-11
6-2	VR	Occasional	Occasional	2018-10-31
7-1	VR	Chronic	Early	2017-12-21
7-2	VR	Chronic	Early	2018-01-13
7-3	VR	Chronic	Early	2018-10-25
8-1	VR	Chronic	Early	2014-08-27
8-2	VR	Chronic	Late	2017-11-21
9-1	VR	Chronic	Early	2017-11-08
9-2	VR	Chronic	Early	2018-03-12
9-3	VR	Chronic	Early	2018-05-09
9-4	VR	Chronic	Early	2018-05-30
9-5	VR	Chronic	Early	2018-05-30
9-6	VR	Chronic	Early	2018-08-30
10-1	VR	Chronic	Early	2014-06-25
10-2	VR	Chronic	Early	2014-10-22
10-3	VR	Chronic	Late	2015-10-22
10-4	VR	Chronic	Late	2017-11-20
10-5	VR	Chronic	Late	2018-09-27
10-6	VR	Chronic	Late	2018-12-17
11-1	VR	Chronic	Early	2018-01-03
11-2	VR	Chronic	Early	2018-02-28
11-3	VR	Chronic	Early	2018-10-10
12-1	VR	Occasional	Occasional	2014-06-25
12-2	VR	Occasional	Occasional	2014-11-27
13-1	VR	Chronic	Early	2018-09-11
14-1	VR	Occasional	Occasional	2014-11-03
15-1	VR	Chronic	Late	2017-11-16
16-1	VR	Occasional	Occasional	2014-12-16
17-1	VR	Occasional	Occasional	2014-10-22
18-1	VR	Chronic	Early	2014-10-03
19-1	VR	Chronic	Late	2014-10-13
20-1	VR	Occasional	Occasional	2014-10-03
21-1	VR	Chronic	Early	2018-09-06
22-1	VR	Occasional	Occasional	2014-10-27
23-1	VR	Occasional	Occasional	2014-11-06
24-1	VR	Chronic	Late	2018-07-16
25-1	VR	Occasional	Occasional	2018-07-16
26-1	VR	Chronic	Late	2014-11-19
27-1	RM	Chronic	Early	2005
27-2	RM	Chronic	Early	2006
27-3	RM	Chronic	Late	2008
27-4	RM	Chronic	Late	2009
27-5	RM	Chronic	Late	2011
27-6	RM	Chronic	Late	2012
27-7	RM	Chronic	Late	2014
27-8	RM	Chronic	Late	2015
27-9	RM	Chronic	Late	2017
27-10	RM	Chronic	Late	2018
27-11	RM	Chronic	Late	2019
28-1	RM	Chronic	Early	2008
28-2	RM	Chronic	Late	2011
28-3	RM	Chronic	Late	2012
28-4	RM	Chronic	Late	2014
28-5	RM	Chronic	Late	2015
28-6	RM	Chronic	Late	2017
28-7	RM	Chronic	Late	2018
28-8	RM	Chronic	Late	2019
29-1	RM	Chronic	Early	2005
29-2	RM	Chronic	Early	2006
29-3	RM	Chronic	Late	2008
29-4	RM	Chronic	Late	2009
29-5	RM	Chronic	Late	2011
29-6	RM	Chronic	Late	2012
29-7	RM	Chronic	Late	2014
29-8	RM	Chronic	Late	2015
29-9	RM	Chronic	Late	2018
30-1	RM	Chronic	Late	2012
30-2	RM	Chronic	Late	2017
31-1	RM	Chronic	Early	2015
31-2	RM	Chronic	Late	2019
32-1	RM	Chronic	Late	2011
32-2	RM	Chronic	Late	2016
33-1	RM	Chronic	Late	2014
33-2	RM	Chronic	Late	2018
34-1	RM	Occasional	Occasional	2006
35-1	RM	Occasional	Occasional	2019
36-1	RM	Occasional	Occasional	2019
37-1	RM	Occasional	Occasional	2019
38-1	RM	Occasional	Occasional	2019

## Sheet: susceptibility testing
Antibiotics	Disk content (µg)	Zone diameter breakpoint (mm)			Reference in the paper
		S	I	R
Trimethoprim-sulfamethoxazole	1,25/23,75	>28	28-27	<27	18
Tigecycline	15	>25	25-24	<24	16
Sulfonamides (sulphadiazine, sulphathiazole)	300	≥ 28	27-15	≤ 14	15
Imipenem	10	≥ 22	21-12	≤ 11	15
Piperacillin-tazobactam	100/10	≥ 21	20-18	≤ 17	16
Meropenem	10	≥ 24	23-14	≤ 13	15
